# Supplementary material for: ECMPride: prediction of human extracellular matrix proteins based on the ideal dataset using hybrid features with domain evidence
Source: PeerJ. 2020 Apr 29;8:e9066. doi: 10.7717/peerj.9066 (PMC7195829; doi:10.7717/peerj.9066)
Supplement: Table S2 — In addition to studies collected by ECM Atlas, more studies were collected to construct the positive dataset, and here is a list of collected studies. [file peerj-08-9066-s002.xlsx]

## Sheet: Supplemental Table S2
Table S2. Detailed list of studies used to construct the positive dataset.
In addition to studies collected by ECM Atlas, more studies were collected to construct the positive dataset, and here is a list of collected studies.
Organ	Sample condition	Disease Name	Publication date	Article name	PubMed ID
Abdominal aortic	Health	-	2011	Extracellular Matrix Composition and Remodeling in Human Abdominal Aortic Aneurysms: A Proteomics Approach	21593211
Glomerular	Health	-	2014	Global Analysis Reveals the Complexity of the Human Glomerular Extracellular Matrix	24436468
Colon	Health	-	2014	Extracellular matrix signatures of human primary metastatic colon cancers and their metastases to liver	25037231
Saphenous veins	Health	-	2016	Extracellular matrix remodelling in response to venous hypertension: proteomics of human varicose veins	27068509
Heart	Health	-	2016	Quantification of decellularized human myocardial matrix: A comparison of six patients	26172914
Glomerular	Health	-	2016	Characterization of glomerular extracellular matrix by proteomic analysis of laser captured microdissected glomeruli	27988214
Bone marrow	Health	-	2017	Proteomic characterization of human multiple myeloma bone marrow extracellular matrix	28344315
Retinal	Health	-	2017	Diabetes-related changes in the protein composition and the biomechanical properties of human retinal vascular basement membranes	29284024
Breast	Health	-	2018	Targeted matrisome analysis identifies thrombospondin-2 and tenascin-C in aligned collagen stroma from invasive breast carcinoma	30154546
Myometrium	Health	-	2018	Proteomic Characterization of the Extracellular Matrix of Human Uterine Fibroids	29788081
Dental Enamel	Health	-	2005	Proteomics and Genetics of Dental Enamel	16612087
Cartilage	Health	-	2012	Quantitative Proteomic Analysis of Eight Cartilaginous Tissues Reveals Characteristic Differences as well as Similarities between Subgroups	22493511
Articular cartilage	Health	-	2014	Quantitative proteomics at different depths in human articular cartilage reveals unique patterns of protein distribution	25193283
Bone and teeth	Health	-	2014	Multifunctional ECM proteins in bone and teeth	24486446
Tendon and Ligament	Health	-	2016	Proteomic Analysis of Human Tendon and Ligament: Solubilization and Analysis of Insoluble Extracellular Matrix in Connective Tissues	27748110
Cranial bone	Health	-	2016	A method for whole protein isolation from human cranial bone	27677936
Cartilage	Health	-	2017	Cartilage matrix remodelling differs by disease state and joint type	28836259
Abdominal aortic	General disease	Abdominal Aortic Aneurysms	2011	Extracellular Matrix Composition and Remodeling in Human Abdominal Aortic Aneurysms: A Proteomics Approach	21593211
Saphenous veins	General disease	Varicose saphenous	2016	Extracellular matrix remodelling in response to venous hypertension: proteomics of human varicose veins	27068509
Cartilage	General disease	Osteoarthritic	2017	Cartilage matrix remodelling differs by disease state and joint type	28836259
Retinal	General disease	Diabetic	2017	Diabetes-related changes in the protein composition and the biomechanical properties of human retinal vascular basement membranes	29284024
Carotid	General disease	Carotid plaques	2017	Extracellular matrix proteomics identifies molecular signature of symptomatic carotid plaques	28319050
Myometrium	General disease	Uterine Fibroids	2018	Proteomic Characterization of the Extracellular Matrix of Human Uterine Fibroids	29788081
Colon and liver	Cancer	Colon cancers liver cancer metastases	2014	Extracellular matrix signatures of human primary metastatic colon cancers and their metastases to liver	25037231
Bone marrow	Cancer	Multiple myeloma	2017	Proteomic characterization of human multiple myeloma bone marrow extracellular matrix	28344315
Breast	Cancer	Invasive breast carcinoma	2018	Targeted matrisome analysis identifies thrombospondin-2 and tenascin-C in aligned collagen stroma from invasive breast carcinoma	30154546
Ovarian	Cancer	Ovarian cancer metastases	2018	Deconstruction of a Metastatic Tumor Microenvironment Reveals a Common Matrix Response in Human Cancers	29196464
