# Supplementary material for: ECMPride: prediction of human extracellular matrix proteins based on the ideal dataset using hybrid features with domain evidence
Source: PeerJ. 2020 Apr 29;8:e9066. doi: 10.7717/peerj.9066 (PMC7195829; doi:10.7717/peerj.9066)
Supplement: Table S3 — There are three classes and 167 features in total that introduced into ECMPride to represent the characteristics of ECM proteins, including ECM protein-related structural domains (63 features), physicochemical properties (24 features), and position-specific scoring matrix (PSSM, 80 features). Also, all features are scored using the mRMR method. [file peerj-08-9066-s003.xlsx]

## Sheet: Supplemental Table S3
Table S3. Detailed list of all 167 features used in ECMPride.
There are three classes and 167 features in total that introduced into ECMPride to represent the characteristics of ECM proteins, including ECM protein-related structural domains (63 features), physicochemical properties (24 features), and position-specific scoring matrix (PSSM, 80 features). Also, all features are scored using the mRMR method.
Feature Class	Feature Name	Feature Score
ECM domains	IPR000020	0.00141254
	IPR000034	-0.000315133
	IPR000082	0.00654591
	IPR000083	-0.00212673
	IPR000294	0.00259602
	IPR000372	0.0117064
	IPR000436	0.00652223
	IPR000483	0.00425921
	IPR000538	0.00251293
	IPR000562	0.00242261
	IPR000585	0.00212771
	IPR000716	0.0075385
	IPR000782	0.000353286
	IPR000859	0.00431037
	IPR000867	0.00477446
	IPR000884	0.0167051
	IPR000885	0.00303484
	IPR001007	0.0122771
	IPR001212	0.00350203
	IPR001304	0.0104533
	IPR001442	0.00310083
	IPR001507	0.00512269
	IPR001791	0.0124771
	IPR001846	0.00271475
	IPR001881	0.025116
	IPR002035	0.0110881
	IPR002038	0.000891273
	IPR002049	0.0128127
	IPR002181	0.0127108
	IPR002861	0.00158867
	IPR003591	0.00164425
	IPR003645	0.00180261
	IPR003886	0.00151643
	IPR003961	0.00434376
	IPR003979	0.000847711
	IPR004043	0.00229595
	IPR004116	0.00178077
	IPR004850	-0.00233145
	IPR006605	0.000428499
	IPR007798	0.000887294
	IPR008160	0.0596828
	IPR008211	0.00115083
	IPR008412	0.000890865
	IPR008673	0.0017807
	IPR008859	0.00167136
	IPR009254	-0.00232286
	IPR009730	0.000885359
	IPR009837	0.000896703
	IPR009889	0.000896252
	IPR011489	0.00830236
	IPR016352	0.000717023
	IPR000157	-1.17001e-05
	IPR000242	1.00318e-05
	IPR001245	-0.00422082
	IPR001254	0.0125608
	IPR001590	0.00771623
	IPR002919	-0.00424659
	IPR006026	0.0122834
	IPR006586	0.000724466
	IPR010294	0.00180136
	IPR011009	0.000165026
	IPR013680	-0.000142035
	IPR020635	-0.000627599
Position Specific Scoring Matrix (PSSM)	PSSM_1	0.000697537
	PSSM_2	-0.00548228
	PSSM_3	-0.00214655
	PSSM_4	-0.00840461
	PSSM_5	-0.000618738
	PSSM_6	-0.0196825
	PSSM_7	-0.0279436
	PSSM_8	-0.00147885
	PSSM_9	-0.00423179
	PSSM_10	-0.0245961
	PSSM_11	-0.0102056
	PSSM_12	-0.0156526
	PSSM_13	0.00153263
	PSSM_14	-0.0333892
	PSSM_15	-0.00420106
	PSSM_16	-0.00698722
	PSSM_17	-0.00122762
	PSSM_18	-0.0112408
	PSSM_19	-0.00324644
	PSSM_20	-0.013567
	PSSM_21	-0.000624549
	PSSM_22	0.000388322
	PSSM_23	-0.00814458
	PSSM_24	0.0019506
	PSSM_25	-0.0121718
	PSSM_26	-0.00549761
	PSSM_27	0.00668965
	PSSM_28	1.02312e-05
	PSSM_29	-0.00189084
	PSSM_30	-0.00519886
	PSSM_31	0.00147395
	PSSM_32	-0.00254923
	PSSM_33	0.00153968
	PSSM_34	-0.00321027
	PSSM_35	-0.00159379
	PSSM_36	0.0054447
	PSSM_37	-0.0168442
	PSSM_38	-0.013402
	PSSM_39	-0.00175509
	PSSM_40	-0.00134903
	PSSM_41	-0.00699709
	PSSM_42	0.000559836
	PSSM_43	-0.00366809
	PSSM_44	0.0118443
	PSSM_45	-0.00268847
	PSSM_46	-0.00154146
	PSSM_47	-0.0065884
	PSSM_48	-0.0118769
	PSSM_49	-0.0033841
	PSSM_50	-0.0143411
	PSSM_51	-0.00216591
	PSSM_52	-0.00723777
	PSSM_53	-0.00688278
	PSSM_54	-0.00609325
	PSSM_55	-0.00998211
	PSSM_56	0.00541054
	PSSM_57	0.000890576
	PSSM_58	-0.0021679
	PSSM_59	0.00175721
	PSSM_60	-0.0074667
	PSSM_61	-0.00688277
	PSSM_62	-0.0193507
	PSSM_63	-0.0023317
	PSSM_64	-0.00603557
	PSSM_65	-0.000136228
	PSSM_66	-0.00301223
	PSSM_67	-0.0048703
	PSSM_68	-0.00952232
	PSSM_69	-0.00425587
	PSSM_70	-0.00213995
	PSSM_71	-0.00257204
	PSSM_72	-0.00344866
	PSSM_73	-0.000493518
	PSSM_74	-0.00441753
	PSSM_75	0.00231146
	PSSM_76	-0.00235313
	PSSM_77	-0.00870553
	PSSM_78	0.00311163
	PSSM_79	-0.0041655
	PSSM_80	-0.00333372
Physicochemical Properties (PP)	Hydrpphobicity	-0.0195737
	Hydrophilicity	-0.004202
	Isoelectric	-0.00138393
	Average flexibility indices	-0.0216293
	Molecular weight	-0.009951
	Polarity	-0.0414179
	Refractivity	-0.0135795
	Residue accessible surface area in folded protein	0.00133177
	Normalized frequency of beta-sheet	-0.0168568
	Normalized frequency of alpha-helix	0.00428729
	Normalized hydrophobicity scales for alpha-proteins	-0.037777
	Normalized hydrophobicity scales for beta-proteins	-0.0564926
	Normalized hydrophobicity scales for alpha/beta-proteins	-0.0479588
	Normalized hydrophobicity scales for alpha+beta-proteins	-0.0643631
	Melting point	-0.00475297
	Heat capacity	-0.00171401
	Side chain volume	-0.024656
	Scaled side chain hydrophobicity values	-0.0282551
	Signal sequence helical potential	-0.0112616
	Membrane-buried preference parameters	-0.0359009
	Conformational parameter of inner helix	-0.0116865
	Retention coefficient in TFA	-0.0152866
	Transfer free energy to surface	-0.0307254
	Steric parameter	-0.00569434
