# Supplementary material for: ECMPride: prediction of human extracellular matrix proteins based on the ideal dataset using hybrid features with domain evidence
Source: PeerJ. 2020 Apr 29;8:e9066. doi: 10.7717/peerj.9066 (PMC7195829; doi:10.7717/peerj.9066)
Supplement: Table S4 — There are 24 physicochemical properties used in ECMPride. For each physicochemical property, the row from “A” to “V” represent its amino acid index (AAIndex) of 20 amino acids. [file peerj-08-9066-s004.xlsx]

## Sheet: Supplemental Table S4
Table S4. Detailed list of Physicochemical properties used in ECMPride.
There are 24 physicochemical properties used in ECMPride. For each physicochemical property, the row from "A" to "V" represent its amino acid index (AAIndex) of 20 amino acids
	A	R	N	D	C	Q	E	G	H	I	L	K	M	F	P	S	T	W	Y	V
Hydrpphobicity	-1.6	12.3	4.8	9.2	-2	4.1	8.2	-1	3	-3.1	-2.8	8.8	-3.4	-3.7	0.2	-0.6	-1.2	-1.9	0.7	-2.6
Hydrophilicity	0.78	1.58	1.2	1.35	0.55	1.19	1.45	0.68	0.99	0.47	0.56	1.1	0.66	0.47	0.69	1	1.05	0.7	1	0.51
Isoelectric	6	10.76	5.41	2.77	5.05	5.65	3.22	5.97	7.59	6.02	5.98	9.74	5.74	5.48	6.3	5.68	5.66	5.89	5.66	5.96
Average flexibility indices	0.357	0.529	0.463	0.511	0.346	0.493	0.497	0.544	0.323	0.462	0.365	0.466	0.295	0.314	0.509	0.507	0.444	0.305	0.42	0.386
Molecular weight	89.09	174.2	132.12	133.1	121.15	146.15	147.13	75.07	155.16	131.17	131.17	146.19	149.21	165.19	115.13	105.09	119.12	204.24	181.19	117.15
Polarity	8.1	10.5	11.6	13	5.5	10.5	12.3	9	10.4	5.2	4.9	11.3	5.7	5.2	8	9.2	8.6	5.4	6.2	5.9
Refractivity	4.34	26.66	13.28	12	35.77	17.56	17.26	0	21.81	19.06	18.78	21.29	21.64	29.4	10.93	6.35	11.01	42.53	31.53	13.92
Residue accessible surface area in folded protein	25	90	63	50	19	71	49	23	43	18	23	97	31	24	50	44	47	32	60	18
Normalized frequency of beta-sheet	0.83	0.93	0.89	0.54	1.19	1.1	0.37	0.75	0.87	1.6	1.3	0.74	1.05	1.38	0.55	0.75	1.19	1.37	1.47	1.7
Normalized frequency of alpha-helix	1.42	0.98	0.67	1.01	0.7	1.11	1.51	0.57	1	1.08	1.21	1.16	1.45	1.13	0.57	0.77	0.83	1.08	0.69	1.06
Normalized hydrophobicity scales for alpha-proteins	-0.45	-0.24	-0.2	-1.52	0.79	-0.99	-0.8	-1	1.07	0.76	1.29	-0.36	1.37	1.48	-0.12	-0.98	-0.7	1.38	1.49	1.26
Normalized hydrophobicity scales for beta-proteins	-0.08	-0.09	-0.7	-0.71	0.76	-0.4	-1.31	-0.84	0.43	1.39	1.24	-0.09	1.27	1.53	-0.01	-0.93	-0.59	2.25	1.53	1.09
Normalized hydrophobicity scales for alpha/beta-proteins	0.17	-0.7	-0.9	-1.05	1.24	-1.2	-1.19	-0.57	-0.25	2.06	0.96	-0.62	0.6	1.29	-0.21	-0.83	-0.62	1.51	0.66	1.21
Normalized hydrophobicity scales for alpha+beta-proteins	0.36	-0.52	-0.9	-1.09	0.7	-1.05	-0.83	-0.82	0.16	2.17	1.18	-0.56	1.21	1.01	-0.06	-0.6	-1.2	1.31	1.05	1.21
Melting point	297	238	236	270	178	185	249	290	277	284	337	224	283	284	222	228	253	282	344	293
Heat capacity	29.22	26.37	38.3	37.09	50.7	44.02	41.84	23.71	59.64	45	48.03	57.1	69.32	48.52	36.13	32.4	35.2	56.92	51.73	40.35
Side chain volume	27.5	105	58.7	40	44.6	80.7	62	0	79	93.5	93.5	100	94.1	115.5	41.9	29.3	51.3	145.5	117.3	71.5
Scaled side chain hydrophobicity values	0.616	0	0.236	0.028	0.68	0.251	0.043	0.501	0.165	0.943	0.943	0.283	0.738	1	0.711	0.359	0.45	0.878	0.88	0.825
Signal sequence helical potential	1.18	0.2	0.23	0.05	1.89	0.72	0.11	0.49	0.31	1.45	3.23	0.06	2.67	1.96	0.76	0.97	0.84	0.77	0.39	1.08
Membrane-buried preference parameters	1.56	0.45	0.27	0.14	1.23	0.51	0.23	0.62	0.29	1.67	2.93	0.15	2.96	2.03	0.76	0.81	0.91	1.08	0.68	1.14
Conformational parameter of inner helix	1	0.52	0.35	0.44	0.06	0.44	0.73	0.35	0.6	0.73	1	0.6	1	0.6	0.06	0.35	0.44	0.73	0.44	0.82
Retention coefficient in TFA	7.3	-3.6	-5.7	-2.9	-9.2	-0.3	-7.1	-1.2	-2.1	6.6	20	-3.7	5.6	19.2	5.1	-4.1	0.8	16.3	5.9	3.5
Transfer free energy to surface	-0.2	-0.12	0.08	-0.2	-0.45	0.16	-0.3	0	-0.12	-2.26	-2.46	-0.35	-1.47	-2.33	-0.98	-0.39	-0.52	-2.01	-2.24	-1.56
Steric parameter	0.52	0.68	0.76	0.76	0.62	0.68	0.68	0	0.7	1.02	0.98	0.68	0.78	0.7	0.36	0.53	0.5	0.7	0.7	0.76
