# Supplementary material for: ECMPride: prediction of human extracellular matrix proteins based on the ideal dataset using hybrid features with domain evidence
Source: PeerJ. 2020 Apr 29;8:e9066. doi: 10.7717/peerj.9066 (PMC7195829; doi:10.7717/peerj.9066)
Supplement: Table S6 — All of the 167 features are ranked according to the order of the important scores from high to low. The IFS method is used to generate 167 feature subsets and further generate 167 corresponding candidate models. [file peerj-08-9066-s006.xlsx]

## Sheet: Supplemental Table S6
Table S6. Performance of all 167 candidate prediction models using 167 different feature subsets.
All of the 167 features are ranked according to the order of the important scores from high to low. The IFS method is used to generate 167 feature subsets and further generate 167 corresponding candidate models.
Number Of Features	Sensitivity	Specificity	Accuracy	Balanced Accuracy
1	0.117126	1	0.961204	0.558563
2	0.216945	0.999912	0.965505	0.608428
3	0.26484	0.999912	0.967613	0.632376
4	0.291727	0.999912	0.968794	0.645819
5	0.322496	0.999824	0.970059	0.66116
6	0.349383	0.999647	0.971072	0.674515
7	0.351306	0.999647	0.971156	0.675477
8	0.382003	0.999647	0.972505	0.690825
9	0.40889	0.999647	0.973686	0.704268
10	0.433781	0.976357	0.952516	0.705069
11	0.464514	0.975474	0.953022	0.719994
12	0.477939	0.977504	0.955552	0.727721
13	0.485668	0.987209	0.965168	0.736438
14	0.485668	0.984208	0.9623	0.734938
15	0.497134	0.989414	0.967782	0.743274
16	0.514369	0.990031	0.969132	0.7522
17	0.677504	0.859651	0.851647	0.768577
18	0.690965	0.85621	0.848948	0.773588
19	0.683273	0.858768	0.851057	0.771021
20	0.692816	0.856299	0.849119	0.774557
21	0.742816	0.856387	0.851396	0.799601
22	0.73897	0.859121	0.853842	0.799046
23	0.7332	0.861503	0.855866	0.797352
24	0.725508	0.863708	0.857637	0.794608
25	0.744739	0.858944	0.853926	0.801842
26	0.738933	0.885497	0.879058	0.812215
27	0.738933	0.88779	0.881251	0.813362
28	0.733164	0.889907	0.883022	0.811535
29	0.727431	0.890966	0.883781	0.809198
30	0.725581	0.892907	0.885552	0.809244
31	0.729354	0.894142	0.886901	0.811748
32	0.721698	0.895377	0.887745	0.808538
33	0.721698	0.896347	0.888672	0.809023
34	0.715929	0.897759	0.889769	0.806844
35	0.710196	0.898729	0.890443	0.804462
36	0.771734	0.895112	0.889685	0.833423
37	0.767888	0.896964	0.891287	0.832426
38	0.769811	0.898641	0.892975	0.834226
39	0.775581	0.900583	0.895084	0.838082
40	0.771734	0.901465	0.895759	0.8366
41	0.767888	0.903935	0.897952	0.835912
42	0.765965	0.904905	0.898795	0.835435
43	0.767888	0.905788	0.899722	0.836838
44	0.781313	0.910638	0.90495	0.845976
45	0.783237	0.912402	0.906721	0.847819
46	0.77939	0.913902	0.907986	0.846646
47	0.775544	0.914343	0.908239	0.844944
48	0.781313	0.913991	0.908156	0.847652
49	0.804282	0.902611	0.898288	0.853446
50	0.802358	0.903229	0.898794	0.852794
51	0.815784	0.906933	0.902927	0.861359
52	0.815784	0.907022	0.903011	0.861403
53	0.810051	0.902875	0.898793	0.856463
54	0.808128	0.904904	0.900649	0.856516
55	0.808128	0.905081	0.900818	0.856604
56	0.804282	0.906051	0.901577	0.855166
57	0.806205	0.907462	0.90301	0.856833
58	0.802358	0.906933	0.902335	0.854646
59	0.810015	0.907463	0.903179	0.858739
60	0.804245	0.907904	0.903348	0.856075
61	0.810015	0.908874	0.904528	0.859444
62	0.804245	0.908786	0.904191	0.856516
63	0.800399	0.909227	0.904444	0.854813
64	0.813861	0.90464	0.900648	0.85925
65	0.811938	0.901906	0.89795	0.856922
66	0.817707	0.90561	0.901745	0.861659
67	0.813861	0.907198	0.903095	0.86053
68	0.81963	0.906757	0.902927	0.863194
69	0.819666	0.906934	0.903095	0.8633
70	0.821589	0.907287	0.903517	0.864438
71	0.817671	0.909315	0.905287	0.863493
72	0.815784	0.90958	0.905457	0.862682
73	0.815784	0.909933	0.905794	0.862858
74	0.821517	0.913108	0.909083	0.867312
75	0.825363	0.91302	0.909167	0.869191
76	0.819594	0.914696	0.910516	0.867145
77	0.833019	0.914255	0.910685	0.873637
78	0.834942	0.913019	0.909589	0.873981
79	0.842634	0.912755	0.909673	0.877695
80	0.842634	0.912314	0.909252	0.877474
81	0.840711	0.907109	0.904191	0.87391
82	0.838788	0.906315	0.903347	0.872551
83	0.838788	0.906756	0.903769	0.872772
84	0.834906	0.906579	0.903431	0.870743
85	0.840675	0.90658	0.903684	0.873627
86	0.838788	0.907109	0.904106	0.872948
87	0.844557	0.907815	0.905034	0.876186
88	0.844557	0.910108	0.907227	0.877333
89	0.854173	0.913814	0.911192	0.883993
90	0.850327	0.91399	0.911191	0.882158
91	0.854136	0.915137	0.912457	0.884637
92	0.84648	0.91496	0.91195	0.88072
93	0.865639	0.916725	0.914481	0.891182
94	0.863752	0.916637	0.914312	0.890194
95	0.867562	0.916813	0.914649	0.892187
96	0.867562	0.917343	0.915155	0.892452
97	0.865639	0.917431	0.915155	0.891535
98	0.869485	0.918578	0.916421	0.894031
99	0.863752	0.920166	0.917686	0.891959
100	0.863752	0.919284	0.916843	0.891518
101	0.871408	0.920695	0.918529	0.896052
102	0.879064	0.924312	0.922325	0.901688
103	0.879064	0.924401	0.922409	0.901732
104	0.8791	0.923871	0.921903	0.901486
105	0.877177	0.92493	0.922831	0.901053
106	0.88291	0.927047	0.925108	0.904978
107	0.88291	0.926606	0.924687	0.904758
108	0.879136	0.927224	0.925108	0.90318
109	0.886756	0.928723	0.926879	0.90774
110	0.884869	0.928458	0.926542	0.906664
111	0.88291	0.925194	0.923337	0.904052
112	0.886792	0.924754	0.923084	0.905773
113	0.882983	0.923519	0.921735	0.903251
114	0.882983	0.923871	0.922072	0.903427
115	0.886756	0.925371	0.923674	0.906064
116	0.886756	0.926253	0.924518	0.906505
117	0.884833	0.926341	0.924518	0.905587
118	0.880987	0.927576	0.925529	0.904281
119	0.882874	0.927841	0.925867	0.905357
120	0.882874	0.927224	0.925277	0.905049
121	0.880987	0.926341	0.924349	0.903664
122	0.880951	0.925283	0.923337	0.903117
123	0.880951	0.925018	0.923084	0.902984
124	0.879064	0.926165	0.924096	0.902614
125	0.880987	0.926606	0.924602	0.903796
126	0.879064	0.926958	0.924855	0.903011
127	0.880987	0.928105	0.926035	0.904546
128	0.877141	0.92784	0.925613	0.90249
129	0.879028	0.927928	0.925782	0.903478
130	0.879064	0.928723	0.926541	0.903893
131	0.884797	0.928458	0.926541	0.906627
132	0.882874	0.928811	0.926794	0.905842
133	0.884797	0.929605	0.927638	0.907201
134	0.88672	0.928899	0.927047	0.90781
135	0.884797	0.932163	0.930083	0.90848
136	0.880951	0.932692	0.930421	0.906821
137	0.88672	0.930927	0.928987	0.908824
138	0.88672	0.930927	0.928987	0.908824
139	0.884797	0.930134	0.928143	0.907465
140	0.882874	0.930398	0.928312	0.906636
141	0.890566	0.929515	0.927805	0.910041
142	0.890566	0.928457	0.926794	0.909511
143	0.888643	0.928457	0.926709	0.90855
144	0.88672	0.930574	0.928649	0.908647
145	0.884797	0.930045	0.928058	0.907421
146	0.890566	0.93181	0.929999	0.911188
147	0.890566	0.933397	0.931517	0.911982
148	0.890566	0.933045	0.931179	0.911805
149	0.890566	0.932604	0.930758	0.911585
150	0.892489	0.933309	0.931516	0.912899
151	0.892489	0.935956	0.934047	0.914223
152	0.888643	0.935691	0.933625	0.912167
153	0.884797	0.932604	0.930505	0.9087
154	0.882874	0.932692	0.930505	0.907783
155	0.884797	0.932957	0.930842	0.908877
156	0.880951	0.932603	0.930336	0.906777
157	0.880951	0.931457	0.929239	0.906204
158	0.882874	0.931369	0.92924	0.907121
159	0.882874	0.930221	0.928143	0.906547
160	0.884797	0.931104	0.929071	0.90795
161	0.880951	0.92978	0.927637	0.905365
162	0.882874	0.93031	0.928227	0.906592
163	0.884797	0.930398	0.928396	0.907597
164	0.880951	0.928634	0.926541	0.904792
165	0.880951	0.929604	0.927468	0.905277
166	0.880951	0.928898	0.926794	0.904924
167	0.884761	0.929163	0.927215	0.906962
