# Supplementary material for: ECMPride: prediction of human extracellular matrix proteins based on the ideal dataset using hybrid features with domain evidence
Source: PeerJ. 2020 Apr 29;8:e9066. doi: 10.7717/peerj.9066 (PMC7195829; doi:10.7717/peerj.9066)
Supplement: Table S7 — For each ECM protein predicted by ECMPride, the information of six relevant databases (including Human Protein Atlas, ExoCarta, GO, MatrixDB, String, and EntreZ) is used for annotation. “label_HumanProteinAtlas” represents the location annotation from Human Protein Atlas (membrane, secreted, membrane&secreted, or intracellular). “label_ExoCarta” represents the exosome evidence provided by ExoCarta. “label_GO” shows the extracellular-relative Cellular Components annotation in GO, including “extracellular matrix”, “extracellular space”, “extracellular region” or “extracellular exosome”, also the corresponding GO term are listed in “label_GO_term”. “InterPro_core_Matrisome” shows domains that define the core Matrisome contained in the genes found only in ECMPrideDB. “–” represents this gene is both contained by ECMPrideDB and Matrisome. “Interaction_MatriDB” shows all Matrisome genes that interact with genes found only in ECMPrideDB (evidence from the MatrixDB database). “–” represents this gene is both contained by ECMPrideDB and Matrisome. “Interaction_String” shows all Matrisome genes that interact with genes found only in ECMPrideDB (evidence from the String database). “–” represents this gene is both contained by ECMPrideDB and Matrisome. “EntreZ link” provides the hyperlink to the corresponding entrez gene summary for each gene in ECMPrideDB. [file peerj-08-9066-s007.xlsx]

## Sheet: Supplemental Table S7
Table S7. A comprehensive collection of theoretical human ECM proteins predicted by ECMPride.
For each ECM protein predicted by ECMPride, the information of six relevant databases (including Human Protein Atlas, ExoCarta, GO, MatrixDB, String, and EntreZ) is used for annotation. "label_HumanProteinAtlas" represents the location annotation from Human Protein Atlas (membrane, secreted, membrane&secreted, or intracellular). "label_ExoCarta" represents the exosome evidence provided by ExoCart…
Entry	Primary gene name	Gene names	Probability	isInMatrisome	label_HumanProteinAtlas	label_ExoCarta	label_GO	label_GO_term	InterPro_core_Matrisome	Interaction_MatrixDB	Interaction_String	EntreZ link
P13942	COL11A2	COL11A2	0.997232	Yes	secreted	NULL	extracellular matrix structural constituent conferring tensile strength|collagen-containing extracellular matrix|extracellular region|extracellular matrix structural constituent|extracellular space|extracellular matrix organization|extracellular matrix	GO:0030020|GO:0062023|GO:0005576|GO:0005201|GO:0005615|GO:0030198|GO:0031012	--	--	--	COL11A2
P20908	COL5A1	COL5A1	0.994949	Yes	secreted	isExome	collagen-containing extracellular matrix|extracellular region|extracellular matrix|extracellular matrix structural constituent conferring tensile strength|extracellular matrix structural constituent|extracellular space|extracellular matrix organization	GO:0062023|GO:0005576|GO:0031012|GO:0030020|GO:0005201|GO:0005615|GO:0030198	--	--	--	COL5A1
Q4LDE5	SVEP1	SVEP1 C9orf13 CCP22 SELOB	0.994687	Yes	secreted	isExome	extracellular region	GO:0005576	--	--	--	SVEP1
P25940	COL5A3	COL5A3	0.994667	Yes	secreted	NULL	extracellular matrix structural constituent conferring tensile strength|collagen-containing extracellular matrix|extracellular region|extracellular matrix structural constituent|extracellular space|extracellular matrix organization|extracellular matrix	GO:0030020|GO:0062023|GO:0005576|GO:0005201|GO:0005615|GO:0030198|GO:0031012	--	--	--	COL5A3
Q8TER0	SNED1	SNED1	0.993778	Yes	secreted	NULL	extracellular region	GO:0005576	--	--	--	SNED1
P05997	COL5A2	COL5A2	0.993434	Yes	secreted	isExome	extracellular matrix structural constituent conferring tensile strength|collagen-containing extracellular matrix|extracellular region|extracellular matrix structural constituent|extracellular space|extracellular matrix organization|extracellular matrix	GO:0030020|GO:0062023|GO:0005576|GO:0005201|GO:0005615|GO:0030198|GO:0031012	--	--	--	COL5A2
P04275	VWF	VWF F8VWF	0.993172	Yes	secreted	isExome	collagen-containing extracellular matrix|extracellular region|extracellular exosome|extracellular matrix structural constituent|extracellular matrix organization	GO:0062023|GO:0005576|GO:0070062|GO:0005201|GO:0030198	--	--	--	VWF
Q9H324	ADAMTS10	ADAMTS10	0.99299	Yes	secreted	NULL	collagen-containing extracellular matrix	GO:0062023	--	--	--	ADAMTS10
P49746	THBS3	THBS3 TSP3	0.992586	Yes	secreted	NULL	collagen-containing extracellular matrix|extracellular region|extracellular matrix structural constituent	GO:0062023|GO:0005576|GO:0005201	--	--	--	THBS3
P02458	COL2A1	COL2A1	0.992121	Yes	secreted	isExome	collagen-containing extracellular matrix|extracellular region|extracellular matrix|extracellular matrix structural constituent conferring tensile strength|extracellular matrix structural constituent|extracellular space|extracellular matrix organization	GO:0062023|GO:0005576|GO:0031012|GO:0030020|GO:0005201|GO:0005615|GO:0030198	--	--	--	COL2A1
P07996	THBS1	THBS1 TSP TSP1	0.99097	Yes	secreted	isExome	collagen-containing extracellular matrix|extracellular region|extracellular exosome|extracellular space|extracellular matrix organization|extracellular matrix structural constituent|extracellular matrix	GO:0062023|GO:0005576|GO:0070062|GO:0005615|GO:0030198|GO:0005201|GO:0031012	--	--	--	THBS1
Q9NR61	DLL4	DLL4 UNQ1895/PRO4341	0.990828	No	membrane	NULL	NULL	NULL	IPR001881	NULL	ESM1;VWF;FN1;ADAM10;ADAM17;VEGFA;ANGPT1;VEGFC;MMP9;TNF;ANGPT2;EGF;IL17A;CCL2;PDGFB;SHH;CXCL12;FGF2;PGF;EGFL7;CCL25;PLXND1;VEGFB;IL7	DLL4
P53420	COL4A4	COL4A4	0.990586	Yes	secreted	NULL	extracellular space|extracellular matrix organization|extracellular matrix|extracellular region|extracellular matrix structural constituent	GO:0005615|GO:0030198|GO:0031012|GO:0005576|GO:0005201	--	--	--	COL4A4
Q9NZV1	CRIM1	CRIM1 S52 UNQ1886/PRO4330	0.990485	Yes	membrane	NULL	extracellular region	GO:0005576	--	--	--	CRIM1
P14543	NID1	NID1 NID	0.990222	Yes	secreted	isExome	collagen-containing extracellular matrix|extracellular region|extracellular matrix structural constituent|extracellular exosome|extracellular matrix organization	GO:0062023|GO:0005576|GO:0005201|GO:0070062|GO:0030198	--	--	--	NID1
Q9NY15	STAB1	STAB1 FEEL1 KIAA0246	0.989758	No	membrane	NULL	NULL	NULL	IPR001881;IPR000782;IPR002049;IPR000538	NULL	SPARC;C1QA;C1QB;C1QC;F13A1;CLEC10A	STAB1
O00468	AGRN	AGRN AGRIN	0.989455	Yes	membrane&secreted	isExome	collagen-containing extracellular matrix|extracellular region|extracellular exosome|extracellular matrix structural constituent|extracellular matrix organization	GO:0062023|GO:0005576|GO:0070062|GO:0005201|GO:0030198	--	--	--	AGRN
P35443	THBS4	THBS4 TSP4	0.989172	Yes	secreted	isExome	collagen-containing extracellular matrix|extracellular region|extracellular exosome|extracellular space	GO:0062023|GO:0005576|GO:0070062|GO:0005615	--	--	--	THBS4
P78504	JAG1	JAG1 JAGL1	0.989071	No	membrane	isExome	extracellular region	GO:0005576	IPR001881;IPR001007	ADAM17	MFAP5;THBS1;FN1;IBSP;SPP1;ASPN;CTGF;ADAM17;ADAM10;EGF;WNT3A;WNT5A;IL6;BMP4;TNF;WNT1;BMP2;TNFSF11;SHH;GDF2;HGF;FGF1;VEGFA;WNT2;FGF2;LEP;CXCL12;ANGPT1;IL1B;KITLG;EGFL7;WNT4;IHH;BMP7;FGF13;TGFB1;FGF10;FGF20;WNT9B;FGF8;MMP9;WNT3;WNT2B;NRG1;PDGFB;BMP6;DHH;INS	JAG1
P35556	FBN2	FBN2	0.989051	Yes	secreted	isExome	sequestering of TGFbeta in extracellular matrix|collagen-containing extracellular matrix|extracellular region|extracellular matrix structural constituent|extracellular matrix organization|extracellular matrix constituent conferring elasticity|extracellular matrix	GO:0035583|GO:0062023|GO:0005576|GO:0005201|GO:0030198|GO:0030023|GO:0031012	--	--	--	FBN2
O75443	TECTA	TECTA	0.988626	Yes	membrane	isExome	extracellular exosome|collagen-containing extracellular matrix|extracellular region|extracellular matrix structural constituent	GO:0070062|GO:0062023|GO:0005576|GO:0005201	--	--	--	TECTA
Q8TE56	ADAMTS17	ADAMTS17	0.988606	Yes	secreted	NULL	extracellular region	GO:0005576	--	--	--	ADAMTS17
Q01955	COL4A3	COL4A3	0.988485	Yes	secreted	isExome	collagen-containing extracellular matrix|extracellular region|extracellular matrix|extracellular matrix structural constituent conferring tensile strength|extracellular matrix structural constituent|extracellular space|extracellular matrix organization	GO:0062023|GO:0005576|GO:0031012|GO:0030020|GO:0005201|GO:0005615|GO:0030198	--	--	--	COL4A3
P02461	COL3A1	COL3A1	0.98798	Yes	secreted	isExome	collagen-containing extracellular matrix|extracellular region|extracellular matrix|extracellular matrix structural constituent conferring tensile strength|extracellular matrix structural constituent|extracellular space|extracellular matrix organization	GO:0062023|GO:0005576|GO:0031012|GO:0030020|GO:0005201|GO:0005615|GO:0030198	--	--	--	COL3A1
P24821	TNC	TNC HXB	0.987131	Yes	secreted	isExome	collagen-containing extracellular matrix|extracellular region|extracellular matrix structural constituent|extracellular space|extracellular matrix organization|perisynaptic extracellular matrix	GO:0062023|GO:0005576|GO:0005201|GO:0005615|GO:0030198|GO:0098966	--	--	--	TNC
P98160	HSPG2	HSPG2	0.986788	Yes	secreted	isExome	collagen-containing extracellular matrix|extracellular region|extracellular exosome|extracellular matrix structural constituent conferring compression resistance|extracellular space|extracellular matrix organization	GO:0062023|GO:0005576|GO:0070062|GO:0030021|GO:0005615|GO:0030198	--	--	--	HSPG2
P58397	ADAMTS12	ADAMTS12 UNQ1918/PRO4389	0.986747	Yes	secreted	isExome	collagen-containing extracellular matrix	GO:0062023	--	--	--	ADAMTS12
P08123	COL1A2	COL1A2	0.986626	Yes	secreted	isExome	collagen-containing extracellular matrix|extracellular region|extracellular exosome|extracellular matrix|extracellular matrix structural constituent conferring tensile strength|extracellular matrix structural constituent|extracellular space|extracellular matrix organization	GO:0062023|GO:0005576|GO:0070062|GO:0031012|GO:0030020|GO:0005201|GO:0005615|GO:0030198	--	--	--	COL1A2
P08572	COL4A2	COL4A2	0.986626	Yes	secreted	isExome	extracellular matrix structural constituent conferring tensile strength|collagen-containing extracellular matrix|extracellular region|extracellular matrix structural constituent|extracellular space|extracellular exosome|extracellular matrix organization|extracellular matrix	GO:0030020|GO:0062023|GO:0005576|GO:0005201|GO:0005615|GO:0070062|GO:0030198|GO:0031012	--	--	--	COL4A2
Q75N90	FBN3	FBN3 KIAA1776	0.986586	Yes	secreted	isExome	collagen-containing extracellular matrix|extracellular matrix|extracellular matrix structural constituent	GO:0062023|GO:0031012|GO:0005201	--	--	--	FBN3
Q14031	COL4A6	COL4A6	0.986222	Yes	secreted	NULL	extracellular space|extracellular matrix structural constituent conferring tensile strength|collagen-containing extracellular matrix|extracellular matrix organization|extracellular matrix|extracellular region|extracellular matrix structural constituent	GO:0005615|GO:0030020|GO:0062023|GO:0030198|GO:0031012|GO:0005576|GO:0005201	--	--	--	COL4A6
Q9Y6R7	FCGBP	FCGBP	0.986121	No	secreted	isExome	extracellular exosome	GO:0070062	IPR003645;IPR001007;IPR001846	NULL	MEP1B;C1QC;MUC12;MUC17;ITLN2	FCGBP
Q53RD9	FBLN7	FBLN7 TM14	0.985899	Yes	secreted	NULL	extracellular region	GO:0005576	--	--	--	FBLN7
P35555	FBN1	FBN1 FBN	0.985172	Yes	secreted	isExome	sequestering of TGFbeta in extracellular matrix|sequestering of BMP in extracellular matrix|collagen-containing extracellular matrix|extracellular region|extracellular matrix constituent conferring elasticity|extracellular matrix|extracellular matrix structural constituent|extracellular space|extracellular matrix organization	GO:0035583|GO:0035582|GO:0062023|GO:0005576|GO:0030023|GO:0031012|GO:0005201|GO:0005615|GO:0030198	--	--	--	FBN1
Q8N8U9	BMPER	BMPER KIAA1965	0.984869	Yes	secreted	NULL	extracellular space	GO:0005615	--	--	--	BMPER
O95967	EFEMP2	EFEMP2 FBLN4 UNQ200/PRO226	0.984586	Yes	secreted	isExome	extracellular vesicle|extracellular exosome|collagen-containing extracellular matrix|extracellular region|extracellular matrix structural constituent	GO:1903561|GO:0070062|GO:0062023|GO:0005576|GO:0005201	--	--	--	EFEMP2
Q8N2S1	LTBP4	LTBP4	0.983333	Yes	secreted	isExome	collagen-containing extracellular matrix|extracellular region|extracellular matrix structural constituent|extracellular space|extracellular matrix	GO:0062023|GO:0005576|GO:0005201|GO:0005615|GO:0031012	--	--	--	LTBP4
Q9Y219	JAG2	JAG2	0.982889	No	membrane	NULL	NULL	NULL	IPR001881;IPR001007	NULL	ADAM10;ADAM17;BMP4;SHH;EGFL7;EGF;WNT1;BMP2;VEGFA	JAG2
P23142	FBLN1	FBLN1 PP213	0.982586	Yes	secreted	isExome	collagen-containing extracellular matrix|extracellular region|extracellular exosome|extracellular matrix|extracellular matrix structural constituent|extracellular space|extracellular matrix organization	GO:0062023|GO:0005576|GO:0070062|GO:0031012|GO:0005201|GO:0005615|GO:0030198	--	--	--	FBLN1
P02452	COL1A1	COL1A1	0.982384	Yes	secreted	isExome	collagen-containing extracellular matrix|extracellular matrix structural constituent conferring tensile strength|extracellular matrix structural constituent|extracellular region|extracellular matrix|extracellular space|extracellular matrix organization	GO:0062023|GO:0030020|GO:0005201|GO:0005576|GO:0031012|GO:0005615|GO:0030198	--	--	--	COL1A1
O75095	MEGF6	MEGF6 EGFL3 KIAA0815	0.982283	Yes	secreted	NULL	extracellular region	GO:0005576	--	--	--	MEGF6
P12107	COL11A1	COL11A1 COLL6	0.98202	Yes	secreted	isExome	collagen-containing extracellular matrix|extracellular region|extracellular matrix|extracellular matrix structural constituent conferring tensile strength|extracellular matrix structural constituent|extracellular matrix binding|extracellular space|extracellular matrix organization	GO:0062023|GO:0005576|GO:0031012|GO:0030020|GO:0005201|GO:0050840|GO:0005615|GO:0030198	--	--	--	COL11A1
O75445	USH2A	USH2A	0.981293	No	membrane	NULL	NULL	NULL	IPR003961;IPR002049;IPR001791;IPR008211	NULL	LAMA5;LAMA3;LAMB1;LAMB2;IMPG2;EYS;COL4A3;NID1	USH2A
Q9HB63	NTN4	NTN4	0.980667	Yes	secreted	NULL	regulation of branching involved in salivary gland morphogenesis by extracellular matrix-epithelial cell signaling	GO:0060668	--	--	--	NTN4
A2VEC9	SSPO	SSPO KIAA2036	0.980525	Yes	secreted	isExome	extracellular space	GO:0005615	--	--	--	SSPO
A4D0S4	LAMB4	LAMB4	0.980505	Yes	secreted	NULL	NULL	NULL	--	--	--	LAMB4
P59510	ADAMTS20	ADAMTS20	0.979394	Yes	secreted	NULL	extracellular space|collagen-containing extracellular matrix|extracellular matrix organization	GO:0005615|GO:0062023|GO:0030198	--	--	--	ADAMTS20
Q07092	COL16A1	COL16A1 FP1572	0.979374	Yes	secreted	isExome	extracellular matrix structural constituent conferring tensile strength|collagen-containing extracellular matrix|extracellular region|extracellular matrix structural constituent|extracellular space|extracellular matrix organization|extracellular matrix	GO:0030020|GO:0062023|GO:0005576|GO:0005201|GO:0005615|GO:0030198|GO:0031012	--	--	--	COL16A1
Q7Z7M0	MEGF8	MEGF8 C19orf49 EGFL4 KIAA0817	0.978869	Yes	membrane	isExome	extracellular exosome	GO:0070062	--	--	--	MEGF8
P98095	FBLN2	FBLN2	0.978848	Yes	secreted	isExome	extracellular vesicle|extracellular matrix binding|collagen-containing extracellular matrix|extracellular matrix organization|extracellular matrix constituent conferring elasticity|extracellular matrix|extracellular region|extracellular matrix structural constituent	GO:1903561|GO:0050840|GO:0062023|GO:0030198|GO:0030023|GO:0031012|GO:0005576|GO:0005201	--	--	--	FBLN2
Q8NFW1	COL22A1	COL22A1	0.978788	Yes	secreted	NULL	extracellular space|extracellular matrix organization|extracellular matrix|extracellular region|extracellular matrix structural constituent	GO:0005615|GO:0030198|GO:0031012|GO:0005576|GO:0005201	--	--	--	COL22A1
Q07954	LRP1	LRP1 A2MR APR	0.978404	No	membrane&secreted	isExome	regulation of extracellular matrix disassembly	GO:0010715	IPR001881	MBL2;MBL2;MBL2;MBL2;MBL2;FCN2;FCN2	HSPG2;AGRN;THBS1;CTGF;DCN;MFGE8;FN1;LAMA5;LAMA3;PLAT;SERPINE1;HPX;PDGFB;PLAU;SDC1;GPC1;SDC3;A2M;SDC4;SDC2;GPC6;GPC4;GPC3;GPC2;GPC5;MMP9;MDK;FCN2;MBL2;TNF;TIMP1;SFTPD;PLG;MMP14;WNT3A;MMP13;MMP2;SFTPA1;INS;PLXDC1;SERPINE2;F9;ELANE;IL6;CD109	LRP1
Q96HD1	CRELD1	CRELD1 CIRRIN UNQ188/PRO214	0.977172	Yes	membrane&secreted	NULL	collagen-containing extracellular matrix|extracellular matrix structural constituent	GO:0062023|GO:0005201	--	--	--	CRELD1
P02751	FN1	FN1 FN	0.976586	Yes	secreted	isExome	collagen-containing extracellular matrix|extracellular matrix structural constituent|extracellular region|extracellular exosome|extracellular matrix|extracellular space|extracellular matrix organization	GO:0062023|GO:0005201|GO:0005576|GO:0070062|GO:0031012|GO:0005615|GO:0030198	--	--	--	FN1
Q13443	ADAM9	ADAM9 KIAA0021 MCMP MDC9 MLTNG	0.976384	Yes	membrane&secreted	isExome	extracellular exosome|extracellular space	GO:0070062|GO:0005615	--	--	--	ADAM9
P56730	PRSS12	PRSS12	0.976323	Yes	secreted	NULL	NULL	NULL	--	--	--	PRSS12
O00634	NTN3	NTN3 NTN2L	0.976162	Yes	secreted	NULL	extracellular region	GO:0005576	--	--	--	NTN3
O00187	MASP2	MASP2	0.976	Yes	secreted	isExome	extracellular region|extracellular space|extracellular exosome	GO:0005576|GO:0005615|GO:0070062	--	--	--	MASP2
Q8WWQ8	STAB2	STAB2 FEEL2 FELL FEX2 HARE	0.975556	No	membrane	NULL	NULL	NULL	IPR001881;IPR000782;IPR002049;IPR000538	NULL	EGFLAM;MFGE8;HYAL2;CLEC4M	STAB2
Q17RW2	COL24A1	COL24A1	0.975434	Yes	secreted	isExome	extracellular space|extracellular matrix structural constituent conferring tensile strength|collagen-containing extracellular matrix|extracellular matrix organization|extracellular matrix|extracellular region|extracellular matrix structural constituent	GO:0005615|GO:0030020|GO:0062023|GO:0030198|GO:0031012|GO:0005576|GO:0005201	--	--	--	COL24A1
P55268	LAMB2	LAMB2 LAMS	0.975192	Yes	secreted	isExome	collagen-containing extracellular matrix|extracellular region|extracellular exosome|extracellular matrix structural constituent|extracellular matrix organization	GO:0062023|GO:0005576|GO:0070062|GO:0005201|GO:0030198	--	--	--	LAMB2
Q6UXI9	NPNT	NPNT EGFL6L POEM UNQ295/PRO334	0.975051	Yes	secreted	isExome	collagen-containing extracellular matrix|extracellular region|extracellular matrix structural constituent|extracellular exosome|extracellular matrix organization	GO:0062023|GO:0005576|GO:0005201|GO:0070062|GO:0030198	--	--	--	NPNT
Q14993	COL19A1	COL19A1	0.974909	Yes	secreted	NULL	extracellular region|extracellular matrix structural constituent|extracellular space|extracellular matrix organization|extracellular matrix	GO:0005576|GO:0005201|GO:0005615|GO:0030198|GO:0031012	--	--	--	COL19A1
Q86XX4	FRAS1	FRAS1 KIAA1500	0.974727	Yes	membrane&secreted	NULL	collagen-containing extracellular matrix|extracellular matrix structural constituent	GO:0062023|GO:0005201	--	--	--	FRAS1
Q92752	TNR	TNR	0.974364	Yes	secreted	NULL	extracellular region|extracellular matrix organization	GO:0005576|GO:0030198	--	--	--	TNR
P01133	EGF	EGF	0.974202	Yes	membrane	isExome	extracellular region|extracellular exosome|extracellular space	GO:0005576|GO:0070062|GO:0005615	--	--	--	EGF
Q9NS15	LTBP3	LTBP3	0.97404	Yes	secreted	isExome	extracellular exosome|collagen-containing extracellular matrix|extracellular region	GO:0070062|GO:0062023|GO:0005576	--	--	--	LTBP3
Q6ZWJ8	KCP	KCP CRIM2 KCP1	0.97402	Yes	secreted	NULL	extracellular region	GO:0005576	--	--	--	KCP
Q6WN34	CHRDL2	CHRDL2 BNF1 CHL2 UNQ765/PRO1557	0.973394	Yes	secreted	isExome	extracellular space	GO:0005615	--	--	--	CHRDL2
O43184	ADAM12	ADAM12 MLTN UNQ346/PRO545	0.97299	Yes	membrane&secreted	NULL	extracellular region|extracellular matrix organization	GO:0005576|GO:0030198	--	--	--	ADAM12
P22105	TNXB	TNXB HXBL TNX TNXB1 TNXB2 XB	0.97299	Yes	secreted	NULL	collagen-containing extracellular matrix|extracellular region|extracellular matrix structural constituent|extracellular space|extracellular exosome|extracellular matrix	GO:0062023|GO:0005576|GO:0005201|GO:0005615|GO:0070062|GO:0031012	--	--	--	TNXB
P39900	MMP12	MMP12 HME	0.972707	Yes	secreted	NULL	extracellular region|extracellular matrix|extracellular matrix disassembly|extracellular space|extracellular matrix organization	GO:0005576|GO:0031012|GO:0022617|GO:0005615|GO:0030198	--	--	--	MMP12
Q8TE57	ADAMTS16	ADAMTS16 KIAA2029	0.972606	Yes	secreted	NULL	extracellular region	GO:0005576	--	--	--	ADAMTS16
O60882	MMP20	MMP20	0.972505	Yes	secreted	NULL	extracellular matrix disassembly|extracellular region|extracellular space|extracellular matrix organization|extracellular matrix	GO:0022617|GO:0005576|GO:0005615|GO:0030198|GO:0031012	--	--	--	MMP20
Q02388	COL7A1	COL7A1	0.972343	Yes	secreted	isExome	extracellular matrix structural constituent conferring tensile strength|collagen-containing extracellular matrix|extracellular region|extracellular space|extracellular matrix organization|extracellular matrix	GO:0030020|GO:0062023|GO:0005576|GO:0005615|GO:0030198|GO:0031012	--	--	--	COL7A1
P02462	COL4A1	COL4A1	0.971657	Yes	secreted	isExome	extracellular matrix structural constituent conferring tensile strength|collagen-containing extracellular matrix|extracellular region|extracellular matrix structural constituent|extracellular space|extracellular matrix organization|extracellular matrix	GO:0030020|GO:0062023|GO:0005576|GO:0005201|GO:0005615|GO:0030198|GO:0031012	--	--	--	COL4A1
Q12805	EFEMP1	EFEMP1 FBLN3 FBNL	0.971576	Yes	secreted	isExome	collagen-containing extracellular matrix|extracellular region|extracellular matrix structural constituent|extracellular space|extracellular exosome|extracellular matrix	GO:0062023|GO:0005576|GO:0005201|GO:0005615|GO:0070062|GO:0031012	--	--	--	EFEMP1
Q9Y5Y6	ST14	ST14 PRSS14 SNC19 TADG15	0.971253	Yes	membrane	isExome	extracellular space	GO:0005615	--	--	--	ST14
P51512	MMP16	MMP16 C8orf57 MMPX2	0.970646	Yes	membrane	NULL	extracellular matrix disassembly|extracellular space|extracellular matrix organization|extracellular matrix	GO:0022617|GO:0005615|GO:0030198|GO:0031012	--	--	--	MMP16
P82279	CRB1	CRB1	0.970404	No	membrane&secreted	NULL	extracellular region	GO:0005576	IPR001881;IPR001791	NULL	IMPG2;EYS;ADAM10	CRB1
P08709	F7	F7	0.970283	Yes	secreted	isExome	extracellular region|extracellular space	GO:0005576|GO:0005615	--	--	--	F7
P35442	THBS2	THBS2 TSP2	0.97	Yes	secreted	isExome	collagen-containing extracellular matrix|extracellular region|extracellular matrix structural constituent	GO:0062023|GO:0005576|GO:0005201	--	--	--	THBS2
Q96KG7	MEGF10	MEGF10 KIAA1780	0.969697	Yes	membrane&secreted	isExome	NULL	NULL	--	--	--	MEGF10
Q9BU40	CHRDL1	CHRDL1 NRLN1	0.968808	Yes	secreted	NULL	extracellular region	GO:0005576	--	--	--	CHRDL1
Q9UP79	ADAMTS8	ADAMTS8 METH2	0.968444	Yes	secreted	NULL	collagen-containing extracellular matrix	GO:0062023	--	--	--	ADAMTS8
Q14112	NID2	NID2	0.968323	Yes	secreted	isExome	collagen-containing extracellular matrix|extracellular region|extracellular matrix structural constituent|extracellular exosome|extracellular matrix organization	GO:0062023|GO:0005576|GO:0005201|GO:0070062|GO:0030198	--	--	--	NID2
Q99715	COL12A1	COL12A1 COL12A1L	0.968101	Yes	secreted	isExome	extracellular vesicle|extracellular matrix structural constituent conferring tensile strength|collagen-containing extracellular matrix|extracellular region|extracellular space|extracellular exosome|extracellular matrix	GO:1903561|GO:0030020|GO:0062023|GO:0005576|GO:0005615|GO:0070062|GO:0031012	--	--	--	COL12A1
Q6ZRI0	OTOG	OTOG OTGN	0.96802	Yes	secreted	NULL	extracellular space	GO:0005615	--	--	--	OTOG
Q96NU0	CNTNAP3B	CNTNAP3B CASPR3B	0.967778	No	membrane&secreted	NULL	NULL	NULL	IPR002181;IPR001791	NULL	NULL	CNTNAP3B
P08253	MMP2	MMP2 CLG4A	0.967515	Yes	secreted	isExome	collagen-containing extracellular matrix|extracellular region|extracellular matrix disassembly|extracellular space|extracellular matrix organization	GO:0062023|GO:0005576|GO:0022617|GO:0005615|GO:0030198	--	--	--	MMP2
P14780	MMP9	MMP9 CLG4B	0.967495	Yes	secreted	isExome	collagen-containing extracellular matrix|extracellular region|extracellular exosome|extracellular matrix disassembly|extracellular space|extracellular matrix organization	GO:0062023|GO:0005576|GO:0070062|GO:0022617|GO:0005615|GO:0030198	--	--	--	MMP9
Q14766	LTBP1	LTBP1	0.967152	Yes	secreted	isExome	sequestering of TGFbeta in extracellular matrix|collagen-containing extracellular matrix|extracellular region|extracellular matrix structural constituent|extracellular matrix	GO:0035583|GO:0062023|GO:0005576|GO:0005201|GO:0031012	--	--	--	LTBP1
P50281	MMP14	MMP14	0.966889	Yes	membrane&secreted	isExome	extracellular matrix|extracellular matrix disassembly|extracellular space|extracellular matrix organization	GO:0031012|GO:0022617|GO:0005615|GO:0030198	--	--	--	MMP14
P25067	COL8A2	COL8A2	0.966667	Yes	secreted	NULL	extracellular matrix structural constituent conferring tensile strength|collagen-containing extracellular matrix|extracellular region|extracellular matrix structural constituent|extracellular space|extracellular matrix organization|extracellular matrix	GO:0030020|GO:0062023|GO:0005576|GO:0005201|GO:0005615|GO:0030198|GO:0031012	--	--	--	COL8A2
P25391	LAMA1	LAMA1 LAMA	0.965879	Yes	secreted	isExome	collagen-containing extracellular matrix|extracellular region|extracellular matrix|extracellular matrix structural constituent|extracellular space|extracellular matrix organization	GO:0062023|GO:0005576|GO:0031012|GO:0005201|GO:0005615|GO:0030198	--	--	--	LAMA1
Q5TAT6	COL13A1	COL13A1	0.965758	Yes	membrane	NULL	extracellular matrix structural constituent conferring tensile strength|collagen-containing extracellular matrix|extracellular region|extracellular matrix structural constituent|extracellular space|extracellular matrix organization|extracellular matrix	GO:0030020|GO:0062023|GO:0005576|GO:0005201|GO:0005615|GO:0030198|GO:0031012	--	--	--	COL13A1
Q05707	COL14A1	COL14A1 UND	0.965758	Yes	secreted	isExome	extracellular matrix structural constituent conferring tensile strength|collagen-containing extracellular matrix|extracellular region|extracellular matrix structural constituent|extracellular space|extracellular matrix organization|extracellular matrix	GO:0030020|GO:0062023|GO:0005576|GO:0005201|GO:0005615|GO:0030198|GO:0031012	--	--	--	COL14A1
P29400	COL4A5	COL4A5	0.965616	Yes	secreted	NULL	extracellular space|extracellular matrix structural constituent conferring tensile strength|collagen-containing extracellular matrix|extracellular matrix organization|extracellular matrix|extracellular region|extracellular matrix structural constituent	GO:0005615|GO:0030020|GO:0062023|GO:0030198|GO:0031012|GO:0005576|GO:0005201	--	--	--	COL4A5
Q9P2N4	ADAMTS9	ADAMTS9 KIAA1312	0.965313	Yes	secreted	NULL	collagen-containing extracellular matrix|extracellular space|extracellular matrix organization|extracellular matrix	GO:0062023|GO:0005615|GO:0030198|GO:0031012	--	--	--	ADAMTS9
O15072	ADAMTS3	ADAMTS3 KIAA0366	0.965111	Yes	secreted	isExome	collagen-containing extracellular matrix|extracellular region|extracellular space|extracellular exosome|extracellular matrix	GO:0062023|GO:0005576|GO:0005615|GO:0070062|GO:0031012	--	--	--	ADAMTS3
Q9BZ76	CNTNAP3	CNTNAP3 CASPR3 KIAA1714	0.964848	No	membrane&secreted	NULL	extracellular region	GO:0005576	IPR002181;IPR001791	NULL	NULL	CNTNAP3
P08254	MMP3	MMP3 STMY1	0.964768	Yes	secreted	isExome	extracellular matrix disassembly|extracellular region|extracellular space|extracellular matrix organization|extracellular matrix	GO:0022617|GO:0005576|GO:0005615|GO:0030198|GO:0031012	--	--	--	MMP3
P39059	COL15A1	COL15A1	0.964424	Yes	secreted	isExome	extracellular matrix structural constituent conferring tensile strength|collagen-containing extracellular matrix|extracellular region|extracellular matrix structural constituent|extracellular space|extracellular exosome|extracellular matrix organization|extracellular matrix	GO:0030020|GO:0062023|GO:0005576|GO:0005201|GO:0005615|GO:0070062|GO:0030198|GO:0031012	--	--	--	COL15A1
P46531	NOTCH1	NOTCH1 TAN1	0.964303	No	membrane	isExome	negative regulation of extracellular matrix constituent secretion|extracellular region|regulation of extracellular matrix assembly	GO:0003332|GO:0005576|GO:1901201	IPR001881	HCFC1	MFAP2;MFAP5;NOV;CTGF;FN1;POSTN;WISP1;THBS2;COL5A1;SPP1;ELN;RSPO1;THBS1;BGLAP;VWF;RELN;COL1A1;ADAM10;ADAM17;PLXND1;VEGFA;FGF2;IL6;SHH;WNT2;TNF;WNT5A;FGF13;BMP4;MMP9;IGF1;WNT4;WNT1;LOX;BMP2;ANGPT2;WNT3A;IL10;IL4;MMP14;IL17A;TGFB1;NRG1;EPO;LGALS4;INS;WNT2B;GDF2;LEP;CCL2;FGF8;PDGFD;MMP7;CXCL12;FGF20;IHH;SDC1;LGALS3;WNT3;IFNG;SERPINE1;FGF10;FGF3;FGF4;HGF;BMP7;SDC3;KITLG;ANGPTL4;ANGPT1;WNT9B;MMP2;WNT7A…	NOTCH1
P20849	COL9A1	COL9A1	0.964303	Yes	secreted	NULL	extracellular space|extracellular matrix structural constituent conferring tensile strength|extracellular matrix organization|extracellular matrix|extracellular region|extracellular matrix structural constituent	GO:0005615|GO:0030020|GO:0030198|GO:0031012|GO:0005576|GO:0005201	--	--	--	COL9A1
O75173	ADAMTS4	ADAMTS4 KIAA0688 UNQ769/PRO1563	0.963515	Yes	membrane	NULL	extracellular matrix disassembly|collagen-containing extracellular matrix|extracellular region|extracellular space	GO:0022617|GO:0062023|GO:0005576|GO:0005615	--	--	--	ADAMTS4
A6BM72	MEGF11	MEGF11 KIAA1781 UNQ1949/PRO4432	0.962788	Yes	membrane	NULL	NULL	NULL	--	--	--	MEGF11
Q2UY09	COL28A1	COL28A1 COL28	0.962768	Yes	secreted	NULL	extracellular matrix structural constituent conferring tensile strength|collagen-containing extracellular matrix|extracellular region|extracellular matrix structural constituent|extracellular space|extracellular matrix organization|extracellular matrix	GO:0030020|GO:0062023|GO:0005576|GO:0005201|GO:0005615|GO:0030198|GO:0031012	--	--	--	COL28A1
P00748	F12	F12	0.962525	Yes	secreted	NULL	extracellular region|extracellular space|extracellular exosome	GO:0005576|GO:0005615|GO:0070062	--	--	--	F12
Q9UNA0	ADAMTS5	ADAMTS5 ADAMTS11 ADMP2	0.962323	Yes	secreted	NULL	extracellular matrix disassembly|collagen-containing extracellular matrix|extracellular region|extracellular matrix binding|extracellular space|extracellular matrix	GO:0022617|GO:0062023|GO:0005576|GO:0050840|GO:0005615|GO:0031012	--	--	--	ADAMTS5
Q76LX8	ADAMTS13	ADAMTS13 C9orf8 UNQ6102/PRO20085	0.962162	Yes	secreted	isExome	extracellular space|extracellular matrix	GO:0005615|GO:0031012	--	--	--	ADAMTS13
P12110	COL6A2	COL6A2	0.961778	Yes	secreted	isExome	extracellular vesicle|extracellular matrix structural constituent conferring tensile strength|collagen-containing extracellular matrix|extracellular region|extracellular space|extracellular exosome|extracellular matrix organization|extracellular matrix	GO:1903561|GO:0030020|GO:0062023|GO:0005576|GO:0005615|GO:0070062|GO:0030198|GO:0031012	--	--	--	COL6A2
Q9C0A0	CNTNAP4	CNTNAP4 CASPR4 KIAA1763	0.961717	No	membrane	isExome	NULL	NULL	IPR002181;IPR001791	NULL	HAPLN2	CNTNAP4
P78539	SRPX	SRPX ETX1	0.961394	Yes	secreted	isExome	NULL	NULL	--	--	--	SRPX
O15230	LAMA5	LAMA5 KIAA0533 KIAA1907	0.961253	Yes	secreted	isExome	collagen-containing extracellular matrix|extracellular region|extracellular exosome|extracellular matrix structural constituent|extracellular space|extracellular matrix organization	GO:0062023|GO:0005576|GO:0070062|GO:0005201|GO:0005615|GO:0030198	--	--	--	LAMA5
Q9BXS0	COL25A1	COL25A1	0.961051	Yes	membrane	NULL	extracellular region|extracellular matrix structural constituent|extracellular space|extracellular matrix organization|extracellular matrix	GO:0005576|GO:0005201|GO:0005615|GO:0030198|GO:0031012	--	--	--	COL25A1
Q9NYJ7	DLL3	DLL3	0.960646	No	membrane&secreted	NULL	NULL	NULL	IPR001881	NULL	ADAM17;EGF;SHH	DLL3
Q04721	NOTCH2	NOTCH2	0.960525	No	membrane	isExome	extracellular region	GO:0005576	IPR001881	EGLN3;ST14;ITIH5;IL24;CST6	ADAM10;MDK;ADAM17;WNT1;EGFL7;WNT3A;ADAMTS9;SHH;ADAM30;BMP4;BMP2;WNT4;LEP;VEGFA;WNT5A;IL19;WNT9B	NOTCH2
Q9UGM3	DMBT1	DMBT1 GP340	0.960465	Yes	secreted	isExome	extracellular region|extracellular exosome|extracellular matrix|extracellular space	GO:0005576|GO:0070062|GO:0031012|GO:0005615	--	--	--	DMBT1
Q8N6G6	ADAMTSL1	ADAMTSL1 ADAMTSR1 C9orf94 UNQ528/PRO1071	0.960162	Yes	secreted	NULL	extracellular region	GO:0005576	--	--	--	ADAMTSL1
Q9H013	ADAM19	ADAM19 MLTNB FKSG34	0.960121	Yes	membrane	NULL	collagen-containing extracellular matrix|extracellular matrix organization	GO:0062023|GO:0030198	--	--	--	ADAM19
P49747	COMP	COMP	0.959939	Yes	secreted	isExome	collagen-containing extracellular matrix|extracellular region|extracellular exosome|extracellular matrix|extracellular matrix structural constituent|extracellular space|extracellular matrix organization	GO:0062023|GO:0005576|GO:0070062|GO:0031012|GO:0005201|GO:0005615|GO:0030198	--	--	--	COMP
Q9H3S1	SEMA4A	SEMA4A SEMAB SEMB UNQ783/PRO1317	0.959717	Yes	membrane&secreted	NULL	extracellular space	GO:0005615	--	--	--	SEMA4A
P08861	CELA3B	CELA3B ELA3B	0.959414	Yes	secreted	NULL	extracellular space	GO:0005615	--	--	--	CELA3B
Q9UBX5	FBLN5	FBLN5 DANCE UNQ184/PRO210	0.959394	Yes	secreted	NULL	collagen-containing extracellular matrix|extracellular region|extracellular space|extracellular exosome|extracellular matrix organization|extracellular matrix constituent conferring elasticity|extracellular matrix	GO:0062023|GO:0005576|GO:0005615|GO:0070062|GO:0030198|GO:0030023|GO:0031012	--	--	--	FBLN5
P22894	MMP8	MMP8 CLG1	0.95901	Yes	secreted	NULL	collagen-containing extracellular matrix|extracellular region|extracellular matrix disassembly|extracellular space|extracellular matrix organization	GO:0062023|GO:0005576|GO:0022617|GO:0005615|GO:0030198	--	--	--	MMP8
Q9NPA2	MMP25	MMP25 MMP20 MMPL1 MT6MMP	0.958828	Yes	secreted	isExome	extracellular space|extracellular matrix organization|extracellular matrix	GO:0005615|GO:0030198|GO:0031012	--	--	--	MMP25
Q14050	COL9A3	COL9A3	0.958808	Yes	secreted	NULL	extracellular space|extracellular matrix structural constituent conferring tensile strength|extracellular matrix organization|extracellular matrix|extracellular region|extracellular matrix structural constituent	GO:0005615|GO:0030020|GO:0030198|GO:0031012|GO:0005576|GO:0005201	--	--	--	COL9A3
Q14767	LTBP2	LTBP2 C14orf141 LTBP3	0.958646	Yes	secreted	isExome	collagen-containing extracellular matrix|extracellular region|extracellular matrix structural constituent|extracellular space|extracellular exosome|extracellular matrix	GO:0062023|GO:0005576|GO:0005201|GO:0005615|GO:0070062|GO:0031012	--	--	--	LTBP2
Q96DN2	VWCE	VWCE URG11	0.958505	Yes	secreted	NULL	extracellular region	GO:0005576	--	--	--	VWCE
Q5VWW1	C1QL3	C1QL3 CTRP13	0.958444	Yes	secreted	NULL	extracellular region	GO:0005576	--	--	--	C1QL3
Q9Y6N6	LAMC3	LAMC3	0.958303	Yes	secreted	NULL	extracellular matrix organization|extracellular matrix|extracellular region	GO:0030198|GO:0031012|GO:0005576	--	--	--	LAMC3
Q96CW9	NTNG2	NTNG2 KIAA1857 LMNT2 UNQ9381/PRO34206	0.958242	Yes	secreted	NULL	extracellular region	GO:0005576	--	--	--	NTNG2
Q96JB6	LOXL4	LOXL4 LOXC	0.958242	Yes	secreted	isExome	extracellular space|extracellular exosome	GO:0005615|GO:0070062	--	--	--	LOXL4
P78325	ADAM8	ADAM8 MS2	0.958162	Yes	membrane&secreted	NULL	extracellular matrix disassembly	GO:0022617	--	--	--	ADAM8
Q9NS98	SEMA3G	SEMA3G	0.958101	Yes	secreted	isExome	extracellular space|extracellular exosome	GO:0005615|GO:0070062	--	--	--	SEMA3G
P08218	CELA2B	CELA2B ELA2B	0.958	Yes	secreted	NULL	extracellular space|extracellular region	GO:0005615|GO:0005576	--	--	--	CELA2B
O95428	PAPLN	PAPLN UNQ2420/PRO4977	0.957919	Yes	secreted	NULL	extracellular region	GO:0005576	--	--	--	PAPLN
Q16787	LAMA3	LAMA3 LAMNA	0.957111	Yes	secreted	isExome	collagen-containing extracellular matrix|extracellular region|extracellular matrix structural constituent|extracellular exosome|extracellular matrix organization	GO:0062023|GO:0005576|GO:0005201|GO:0070062|GO:0030198	--	--	--	LAMA3
Q13444	ADAM15	ADAM15 MDC15	0.956384	Yes	membrane&secreted	isExome	extracellular exosome|extracellular matrix disassembly|extracellular matrix organization	GO:0070062|GO:0022617|GO:0030198	--	--	--	ADAM15
Q99542	MMP19	MMP19 MMP18 RASI	0.956202	Yes	secreted	NULL	extracellular matrix disassembly|extracellular region|extracellular space|extracellular matrix organization|extracellular matrix	GO:0022617|GO:0005576|GO:0005615|GO:0030198|GO:0031012	--	--	--	MMP19
Q13275	SEMA3F	SEMA3F	0.956162	Yes	secreted	isExome	extracellular space	GO:0005615	--	--	--	SEMA3F
Q8TE60	ADAMTS18	ADAMTS18 ADAMTS21	0.956141	Yes	secreted	NULL	extracellular region	GO:0005576	--	--	--	ADAMTS18
P12109	COL6A1	COL6A1	0.955737	Yes	secreted	isExome	extracellular matrix structural constituent conferring tensile strength|collagen-containing extracellular matrix|extracellular region|extracellular space|extracellular exosome|extracellular matrix organization|extracellular matrix	GO:0030020|GO:0062023|GO:0005576|GO:0005615|GO:0070062|GO:0030198|GO:0031012	--	--	--	COL6A1
P23352	ANOS1	ANOS1 ADMLX KAL KAL1 KALIG1	0.955434	Yes	secreted	NULL	extracellular region|extracellular matrix structural constituent|extracellular space|extracellular matrix	GO:0005576|GO:0005201|GO:0005615|GO:0031012	--	--	--	ANOS1
Q9UKP5	ADAMTS6	ADAMTS6	0.955434	Yes	secreted	NULL	extracellular region	GO:0005576	--	--	--	ADAMTS6
O15232	MATN3	MATN3	0.955273	Yes	secreted	NULL	extracellular space|extracellular matrix organization|extracellular matrix|extracellular region|extracellular matrix structural constituent	GO:0005615|GO:0030198|GO:0031012|GO:0005576|GO:0005201	--	--	--	MATN3
P12111	COL6A3	COL6A3	0.954667	Yes	secreted	isExome	extracellular vesicle|extracellular matrix structural constituent conferring tensile strength|collagen-containing extracellular matrix|extracellular region|extracellular space|extracellular exosome|extracellular matrix organization|extracellular matrix	GO:1903561|GO:0030020|GO:0062023|GO:0005576|GO:0005615|GO:0070062|GO:0030198|GO:0031012	--	--	--	COL6A3
Q9H3T2	SEMA6C	SEMA6C KIAA1869 SEMAY	0.954586	Yes	membrane&secreted	NULL	extracellular space	GO:0005615	--	--	--	SEMA6C
Q86TH1	ADAMTSL2	ADAMTSL2 KIAA0605	0.954081	Yes	secreted	NULL	extracellular matrix organization|extracellular matrix	GO:0030198|GO:0031012	--	--	--	ADAMTSL2
Q96P44	COL21A1	COL21A1 COL1AL FP633	0.953677	Yes	secreted	isExome	extracellular space|extracellular matrix structural constituent conferring tensile strength|collagen-containing extracellular matrix|extracellular matrix|extracellular region	GO:0005615|GO:0030020|GO:0062023|GO:0031012|GO:0005576	--	--	--	COL21A1
Q63HQ2	EGFLAM	EGFLAM AGRINL AGRNL PIKA	0.953596	Yes	secreted	NULL	extracellular matrix organization	GO:0030198	--	--	--	EGFLAM
P26927	MST1	MST1 D3F15S2 DNF15S2 HGFL	0.953333	Yes	secreted	NULL	extracellular space|extracellular region	GO:0005615|GO:0005576	--	--	--	MST1
P58215	LOXL3	LOXL3 LOXL	0.953253	Yes	secreted	NULL	extracellular region|extracellular space	GO:0005576|GO:0005615	--	--	--	LOXL3
Q8WYK1	CNTNAP5	CNTNAP5 CASPR5	0.95301	No	membrane	NULL	NULL	NULL	IPR002181;IPR001791	NULL	NULL	CNTNAP5
Q9UQP3	TNN	TNN TNW	0.952687	Yes	secreted	NULL	extracellular matrix	GO:0031012	--	--	--	TNN
Q9UM47	NOTCH3	NOTCH3	0.952525	No	membrane&secreted	NULL	extracellular region	GO:0005576	IPR001881	FBLN1;EGLN3	THBS2;IGFBP5;COL4A1;ADAM10;PLXND1;EGF;ADAM17;EGFL7;VEGFA;SHH;WNT1;ANGPT2;BMP4;HTRA1;BMP2;CST3;LEP;WNT16;WNT5A	NOTCH3
Q9H239	MMP28	MMP28 MMP25 UNQ1893/PRO4339	0.952364	Yes	secreted	NULL	extracellular space|collagen-containing extracellular matrix|extracellular matrix organization|extracellular matrix	GO:0005615|GO:0062023|GO:0030198|GO:0031012	--	--	--	MMP28
P07942	LAMB1	LAMB1	0.952263	Yes	secreted	isExome	collagen-containing extracellular matrix|extracellular region|extracellular exosome|extracellular matrix structural constituent|extracellular space|extracellular matrix organization	GO:0062023|GO:0005576|GO:0070062|GO:0005201|GO:0005615|GO:0030198	--	--	--	LAMB1
Q9HC84	MUC5B	MUC5B MUC5	0.952222	Yes	secreted	NULL	extracellular space|extracellular exosome	GO:0005615|GO:0070062	--	--	--	MUC5B
Q9P0K1	ADAM22	ADAM22 MDC2	0.952061	Yes	membrane&secreted	NULL	NULL	NULL	--	--	--	ADAM22
Q6PEZ8	PODNL1	PODNL1 SLRR5B	0.951899	Yes	secreted	NULL	collagen-containing extracellular matrix	GO:0062023	--	--	--	PODNL1
Q9UKZ9	PCOLCE2	PCOLCE2 PCPE2 UNQ250/PRO287	0.951838	Yes	secreted	NULL	extracellular region	GO:0005576	--	--	--	PCOLCE2
P80370	DLK1	DLK1 DLK	0.951051	No	membrane&secreted	NULL	extracellular space	GO:0005615	IPR001881	NULL	FN1;ADIPOQ;IGFBP1;IGF2;MMP9;EGF;INS;LEP;GPC3	DLK1
P03956	MMP1	MMP1 CLG	0.951051	Yes	secreted	isExome	extracellular matrix disassembly|extracellular region|extracellular space|extracellular matrix organization|extracellular matrix	GO:0022617|GO:0005576|GO:0005615|GO:0030198|GO:0031012	--	--	--	MMP1
P09238	MMP10	MMP10 STMY2	0.951051	Yes	secreted	isExome	extracellular space|extracellular matrix disassembly|extracellular matrix organization|extracellular matrix|extracellular region	GO:0005615|GO:0022617|GO:0030198|GO:0031012|GO:0005576	--	--	--	MMP10
Q5VY43	PEAR1	PEAR1 MEGF12	0.950788	No	membrane&secreted	isExome	NULL	NULL	IPR011489;IPR002049	NULL	NULL	PEAR1
Q9GZM7	TINAGL1	TINAGL1 GIS5 LCN7 OLRG2 TINAGL PP6614 PSEC0088 UNQ204/PRO230	0.950646	Yes	secreted	isExome	collagen-containing extracellular matrix|extracellular region|extracellular matrix structural constituent|extracellular space|extracellular exosome	GO:0062023|GO:0005576|GO:0005201|GO:0005615|GO:0070062	--	--	--	TINAGL1
Q9Y4K0	LOXL2	LOXL2	0.950626	Yes	secreted	isExome	collagen-containing extracellular matrix|extracellular space	GO:0062023|GO:0005615	--	--	--	LOXL2
Q9Y215	COLQ	COLQ	0.950525	Yes	secreted	NULL	extracellular matrix structural constituent|extracellular space|extracellular matrix organization|extracellular matrix	GO:0005201|GO:0005615|GO:0030198|GO:0031012	--	--	--	COLQ
Q8NFT8	DNER	DNER BET UNQ262/PRO299	0.95004	No	membrane	NULL	NULL	NULL	IPR001881	NULL	LGI1;MFAP2	DNER
O14672	ADAM10	ADAM10 KUZ MADM	0.949798	Yes	membrane&secreted	isExome	extracellular exosome|extracellular matrix disassembly	GO:0070062|GO:0022617	--	--	--	ADAM10
Q3ZCN5	OTOGL	OTOGL C12orf64	0.949374	No	secreted	NULL	extracellular region	GO:0005576	IPR001007;IPR001846	NULL	OTOL1;TECTB;TSPEAR;EPYC;COCH;MUC4;MASP1;MEGF10	OTOGL
P21810	BGN	BGN SLRR1A	0.948545	Yes	secreted	isExome	collagen-containing extracellular matrix|extracellular region|extracellular matrix structural constituent|extracellular matrix binding|extracellular exosome|extracellular matrix organization|extracellular matrix structural constituent conferring compression resistance|extracellular matrix	GO:0062023|GO:0005576|GO:0005201|GO:0050840|GO:0070062|GO:0030198|GO:0030021|GO:0031012	--	--	--	BGN
Q03692	COL10A1	COL10A1	0.948545	Yes	secreted	NULL	extracellular space|extracellular matrix structural constituent conferring tensile strength|collagen-containing extracellular matrix|extracellular matrix organization|extracellular matrix|extracellular region|extracellular matrix structural constituent	GO:0005615|GO:0030020|GO:0062023|GO:0030198|GO:0031012|GO:0005576|GO:0005201	--	--	--	COL10A1
Q7Z5L3	C1QL2	C1QL2 CTRP10	0.948303	Yes	secreted	NULL	extracellular region	GO:0005576	--	--	--	C1QL2
P05160	F13B	F13B	0.948182	Yes	secreted	NULL	extracellular region	GO:0005576	--	--	--	F13B
Q9UHF1	EGFL7	EGFL7 MEGF7 UNQ187/PRO1449	0.947818	Yes	secreted	isExome	collagen-containing extracellular matrix|extracellular region|extracellular space	GO:0062023|GO:0005576|GO:0005615	--	--	--	EGFL7
O00622	CYR61	CYR61 CCN1 GIG1 IGFBP10	0.947636	Yes	secreted	isExome	collagen-containing extracellular matrix|extracellular matrix|extracellular matrix structural constituent|extracellular matrix binding|extracellular matrix organization	GO:0062023|GO:0031012|GO:0005201|GO:0050840|GO:0030198	--	--	--	CYR61
Q9UHC6	CNTNAP2	CNTNAP2 CASPR2 KIAA0868	0.947455	No	membrane&secreted	NULL	NULL	NULL	IPR002181;IPR001791	NULL	LGI1;SRPX2;RELN;GLDN;ADAM22;ADAM23;ADAM28	CNTNAP2
Q6UXH9	PAMR1	PAMR1 RAMP FP938 UNQ699/PRO1344	0.947071	Yes	secreted	isExome	extracellular region	GO:0005576	--	--	--	PAMR1
A5D8T8	CLEC18A	CLEC18A MRLP2	0.946869	Yes	secreted	NULL	extracellular space	GO:0005615	--	--	--	CLEC18A
Q9NZR2	LRP1B	LRP1B LRPDIT	0.946626	No	membrane&secreted	isExome	NULL	NULL	IPR001881	NULL	LAMA3;LAMA5;PLAT;SERPINE1	LRP1B
P24347	MMP11	MMP11 STMY3	0.946626	Yes	secreted	NULL	extracellular matrix disassembly|extracellular region|extracellular space|extracellular matrix organization|extracellular matrix	GO:0022617|GO:0005576|GO:0005615|GO:0030198|GO:0031012	--	--	--	MMP11
P24043	LAMA2	LAMA2 LAMM	0.946384	Yes	secreted	NULL	collagen-containing extracellular matrix|extracellular region|extracellular matrix structural constituent|extracellular matrix organization	GO:0062023|GO:0005576|GO:0005201|GO:0030198	--	--	--	LAMA2
P02790	HPX	HPX	0.946	Yes	secreted	isExome	collagen-containing extracellular matrix|extracellular region|extracellular space|extracellular exosome	GO:0062023|GO:0005576|GO:0005615|GO:0070062	--	--	--	HPX
Q5T1H1	EYS	EYS C6orf178 C6orf179 C6orf180 EGFL10 EGFL11 SPAM UNQ9424/PRO34591	0.945838	Yes	intracellular	isExome	extracellular exosome	GO:0070062	--	--	--	EYS
Q96A83	COL26A1	COL26A1 EMID2 EMU2	0.945818	Yes	secreted	NULL	collagen-containing extracellular matrix|extracellular matrix|extracellular region	GO:0062023|GO:0031012|GO:0005576	--	--	--	COL26A1
P27658	COL8A1	COL8A1 C3orf7	0.945172	Yes	secreted	NULL	extracellular matrix structural constituent conferring tensile strength|collagen-containing extracellular matrix|extracellular region|extracellular matrix structural constituent|extracellular space|extracellular matrix organization|extracellular matrix	GO:0030020|GO:0062023|GO:0005576|GO:0005201|GO:0005615|GO:0030198|GO:0031012	--	--	--	COL8A1
O43897	TLL1	TLL1 TLL	0.944949	Yes	intracellular	NULL	extracellular matrix disassembly|extracellular region	GO:0022617|GO:0005576	--	--	--	TLL1
Q7Z407	CSMD3	CSMD3 KIAA1894	0.944525	No	membrane	NULL	NULL	NULL	IPR000859;IPR000436	NULL	ANXA13;GDF6;GPC6;GPC4	CSMD3
Q9Y5Q5	CORIN	CORIN CRN TMPRSS10	0.944121	No	membrane	NULL	extracellular region	GO:0005576	NULL	NULL	WNT11;PCSK6;WNT1	CORIN
Q14055	COL9A2	COL9A2	0.944081	Yes	secreted	NULL	extracellular space|extracellular matrix structural constituent conferring tensile strength|extracellular matrix organization|extracellular matrix|extracellular region|extracellular matrix structural constituent	GO:0005615|GO:0030020|GO:0030198|GO:0031012|GO:0005576|GO:0005201	--	--	--	COL9A2
O75882	ATRN	ATRN KIAA0548 MGCA	0.943697	No	membrane	isExome	extracellular space|extracellular exosome	GO:0005615|GO:0070062	IPR001304;IPR000859;IPR002049	NULL	CLEC3B;ANGPTL7;ADAM17;CPN2	ATRN
P29622	SERPINA4	SERPINA4 KST PI4	0.943636	Yes	secreted	isExome	extracellular space|extracellular exosome|extracellular region	GO:0005615|GO:0070062|GO:0005576	--	--	--	SERPINA4
Q9Y2I2	NTNG1	NTNG1 KIAA0976 LMNT1 UNQ571/PRO1133	0.943535	Yes	secreted	NULL	extracellular region	GO:0005576	--	--	--	NTNG1
Q92854	SEMA4D	SEMA4D C9orf164 CD100 SEMAJ	0.943354	Yes	membrane&secreted	NULL	extracellular space	GO:0005615	--	--	--	SEMA4D
Q86Y22	COL23A1	COL23A1	0.943293	Yes	intracellular	NULL	extracellular space|extracellular matrix organization|extracellular matrix|extracellular matrix structural constituent	GO:0005615|GO:0030198|GO:0031012|GO:0005201	--	--	--	COL23A1
P78357	CNTNAP1	CNTNAP1 CASPR NRXN4	0.943212	No	membrane	NULL	NULL	NULL	IPR002181;IPR001791	NULL	GLDN;HAPLN2;SNED1;BCAN	CNTNAP1
Q9NR16	CD163L1	CD163L1 CD163B M160 UNQ6434/PRO23202	0.943111	No	membrane	isExome	extracellular region	GO:0005576	NULL	NULL	NULL	CD163L1
Q14393	GAS6	GAS6 AXLLG	0.943071	Yes	secreted	isExome	extracellular matrix assembly|extracellular region|extracellular exosome|extracellular space	GO:0085029|GO:0005576|GO:0070062|GO:0005615	--	--	--	GAS6
Q6ZMP0	THSD4	THSD4 UNQ9334/PRO34005	0.942364	Yes	membrane&secreted	isExome	extracellular exosome|collagen-containing extracellular matrix|extracellular matrix structural constituent	GO:0070062|GO:0062023|GO:0005201	--	--	--	THSD4
Q9Y6L7	TLL2	TLL2 KIAA0932	0.942263	Yes	secreted	NULL	extracellular matrix disassembly|extracellular region	GO:0022617|GO:0005576	--	--	--	TLL2
Q9P283	SEMA5B	SEMA5B KIAA1445 SEMAG UNQ5867/PRO34001	0.942242	Yes	membrane	NULL	NULL	NULL	--	--	--	SEMA5B
A6NHN0	OTOL1	OTOL1	0.942182	Yes	secreted	NULL	extracellular space|extracellular matrix organization|extracellular matrix|extracellular region|extracellular matrix structural constituent	GO:0005615|GO:0030198|GO:0031012|GO:0005576|GO:0005201	--	--	--	OTOL1
O95388	WISP1	WISP1 CCN4	0.942081	Yes	secreted	NULL	extracellular space|extracellular matrix	GO:0005615|GO:0031012	--	--	--	WISP1
Q9BXJ0	C1QTNF5	C1QTNF5 CTRP5 UNQ303/PRO344	0.941838	Yes	secreted	NULL	extracellular space	GO:0005615	--	--	--	C1QTNF5
Q8IZC6	COL27A1	COL27A1 KIAA1870	0.941657	Yes	secreted	NULL	extracellular space|extracellular matrix structural constituent conferring tensile strength|collagen-containing extracellular matrix|extracellular matrix organization|extracellular matrix|extracellular region|extracellular matrix structural constituent	GO:0005615|GO:0030020|GO:0062023|GO:0030198|GO:0031012|GO:0005576|GO:0005201	--	--	--	COL27A1
Q15848	ADIPOQ	ADIPOQ ACDC ACRP30 APM1 GBP28	0.941374	Yes	secreted	NULL	collagen-containing extracellular matrix|extracellular matrix structural constituent|extracellular region|extracellular space	GO:0062023|GO:0005201|GO:0005576|GO:0005615	--	--	--	ADIPOQ
O75462	CRLF1	CRLF1 UNQ288/PRO327	0.941172	Yes	secreted	NULL	extracellular region|extracellular space	GO:0005576|GO:0005615	--	--	--	CRLF1
Q99435	NELL2	NELL2 NRP2	0.941071	Yes	membrane&secreted	NULL	extracellular region	GO:0005576	--	--	--	NELL2
Q99466	NOTCH4	NOTCH4 INT3	0.940929	No	membrane	NULL	extracellular region	GO:0005576	IPR001881	NULL	VWF;TNXB;ADAM10;ADAM17;VEGFA;EGFL7	NOTCH4
Q8IWY4	SCUBE1	SCUBE1	0.940182	Yes	secreted	NULL	extracellular matrix disassembly|extracellular space	GO:0022617|GO:0005615	--	--	--	SCUBE1
Q6W4X9	MUC6	MUC6	0.939333	Yes	secreted	isExome	extracellular region|extracellular matrix structural constituent	GO:0005576|GO:0005201	--	--	--	MUC6
Q9H0B8	CRISPLD2	CRISPLD2 CRISP11 LCRISP2 UNQ2914/PRO1156/PRO9783	0.939313	Yes	secreted	NULL	extracellular region|extracellular space|extracellular exosome|extracellular matrix organization|extracellular matrix	GO:0005576|GO:0005615|GO:0070062|GO:0030198|GO:0031012	--	--	--	CRISPLD2
P48745	NOV	NOV CCN3 IGFBP9 NOVH	0.939273	Yes	secreted	NULL	collagen-containing extracellular matrix|extracellular region|extracellular matrix	GO:0062023|GO:0005576|GO:0031012	--	--	--	NOV
O00548	DLL1	DLL1 UNQ146/PRO172	0.938768	No	membrane&secreted	NULL	extracellular region	GO:0005576	IPR001881	NULL	NOV;ADAM10;ADAM17;ADAM12;IL7;FLT3LG;SHH;VEGFA;WNT3A;INS;KITLG;FGF8;BMP4;FGF2	DLL1
Q99985	SEMA3C	SEMA3C SEMAE	0.937899	Yes	secreted	isExome	extracellular exosome|extracellular space	GO:0070062|GO:0005615	--	--	--	SEMA3C
A8K2U0	A2ML1	A2ML1 CPAMD9	0.937717	Yes	secreted	isExome	extracellular space|extracellular exosome	GO:0005615|GO:0070062	--	--	--	A2ML1
Q92824	PCSK5	PCSK5 PC5 PC6	0.937535	Yes	membrane&secreted	NULL	extracellular region|extracellular space	GO:0005576|GO:0005615	--	--	--	PCSK5
Q96PZ7	CSMD1	CSMD1 KIAA1890 UNQ5952/PRO19863	0.937172	No	membrane	NULL	NULL	NULL	IPR000859;IPR000436	NULL	MUC7;NRG3	CSMD1
P08217	CELA2A	CELA2A ELA2A	0.937172	Yes	secreted	NULL	extracellular space|extracellular region	GO:0005615|GO:0005576	--	--	--	CELA2A
Q9P218	COL20A1	COL20A1 KIAA1510	0.937152	Yes	secreted	NULL	extracellular space|collagen-containing extracellular matrix|extracellular matrix|extracellular region	GO:0005615|GO:0062023|GO:0031012|GO:0005576	--	--	--	COL20A1
Q9GZT5	WNT10A	WNT10A	0.937152	Yes	membrane	NULL	extracellular region|extracellular space	GO:0005576|GO:0005615	--	--	--	WNT10A
Q7Z5Y6	BMP8A	BMP8A	0.937111	Yes	secreted	NULL	extracellular space	GO:0005615	--	--	--	BMP8A
P11047	LAMC1	LAMC1 LAMB2	0.93699	Yes	secreted	isExome	extracellular matrix disassembly|collagen-containing extracellular matrix|extracellular region|extracellular matrix structural constituent|extracellular space|extracellular exosome|extracellular matrix organization	GO:0022617|GO:0062023|GO:0005576|GO:0005201|GO:0005615|GO:0070062|GO:0030198	--	--	--	LAMC1
P08519	LPA	LPA	0.936869	Yes	secreted	isExome	extracellular region	GO:0005576	--	--	--	LPA
Q9NQ36	SCUBE2	SCUBE2 CEGP1	0.936768	Yes	secreted	NULL	extracellular space|extracellular region	GO:0005615|GO:0005576	--	--	--	SCUBE2
Q9UGT4	SUSD2	SUSD2	0.936586	No	membrane	isExome	extracellular exosome	GO:0070062	IPR001212;IPR000436;IPR001846	LGALS1	ISM2;ISM1;LGALS1	SUSD2
Q8WXS8	ADAMTS14	ADAMTS14	0.936364	Yes	secreted	NULL	extracellular region	GO:0005576	--	--	--	ADAMTS14
P60852	ZP1	ZP1	0.936202	Yes	membrane	NULL	collagen-containing extracellular matrix|extracellular region	GO:0062023|GO:0005576	--	--	--	ZP1
O75326	SEMA7A	SEMA7A CD108 SEMAL	0.935859	Yes	membrane	NULL	collagen-containing extracellular matrix|extracellular space	GO:0062023|GO:0005615	--	--	--	SEMA7A
Q16270	IGFBP7	IGFBP7 MAC25 PSF	0.935798	Yes	secreted	isExome	collagen-containing extracellular matrix|extracellular region|extracellular matrix structural constituent|extracellular space|extracellular exosome	GO:0062023|GO:0005576|GO:0005201|GO:0005615|GO:0070062	--	--	--	IGFBP7
Q96JK4	HHIPL1	HHIPL1 HHIP2 KIAA1822 UNQ9245/PRO34761	0.935798	No	secreted	NULL	extracellular region	GO:0005576	NULL	NULL	COL4A1;COL4A2;OTOL1;ADAMTS7	HHIPL1
Q8WUA8	TSKU	TSKU E2IG4 LRRC54 TSK UNQ850/PRO1788	0.935616	Yes	secreted	NULL	extracellular space	GO:0005615	--	--	--	TSKU
Q7Z5L7	PODN	PODN SLRR5A UNQ293/PRO332	0.935293	Yes	intracellular	isExome	extracellular space|collagen-containing extracellular matrix|extracellular matrix structural constituent conferring compression resistance	GO:0005615|GO:0062023|GO:0030021	--	--	--	PODN
O43854	EDIL3	EDIL3 DEL1	0.935172	Yes	secreted	isExome	extracellular vesicle|extracellular exosome|collagen-containing extracellular matrix|extracellular matrix structural constituent	GO:1903561|GO:0070062|GO:0062023|GO:0005201	--	--	--	EDIL3
P35237	SERPINB6	SERPINB6 PI6 PTI	0.935131	Yes	intracellular	isExome	collagen-containing extracellular matrix|extracellular region|extracellular space|extracellular exosome	GO:0062023|GO:0005576|GO:0005615|GO:0070062	--	--	--	SERPINB6
O60687	SRPX2	SRPX2 SRPUL	0.93499	Yes	secreted	isExome	extracellular space	GO:0005615	--	--	--	SRPX2
P80511	S100A12	S100A12	0.934626	Yes	intracellular	NULL	extracellular region	GO:0005576	--	--	--	S100A12
Q8TE58	ADAMTS15	ADAMTS15	0.934626	Yes	secreted	NULL	extracellular matrix binding|extracellular space|collagen-containing extracellular matrix	GO:0050840|GO:0005615|GO:0062023	--	--	--	ADAMTS15
Q9NR99	MXRA5	MXRA5	0.934606	Yes	secreted	isExome	extracellular exosome|collagen-containing extracellular matrix|extracellular matrix structural constituent	GO:0070062|GO:0062023|GO:0005201	--	--	--	MXRA5
P11226	MBL2	MBL2 COLEC1 MBL	0.934222	Yes	secreted	isExome	extracellular region|extracellular matrix|extracellular space	GO:0005576|GO:0031012|GO:0005615	--	--	--	MBL2
P48740	MASP1	MASP1 CRARF CRARF1 PRSS5	0.93398	Yes	secreted	isExome	extracellular region|extracellular space	GO:0005576|GO:0005615	--	--	--	MASP1
Q8WTR8	NTN5	NTN5	0.933758	Yes	secreted	NULL	extracellular region	GO:0005576	--	--	--	NTN5
P16581	SELE	SELE ELAM1	0.933636	No	membrane	NULL	extracellular space	GO:0005615	IPR001304;IPR000436	NULL	VWF;FN1;ADIPOQ;SPP1;ELN;COL18A1;TNF;VEGFA;IL6;IL10;IL1B;CXCL8;CCL2;IL4;IL1A;IFNG;IL17A;IL18;SERPINE1;PF4;MMP9;INS;CCL5;CXCL12;PLG;CXCL1;IL2;TNFSF15;CXCL10;ANGPT2;CSF3;EMCN;CX3CL1;F2;EGF;CSF2;SERPINC1;ANGPT1;FGF2;MMP2;CXCL2;PLAT;SERPING1;CXCL9;CCL21;LEP;CCL3;LPA;CCL19;TIMP1;MMP1;CCL4;IL5;IL13;LGALS7;CCL11;MMP3;CXCL11;ANXA5;LGALS3;ELANE;CCL20;MUC1;PGF;CCL17;CXCL5;HGF;CSF1;LGALS9;KNG1	SELE
P98164	LRP2	LRP2	0.933172	No	membrane&secreted	isExome	extracellular exosome	GO:0070062	IPR001881	NULL	AGRN;HSPG2;THBS1;LAMA5;LAMA3;SHH;WNT5A;EGF;GPC1;GPC3;GPC2;GPC4;SDC1;GPC6;SDC3;GPC5;SDC4;SDC2;IHH;INS;DHH;LEP;S100A10;AGT;LPA;SERPINE1;CST3;CTSB;PLAU;A2M;ANXA2;MMP2;FGF23	LRP2
P55107	GDF10	GDF10 BMP3B	0.933091	Yes	secreted	NULL	collagen-containing extracellular matrix|extracellular space	GO:0062023|GO:0005615	--	--	--	GDF10
Q6UXC1	MAMDC4	MAMDC4 AEGP UNQ3001/PRO9742	0.932808	No	membrane	NULL	NULL	NULL	NULL	NULL	VWF;ADAMTS13	MAMDC4
Q5SZK8	FREM2	FREM2	0.932505	Yes	membrane	isExome	extracellular exosome	GO:0070062	--	--	--	FREM2
O96014	WNT11	WNT11	0.932505	Yes	secreted	NULL	extracellular region|extracellular matrix|extracellular space	GO:0005576|GO:0031012|GO:0005615	--	--	--	WNT11
O76076	WISP2	WISP2 CCN5 CT58 CTGFL UNQ228/PRO261	0.932485	Yes	secreted	NULL	extracellular space|extracellular matrix	GO:0005615|GO:0031012	--	--	--	WISP2
P35247	SFTPD	SFTPD COLEC7 PSPD SFTP4	0.932141	Yes	secreted	NULL	extracellular region|extracellular space	GO:0005576|GO:0005615	--	--	--	SFTPD
Q99965	ADAM2	ADAM2 FTNB	0.931677	Yes	membrane	NULL	NULL	NULL	--	--	--	ADAM2
P00734	F2	F2	0.931394	Yes	secreted	isExome	collagen-containing extracellular matrix|extracellular region|extracellular exosome|extracellular space	GO:0062023|GO:0005576|GO:0070062|GO:0005615	--	--	--	F2
Q9NPR2	SEMA4B	SEMA4B KIAA1745 SEMAC UNQ749/PRO1480	0.931333	Yes	membrane&secreted	NULL	extracellular space	GO:0005615	--	--	--	SEMA4B
P02745	C1QA	C1QA	0.931273	Yes	secreted	isExome	collagen-containing extracellular matrix|extracellular region	GO:0062023|GO:0005576	--	--	--	C1QA
Q6UXF7	CLEC18B	CLEC18B MRLP1 UNQ306/PRO347	0.931273	Yes	secreted	NULL	extracellular space	GO:0005615	--	--	--	CLEC18B
P51610	HCFC1	HCFC1 HCF1 HFC1	0.930889	Yes	intracellular	isExome	NULL	NULL	--	--	--	HCFC1
O75636	FCN3	FCN3 FCNH HAKA1	0.930727	Yes	secreted	isExome	extracellular region	GO:0005576	--	--	--	FCN3
P50452	SERPINB8	SERPINB8 PI8	0.930707	Yes	intracellular	NULL	extracellular space|extracellular exosome|collagen-containing extracellular matrix	GO:0005615|GO:0070062|GO:0062023	--	--	--	SERPINB8
Q8IX30	SCUBE3	SCUBE3 CEGF3	0.930545	Yes	secreted	NULL	extracellular space|extracellular matrix disassembly	GO:0005615|GO:0022617	--	--	--	SCUBE3
P39060	COL18A1	COL18A1	0.930545	Yes	secreted	isExome	extracellular matrix structural constituent conferring tensile strength|collagen-containing extracellular matrix|extracellular region|extracellular matrix structural constituent|extracellular space|extracellular exosome|extracellular matrix organization|extracellular matrix	GO:0030020|GO:0062023|GO:0005576|GO:0005201|GO:0005615|GO:0070062|GO:0030198|GO:0031012	--	--	--	COL18A1
P09871	C1S	C1S	0.930242	No	secreted	isExome	extracellular space|extracellular region	GO:0005615|GO:0005576	IPR000859;IPR001881;IPR000436	NULL	AGRN;FN1;VTN;VWF;DCN;VWA2;SERPING1;C1QB;C1QA;C1QC;MBL2;FCN2;FCN3;SERPINF2;FCN1;SERPINC1;SCUBE1;COLEC11;A2M;KNG1;PGF;FGF2;EGF;SERPINA1;ADAMTS13	C1S
P02760	AMBP	AMBP HCP ITIL	0.93	Yes	secreted	isExome	collagen-containing extracellular matrix|extracellular region|extracellular exosome|extracellular space	GO:0062023|GO:0005576|GO:0070062|GO:0005615	--	--	--	AMBP
Q8IUL8	CILP2	CILP2	0.929697	Yes	secreted	NULL	extracellular exosome	GO:0070062	--	--	--	CILP2
Q6UXI7	VIT	VIT UNQ647/PRO1277	0.928606	Yes	secreted	NULL	extracellular space|extracellular matrix organization|extracellular matrix	GO:0005615|GO:0030198|GO:0031012	--	--	--	VIT
P41221	WNT5A	WNT5A	0.928222	Yes	secreted	isExome	collagen-containing extracellular matrix|extracellular region|extracellular exosome|extracellular space	GO:0062023|GO:0005576|GO:0070062|GO:0005615	--	--	--	WNT5A
P45452	MMP13	MMP13	0.927758	Yes	secreted	NULL	extracellular matrix disassembly|extracellular region|extracellular space|extracellular matrix organization|extracellular matrix	GO:0022617|GO:0005576|GO:0005615|GO:0030198|GO:0031012	--	--	--	MMP13
O00339	MATN2	MATN2 UNQ193/PRO219	0.927596	Yes	secreted	isExome	collagen-containing extracellular matrix|extracellular matrix structural constituent|extracellular space|extracellular matrix	GO:0062023|GO:0005201|GO:0005615|GO:0031012	--	--	--	MATN2
Q86U17	SERPINA11	SERPINA11	0.927333	Yes	secreted	NULL	extracellular space	GO:0005615	--	--	--	SERPINA11
Q93097	WNT2B	WNT2B WNT13	0.927152	Yes	membrane	NULL	extracellular region|extracellular space	GO:0005576|GO:0005615	--	--	--	WNT2B
Q6UWL2	SUSD1	SUSD1 UNQ2438/PRO4999	0.926808	No	membrane&secreted	isExome	NULL	NULL	IPR001881;IPR000436	NULL	MEGF8	SUSD1
P13497	BMP1	BMP1 PCOLC	0.926808	Yes	secreted	NULL	extracellular matrix disassembly|extracellular region|extracellular space	GO:0022617|GO:0005576|GO:0005615	--	--	--	BMP1
P51884	LUM	LUM LDC SLRR2D	0.926788	Yes	secreted	isExome	collagen-containing extracellular matrix|extracellular region|extracellular matrix structural constituent|extracellular space|extracellular exosome|extracellular matrix organization|extracellular matrix structural constituent conferring compression resistance|extracellular matrix	GO:0062023|GO:0005576|GO:0005201|GO:0005615|GO:0070062|GO:0030198|GO:0030021|GO:0031012	--	--	--	LUM
P53634	CTSC	CTSC CPPI	0.926727	Yes	secreted	isExome	collagen-containing extracellular matrix|extracellular region|extracellular exosome|extracellular space	GO:0062023|GO:0005576|GO:0070062|GO:0005615	--	--	--	CTSC
P55083	MFAP4	MFAP4	0.926182	Yes	secreted	isExome	collagen-containing extracellular matrix|extracellular region|extracellular matrix structural constituent	GO:0062023|GO:0005576|GO:0005201	--	--	--	MFAP4
Q5VYJ5	MALRD1	MALRD1 C10orf112 DIET1	0.92602	No	membrane	NULL	NULL	NULL	NULL	NULL	FGF19;INS;CSPG5	MALRD1
P07477	PRSS1	PRSS1 TRP1 TRY1 TRYP1	0.92602	Yes	secreted	NULL	extracellular space|extracellular matrix disassembly|collagen-containing extracellular matrix|extracellular region	GO:0005615|GO:0022617|GO:0062023|GO:0005576	--	--	--	PRSS1
Q14520	HABP2	HABP2 HGFAL PHBP	0.925879	Yes	secreted	NULL	extracellular space|extracellular region	GO:0005615|GO:0005576	--	--	--	HABP2
P02747	C1QC	C1QC C1QG	0.925758	Yes	secreted	isExome	collagen-containing extracellular matrix|extracellular region|extracellular space	GO:0062023|GO:0005576|GO:0005615	--	--	--	C1QC
Q6ZMM2	ADAMTSL5	ADAMTSL5 THSD6	0.925293	Yes	secreted	NULL	extracellular matrix|extracellular region	GO:0031012|GO:0005576	--	--	--	ADAMTSL5
Q9Y5R2	MMP24	MMP24 MT5MMP	0.925192	Yes	membrane	isExome	extracellular space|extracellular exosome|extracellular matrix organization|extracellular matrix	GO:0005615|GO:0070062|GO:0030198|GO:0031012	--	--	--	MMP24
A6NMZ7	COL6A6	COL6A6	0.925131	Yes	secreted	NULL	extracellular matrix structural constituent conferring tensile strength|collagen-containing extracellular matrix|extracellular matrix|extracellular region	GO:0030020|GO:0062023|GO:0031012|GO:0005576	--	--	--	COL6A6
Q92832	NELL1	NELL1 NRP1	0.92503	Yes	secreted	NULL	extracellular region	GO:0005576	--	--	--	NELL1
P05121	SERPINE1	SERPINE1 PAI1 PLANH1	0.924586	Yes	secreted	isExome	collagen-containing extracellular matrix|extracellular region|extracellular exosome|extracellular space|extracellular matrix organization	GO:0062023|GO:0005576|GO:0070062|GO:0005615|GO:0030198	--	--	--	SERPINE1
O95450	ADAMTS2	ADAMTS2 PCINP PCPNI	0.924303	Yes	secreted	isExome	collagen-containing extracellular matrix|extracellular region	GO:0062023|GO:0005576	--	--	--	ADAMTS2
P02746	C1QB	C1QB	0.924182	Yes	secreted	isExome	collagen-containing extracellular matrix|extracellular region	GO:0062023|GO:0005576	--	--	--	C1QB
Q9NZP8	C1RL	C1RL C1RL1 C1RLP CLSPA	0.924162	No	secreted	isExome	extracellular space|extracellular exosome	GO:0005615|GO:0070062	IPR000859	NULL	HPX;SERPING1;LOXL4;BMP1;SERPINB2	C1RL
P05154	SERPINA5	SERPINA5 PCI PLANH3 PROCI	0.924101	Yes	secreted	isExome	collagen-containing extracellular matrix|extracellular region|extracellular exosome|extracellular space	GO:0062023|GO:0005576|GO:0070062|GO:0005615	--	--	--	SERPINA5
Q9BXR6	CFHR5	CFHR5 CFHL5 FHR5	0.924081	No	secreted	NULL	extracellular region	GO:0005576	IPR000436	NULL	COL4A4;COL4A3;COL4A5;F9;MBL2;SERPINA11;MASP2;ADAMTS13;F13B;SFTPC	CFHR5
Q08188	TGM3	TGM3	0.923677	Yes	intracellular	isExome	extracellular exosome	GO:0070062	--	--	--	TGM3
Q86Z23	C1QL4	C1QL4 CTRP11	0.922949	Yes	secreted	NULL	extracellular space	GO:0005615	--	--	--	C1QL4
P07585	DCN	DCN SLRR1B	0.922808	Yes	secreted	isExome	collagen-containing extracellular matrix|extracellular region|extracellular matrix structural constituent conferring compression resistance|extracellular matrix binding|extracellular space|extracellular matrix organization	GO:0062023|GO:0005576|GO:0030021|GO:0050840|GO:0005615|GO:0030198	--	--	--	DCN
Q13214	SEMA3B	SEMA3B SEMA5 SEMAA	0.922646	Yes	secreted	NULL	extracellular space	GO:0005615	--	--	--	SEMA3B
A8TX70	COL6A5	COL6A5 COL29A1 VWA4	0.922485	Yes	secreted	NULL	extracellular matrix structural constituent conferring tensile strength|collagen-containing extracellular matrix|extracellular region	GO:0030020|GO:0062023|GO:0005576	--	--	--	COL6A5
Q9UKP4	ADAMTS7	ADAMTS7	0.922465	Yes	secreted	NULL	extracellular region	GO:0005576	--	--	--	ADAMTS7
P23297	S100A1	S100A1 S100A	0.922222	Yes	intracellular	NULL	extracellular region	GO:0005576	--	--	--	S100A1
Q8NFY4	SEMA6D	SEMA6D KIAA1479	0.922121	Yes	membrane&secreted	NULL	extracellular space	GO:0005615	--	--	--	SEMA6D
Q92496	CFHR4	CFHR4 CFHL4 FHR4	0.922121	No	secreted	NULL	extracellular region	GO:0005576	IPR000436	NULL	MBL2;F13B	CFHR4
P01011	SERPINA3	SERPINA3 AACT GIG24 GIG25	0.921879	Yes	secreted	isExome	collagen-containing extracellular matrix|extracellular region|extracellular space|extracellular exosome	GO:0062023|GO:0005576|GO:0005615|GO:0070062	--	--	--	SERPINA3
P00740	F9	F9	0.921838	Yes	secreted	isExome	extracellular region|extracellular space|extracellular exosome	GO:0005576|GO:0005615|GO:0070062	--	--	--	F9
Q7Z408	CSMD2	CSMD2 KIAA1884	0.921758	No	membrane	isExome	NULL	NULL	IPR000859;IPR000436	NULL	HMCN1;CTSB	CSMD2
Q6UY14	ADAMTSL4	ADAMTSL4 TSRC1 PP1396 UNQ2803/PRO34012	0.921677	Yes	secreted	NULL	collagen-containing extracellular matrix|extracellular matrix organization	GO:0062023|GO:0030198	--	--	--	ADAMTSL4
Q96RW7	HMCN1	HMCN1 FIBL6	0.921636	Yes	secreted	isExome	collagen-containing extracellular matrix|extracellular matrix structural constituent|extracellular exosome	GO:0062023|GO:0005201|GO:0070062	--	--	--	HMCN1
O15204	ADAMDEC1	ADAMDEC1	0.921273	Yes	secreted	NULL	extracellular region	GO:0005576	--	--	--	ADAMDEC1
Q9H1J7	WNT5B	WNT5B	0.921192	Yes	secreted	isExome	collagen-containing extracellular matrix|extracellular region|extracellular space|extracellular exosome	GO:0062023|GO:0005576|GO:0005615|GO:0070062	--	--	--	WNT5B
Q9BWP8	COLEC11	COLEC11 UNQ596/PRO1182	0.920727	Yes	secreted	NULL	extracellular region|extracellular space	GO:0005576|GO:0005615	--	--	--	COLEC11
Q96S86	HAPLN3	HAPLN3 EXLD1 UNQ238/PRO271	0.920444	Yes	membrane&secreted	isExome	extracellular space|extracellular matrix	GO:0005615|GO:0031012	--	--	--	HAPLN3
Q9Y6F9	WNT6	WNT6	0.920384	Yes	secreted	NULL	extracellular region|extracellular space|extracellular exosome|extracellular matrix	GO:0005576|GO:0005615|GO:0070062|GO:0031012	--	--	--	WNT6
Q9UNI1	CELA1	CELA1 ELA1	0.920384	Yes	intracellular	NULL	extracellular space	GO:0005615	--	--	--	CELA1
O43506	ADAM20	ADAM20	0.920162	Yes	membrane	NULL	NULL	NULL	--	--	--	ADAM20
Q9C0C4	SEMA4C	SEMA4C KIAA1739 SEMAI UNQ5855/PRO34487	0.919919	Yes	membrane&secreted	isExome	extracellular space	GO:0005615	--	--	--	SEMA4C
P35858	IGFALS	IGFALS ALS	0.919434	Yes	membrane&secreted	isExome	extracellular space|extracellular exosome|extracellular matrix|extracellular region	GO:0005615|GO:0070062|GO:0031012|GO:0005576	--	--	--	IGFALS
O14904	WNT9A	WNT9A WNT14	0.919374	Yes	secreted	NULL	extracellular region|extracellular space	GO:0005576|GO:0005615	--	--	--	WNT9A
Q8WWU7	ITLN2	ITLN2 UNQ2789/PRO7179	0.919212	Yes	secreted	NULL	extracellular region	GO:0005576	--	--	--	ITLN2
O95389	WISP3	WISP3 CCN6 UNQ462/PRO790/PRO956	0.919051	Yes	secreted	NULL	extracellular space|extracellular matrix	GO:0005615|GO:0031012	--	--	--	WISP3
Q02817	MUC2	MUC2 SMUC	0.916828	Yes	NULL	NULL	NULL	NULL	--	--	--	MUC2
P02750	LRG1	LRG1 LRG	0.916364	Yes	secreted	isExome	extracellular region|extracellular space|extracellular exosome	GO:0005576|GO:0005615|GO:0070062	--	--	--	LRG1
P25815	S100P	S100P S100E	0.915899	Yes	intracellular	isExome	extracellular region|extracellular exosome	GO:0005576|GO:0070062	--	--	--	S100P
P36955	SERPINF1	SERPINF1 PEDF PIG35	0.915859	Yes	secreted	isExome	collagen-containing extracellular matrix|extracellular region|extracellular exosome|extracellular space	GO:0062023|GO:0005576|GO:0070062|GO:0005615	--	--	--	SERPINF1
Q8N2E2	VWDE	VWDE	0.915859	Yes	secreted	NULL	extracellular region	GO:0005576	--	--	--	VWDE
Q9UPZ6	THSD7A	THSD7A KIAA0960	0.915475	No	membrane	isExome	extracellular region	GO:0005576	IPR000884	NULL	THSD4;SPON1;THBS2;THBS1;SPON2;SBSPON;ADAMTS13;SEMA5B;SEMA5A;ADAMTS9;ADAMTS15;ADAMTS18;ADAMTS4;ADAMTS3;ADAMTS1;ADAMTSL5;ADAMTS19;ADAMTS20;ADAMTS8;ADAMTS2;ADAMTS10;ADAMTS17;ADAMTS5;ADAMTSL3;ADAMTS12;ADAMTS14;ADAMTS16;ADAMTS6;ADAMTSL1;ADAMTSL4;ADAMTSL2;ADAMTS7;FREM3;C17orf58	THSD7A
Q86VB7	CD163	CD163 M130	0.915434	No	membrane	isExome	extracellular region	GO:0005576	NULL	NULL	FGL2;VWF;KAL1;IL10;C1QB;C1QA;IL6;CSF1;F13A1;CCL18;C1QC;S100A9;CD209;TNF;CCL2;PF4;IL4;TNFSF12;IL13;CXCL10;ADAM17;CSF2;CXCL8;MMP9;CCL22;HPX;IL1B;CCL5;VEGFA;CCL17;CXCL9;CLEC10A;IL1A;CCL3;CLEC7A;IL17A;CCL4;IFNG;CLEC17A;CXCL12;IL18;IL1RN;IL34;INS;EDA;IL2;CLEC4A;CCL8;LGALS3;CXCL11;PLAT	CD163
P12644	BMP4	BMP4 BMP2B DVR4	0.915172	Yes	secreted	isExome	extracellular region|extracellular space	GO:0005576|GO:0005615	--	--	--	BMP4
O14786	NRP1	NRP1 NRP VEGF165R	0.914646	No	membrane&secreted	isExome	extracellular space	GO:0005615	IPR000859	PLXNA2;VEGFA;VEGFA;VEGFA;VEGFA;VEGFA;VEGFA;VEGFA;VEGFA	FN1;NTN1;HSPG2;LAMA1;SLIT3;SLIT2;SEMA3A;VEGFA;PLXNA2;SEMA3C;PLXNA1;SEMA3E;SEMA3F;SEMA3B;PLXND1;PLXNA4;PLXNA3;SEMA3D;SEMA3G;PLXNB1;PGF;SEMA4A;VEGFB;SEMA6A;SEMA6D;SEMA5B;SEMA5A;SEMA6B;SEMA4B;SEMA4G;SEMA6C;SEMA7A;SEMA4C;SEMA4D;SEMA4F;VEGFC;FGF2;PLXNB3;CLEC4C;PLXNC1;PLXNB2;IL10;HGF;EGF;PDGFB;FIGF;CSF1;PTN;FGF1;ANGPT1;ANGPT2;TNF;GDNF;IL2;IL6;CD209;FGF7;IL4	NRP1
P26447	S100A4	S100A4 CAPL MTS1	0.914505	Yes	intracellular	isExome	extracellular region|extracellular space|extracellular exosome	GO:0005576|GO:0005615|GO:0070062	--	--	--	S100A4
Q6UVK1	CSPG4	CSPG4 MCSP	0.914222	Yes	membrane	isExome	collagen-containing extracellular matrix|extracellular region|extracellular exosome	GO:0062023|GO:0005576|GO:0070062	--	--	--	CSPG4
O00755	WNT7A	WNT7A	0.913697	Yes	intracellular	NULL	extracellular region|extracellular exosome|extracellular matrix|extracellular space	GO:0005576|GO:0070062|GO:0031012|GO:0005615	--	--	--	WNT7A
P07093	SERPINE2	SERPINE2 PI7 PN1	0.913636	Yes	secreted	isExome	extracellular vesicle|collagen-containing extracellular matrix|extracellular region|extracellular space	GO:1903561|GO:0062023|GO:0005576|GO:0005615	--	--	--	SERPINE2
Q5IJ48	CRB2	CRB2	0.913495	No	membrane&secreted	isExome	extracellular exosome	GO:0070062	IPR001881;IPR001791	NULL	ADAM10;WNT1	CRB2
Q96A84	EMID1	EMID1 EMU1	0.913273	Yes	secreted	NULL	extracellular matrix	GO:0031012	--	--	--	EMID1
P10619	CTSA	CTSA PPGB	0.913232	Yes	secreted	isExome	extracellular region|extracellular exosome	GO:0005576|GO:0070062	--	--	--	CTSA
Q8NDA2	HMCN2	HMCN2	0.913152	Yes	secreted	NULL	extracellular space|collagen-containing extracellular matrix|extracellular matrix|extracellular matrix structural constituent	GO:0005615|GO:0062023|GO:0031012|GO:0005201	--	--	--	HMCN2
P16144	ITGB4	ITGB4	0.913051	No	membrane	isExome	extracellular exosome|extracellular matrix organization	GO:0070062|GO:0030198	IPR003961	CX3CL1	COL17A1;LAMB3;LAMA3;LAMC2;LAMA4;LAMA5;LAMB1;LAMA1;LAMC1;LAMA2;LAMB2;COL4A5;LAMB4;COL6A1;COL4A4;COL4A3;COL6A3;THBS1;COL4A2;VWF;COL1A2;COL1A1;COL4A1;VTN;COL6A2;COL4A6;THBS2;THBS3;COL2A1;SPP1;LAMC3;COL9A3;IBSP;TNN;TNXB;COL9A1;COL6A6;CHAD;RELN;TNR;TNC;THBS4;COL6A5;COL9A2;COMP;EMILIN1;COL7A1;EGF;SDC1;MUC5AC;SHH;ANXA7	ITGB4
P56706	WNT7B	WNT7B	0.912869	Yes	secreted	NULL	extracellular region|extracellular exosome|extracellular space	GO:0005576|GO:0070062|GO:0005615	--	--	--	WNT7B
Q9BZ11	ADAM33	ADAM33 C20orf153 UNQ873/PRO1891	0.912182	Yes	membrane&secreted	NULL	NULL	NULL	--	--	--	ADAM33
Q15113	PCOLCE	PCOLCE PCPE1	0.911919	Yes	secreted	isExome	collagen-containing extracellular matrix|extracellular region|extracellular matrix structural constituent|extracellular space|extracellular exosome	GO:0062023|GO:0005576|GO:0005201|GO:0005615|GO:0070062	--	--	--	PCOLCE
Q5VV63	ATRNL1	ATRNL1 KIAA0534	0.911535	No	membrane	NULL	NULL	NULL	IPR001304;IPR000859;IPR002049	NULL	CLEC3B	ATRNL1
Q6UXH8	CCBE1	CCBE1 KIAA1983 UNQ1921/PRO4395	0.911515	Yes	secreted	NULL	extracellular space|extracellular matrix	GO:0005615|GO:0031012	--	--	--	CCBE1
O15335	CHAD	CHAD SLRR4A	0.911091	Yes	secreted	NULL	extracellular space|extracellular matrix	GO:0005615|GO:0031012	--	--	--	CHAD
P04003	C4BPA	C4BPA C4BP	0.911071	No	secreted	isExome	extracellular region|extracellular space	GO:0005576|GO:0005615	IPR000436	NULL	ZP1;FGL1;FGG;FGB;VTN;FN1;SERPING1;S100A10;TCHH;PROL1;C1QA;CST4;C1QB;SERPINC1;S100A6	C4BPA
O95196	CSPG5	CSPG5 CALEB NGC	0.91101	Yes	membrane	isExome	extracellular region	GO:0005576	--	--	--	CSPG5
P04271	S100B	S100B	0.910949	Yes	intracellular	NULL	extracellular region|extracellular space	GO:0005576|GO:0005615	--	--	--	S100B
P51511	MMP15	MMP15	0.910404	Yes	membrane	isExome	extracellular matrix disassembly|extracellular space|extracellular matrix organization|extracellular matrix	GO:0022617|GO:0005615|GO:0030198|GO:0031012	--	--	--	MMP15
Q6UXD5	SEZ6L2	SEZ6L2 PSK UNQ1903/PRO4349	0.910384	No	membrane&secreted	NULL	NULL	NULL	IPR000859;IPR000436	NULL	FRAS1;PLXDC2	SEZ6L2
Q9NTN9	SEMA4G	SEMA4G KIAA1619	0.910222	Yes	membrane&secreted	NULL	extracellular space	GO:0005615	--	--	--	SEMA4G
Q04756	HGFAC	HGFAC	0.910202	Yes	secreted	isExome	extracellular space|extracellular region	GO:0005615|GO:0005576	--	--	--	HGFAC
Q92626	PXDN	PXDN KIAA0230 MG50 PRG2 VPO VPO1	0.91	Yes	secreted	isExome	collagen-containing extracellular matrix|extracellular region|extracellular matrix structural constituent|extracellular space|extracellular exosome|extracellular matrix organization	GO:0062023|GO:0005576|GO:0005201|GO:0005615|GO:0070062|GO:0030198	--	--	--	PXDN
Q99102	MUC4	MUC4	0.909939	Yes	membrane	isExome	extracellular space|extracellular exosome|extracellular matrix constituent, lubricant activity|extracellular matrix	GO:0005615|GO:0070062|GO:0030197|GO:0031012	--	--	--	MUC4
Q99645	EPYC	EPYC DSPG3 PGLB SLRR3B	0.909939	Yes	secreted	NULL	extracellular region	GO:0005576	--	--	--	EPYC
P98155	VLDLR	VLDLR	0.909919	No	membrane&secreted	NULL	NULL	NULL	IPR001881	NULL	RELN;SPON1;SERPINE1;PLAU;INHBE;LPA;IL6;A2M	VLDLR
Q9Y2H6	FNDC3A	FNDC3A FNDC3 HUGO KIAA0970	0.909717	No	membrane	NULL	NULL	NULL	IPR003961	NULL	HMCN2;HPSE2;P4HA3	FNDC3A
Q9H2X0	CHRD	CHRD UNQ217/PRO243	0.909576	Yes	secreted	NULL	extracellular space	GO:0005615	--	--	--	CHRD
P08185	SERPINA6	SERPINA6 CBG	0.909495	Yes	secreted	NULL	extracellular space|extracellular exosome	GO:0005615|GO:0070062	--	--	--	SERPINA6
Q86UW8	HAPLN4	HAPLN4 BRAL2 KIAA1926	0.90901	Yes	secreted	NULL	extracellular matrix	GO:0031012	--	--	--	HAPLN4
O00602	FCN1	FCN1 FCNM	0.90899	Yes	membrane&secreted	isExome	collagen-containing extracellular matrix|extracellular region	GO:0062023|GO:0005576	--	--	--	FCN1
Q9NPY3	CD93	CD93 C1QR1 MXRA4	0.908808	No	membrane	NULL	NULL	NULL	IPR001304;IPR001881	NULL	MMRN2;VWF;COL4A1;CLEC12A;CLEC5A;CLEC4D;PLAU;MMP25;ADAM8;SERPINB6;CLEC4C;ADAM10;C1QA;FCN3;MBL2;SDC1;CLEC3B;FCN2;C1QTNF2;TNFSF13B;COLEC10;F13A1;C1QB;C1QC;FCN1;MASP1;SFTPA2;SFTPA1	CD93
Q2VPA4	CR1L	CR1L	0.908242	No	secreted	NULL	extracellular region	GO:0005576	IPR000436	NULL	NULL	CR1L
Q53EP0	FNDC3B	FNDC3B FAD104 NS5ABP37 UNQ2421/PRO4979/PRO34274	0.907495	No	membrane	NULL	NULL	NULL	IPR003961	NULL	COL5A1;COL4A3	FNDC3B
P50454	SERPINH1	SERPINH1 CBP1 CBP2 HSP47 SERPINH2 PIG14	0.907475	Yes	secreted	isExome	collagen-containing extracellular matrix|extracellular space	GO:0062023|GO:0005615	--	--	--	SERPINH1
O43548	TGM5	TGM5 TGMX	0.907394	Yes	intracellular	NULL	NULL	NULL	--	--	--	TGM5
P04004	VTN	VTN	0.907333	Yes	secreted	isExome	collagen-containing extracellular matrix|extracellular region|extracellular exosome|extracellular matrix structural constituent|extracellular matrix binding|extracellular space|extracellular matrix organization	GO:0062023|GO:0005576|GO:0070062|GO:0005201|GO:0050840|GO:0005615|GO:0030198	--	--	--	VTN
P09382	LGALS1	LGALS1	0.907111	Yes	intracellular	isExome	collagen-containing extracellular matrix|extracellular region|extracellular exosome|extracellular space	GO:0062023|GO:0005576|GO:0070062|GO:0005615	--	--	--	LGALS1
P06681	C2	C2	0.90703	No	secreted	NULL	extracellular region|extracellular space|extracellular exosome	GO:0005576|GO:0005615|GO:0070062	IPR000436;IPR002035	NULL	HMCN1;FBLN5;TNN;TNXB;MBL2;FCN2;MASP1;C1QC;FCN3;C1QB;FCN1;C1QA;COLEC11;COLEC10;MASP2;HTRA1;SERPING1;CST3;SERPINB12	C2
P49221	TGM4	TGM4	0.906747	Yes	intracellular	isExome	extracellular exosome|collagen-containing extracellular matrix	GO:0070062|GO:0062023	--	--	--	TGM4
O60938	KERA	KERA SLRR2B	0.906606	Yes	secreted	NULL	extracellular matrix|extracellular region	GO:0031012|GO:0005576	--	--	--	KERA
Q96GW7	BCAN	BCAN BEHAB CSPG7 UNQ2525/PRO6018	0.906505	Yes	secreted	NULL	extracellular region|extracellular matrix organization|extracellular matrix	GO:0005576|GO:0030198|GO:0031012	--	--	--	BCAN
Q9Y4D7	PLXND1	PLXND1 KIAA0620	0.906404	Yes	membrane	isExome	NULL	NULL	--	--	--	PLXND1
P10915	HAPLN1	HAPLN1 CRTL1	0.90602	Yes	secreted	isExome	collagen-containing extracellular matrix|extracellular matrix organization|extracellular matrix structural constituent conferring compression resistance|extracellular matrix|extracellular region	GO:0062023|GO:0030198|GO:0030021|GO:0031012|GO:0005576	--	--	--	HAPLN1
Q9UHI8	ADAMTS1	ADAMTS1 KIAA1346 METH1	0.90596	Yes	membrane&secreted	isExome	collagen-containing extracellular matrix	GO:0062023	--	--	--	ADAMTS1
P19876	CXCL3	CXCL3 GRO3 GROG SCYB3	0.905859	Yes	secreted	NULL	extracellular space|extracellular region	GO:0005615|GO:0005576	--	--	--	CXCL3
P00742	F10	F10	0.905778	Yes	secreted	isExome	extracellular region|extracellular space	GO:0005576|GO:0005615	--	--	--	F10
P09093	CELA3A	CELA3A ELA3 ELA3A	0.905515	Yes	secreted	NULL	extracellular space	GO:0005615	--	--	--	CELA3A
O60911	CTSV	CTSV CATL2 CTSL2 CTSU UNQ268/PRO305	0.905131	Yes	secreted	isExome	extracellular region|extracellular matrix disassembly|extracellular space	GO:0005576|GO:0022617|GO:0005615	--	--	--	CTSV
Q13219	PAPPA	PAPPA	0.904828	Yes	secreted	isExome	extracellular space|extracellular region	GO:0005615|GO:0005576	--	--	--	PAPPA
Q9GZU5	NYX	NYX CLRP	0.904727	Yes	secreted	NULL	extracellular space|extracellular matrix	GO:0005615|GO:0031012	--	--	--	NYX
Q9Y561	LRP12	LRP12 ST7	0.904586	No	membrane	NULL	NULL	NULL	IPR000859	NULL	AGRN;HSPG2;SDC3;SDC1;GPC2;GPC5;SDC4;GPC1;GPC3;SDC2;GPC4;GPC6	LRP12
Q8WWZ8	OIT3	OIT3 LZP UNQ826/PRO1753	0.904424	Yes	secreted	isExome	NULL	NULL	--	--	--	OIT3
P00750	PLAT	PLAT	0.904384	Yes	secreted	isExome	extracellular region|extracellular space|extracellular exosome	GO:0005576|GO:0005615|GO:0070062	--	--	--	PLAT
Q13591	SEMA5A	SEMA5A SEMAF	0.904141	Yes	membrane&secreted	isExome	extracellular exosome	GO:0070062	--	--	--	SEMA5A
P07911	UMOD	UMOD	0.90404	No	membrane&secreted	isExome	extracellular exosome	GO:0070062	IPR001881;IPR001507	NULL	SPP1;MUC1;AMBP;CST3;SERPINA1;KNG1;CST6	UMOD
Q9UJW2	TINAG	TINAG	0.904	Yes	intracellular	NULL	extracellular space	GO:0005615	--	--	--	TINAG
Q13751	LAMB3	LAMB3 LAMNB1	0.903818	Yes	secreted	isExome	extracellular matrix organization|extracellular region	GO:0030198|GO:0005576	--	--	--	LAMB3
P48595	SERPINB10	SERPINB10 PI10	0.903657	Yes	intracellular	NULL	extracellular space	GO:0005615	--	--	--	SERPINB10
O00214	LGALS8	LGALS8	0.903475	Yes	intracellular	isExome	extracellular space	GO:0005615	--	--	--	LGALS8
P30740	SERPINB1	SERPINB1 ELANH2 MNEI PI2	0.903293	Yes	intracellular	isExome	extracellular space|extracellular exosome|collagen-containing extracellular matrix|extracellular region	GO:0005615|GO:0070062|GO:0062023|GO:0005576	--	--	--	SERPINB1
Q9UKJ8	ADAM21	ADAM21	0.903273	Yes	membrane	NULL	NULL	NULL	--	--	--	ADAM21
Q5H8C1	FREM1	FREM1 C9orf143 C9orf145 C9orf154	0.903131	Yes	secreted	NULL	NULL	NULL	--	--	--	FREM1
Q9UMD9	COL17A1	COL17A1 BP180 BPAG2	0.902545	Yes	membrane	NULL	extracellular matrix structural constituent conferring tensile strength|collagen-containing extracellular matrix|extracellular region|extracellular matrix structural constituent|extracellular space|extracellular matrix organization|extracellular matrix	GO:0030020|GO:0062023|GO:0005576|GO:0005201|GO:0005615|GO:0030198|GO:0031012	--	--	--	COL17A1
O14594	NCAN	NCAN CSPG3 NEUR	0.902525	Yes	secreted	NULL	extracellular region|extracellular matrix organization|extracellular matrix	GO:0005576|GO:0030198|GO:0031012	--	--	--	NCAN
O95965	ITGBL1	ITGBL1 OSCP TIED	0.902263	No	secreted	NULL	extracellular region	GO:0005576	NULL	NULL	LAMA3;COL12A1;MXRA5;LAMC2;COL5A2;COL21A1;COL6A3;EGF	ITGBL1
P08246	ELANE	ELANE ELA2	0.902121	Yes	secreted	isExome	collagen-containing extracellular matrix|extracellular region|extracellular exosome|extracellular matrix disassembly|extracellular space	GO:0062023|GO:0005576|GO:0070062|GO:0022617|GO:0005615	--	--	--	ELANE
P00747	PLG	PLG	0.90202	Yes	secreted	isExome	collagen-containing extracellular matrix|extracellular region|extracellular exosome|extracellular matrix disassembly|extracellular space	GO:0062023|GO:0005576|GO:0070062|GO:0022617|GO:0005615	--	--	--	PLG
Q9BXN1	ASPN	ASPN PLAP1 SLRR1C UNQ215/PRO241	0.901677	Yes	secreted	isExome	collagen-containing extracellular matrix|extracellular matrix structural constituent conferring compression resistance|extracellular matrix	GO:0062023|GO:0030021|GO:0031012	--	--	--	ASPN
P16112	ACAN	ACAN AGC1 CSPG1 MSK16	0.901515	Yes	secreted	NULL	collagen-containing extracellular matrix|extracellular region|extracellular matrix structural constituent conferring compression resistance|extracellular matrix|extracellular matrix structural constituent|extracellular matrix organization|perisynaptic extracellular matrix	GO:0062023|GO:0005576|GO:0030021|GO:0031012|GO:0005201|GO:0030198|GO:0098966	--	--	--	ACAN
P01023	A2M	A2M CPAMD5 FWP007	0.901394	Yes	secreted	isExome	collagen-containing extracellular matrix|extracellular region|extracellular exosome|extracellular matrix disassembly	GO:0062023|GO:0005576|GO:0070062|GO:0022617	--	--	--	A2M
Q6YHK3	CD109	CD109 CPAMD7	0.901273	Yes	membrane	isExome	extracellular region|extracellular space	GO:0005576|GO:0005615	--	--	--	CD109
P02776	PF4	PF4 CXCL4 SCYB4	0.901071	Yes	secreted	NULL	collagen-containing extracellular matrix|extracellular region|extracellular space	GO:0062023|GO:0005576|GO:0005615	--	--	--	PF4
Q86YZ3	HRNR	HRNR S100A18	0.900889	Yes	intracellular	isExome	collagen-containing extracellular matrix|extracellular region|extracellular exosome	GO:0062023|GO:0005576|GO:0070062	--	--	--	HRNR
Q7Z3S9	NOTCH2NL	NOTCH2NL N2N	0.900101	No	intracellular	NULL	NULL	NULL	IPR001881	NULL	ADAM10	NOTCH2NL
O75078	ADAM11	ADAM11 MDC	0.89998	Yes	membrane	NULL	collagen-containing extracellular matrix	GO:0062023	--	--	--	ADAM11
Q4G0T1			0.899333	No	NULL	NULL	NULL	NULL	--	--	--
Q9UKQ2	ADAM28	ADAM28 ADAM23 MDCL	0.899051	Yes	membrane&secreted	NULL	extracellular region	GO:0005576	--	--	--	ADAM28
O95970	LGI1	LGI1 EPT UNQ775/PRO1569	0.89899	Yes	secreted	NULL	extracellular region|extracellular space	GO:0005576|GO:0005615	--	--	--	LGI1
P36952	SERPINB5	SERPINB5 PI5	0.89897	Yes	intracellular	isExome	extracellular space|extracellular matrix organization	GO:0005615|GO:0030198	--	--	--	SERPINB5
P21754	ZP3	ZP3 ZP3A ZP3B ZPC	0.898828	Yes	membrane	isExome	collagen-containing extracellular matrix|extracellular region|extracellular matrix structural constituent|extracellular space	GO:0062023|GO:0005576|GO:0005201|GO:0005615	--	--	--	ZP3
Q685J3	MUC17	MUC17 MUC3	0.898626	Yes	membrane	isExome	collagen-containing extracellular matrix|extracellular matrix constituent, lubricant activity	GO:0062023|GO:0030197	--	--	--	MUC17
P58166	INHBE	INHBE	0.898404	Yes	secreted	NULL	extracellular space	GO:0005615	--	--	--	INHBE
Q96P63	SERPINB12	SERPINB12	0.898364	Yes	intracellular	isExome	extracellular space	GO:0005615	--	--	--	SERPINB12
P78509	RELN	RELN	0.898242	Yes	secreted	isExome	extracellular region|extracellular matrix|extracellular space	GO:0005576|GO:0031012|GO:0005615	--	--	--	RELN
Q9UKR3	KLK13	KLK13 KLKL4	0.898222	No	secreted	NULL	extracellular space|extracellular region	GO:0005615|GO:0005576	NULL	NULL	IGFBP3;IGFALS;SPON1;IGF2;IGF1;KNG1;SERPINE2;EGF;A2M;SERPINB6;AGT;NTF4;SERPINF2;FLG;NGF	KLK13
Q6WRI0	IGSF10	IGSF10 CMF608	0.898101	Yes	secreted	NULL	extracellular region	GO:0005576	--	--	--	IGSF10
Q9Y251	HPSE	HPSE HEP HPA HPA1 HPR1 HPSE1 HSE1	0.897414	Yes	secreted	isExome	extracellular region|extracellular matrix	GO:0005576|GO:0031012	--	--	--	HPSE
Q06828	FMOD	FMOD FM SLRR2E	0.897091	Yes	secreted	isExome	extracellular space|collagen-containing extracellular matrix|extracellular matrix structural constituent conferring compression resistance|extracellular matrix|extracellular region	GO:0005615|GO:0062023|GO:0030021|GO:0031012|GO:0005576	--	--	--	FMOD
P56470	LGALS4	LGALS4	0.896727	Yes	intracellular	isExome	extracellular space	GO:0005615	--	--	--	LGALS4
P01034	CST3	CST3	0.896727	Yes	secreted	isExome	extracellular region|extracellular exosome|negative regulation of extracellular matrix disassembly|extracellular space	GO:0005576|GO:0070062|GO:0010716|GO:0005615	--	--	--	CST3
Q7Z4F1	LRP10	LRP10 MSTP087 SP220 UNQ389/PRO724	0.896606	No	membrane	isExome	NULL	NULL	IPR000859	NULL	HSPG2;AGRN;SDC4;SDC2;SDC1;SDC3;GPC1;GPC2;GPC4;GPC6;GPC3;GPC5;WNT16;WNT8B	LRP10
O75339	CILP	CILP UNQ602/PRO1188	0.89598	Yes	secreted	NULL	extracellular space|extracellular exosome|collagen-containing extracellular matrix|extracellular matrix structural constituent	GO:0005615|GO:0070062|GO:0062023|GO:0005201	--	--	--	CILP
Q9UBG0	MRC2	MRC2 CLEC13E ENDO180 KIAA0709 UPARAP	0.895374	No	membrane	isExome	NULL	NULL	IPR001304;IPR000562	NULL	COL6A2;COL5A1;MMP14;PLAU;PLG;MMP2;LGALS3	MRC2
P07204	THBD	THBD THRM	0.895313	No	membrane	NULL	extracellular space	GO:0005615	IPR001304;IPR001881	F2;F2;F2;F2	VWF;FGL2;FN1;F2;F10;SERPINC1;PLG;PF4;SERPINE1;PLAT;TNF;CLEC4C;CLEC9A;F7;SERPINA5;ADAMTS13;IL6;IL4;SERPIND1;ADAM22;CXCL8;PLAU;VEGFA;SERPINE2;CD209;F9;SERPINF2;IL10;ELANE;PPBP;CCL2;HABP2;IL1B;LPA;CSF2;FLT3LG;CLEC4A;SDC1;ANGPT2;SERPINB2;MMP9;KNG1;HRG	THBD
Q9UBM4	OPTC	OPTC OPT	0.895273	Yes	secreted	NULL	extracellular matrix|extracellular region|extracellular matrix structural constituent	GO:0031012|GO:0005576|GO:0005201	--	--	--	OPTC
Q2I0M5	RSPO4	RSPO4 C20orf182	0.895192	Yes	secreted	NULL	extracellular space|extracellular region	GO:0005615|GO:0005576	--	--	--	RSPO4
O75077	ADAM23	ADAM23 MDC3	0.895051	Yes	membrane	NULL	extracellular region	GO:0005576	--	--	--	ADAM23
P10720	PF4V1	PF4V1 CXCL4V1 SCYB4V1	0.894949	Yes	secreted	NULL	extracellular space	GO:0005615	--	--	--	PF4V1
P01137	TGFB1	TGFB1 TGFB	0.894586	Yes	secreted	isExome	extracellular space|positive regulation of extracellular matrix assembly|extracellular matrix|collagen-containing extracellular matrix|extracellular matrix assembly|extracellular region|negative regulation of extracellular matrix disassembly	GO:0005615|GO:1901203|GO:0031012|GO:0062023|GO:0085029|GO:0005576|GO:0010716	--	--	--	TGFB1
Q9C0I4	THSD7B	THSD7B KIAA1679	0.894586	No	membrane	NULL	NULL	NULL	IPR000884	NULL	SPON1;THBS2;SPON2;THBS1;SBSPON;THSD4;COL25A1;ADAMTS13;SEMA5A;SEMA5B;ADAMTS18;ADAMTS15;ADAMTS12;ADAMTS3;ADAMTS20;ADAMTS8;ADAMTSL1;ADAMTS5;ADAMTS9;ADAMTS19;ADAMTS17;ADAMTS10;ADAMTSL3;ADAMTSL2;ADAMTSL4;ADAMTS4;ADAMTS16;ADAMTS7;ADAMTS1;ADAMTSL5;ADAMTS2;ADAMTS14;ADAMTS6	THSD7B
P01009	SERPINA1	SERPINA1 AAT PI PRO0684 PRO2209	0.894545	Yes	secreted	isExome	collagen-containing extracellular matrix|extracellular region|extracellular exosome|extracellular space	GO:0062023|GO:0005576|GO:0070062|GO:0005615	--	--	--	SERPINA1
P51888	PRELP	PRELP SLRR2A	0.894465	Yes	secreted	isExome	extracellular vesicle|collagen-containing extracellular matrix|extracellular region|extracellular matrix structural constituent|extracellular exosome|extracellular matrix structural constituent conferring compression resistance|extracellular matrix	GO:1903561|GO:0062023|GO:0005576|GO:0005201|GO:0070062|GO:0030021|GO:0031012	--	--	--	PRELP
P08603	CFH	CFH HF HF1 HF2	0.894	No	secreted	isExome	extracellular space|extracellular exosome|extracellular region	GO:0005615|GO:0070062|GO:0005576	IPR000436	NULL	VTN;COL8A1;VWF;HMCN1;THBS1;FBLN5;EFEMP1;FN1;C1QB;ADAMTS13;HTRA1;SERPING1;C1QC;IL6;C1QA;VEGFA;TIMP3;MBL2;PLG;A2M;IFNG;MASP1;SERPINF1;MASP2;CXCL8;F2;CCL2	CFH
Q9UBR2	CTSZ	CTSZ	0.893899	Yes	secreted	isExome	collagen-containing extracellular matrix|extracellular region|extracellular exosome|extracellular space	GO:0062023|GO:0005576|GO:0070062|GO:0005615	--	--	--	CTSZ
Q08830	FGL1	FGL1 HFREP1	0.893697	Yes	secreted	NULL	NULL	NULL	--	--	--	FGL1
P04196	HRG	HRG	0.893576	Yes	secreted	isExome	collagen-containing extracellular matrix|extracellular region|extracellular exosome	GO:0062023|GO:0005576|GO:0070062	--	--	--	HRG
P06702	S100A9	S100A9 CAGB CFAG MRP14	0.893556	Yes	intracellular	isExome	collagen-containing extracellular matrix|extracellular region|extracellular exosome|extracellular space	GO:0062023|GO:0005576|GO:0070062|GO:0005615	--	--	--	S100A9
Q9NTU7	CBLN4	CBLN4 CBLNL1 UNQ718/PRO1382	0.892889	Yes	secreted	NULL	extracellular space	GO:0005615	--	--	--	CBLN4
P00736	C1R	C1R	0.892404	No	secreted	isExome	extracellular region|extracellular space|extracellular exosome	GO:0005576|GO:0005615|GO:0070062	IPR000859;IPR001881;IPR000436	NULL	DCN;COL8A1;VTN;LUM;VWF;SERPING1;C1QB;C1QA;C1QC;MBL2;FCN2;FCN3;FCN1;COLEC11;MEP1A;SCUBE1;EGF;A2M;KNG1;ADAMTS13;SERPINC1	C1R
P55103	INHBC	INHBC	0.892	Yes	secreted	NULL	extracellular space|extracellular region	GO:0005615|GO:0005576	--	--	--	INHBC
Q9H2U9	ADAM7	ADAM7 GP83	0.891798	Yes	membrane&secreted	NULL	NULL	NULL	--	--	--	ADAM7
P20742	PZP	PZP CPAMD6	0.891455	Yes	secreted	isExome	extracellular exosome|collagen-containing extracellular matrix|extracellular region	GO:0070062|GO:0062023|GO:0005576	--	--	--	PZP
P50453	SERPINB9	SERPINB9 PI9	0.891273	Yes	intracellular	isExome	collagen-containing extracellular matrix|extracellular space|extracellular exosome	GO:0062023|GO:0005615|GO:0070062	--	--	--	SERPINB9
Q8IU80	TMPRSS6	TMPRSS6 UNQ354/PRO618	0.891152	No	membrane	NULL	extracellular matrix disassembly|extracellular space|extracellular matrix organization	GO:0022617|GO:0005615|GO:0030198	IPR000859;IPR000082	NULL	DCN;LAMB3;LAMC1;LAMC2;LAMB1;LAMA3;LAMA5;FGA;FGG;LTBP2;FN1;FGB;LTBP1;LAMA1;BMP6;EPO;SERPINC1;ANGPTL3;SERPINA10;F7;F9;ITIH2;MBL2;HGFAC;IL6;F13B;HRG;ITIH3;HABP2;F12;GDF15;A2M	TMPRSS6
P22792	CPN2	CPN2 ACBP	0.891091	Yes	secreted	isExome	extracellular space|extracellular exosome|extracellular matrix|extracellular region	GO:0005615|GO:0070062|GO:0031012|GO:0005576	--	--	--	CPN2
Q8WTU2	SSC4D	SSC4D SRCRB4D	0.890808	No	secreted	NULL	extracellular region	GO:0005576	NULL	NULL	TMPRSS15;BMP5	SSC4D
P20023	CR2	CR2 C3DR	0.890485	No	membrane	isExome	extracellular exosome	GO:0070062	IPR000436	NULL	IFNA21;IFNA17;IFNA2;TNFSF13B;SDC1;CXCL13;IL10;IL4;IL2;TNF;IFNA1;IL6;IL7;ANXA5;IL17A;CCL21;CCL19	CR2
Q14114	LRP8	LRP8 APOER2	0.890263	No	membrane	NULL	extracellular region	GO:0005576	IPR001881	NULL	RELN;AGRN;HSPG2;SPON1;SDC3;GPC4;GPC6;GPC1;GPC3;SDC1;GPC5;SDC2;GPC2;SDC4;INHBE;ANGPTL3;WNT6;A2M;WNT4;WNT1	LRP8
P09341	CXCL1	CXCL1 GRO GRO1 GROA MGSA SCYB1	0.890081	Yes	secreted	NULL	extracellular region|extracellular space	GO:0005576|GO:0005615	--	--	--	CXCL1
P09668	CTSH	CTSH CPSB	0.89004	Yes	secreted	isExome	extracellular region|extracellular exosome|extracellular space	GO:0005576|GO:0070062|GO:0005615	--	--	--	CTSH
P05162	LGALS2	LGALS2	0.889899	Yes	intracellular	NULL	NULL	NULL	--	--	--	LGALS2
P17927	CR1	CR1 C3BR	0.889737	No	membrane	isExome	extracellular exosome	GO:0070062	IPR000436	NULL	C1QA;PZP;CXCL8;MBL2;TNF;CXCL13;FCN2;SERPING1;MASP1;FCN3;ANXA9;MASP2;SDC1;FCN1;FREM1;IL10	CR1
Q9Y2Y8	PRG3	PRG3 MBPH UNQ486/PRO1002	0.889717	Yes	secreted	NULL	collagen-containing extracellular matrix|extracellular region|extracellular matrix structural constituent conferring compression resistance	GO:0062023|GO:0005576|GO:0030021	--	--	--	PRG3
P83110	HTRA3	HTRA3 PRSP	0.889717	Yes	secreted	isExome	extracellular region	GO:0005576	--	--	--	HTRA3
P29279	CTGF	CTGF CCN2 HCS24 IGFBP8	0.889576	Yes	secreted	NULL	collagen-containing extracellular matrix|extracellular matrix constituent secretion|extracellular region|extracellular matrix|extracellular space	GO:0062023|GO:0070278|GO:0005576|GO:0031012|GO:0005615	--	--	--	CTGF
O75074	LRP3	LRP3	0.889333	No	membrane	NULL	NULL	NULL	IPR000859	NULL	VWA5B2;HSPG2;CRLF1;CTSD	LRP3
Q8IUX8	EGFL6	EGFL6 MAEG PP648 UNQ281/PRO320	0.889253	Yes	secreted	NULL	extracellular space|extracellular matrix organization	GO:0005615|GO:0030198	--	--	--	EGFL6
P01019	AGT	AGT SERPINA8	0.889212	Yes	secreted	isExome	positive regulation of extracellular matrix constituent secretion|extracellular region|extracellular exosome|extracellular space|regulation of extracellular matrix assembly	GO:0003331|GO:0005576|GO:0070062|GO:0005615|GO:1901201	--	--	--	AGT
P98073	TMPRSS15	TMPRSS15 ENTK PRSS7	0.88899	Yes	intracellular	NULL	NULL	NULL	--	--	--	TMPRSS15
O15393	TMPRSS2	TMPRSS2 PRSS10	0.88897	No	membrane	isExome	extracellular exosome	GO:0070062	NULL	NULL	CTSB;CTSL;PCSK5	TMPRSS2
O95754	SEMA4F	SEMA4F SEMAM SEMAW	0.888848	Yes	membrane&secreted	NULL	extracellular space	GO:0005615	--	--	--	SEMA4F
O15031	PLXNB2	PLXNB2 KIAA0315	0.888646	Yes	membrane&secreted	isExome	extracellular exosome	GO:0070062	--	--	--	PLXNB2
Q92743	HTRA1	HTRA1 HTRA PRSS11	0.888586	Yes	secreted	isExome	extracellular matrix disassembly|collagen-containing extracellular matrix|extracellular region|extracellular space|extracellular exosome	GO:0022617|GO:0062023|GO:0005576|GO:0005615|GO:0070062	--	--	--	HTRA1
Q99983	OMD	OMD SLRR2C UNQ190/PRO216	0.888566	Yes	secreted	NULL	extracellular exosome|collagen-containing extracellular matrix|extracellular region	GO:0070062|GO:0062023|GO:0005576	--	--	--	OMD
Q9HDB5	NRXN3	NRXN3 KIAA0743	0.88798	No	membrane	NULL	NULL	NULL	IPR001791	NULL	CBLN1;CBLN4;CBLN2;BDNF;CBLN3	NRXN3
Q9NYQ7	CELSR3	CELSR3 CDHF11 EGFL1 FMI1 KIAA0812 MEGF2	0.887717	No	membrane	NULL	NULL	NULL	IPR001881;IPR002049;IPR001791	NULL	SEMA6C;SEMA6B;SEMA6A;WNT11;WNT5A;WNT5B;SEMA6D;EGF	CELSR3
Q9UK23	NAGPA	NAGPA	0.887556	No	membrane	NULL	NULL	NULL	NULL	NULL	LAMA5	NAGPA
O00182	LGALS9	LGALS9	0.887455	Yes	intracellular	NULL	extracellular space	GO:0005615	--	--	--	LGALS9
Q5GFL6	VWA2	VWA2 AMACO	0.887111	Yes	secreted	isExome	extracellular space|extracellular exosome|extracellular matrix	GO:0005615|GO:0070062|GO:0031012	--	--	--	VWA2
Q8TE59	ADAMTS19	ADAMTS19	0.886889	Yes	secreted	NULL	extracellular region	GO:0005576	--	--	--	ADAMTS19
P31949	S100A11	S100A11 MLN70 S100C	0.886162	Yes	intracellular	isExome	extracellular region|extracellular space|extracellular exosome	GO:0005576|GO:0005615|GO:0070062	--	--	--	S100A11
O95460	MATN4	MATN4	0.88604	Yes	secreted	NULL	extracellular space|extracellular matrix organization|extracellular matrix|extracellular region	GO:0005615|GO:0030198|GO:0031012|GO:0005576	--	--	--	MATN4
Q8TC27	ADAM32	ADAM32 UNQ5982/PRO21340	0.88596	Yes	membrane&secreted	NULL	NULL	NULL	--	--	--	ADAM32
O60259	KLK8	KLK8 NRPN PRSS19 TADG14 UNQ283/PRO322	0.885798	No	secreted	isExome	extracellular region|extracellular space	GO:0005576|GO:0005615	NULL	NULL	SERPINA5;SERPINB6;KNG1;EGF;SLPI;NTF4;NGF	KLK8
Q7Z410	TMPRSS9	TMPRSS9	0.885616	No	membrane	NULL	NULL	NULL	NULL	NULL	NULL	TMPRSS9
Q6N022	TENM4	TENM4 KIAA1302 ODZ4 TNM4	0.885091	No	membrane	isExome	NULL	NULL	NULL	NULL	NCAN;MFAP2;EGF;ITIH3	TENM4
A1KZ92	PXDNL	PXDNL VPO2	0.884727	Yes	secreted	NULL	extracellular space	GO:0005615	--	--	--	PXDNL
Q99895	CTRC	CTRC CLCR	0.884121	No	secreted	NULL	extracellular region	GO:0005576	NULL	NULL	PRSS1;CELA3B;CELA3A;HTRA1;CELA2A;CELA2B;PRSS3;CST3;INS	CTRC
P43235	CTSK	CTSK CTSO CTSO2	0.88396	Yes	membrane&secreted	NULL	extracellular matrix disassembly|extracellular region|extracellular space	GO:0022617|GO:0005576|GO:0005615	--	--	--	CTSK
O75596	CLEC3A	CLEC3A CLECSF1 UNQ700/PRO1345	0.883899	Yes	secreted	NULL	extracellular space	GO:0005615	--	--	--	CLEC3A
P47929	LGALS7	LGALS7 PIG1; LGALS7B	0.883576	Yes	intracellular	isExome	extracellular space|extracellular exosome	GO:0005615|GO:0070062	--	--	--	LGALS7
P00751	CFB	CFB BF BFD	0.88301	No	secreted	isExome	extracellular space|extracellular exosome|extracellular region	GO:0005615|GO:0070062|GO:0005576	IPR000436;IPR002035	LAMC3	FGG;FGA;FN1;COL17A1;FGB;VTN;COL8A1;TNXB;LRG1;HMCN1;SERPING1;SERPINA1;TNF;C1QC;HTRA1;ADAMTS13;C1QB;C1QA;A2M;TIMP3;MBL2;SERPINC1;IL6;HPX;SERPIND1;PDGFB;SERPINF2;SERPINA6;CCL2;CCL20;F13B	CFB
Q9Y3Q7	ADAM18	ADAM18 TMDC3 UNQ858/PRO1867	0.881859	Yes	membrane&secreted	NULL	NULL	NULL	--	--	--	ADAM18
Q9HCB6	SPON1	SPON1 KIAA0762 VSGP	0.881697	Yes	secreted	isExome	collagen-containing extracellular matrix|extracellular matrix structural constituent|extracellular space|extracellular matrix	GO:0062023|GO:0005201|GO:0005615|GO:0031012	--	--	--	SPON1
Q9UKF2	ADAM30	ADAM30 UNQ2509/PRO5997	0.881434	Yes	membrane	isExome	NULL	NULL	--	--	--	ADAM30
P19827	ITIH1	ITIH1 IGHEP1	0.880848	Yes	secreted	isExome	extracellular exosome|collagen-containing extracellular matrix|extracellular region	GO:0070062|GO:0062023|GO:0005576	--	--	--	ITIH1
O43927	CXCL13	CXCL13 BCA1 BLC SCYB13	0.880828	Yes	secreted	NULL	extracellular region|extracellular space	GO:0005576|GO:0005615	--	--	--	CXCL13
Q9UKZ4	TENM1	TENM1 ODZ1 TNM1	0.880788	No	membrane	NULL	extracellular region	GO:0005576	NULL	NULL	C1QL3;EGF	TENM1
O60494	CUBN	CUBN IFCR	0.880141	No	secreted	isExome	extracellular exosome	GO:0070062	IPR000859;IPR001881	NULL	LGALS3;LPA;ADAMTS13;CTSZ;ADAMTS2	CUBN
Q9HCU0	CD248	CD248 CD164L1 TEM1	0.879535	No	membrane	isExome	extracellular matrix protein binding|extracellular matrix binding|extracellular exosome|extracellular matrix	GO:1990430|GO:0050840|GO:0070062|GO:0031012	IPR001304;IPR001881	NULL	COL1A1;COL1A2;COL3A1;COL6A2;FBLN2;BGN;EMILIN1;COL5A1;COL4A1;FN1;PLXDC1;SERPINB5;SERPINB8;SERPINB6	CD248
Q9H306	MMP27	MMP27 UNQ2503/PRO5992	0.879293	Yes	secreted	NULL	extracellular space|extracellular matrix organization|extracellular matrix	GO:0005615|GO:0030198|GO:0031012	--	--	--	MMP27
P35030	PRSS3	PRSS3 PRSS4 TRY3 TRY4	0.879232	Yes	secreted	isExome	extracellular region|extracellular space	GO:0005576|GO:0005615	--	--	--	PRSS3
Q9H4F8	SMOC1	SMOC1	0.878909	Yes	secreted	NULL	extracellular matrix binding	GO:0050840	--	--	--	SMOC1
P28799	GRN	GRN	0.878505	No	secreted	isExome	extracellular region|extracellular exosome	GO:0005576|GO:0070062	NULL	FBN1;HSPG2;HSPG2;HSPG2;HSPG2;ECM1;TGM2	HSPG2;POSTN;ELANE;CTSA;CTSG;CTSC;SERPINB3;ANXA2;S100A7;HRNR;SLPI;CTSD;ADAMTS7;VEGFA;IL10;CTSF;SERPINA12;WNT2;IL6;MMP12;LEP;CTSZ;CTSO;TNF;WNT1;CTSB;CST3;ADAMTS12;INS;SERPINA1	GRN
Q08431	MFGE8	MFGE8	0.878162	Yes	secreted	isExome	extracellular vesicle|collagen-containing extracellular matrix|extracellular region|extracellular matrix structural constituent|extracellular space|extracellular exosome	GO:1903561|GO:0062023|GO:0005576|GO:0005201|GO:0005615|GO:0070062	--	--	--	MFGE8
Q9ULZ9	MMP17	MMP17 MT4MMP	0.87804	Yes	secreted	NULL	extracellular space|extracellular matrix organization|extracellular matrix	GO:0005615|GO:0030198|GO:0031012	--	--	--	MMP17
P34820	BMP8B	BMP8B BMP8	0.877798	Yes	secreted	NULL	extracellular space	GO:0005615	--	--	--	BMP8B
Q7RTZ1	OVCH2	OVCH2 OVTN	0.877374	No	secreted	NULL	extracellular region	GO:0005576	IPR000859	NULL	CTSE;SERPINB11	OVCH2
P24592	IGFBP6	IGFBP6 IBP6	0.877192	Yes	secreted	isExome	extracellular region|extracellular space	GO:0005576|GO:0005615	--	--	--	IGFBP6
P16109	SELP	SELP GMRP GRMP	0.87699	No	membrane	isExome	extracellular space	GO:0005615	IPR001304;IPR000436	VCAN;COL18A1	VWF;FN1;VCAN;FGL2;VTN;ADIPOQ;THBS1;ELN;F2;PF4;TNF;IL4;IL1B;PPBP;IL6;CCL2;THPO;CXCL8;PLG;SERPINE1;IL17A;SERPINC1;CCL5;VEGFA;IFNG;IL10;IL3;ANXA5;CXCL12;MMP9;ADAMTS13;PLAT;CXCL1;INS;CLEC1B;IL2;EGF;ANGPT2;SERPING1;F7;ANGPT1;ELANE;CCL21;PRL;CSF2;MMP2;CXCL10;CTSG;CX3CL1;CCL19;CXCL2;CCL3;IL18;FGF2;F10;CSF3;LGALS9;IL13;CCL25;KNG1;LGALS3;CXCL9;TIMP1;IL5;CCL11;CD209;CCL4;F13A1;LPA;CXCL5	SELP
P25774	CTSS	CTSS	0.876889	Yes	secreted	NULL	collagen-containing extracellular matrix|extracellular region|extracellular matrix disassembly|extracellular space	GO:0062023|GO:0005576|GO:0022617|GO:0005615	--	--	--	CTSS
P98088	MUC5AC	MUC5AC MUC5	0.876808	Yes	secreted	isExome	extracellular space|extracellular exosome|extracellular matrix structural constituent	GO:0005615|GO:0070062|GO:0005201	--	--	--	MUC5AC
O43866	CD5L	CD5L API6 UNQ203/PRO229	0.876667	No	secreted	isExome	extracellular space|extracellular region	GO:0005615|GO:0005576	NULL	NULL	HRG;IL17A;CPN2	CD5L
Q9NT68	TENM2	TENM2 KIAA1127 ODZ2 TNM2	0.876101	No	membrane	NULL	NULL	NULL	IPR001881	NULL	NTNG1;ACAN	TENM2
Q13332	PTPRS	PTPRS	0.875758	No	membrane&secreted	isExome	extracellular exosome	GO:0070062	IPR003961	PTN	AGRN;FN1;NCAN;NTF3;GPC6;MEP1B;GPC1;BDNF;GPC2;GPC4;PTN;IFNB1	PTPRS
Q12913	PTPRJ	PTPRJ DEP1	0.875697	No	membrane&secreted	isExome	extracellular exosome	GO:0070062	IPR003961	SFRP4	THBS1;FN1;VEGFA;CLEC12A;HGF;CLEC4D;ADAM10;PDGFB;PLAU;ADAM8;CLEC5A;MMP25;PAPPA;LGALS9	PTPRJ
Q9H3R2	MUC13	MUC13 DRCC1 RECC UNQ6194/PRO20221	0.875515	Yes	membrane&secreted	isExome	extracellular space	GO:0005615	--	--	--	MUC13
Q3ZCW2	LGALSL	LGALSL GRP HSPC159	0.875293	Yes	intracellular	isExome	NULL	NULL	--	--	--	LGALSL
Q7RTY7	OVCH1	OVCH1	0.87501	No	secreted	NULL	extracellular region	GO:0005576	IPR000859	NULL	COL20A1	OVCH1
Q6NUI6	CHADL	CHADL SLRR4B	0.874485	Yes	secreted	NULL	extracellular space|collagen-containing extracellular matrix|extracellular matrix structural constituent conferring compression resistance|extracellular matrix	GO:0005615|GO:0062023|GO:0030021|GO:0031012	--	--	--	CHADL
P09525	ANXA4	ANXA4 ANX4	0.874343	Yes	intracellular	isExome	collagen-containing extracellular matrix|extracellular exosome	GO:0062023|GO:0070062	--	--	--	ANXA4
Q15828	CST6	CST6	0.874263	Yes	secreted	NULL	extracellular exosome	GO:0070062	--	--	--	CST6
P07339	CTSD	CTSD CPSD	0.874162	Yes	secreted	isExome	collagen-containing extracellular matrix|extracellular region|extracellular space|extracellular exosome	GO:0062023|GO:0005576|GO:0005615|GO:0070062	--	--	--	CTSD
Q9BXJ5	C1QTNF2	C1QTNF2 CTRP2 UNQ6349/PRO21054	0.87404	Yes	secreted	NULL	extracellular space	GO:0005615	--	--	--	C1QTNF2
Q9P273	TENM3	TENM3 KIAA1455 ODZ3 TNM3	0.873919	No	membrane	isExome	NULL	NULL	NULL	NULL	NYX;COL24A1;C1QL3	TENM3
O95631	NTN1	NTN1 NTN1L	0.873818	Yes	secreted	NULL	extracellular region	GO:0005576	--	--	--	NTN1
Q15582	TGFBI	TGFBI BIGH3	0.873778	Yes	secreted	isExome	collagen-containing extracellular matrix|extracellular region|extracellular matrix structural constituent|extracellular matrix binding|extracellular space|extracellular exosome|extracellular matrix organization|extracellular matrix	GO:0062023|GO:0005576|GO:0005201|GO:0050840|GO:0005615|GO:0070062|GO:0030198|GO:0031012	--	--	--	TGFBI
Q9GZV7	HAPLN2	HAPLN2 BRAL1	0.873596	Yes	secreted	NULL	extracellular matrix assembly|extracellular matrix	GO:0085029|GO:0031012	--	--	--	HAPLN2
P20073	ANXA7	ANXA7 ANX7 SNX OK/SW-cl.95	0.873293	Yes	intracellular	isExome	extracellular exosome	GO:0070062	--	--	--	ANXA7
Q8WWQ2	HPSE2	HPSE2 HPA2	0.872707	Yes	secreted	NULL	extracellular matrix organization|extracellular matrix	GO:0030198|GO:0031012	--	--	--	HPSE2
P23435	CBLN1	CBLN1	0.872586	Yes	secreted	NULL	NULL	NULL	--	--	--	CBLN1
P09237	MMP7	MMP7 MPSL1 PUMP1	0.872465	Yes	secreted	isExome	extracellular matrix disassembly|extracellular region|extracellular space|extracellular exosome|extracellular matrix organization|extracellular matrix	GO:0022617|GO:0005576|GO:0005615|GO:0070062|GO:0030198|GO:0031012	--	--	--	MMP7
O00744	WNT10B	WNT10B WNT12	0.872242	Yes	secreted	isExome	extracellular region|extracellular space	GO:0005576|GO:0005615	--	--	--	WNT10B
P48594	SERPINB4	SERPINB4 PI11 SCCA2	0.872121	Yes	intracellular	isExome	extracellular space	GO:0005615	--	--	--	SERPINB4
Q96I82	KAZALD1	KAZALD1 FKSG28 FKSG40 UNQ2945/PRO21184	0.872	Yes	secreted	NULL	extracellular matrix organization	GO:0030198	--	--	--	KAZALD1
P02749	APOH	APOH B2G1	0.871919	No	secreted	isExome	collagen-containing extracellular matrix|extracellular region|extracellular exosome|extracellular space	GO:0062023|GO:0005576|GO:0070062|GO:0005615	IPR000436	PLG;PLG;PF4;PF4;PF4;PF4;PF4;PF4;LPA;LPA;LPA;LPA;CLEC4G	FGG;ECM1;FGL1;FGB;FGA;IGFBP1;VTN;VWF;F2;ITIH3;AMBP;ITIH4;SERPINC1;SERPINA4;LPA;CLEC3B;TIMP3;CTSW;ITIH2;SERPIND1;PLG;ANXA2;SERPINA7;HRG;SERPINF2;SERPINA1;HPX;F10;A2M;KNG1;F12;PF4;ANXA5;F7;SERPINA11;MBL2;AGT;SERPINA6;SERPING1	APOH
P08311	CTSG	CTSG	0.870929	Yes	secreted	isExome	collagen-containing extracellular matrix|extracellular region|extracellular exosome|extracellular matrix disassembly|extracellular space	GO:0062023|GO:0005576|GO:0070062|GO:0022617|GO:0005615	--	--	--	CTSG
P21941	MATN1	MATN1 CMP CRTM	0.870869	Yes	secreted	NULL	extracellular space|collagen-containing extracellular matrix|extracellular matrix organization|extracellular matrix|extracellular region|extracellular matrix structural constituent	GO:0005615|GO:0062023|GO:0030198|GO:0031012|GO:0005576|GO:0005201	--	--	--	MATN1
Q5D862	FLG2	FLG2 IFPS	0.870444	Yes	intracellular	isExome	extracellular region	GO:0005576	--	--	--	FLG2
P05452	CLEC3B	CLEC3B TNA	0.870303	Yes	secreted	isExome	collagen-containing extracellular matrix|extracellular region|extracellular space|extracellular exosome	GO:0062023|GO:0005576|GO:0005615|GO:0070062	--	--	--	CLEC3B
Q6UXH1	CRELD2	CRELD2 UNQ185/PRO211	0.870141	Yes	secreted	NULL	extracellular space	GO:0005615	--	--	--	CRELD2
Q8N135	LGI4	LGI4 LGIL3 UNQ6515/PRO21485	0.87002	Yes	secreted	NULL	extracellular space|extracellular region	GO:0005615|GO:0005576	--	--	--	LGI4
Q9UKF5	ADAM29	ADAM29	0.869354	Yes	membrane&secreted	NULL	NULL	NULL	--	--	--	ADAM29
P22891	PROZ	PROZ	0.86897	No	secreted	isExome	extracellular space|extracellular exosome	GO:0005615|GO:0070062	IPR001881;IPR000294	NULL	FGG;FGA;FGB;SERPINA10;SERPINC1;F13B;F12;F9;HABP2;ITIH3;HRG;ANGPTL3;HGFAC;MBL2;F2;CTSG;ELANE;SERPINF2;F13A1;SERPIND1;SERPINA7;F7;SERPINA5	PROZ
Q6PCB0	VWA1	VWA1	0.868545	Yes	secreted	isExome	collagen-containing extracellular matrix|extracellular matrix structural constituent|extracellular space|extracellular exosome|extracellular matrix organization|extracellular matrix	GO:0062023|GO:0005201|GO:0005615|GO:0070062|GO:0030198|GO:0031012	--	--	--	VWA1
P50995	ANXA11	ANXA11 ANX11	0.868404	Yes	intracellular	isExome	collagen-containing extracellular matrix|extracellular exosome	GO:0062023|GO:0070062	--	--	--	ANXA11
Q9HD43	PTPRH	PTPRH SAP1	0.868202	No	membrane	NULL	NULL	NULL	IPR003961	NULL	FN1	PTPRH
Q8IVN8	SBSPON	SBSPON C8orf84 RPESP	0.868141	Yes	secreted	NULL	collagen-containing extracellular matrix|extracellular matrix structural constituent	GO:0062023|GO:0005201	--	--	--	SBSPON
P08174	CD55	CD55 CR DAF	0.868	No	membrane&secreted	isExome	extracellular region|extracellular exosome	GO:0005576|GO:0070062	IPR000436	NULL	VTN;INS;TNF;EGF;IL10;SERPING1;IL4;MBL2;MASP1;MASP2;LGALS7;MUC1;IL6;CXCL8;FCN2;LMAN1;VEGFA;S100A10	CD55
Q8N119	MMP21	MMP21	0.867596	Yes	secreted	NULL	extracellular matrix organization|extracellular matrix	GO:0030198|GO:0031012	--	--	--	MMP21
P07858	CTSB	CTSB CPSB	0.867192	Yes	secreted	isExome	collagen-containing extracellular matrix|extracellular region|extracellular exosome|extracellular space	GO:0062023|GO:0005576|GO:0070062|GO:0005615	--	--	--	CTSB
P05109	S100A8	S100A8 CAGA CFAG MRP8	0.867172	Yes	intracellular	isExome	collagen-containing extracellular matrix|extracellular region|extracellular exosome|extracellular space	GO:0062023|GO:0005576|GO:0070062|GO:0005615	--	--	--	S100A8
O75610	LEFTY1	LEFTY1 LEFTB LEFTYB UNQ278/PRO317	0.867111	Yes	secreted	NULL	extracellular space	GO:0005615	--	--	--	LEFTY1
Q96GP6	SCARF2	SCARF2 SREC2 SREPCR	0.866646	No	membrane	NULL	NULL	NULL	IPR002049	NULL	FBN2;VWC2;TGM3	SCARF2
P00488	F13A1	F13A1 F13A	0.866626	Yes	intracellular	isExome	collagen-containing extracellular matrix|extracellular region	GO:0062023|GO:0005576	--	--	--	F13A1
Q9H2E6	SEMA6A	SEMA6A KIAA1368 SEMAQ	0.866404	Yes	membrane&secreted	NULL	extracellular space	GO:0005615	--	--	--	SEMA6A
P21980	TGM2	TGM2	0.865818	Yes	intracellular	isExome	collagen-containing extracellular matrix|extracellular exosome	GO:0062023|GO:0070062	--	--	--	TGM2
Q6ZMI3	GLDN	GLDN COLM UNQ9339/PRO34011	0.865414	Yes	intracellular	NULL	extracellular space	GO:0005615	--	--	--	GLDN
P07711	CTSL	CTSL CTSL1	0.865374	Yes	secreted	isExome	extracellular region|extracellular exosome|extracellular matrix disassembly|extracellular space	GO:0005576|GO:0070062|GO:0022617|GO:0005615	--	--	--	CTSL
P13727	PRG2	PRG2 MBP	0.865333	Yes	secreted	NULL	extracellular exosome|collagen-containing extracellular matrix|extracellular matrix structural constituent conferring compression resistance|extracellular region	GO:0070062|GO:0062023|GO:0030021|GO:0005576	--	--	--	PRG2
P60903	S100A10	S100A10 ANX2LG CAL1L CLP11	0.865051	Yes	membrane	isExome	collagen-containing extracellular matrix|extracellular region|extracellular exosome	GO:0062023|GO:0005576|GO:0070062	--	--	--	S100A10
Q7RTY8	TMPRSS7	TMPRSS7	0.86501	No	membrane	NULL	NULL	NULL	IPR000859;IPR000082	NULL	NULL	TMPRSS7
P29122	PCSK6	PCSK6 PACE4	0.86404	Yes	intracellular	isExome	collagen-containing extracellular matrix|extracellular region|extracellular space	GO:0062023|GO:0005576|GO:0005615	--	--	--	PCSK6
Q8WXI7	MUC16	MUC16 CA125	0.863939	Yes	membrane	isExome	extracellular exosome	GO:0070062	--	--	--	MUC16
P42702	LIFR	LIFR	0.863596	No	membrane&secreted	NULL	extracellular exosome	GO:0070062	IPR003961	OSM;LIF;CNTF;CNTF;CNTF	HSPG2;LIF;CNTF;CTF1;OSM;CLCF1;CRLF1;IL11;IL6;LEP;EGF;CSF3;IL23A;IL7;PRL;IFNG;EPO;IL4;IL5;IL10;IL2;CSF2;IL3;IFNB1;IL15;GH1;PDGFA;IL13;PDGFB;IFNK;THPO;IL17D;IFNA1;IL9;IL22;IL19;CSH1;IFNW1;IFNA21;IFNA2;IFNE;IFNA16;IL12A;IFNA17;IFNA5;CSH2;IFNA7;IFNA4;IL12B;IL20;IFNA10;IFNA13;IL24;IFNA8;IFNA6;IFNA14;EGLN1	LIFR
P20774	OGN	OGN OIF SLRR3A	0.863535	Yes	secreted	isExome	extracellular vesicle|collagen-containing extracellular matrix|extracellular region|extracellular space|extracellular exosome|extracellular matrix structural constituent conferring compression resistance	GO:1903561|GO:0062023|GO:0005576|GO:0005615|GO:0070062|GO:0030021	--	--	--	OGN
Q6UXX5	ITIH6	ITIH6 ITIH5L UNQ6369/PRO21074	0.863091	Yes	secreted	NULL	extracellular region	GO:0005576	--	--	--	ITIH6
Q8NF86	PRSS33	PRSS33	0.86301	No	secreted	NULL	extracellular space	GO:0005615	NULL	NULL	NULL	PRSS33
Q13753	LAMC2	LAMC2 LAMB2T LAMNB2	0.86297	Yes	secreted	isExome	collagen-containing extracellular matrix|extracellular region|extracellular matrix structural constituent|extracellular space|extracellular matrix organization	GO:0062023|GO:0005576|GO:0005201|GO:0005615|GO:0030198	--	--	--	LAMC2
P48061	CXCL12	CXCL12 SDF1 SDF1A SDF1B	0.862889	Yes	secreted	NULL	extracellular region|extracellular exosome	GO:0005576|GO:0070062	--	--	--	CXCL12
Q9NYQ6	CELSR1	CELSR1 CDHF9 FMI2	0.862586	No	membrane	NULL	NULL	NULL	IPR001881;IPR002049;IPR001791	NULL	SEMA6C;WNT5A;WNT11;SEMA6B;SEMA6A;WNT16;WNT5B	CELSR1
Q99731	CCL19	CCL19 ELC MIP3B SCYA19	0.862586	Yes	secreted	NULL	extracellular region|extracellular space	GO:0005576|GO:0005615	--	--	--	CCL19
P04628	WNT1	WNT1 INT1	0.862485	Yes	secreted	NULL	extracellular region|extracellular exosome|extracellular space	GO:0005576|GO:0070062|GO:0005615	--	--	--	WNT1
Q7Z5N4	SDK1	SDK1	0.862283	No	membrane	NULL	NULL	NULL	IPR003961	NULL	NTN1;NTN5;SFRP5	SDK1
Q08397	LOXL1	LOXL1 LOXL	0.862242	Yes	secreted	NULL	extracellular space|collagen-containing extracellular matrix|extracellular region	GO:0005615|GO:0062023|GO:0005576	--	--	--	LOXL1
Q9ULB1	NRXN1	NRXN1 KIAA0578	0.862202	No	membrane&secreted	NULL	NULL	NULL	IPR001791	NULL	RELN;NCAN;NTNG1;NTNG2;CBLN1;F10;CBLN2;CBLN4;NRG3;BDNF;CBLN3;SEMA5A	NRXN1
P40238	MPL	MPL TPOR	0.86204	No	membrane	isExome	NULL	NULL	IPR003961	NULL	VWF;THPO;EPO;IL3;CSF3;IL11;CSF2;IL6;IL7;PRL;OSM;PDGFB;LIF;IFNG;IL2;LEP;IL5;CTF1;CSH2;EGF;IL10;CSH1;IL4;KITLG;IL9;IFNA1;CNTF;IL15;IFNA2;IL12A;IL13;PDGFA;GH1;IFNW1;IL22;IFNA5;IL19;IL20;IFNA4;IFNA16;IFNA7;IL23A;IFNA6;IFNA13;IFNA14;IFNE;IL24;IFNA21;IFNB1;IFNA10;IFNA8;IFNA17;IL17D;IFNK;IL12B;PF4;CCL27	MPL
P29508	SERPINB3	SERPINB3 SCCA SCCA1	0.861798	Yes	intracellular	isExome	extracellular region|extracellular exosome|extracellular space	GO:0005576|GO:0070062|GO:0005615	--	--	--	SERPINB3
P26012	ITGB8	ITGB8	0.861778	No	membrane	isExome	extracellular matrix protein binding|extracellular exosome|extracellular matrix organization	GO:1990430|GO:0070062|GO:0030198	NULL	NULL	VTN;LAMA4;COL9A3;COL4A2;COL4A1;LAMA2;LAMC2;LAMA3;COL6A3;LAMB1;COL4A4;COL1A1;VWF;COL4A3;LAMA1;THBS1;RELN;THBS2;COL1A2;COL6A2;SPP1;COL6A6;COL6A1;LAMC1;LAMA5;LAMC3;LAMB4;COL2A1;IBSP;LAMB3;TNR;TNC;COL4A5;LAMB2;TNXB;COL9A1;TNN;COL4A6;THBS4;CHAD;THBS3;COL9A2;COL6A5;COMP;EMILIN1;NPNT;TGFB1;TGFB3;IL1B;HBEGF	ITGB8
P03973	SLPI	SLPI WAP4 WFDC4	0.861636	Yes	secreted	isExome	collagen-containing extracellular matrix|extracellular region|extracellular space|extracellular exosome	GO:0062023|GO:0005576|GO:0005615|GO:0070062	--	--	--	SLPI
Q15661	TPSAB1	TPSAB1 TPS1 TPS2 TPSB1	0.861253	No	secreted	NULL	extracellular space|extracellular matrix disassembly|collagen-containing extracellular matrix|extracellular region	GO:0005615|GO:0022617|GO:0062023|GO:0005576	NULL	NULL	MMP1;CTSC;KITLG;CTSG	TPSAB1
P20231	TPSB2	TPSB2 TPS2	0.861253	No	secreted	NULL	extracellular space|collagen-containing extracellular matrix	GO:0005615|GO:0062023	NULL	NULL	NULL	TPSB2
P36980	CFHR2	CFHR2 CFHL2 FHR2 HFL3	0.860909	No	secreted	NULL	extracellular region	GO:0005576	IPR000436	NULL	NULL	CFHR2
O75056	SDC3	SDC3 KIAA0468	0.860889	Yes	membrane	NULL	collagen-containing extracellular matrix	GO:0062023	--	--	--	SDC3
P28908	TNFRSF8	TNFRSF8 CD30 D1S166E	0.860707	No	membrane	isExome	extracellular exosome	GO:0070062	NULL	NULL	TNFSF8;IL4;SDC1;IL2;TNFSF4;TNF;TNFSF9;IL10;CCL21;FGF19;CXCL13;IL5;TNFSF18;IL6;CCL17;GPC3;TNFSF13B;FASLG	TNFRSF8
O43827	ANGPTL7	ANGPTL7 CDT6 UNQ313/PRO356	0.860485	Yes	secreted	isExome	extracellular region	GO:0005576	--	--	--	ANGPTL7
Q9HCU4	CELSR2	CELSR2 CDHF10 EGFL2 KIAA0279 MEGF3	0.860465	No	membrane	NULL	NULL	NULL	IPR001881;IPR002049;IPR001791	NULL	CILP2;NPNT;SEMA6C;MEGF6;EGFL6;SEMA6B;SEMA6A;WNT11;WNT5B;SEMA6D;ANGPTL3	CELSR2
O60241	ADGRB2	ADGRB2 BAI2	0.860444	No	membrane&secreted	NULL	NULL	NULL	IPR000884	NULL	NULL	ADGRB2
P82987	ADAMTSL3	ADAMTSL3 KIAA1233	0.860424	Yes	secreted	NULL	extracellular region	GO:0005576	--	--	--	ADAMTSL3
Q9Y4C0	NRXN3	NRXN3 C14orf60 KIAA0743	0.860323	No	membrane	NULL	NULL	NULL	IPR001791	NULL	CBLN1;CBLN4;CBLN2;BDNF;CBLN3	NRXN3
P18084	ITGB5	ITGB5	0.859939	No	membrane	isExome	extracellular exosome|extracellular matrix organization	GO:0070062|GO:0030198	IPR002035	ANGPTL4;ANGPTL4;ANGPTL4;ANGPTL4	VTN;CYR61;SPP1;COL4A2;EDIL3;COL18A1;IBSP;LAMA4;LAMC1;MFGE8;LAMB1;COL4A1;COL6A1;LAMA3;COL1A1;LAMC2;LAMA1;COL1A2;LAMB3;COL6A3;COL6A2;LAMA5;LAMA2;THBS1;COL4A5;THBS3;THBS2;COL4A6;COL4A4;LAMB2;VWF;TNC;COL4A3;COL9A1;COL2A1;RELN;LAMC3;COL9A3;TNN;LAMB4;COL6A5;TNR;THBS4;CHAD;COL6A6;TNXB;COL9A2;COMP;EMILIN1;LTBP3;FN1;LTBP1;POSTN;NPNT;TGFB1;SDC1;PLAU;TGFB3;SERPINE1;ADAM9;ADAM19;ADAM15;ANXA5;HBEGF;PCSK5;SERP…	ITGB5
P83105	HTRA4	HTRA4	0.859232	Yes	secreted	NULL	extracellular region	GO:0005576	--	--	--	HTRA4
P20333	TNFRSF1B	TNFRSF1B TNFBR TNFR2	0.858949	No	membrane&secreted	NULL	extracellular region|negative regulation of extracellular matrix constituent secretion	GO:0005576|GO:0003332	NULL	TNF;TNF;SERPINB3	ADIPOQ;TNF;IL10;LTA;ADAM17;TNFSF11;ADAM8;TNFSF13B;LTB;TNFSF12;TNFSF14;ADAM10;CLEC5A;PLAU;CLEC4D;CLEC12A;MMP25;IL6;IL1RN;IL17A;IL2;CCL2;IL1B;CXCL8;IL17F;IFNG;CCL5;CCL4;IL4;INS;FASLG;IL18;CXCL10;VEGFA;CCL3;MMP3;CSF2;IL13;CSF3;TNFSF8;IL15;MMP9;TNFSF10;IL5;IL1A;CXCL9;TIMP1;IL16;CXCL1;IL23A;LEP;IL7;EPO;CSF1;CCL20	TNFRSF1B
P05156	CFI	CFI IF	0.85802	No	secreted	isExome	extracellular region|extracellular space|extracellular exosome	GO:0005576|GO:0005615|GO:0070062	NULL	NULL	FN1;FGA;ECM1;FGG;VTN;COL8A1;HMCN1;EFEMP1;ADAMTS13;SERPING1;SERPINC1;IFNG;MBL2;F13B;SERPIND1;TIMP3;SERPINA10;ITIH3;SERPINA1;HTRA1;KNG1	CFI
Q9NZW4	DSPP	DSPP	0.857677	Yes	secreted	NULL	extracellular region|extracellular matrix|extracellular matrix structural constituent|extracellular matrix organization	GO:0005576|GO:0031012|GO:0005201|GO:0030198	--	--	--	DSPP
Q05996	ZP2	ZP2 ZPA	0.857434	Yes	membrane	NULL	collagen-containing extracellular matrix|extracellular region	GO:0062023|GO:0005576	--	--	--	ZP2
P35625	TIMP3	TIMP3	0.857111	Yes	secreted	isExome	collagen-containing extracellular matrix|extracellular region|extracellular space|extracellular matrix	GO:0062023|GO:0005576|GO:0005615|GO:0031012	--	--	--	TIMP3
P19438	TNFRSF1A	TNFRSF1A TNFAR TNFR1	0.857091	No	membrane&secreted	isExome	extracellular region|negative regulation of extracellular matrix constituent secretion|extracellular space	GO:0005576|GO:0003332|GO:0005615	NULL	TNF;TNF;TNF;TNF;TNF;TNF;TNF;TNF;TNF;TNF;TNF;TNF;TNF;TNF;TNF;TNF;HRG	IGFBP5;FN1;TNF;LTA;IL10;FASLG;IL6;CCL2;ADAM17;TNFSF12;MMP9;IL13;CXCL8;TNFSF10;IL1B;IL2;TNFSF15;LTB;IL1RN;TNFSF9;IL4;TNFSF11;IL18;ANXA5;TNFSF4;CCL5;CSF2;IL17A;TNFSF13B;VEGFA;TNFSF18;INS;CXCL10;IFNG;TNFSF8;TIMP1;IL7;MUC13;CSF3;CXCL12;IL15;CXCL1;EGF;IL3;MUC1;TNFSF14;NGF;IL1A;CXCL9;CCL4;IL5;IFNB1;CSF1;BDNF;CCL3;KITLG;MMP2;MMP3;TNFSF13;CXCL13;LEP;CXCL2;IGF1;FGF2;MMP1	TNFRSF1A
Q14956	GPNMB	GPNMB HGFIN NMB UNQ1725/PRO9925	0.856727	No	membrane&secreted	isExome	NULL	NULL	NULL	NULL	COL18A1;TGFBI;SPP1;LTBP2;LTBP3;HBEGF;ANXA5;S100A6;MMP3;LGALS3;FGF20;MMP12;CTSK	GPNMB
P00738	HP	HP	0.856626	No	secreted	isExome	extracellular region|extracellular exosome|extracellular space	GO:0005576|GO:0070062|GO:0005615	IPR000436	LAMC3;TGM2	LRG1;TNFAIP6;PRG3;FGG;FGB;FGA;ADIPOQ;FN1;VWF;VTN;ELANE;CST3;MMP9;PPBP;MMP8;CXCL1;CTSD;CTSH;SLPI;HPSE;PRSS3;CSTB;TIMP2;CTSZ;CTSS;FLG2;HPX;SERPINA1;A2M;IL6;LPA;ITIH4;ADAMTS13;CTSB;SERPINC1;TNF;AMBP;IL10;INS;CXCL8;KNG1;AGT;SERPINA5;IL1B;SERPINA7;EPO;HRG;SERPINE1;PZP;LEP;CCL2;S100A12;SERPING1;SERPINA6;TIMP1;FCN3;MBL2;IL4;S100A9;SERPINF2;VEGFA;IFNG;IL2;S100A8;F2;MDK	HP
Q8TAD2	IL17D	IL17D UNQ3096/PRO21175	0.856525	Yes	secreted	NULL	extracellular space	GO:0005615	--	--	--	IL17D
P12645	BMP3	BMP3 BMP3A	0.856364	Yes	secreted	isExome	extracellular space|extracellular exosome	GO:0005615|GO:0070062	--	--	--	BMP3
O14514	ADGRB1	ADGRB1 BAI1	0.856343	No	membrane	NULL	extracellular space	GO:0005615	IPR000884	NULL	NULL	ADGRB1
P01037	CST1	CST1	0.856343	Yes	secreted	NULL	extracellular space	GO:0005615	--	--	--	CST1
P22735	TGM1	TGM1 KTG	0.856202	Yes	intracellular	isExome	extracellular exosome	GO:0070062	--	--	--	TGM1
P01008	SERPINC1	SERPINC1 AT3 PRO0309	0.856101	Yes	secreted	isExome	collagen-containing extracellular matrix|extracellular region|extracellular space|extracellular exosome	GO:0062023|GO:0005576|GO:0005615|GO:0070062	--	--	--	SERPINC1
Q6UWB1	IL27RA	IL27RA CRL1 TCCR WSX1 UNQ296/PRO336	0.855636	No	membrane	isExome	NULL	NULL	IPR003961	NULL	EBI3;IL12A;IL17D;IL10;IL6;CNTF;IL11;CTF1;OSM;IL2;IL23A;IL4;IFNG;IL22;IL13;LIF;IL3;CSF2;IL15;IFNB1;IL5;IFNA1;IL24;IFNA21;IL12B;IFNA2;IFNA17;IL9;IL7;EGF;CSF3;IL19;PDGFA;IFNE;GH1;IFNA13;LEP;IFNK;PRL;CSH1;IL20;CSH2;EPO;IFNA6;IFNW1;PDGFB;IFNA16;IFNA5;IFNA8;IFNA4;IFNA7;IFNA14;THPO;IFNA10;IL17A;CRLF1	IL27RA
P01033	TIMP1	TIMP1 CLGI TIMP	0.855131	Yes	secreted	isExome	extracellular region|extracellular exosome|extracellular matrix|extracellular matrix disassembly|extracellular space	GO:0005576|GO:0070062|GO:0031012|GO:0022617|GO:0005615	--	--	--	TIMP1
P02679	FGG	FGG PRO2061	0.854929	Yes	secreted	isExome	collagen-containing extracellular matrix|extracellular region|extracellular exosome|extracellular matrix structural constituent|extracellular space|extracellular matrix organization	GO:0062023|GO:0005576|GO:0070062|GO:0005201|GO:0005615|GO:0030198	--	--	--	FGG
P15941	MUC1	MUC1 PUM	0.854869	Yes	membrane&secreted	isExome	extracellular space|extracellular exosome	GO:0005615|GO:0070062	--	--	--	MUC1
O00585	CCL21	CCL21 SCYA21 UNQ784/PRO1600	0.854848	Yes	secreted	NULL	extracellular region|extracellular space	GO:0005576|GO:0005615	--	--	--	CCL21
P24593	IGFBP5	IGFBP5 IBP5	0.854646	Yes	secreted	NULL	extracellular region|extracellular space	GO:0005576|GO:0005615	--	--	--	IGFBP5
P12429	ANXA3	ANXA3 ANX3	0.854566	Yes	intracellular	isExome	extracellular exosome	GO:0070062	--	--	--	ANXA3
P14210	HGF	HGF HPTA	0.854566	Yes	secreted	isExome	extracellular region|extracellular space	GO:0005576|GO:0005615	--	--	--	HGF
Q92765	FRZB	FRZB FIZ FRE FRP FRZB1 SFRP3	0.853293	Yes	secreted	NULL	extracellular space	GO:0005615	--	--	--	FRZB
Q99062	CSF3R	CSF3R GCSFR	0.852626	No	membrane	NULL	extracellular region	GO:0005576	IPR003961	CSF3	FGL2;CSF3;CSF2;IL3;EGF;IL6;EPO;OSM;THPO;ELANE;CNTF;IL10;IL11;IL12B;IL7;LEP;IL2;IL4;IFNG;LIF;IL12A;IL19;IL5;IL15;CTF1;IFNA1;S100A12;IL13;IL9;IL17D;IFNA17;IL22;PRL;IFNB1;IFNA21;IFNK;IFNA2;IL24;GH1;CSH1;CSH2;IFNE;IL20;IFNA14;PDGFB;IFNA16;IFNA4;PDGFA;IFNA6;IFNA13;IFNA8;IFNA5;IFNA10;IFNA7;IFNW1;IL23A;CTSS;S100A9;FCN1;C1QA;KITLG;S100A8;C1QC	CSF3R
O60462	NRP2	NRP2 VEGF165R2	0.852182	No	membrane&secreted	isExome	extracellular region	GO:0005576	IPR000859	NULL	LAMA1;SLIT1;NTN1;SLIT2;SLIT3;VEGFA;VEGFC;SEMA3F;PLXNA3;PLXNA1;PLXNA4;SEMA3B;PLXNA2;SEMA3A;SEMA3C;PLXNB1;SEMA4F;SEMA3G;SEMA3E;SEMA6A;SEMA6D;SEMA5A;SEMA3D;SEMA5B;SEMA4C;SEMA6B;SEMA4G;SEMA4B;SEMA6C;SEMA4A;SEMA7A;SEMA4D;PGF;PLXND1;VEGFB;PLXNB3;PLXNC1;FIGF;PLXNB2;CLEC4C;HGF	NRP2
O00292	LEFTY2	LEFTY2 EBAF LEFTA LEFTYA TGFB4 PSEC0024	0.851131	Yes	secreted	NULL	collagen-containing extracellular matrix|extracellular region|extracellular space	GO:0062023|GO:0005576|GO:0005615	--	--	--	LEFTY2
Q9H336	CRISPLD1	CRISPLD1 CRISP10 LCRISP1 UNQ342/PRO541	0.851111	Yes	intracellular	isExome	extracellular space|extracellular exosome	GO:0005615|GO:0070062	--	--	--	CRISPLD1
Q86T13	CLEC14A	CLEC14A C14orf27 EGFR5 UNQ236/PRO269	0.850687	Yes	membrane	NULL	extracellular matrix protein binding|extracellular matrix binding|collagen-containing extracellular matrix	GO:1990430|GO:0050840|GO:0062023	--	--	--	CLEC14A
P08887	IL6R	IL6R	0.850667	No	membrane&secreted	NULL	extracellular region	GO:0005576	IPR003961	IL6;IL6;IL6;IL6	LRG1;IL6;IL2;CNTF;OSM;IL10;IL11;LIF;IL4;CTF1;CSF2;IL13;IL15;IFNG;IL3;IL7;IL22;IL5;EGF;CSF3;LEP;IL9;CCL2;IL23A;EPO;IL24;IFNA1;TNF;IL12A;IL19;THPO;IFNA13;IFNB1;IL17D;IFNA2;PDGFB;IL17A;IL12B;SDC1;TNFSF11;PRL;PDGFA;IFNA21;IFNA17;IFNE;IFNA8;IFNA5;IFNW1;IFNA14;GH1;IFNA10;IFNA7;IFNA4;IFNA16;CXCL8;IFNK;CSH2;CSH1;IL20;IFNA6;IL1B;ADAM17;IL1RN;VEGFA;CCL5;IL18;MMP9;TNFSF13B;IL17F;ADAMTS7;IL1A;ADAM10;CXCL1;IN…	IL6R
Q9UIK5	TMEFF2	TMEFF2 HPP1 TENB2 TPEF UNQ178/PRO204	0.850646	No	membrane	NULL	extracellular region	GO:0005576	NULL	NULL	GDF15;SFRP1;EGF;BMP3	TMEFF2
P20718	GZMH	GZMH CGL2 CTSGL2	0.850465	No	secreted	NULL	NULL	NULL	NULL	NULL	IGFALS;IGFBP3;AGT;IGF2;IGF1;CCL5;CTSW;CST7;FGFBP2	GZMH
P07355	ANXA2	ANXA2 ANX2 ANX2L4 CAL1H LPC2D	0.850404	Yes	intracellular	isExome	collagen-containing extracellular matrix|extracellular region|extracellular exosome|extracellular space	GO:0062023|GO:0005576|GO:0070062|GO:0005615	--	--	--	ANXA2
Q9H3S3	TMPRSS5	TMPRSS5	0.850162	No	membrane&secreted	NULL	NULL	NULL	NULL	NULL	NULL	TMPRSS5
Q96FQ6	S100A16	S100A16 S100F AAG13	0.849717	Yes	intracellular	isExome	extracellular space|extracellular exosome	GO:0005615|GO:0070062	--	--	--	S100A16
P02775	PPBP	PPBP CTAP3 CXCL7 SCYB7 TGB1 THBGB1	0.849515	Yes	secreted	isExome	extracellular region|extracellular space	GO:0005576|GO:0005615	--	--	--	PPBP
O14522	PTPRT	PTPRT KIAA0283	0.849253	No	membrane	NULL	NULL	NULL	IPR003961	NULL	HAPLN2;TGFA;FGF1;CBLN4	PTPRT
P06703	S100A6	S100A6 CACY	0.849152	Yes	intracellular	isExome	collagen-containing extracellular matrix|extracellular region|extracellular exosome	GO:0062023|GO:0005576|GO:0070062	--	--	--	S100A6
P21741	MDK	MDK MK1 NEGF2	0.849152	Yes	secreted	isExome	collagen-containing extracellular matrix|extracellular region	GO:0062023|GO:0005576	--	--	--	MDK
Q3B8N2	LGALS9B	LGALS9B	0.84897	Yes	intracellular	isExome	NULL	NULL	--	--	--	LGALS9B
O60486	PLXNC1	PLXNC1 VESPR	0.848848	Yes	membrane	isExome	NULL	NULL	--	--	--	PLXNC1
Q9P2S2	NRXN2	NRXN2 KIAA0921	0.848768	No	membrane&secreted	NULL	NULL	NULL	IPR001791	NULL	PCOLCE;SPARCL1;NCAN;CBLN1;CBLN2;CBLN4;CBLN3	NRXN2
Q9H3T3	SEMA6B	SEMA6B SEMAN SEMAZ UNQ1907/PRO4353	0.848121	Yes	membrane	NULL	extracellular space	GO:0005615	--	--	--	SEMA6B
O14905	WNT9B	WNT9B WNT14B WNT15 UNQ6973/PRO21956	0.84798	Yes	secreted	NULL	extracellular region|extracellular space	GO:0005576|GO:0005615	--	--	--	WNT9B
P09544	WNT2	WNT2 INT1L1 IRP	0.847677	Yes	secreted	NULL	collagen-containing extracellular matrix|extracellular region|extracellular space	GO:0062023|GO:0005576|GO:0005615	--	--	--	WNT2
P49863	GZMK	GZMK TRYP2	0.847677	No	secreted	NULL	extracellular region	GO:0005576	NULL	NULL	FGL2;CCL5;CTSW;CXCL9	GZMK
Q6V0I7	FAT4	FAT4 CDHF14 FATJ Nbla00548	0.847434	No	membrane	isExome	extracellular exosome	GO:0070062	IPR001881;IPR001791	NULL	LAMC1;CTGF;WNT9B;CCBE1;WNT5A	FAT4
P20930	FLG	FLG	0.847253	Yes	intracellular	NULL	collagen-containing extracellular matrix	GO:0062023	--	--	--	FLG
P35590	TIE1	TIE1 TIE	0.84699	No	membrane&secreted	NULL	NULL	NULL	IPR003961	NULL	VWF;FN1;ANGPT2;ANGPT1;ANGPT4;ANGPTL1;VEGFA;ANGPTL2;ANGPTL3;FGF2;VEGFC;EGF;VEGFB;FIGF;PDGFB;FGF1;ANGPTL4;PGF;FGF13;ANGPTL6;ANGPTL7;ANGPTL5	TIE1
Q8IWL2	SFTPA1	SFTPA1 COLEC4 PSAP SFTP1 SFTPA SFTPA1B	0.846626	Yes	secreted	NULL	extracellular region|extracellular space	GO:0005576|GO:0005615	--	--	--	SFTPA1
Q9BUD6	SPON2	SPON2 DIL1 UNQ435/PRO866	0.846545	Yes	secreted	isExome	extracellular exosome|extracellular matrix	GO:0070062|GO:0031012	--	--	--	SPON2
O75888	TNFSF13	TNFSF13 APRIL TALL2 ZTNF2 UNQ383/PRO715	0.846465	Yes	intracellular	isExome	extracellular region|extracellular exosome	GO:0005576|GO:0070062	--	--	--	TNFSF13
P01130	LDLR	LDLR	0.846141	No	membrane&secreted	isExome	NULL	NULL	IPR001881	NULL	ADIPOQ;AGRN;RELN;FN1;ELN;WNT5A;EGF;LPA;INS;LEP;A2M;IL1B;TNF;WNT1;WNT3A;CCL2;MMP2;HGFAC;IL6;ANGPTL3;OSM;SERPINE1;PLG;AGT;WNT7A;WNT11;WNT2;PLAT;PF4;C1QA;WNT6;NRG1;WNT10B;WNT9A;WNT9B;IL10;PLAU;WNT3;VEGFA;TNFSF14;MMP9;WNT2B;WNT4;WNT7B;FRZB;WNT5B;WNT10A;WNT8A	LDLR
Q8IYR6	TMEFF1	TMEFF1 C9orf2	0.845939	No	membrane	NULL	NULL	NULL	NULL	NULL	FGF18;EGF;TDGF1;GDF1	TMEFF1
Q96PL2	TECTB	TECTB	0.845919	Yes	membrane	NULL	extracellular matrix|extracellular region|extracellular matrix structural constituent	GO:0031012|GO:0005576|GO:0005201	--	--	--	TECTB
Q92673	SORL1	SORL1 C11orf32	0.845899	No	membrane	isExome	extracellular exosome|extracellular space	GO:0070062|GO:0005615	IPR003961	NULL	LPA;GDNF;IL6;BDNF;CTSD;A2M	SORL1
O94779	CNTN5	CNTN5	0.845616	No	secreted	isExome	extracellular region	GO:0005576	IPR003961	NULL	NTNG1;NTNG2;TECTA;TECTB;FMOD;EDIL3;CD109;PRL;CSH1;CSH2;GH2;PAMR1;GH1	CNTN5
P23467	PTPRB	PTPRB PTPB	0.84501	No	membrane&secreted	isExome	NULL	NULL	IPR003961	NULL	IGFBP2;FN1;CLEC5A;CLEC12A;ADAM10;CLEC4D;CLEC4C;MMP25;SERPINB6;PLAU;ADAM8;PTN;VEGFA;ANGPT1	PTPRB
P0C091	FREM3	FREM3	0.844848	Yes	secreted	isExome	extracellular space|collagen-containing extracellular matrix	GO:0005615|GO:0062023	--	--	--	FREM3
Q4KMG0	CDON	CDON CDO	0.843657	No	membrane&secreted	NULL	collagen-containing extracellular matrix	GO:0062023	IPR003961	DHH;DHH;IHH	NTN3;COL19A1;DHH;SHH;IHH;HHIP	CDON
Q9NRJ3	CCL28	CCL28 SCYA28	0.843535	Yes	secreted	isExome	extracellular region|extracellular exosome	GO:0005576|GO:0070062	--	--	--	CCL28
P08758	ANXA5	ANXA5 ANX5 ENX2 PP4	0.843515	Yes	intracellular	isExome	collagen-containing extracellular matrix|extracellular region|extracellular exosome	GO:0062023|GO:0005576|GO:0070062	--	--	--	ANXA5
Q99665	IL12RB2	IL12RB2	0.843172	No	membrane&secreted	NULL	NULL	NULL	IPR003961	NULL	IL12B;IL12A;IL4;IL1B;EBI3;IFNG;IL10;IL2;IL13;IL6;IL5;IL22;IL23A;IFNA17;IFNA21;IFNA2;IL15;IFNA1;IL9;IL7;CSF2;IFNB1;IL3;EGF;IL17D;CNTF;CSF3;LIF;IL24;IL11;IFNA13;PRL;IL19;OSM;CTF1;IFNW1;LEP;IFNA10;EPO;PDGFB;IFNK;PDGFA;GH1;THPO;IFNA4;IFNA14;IFNE;IFNA5;IFNA16;IFNA6;IFNA7;CSH2;IL20;IFNA8;CSH1;IL17A;CCL5;IL17F;IL18	IL12RB2
P05106	ITGB3	ITGB3 GP3A	0.842687	No	membrane&secreted	isExome	extracellular matrix binding|extracellular exosome|extracellular matrix organization	GO:0050840|GO:0070062|GO:0030198	NULL	FGG;FGG;ADAM15;CX3CL1;CX3CL1;CX3CL1;CX3CL1;CX3CL1;CX3CL1;CX3CL1	FN1;VTN;VWF;THBS1;SPP1;FGA;FGG;COL1A2;FGB;COL4A2;MFGE8;COL1A1;EDIL3;LAMB1;COL5A1;LAMC1;COL4A1;COL3A1;FBN1;LAMA4;COL7A1;COL18A1;COL5A2;IBSP;COL11A1;TGFBI;COL4A4;COL4A5;COL4A6;COL2A1;COL4A3;COL6A1;COL6A3;COL6A2;COL11A2;COMP;TNC;DMP1;FBN2;FBN3;COL6A5;COL6A6;CYR61;TNN;TNR;TNXB;LAMA1;LAMA2;LAMA3;LAMA5;LAMC2;LAMB3;RELN;LAMB2;LAMC3;THBS2;LAMB4;THBS3;THBS4;CHAD;COL9A3;COL9A1;COL9A2;EMILIN1;NID1;FBLN2;HSP…	ITGB3
Q9H2R5	KLK15	KLK15	0.842626	No	secreted	NULL	extracellular region	GO:0005576	NULL	NULL	KNG1;EGF;NTF4;NGF	KLK15
P07225	PROS1	PROS1 PROS	0.842505	No	membrane&secreted	isExome	extracellular region|extracellular space|extracellular exosome	GO:0005576|GO:0005615|GO:0070062	IPR001881;IPR000294;IPR001791	NULL	FGB;FGG;FGA;FN1;VWF;THBS1;SPARC;MMRN1;GAS6;SRGN;MGP;BGLAP;NCAN;F2;HRG;SERPINA1;A2M;PLG;SERPINF2;F13A1;KNG1;SERPINE1;SERPING1;VEGFA;IGF1;EGF;TIMP1;TGFB2;IGF2;TGFB1;PF4;PPBP;PDGFB;HGF;TGFB3;VEGFC;FIGF;VEGFB;LEFTY2;SERPIND1;SERPINC1;HABP2;F10;F13B;CTSA	PROS1
P40313	CTRL	CTRL CTRL1	0.842222	No	secreted	NULL	extracellular space	GO:0005615	NULL	NULL	CELA3B;CELA2A;CELA2B;CELA3A;MEP1B;ANXA5;ANGPT1;INS;LGALS4	CTRL
O95715	CXCL14	CXCL14 MIP2G NJAC SCYB14 PSEC0212 UNQ240/PRO273	0.842101	Yes	secreted	NULL	extracellular space	GO:0005615	--	--	--	CXCL14
Q9Y6Q6	TNFRSF11A	TNFRSF11A RANK	0.842081	No	membrane&secreted	NULL	NULL	NULL	NULL	TNFSF11;TMPRSS15	BGLAP;TNFSF11;TNF;LTB;TNFSF14;LTA;TNFSF13B;TNFSF12;CTSK;F2;CSF1;TNFSF10;IL6	TNFRSF11A
Q8WUJ3	CEMIP	CEMIP KIAA1199	0.841636	No	secreted	isExome	extracellular region	GO:0005576	NULL	PLXNA2	VWDE;PLXNA2;HYAL2;HYAL1;SPAM1;HABP2	CEMIP
Q99217	AMELX	AMELX AMG AMGX	0.841394	Yes	secreted	NULL	collagen-containing extracellular matrix	GO:0062023	--	--	--	AMELX
Q8WWA0	ITLN1	ITLN1 INTL ITLN LFR UNQ640/PRO1270	0.841374	Yes	secreted	isExome	extracellular region|extracellular exosome	GO:0005576|GO:0070062	--	--	--	ITLN1
P05546	SERPIND1	SERPIND1 HCF2	0.84103	Yes	secreted	isExome	extracellular space|extracellular exosome|extracellular region	GO:0005615|GO:0070062|GO:0005576	--	--	--	SERPIND1
Q12889	OVGP1	OVGP1 MUC9 OGP	0.839778	Yes	secreted	NULL	extracellular region	GO:0005576	--	--	--	OVGP1
Q8N307	MUC20	MUC20 KIAA1359 UNQ2782/PRO7170	0.839717	Yes	secreted	NULL	extracellular region	GO:0005576	--	--	--	MUC20
Q08629	SPOCK1	SPOCK1 SPOCK TIC1 TICN1	0.839515	Yes	secreted	isExome	extracellular matrix binding|extracellular space	GO:0050840|GO:0005615	--	--	--	SPOCK1
Q14624	ITIH4	ITIH4 IHRP ITIHL1 PK120 PRO1851	0.839212	Yes	secreted	isExome	collagen-containing extracellular matrix|extracellular region|extracellular exosome	GO:0062023|GO:0005576|GO:0070062	--	--	--	ITIH4
P54108	CRISP3	CRISP3	0.839212	No	secreted	NULL	extracellular space|extracellular matrix|extracellular region	GO:0005615|GO:0031012|GO:0005576	NULL	NULL	TNFAIP6;PRG3;LRG1;DSPP;SPP1;MEPE;BGLAP;AMBN;MMP8;ELANE;MMP9;CTSS;SLPI;FLG2;CTSD;CTSH;CTSZ;CSTB;PPBP;PRSS3;CST3;CXCL1;HPSE;TIMP2;KNG1;CRNN	CRISP3
O60235	TMPRSS11D	TMPRSS11D HAT	0.838788	No	membrane	isExome	extracellular exosome|extracellular region	GO:0070062|GO:0005576	IPR000082	MST1	AMBN;IL1RN;SERPINA5;IFNK;MST1;IL1A	TMPRSS11D
Q96HF1	SFRP2	SFRP2 FRP2 SARP1 FKSG12 UNQ361/PRO697	0.838323	Yes	secreted	NULL	collagen-containing extracellular matrix|cellular response to extracellular stimulus|extracellular space	GO:0062023|GO:0031668|GO:0005615	--	--	--	SFRP2
O95084	PRSS23	PRSS23 ZSIG13 UNQ270/PRO307	0.838202	No	secreted	isExome	extracellular exosome	GO:0070062	NULL	NULL	FN1;LTBP1;IGFBP7;FBN1;IGFBP3;MATN3;TNC;FGG;CYR61;LAMB1;IGFBP5;VCAN;IGFBP4;LAMC1;LAMB2;GAS6;IGFBP1;VWA1;MFGE8;SPARCL1;DMP1;AMELX;FGA;AMBN;SPP1;MEPE;SERPINC1;FAM20A;FSTL1;TIMP1;IL6;SDC2;LGALS1;ADAM10;FSTL3;SERPINA1;CST3;SERPINA10;CHRDL1;BMP4;CSF1;FGF23;ITIH2;KNG1;BMP15;FAM20C;SERPIND1;GPC3;PLAT;PLAU;HTRA1	PRSS23
Q8N398	VWA5B2	VWA5B2	0.838162	Yes	secreted	NULL	NULL	NULL	--	--	--	VWA5B2
Q96P15	SERPINB11	SERPINB11	0.837576	Yes	intracellular	NULL	extracellular space	GO:0005615	--	--	--	SERPINB11
Q4ZHG4	FNDC1	FNDC1 FNDC2 KIAA1866 MEL4B3	0.837475	Yes	secreted	isExome	extracellular region	GO:0005576	--	--	--	FNDC1
P56703	WNT3	WNT3 INT4	0.837051	Yes	secreted	NULL	extracellular region|extracellular exosome|extracellular matrix|extracellular space	GO:0005576|GO:0070062|GO:0031012|GO:0005615	--	--	--	WNT3
P00749	PLAU	PLAU	0.836747	Yes	secreted	isExome	extracellular region|extracellular exosome|extracellular space	GO:0005576|GO:0070062|GO:0005615	--	--	--	PLAU
Q9GZN4	PRSS22	PRSS22 BSSP4 PRSS26 SP001LA UNQ302/PRO343	0.836646	No	secreted	isExome	extracellular region	GO:0005576	NULL	NULL	VEGFA;MMP25	PRSS22
P05981	HPN	HPN TMPRSS1	0.835879	No	membrane	NULL	extracellular exosome	GO:0070062	NULL	NULL	NELL2;HGF;MST1;F7;IL6;HPX	HPN
P16035	TIMP2	TIMP2	0.835697	Yes	secreted	isExome	collagen-containing extracellular matrix|extracellular region|extracellular matrix|extracellular matrix disassembly|extracellular space	GO:0062023|GO:0005576|GO:0031012|GO:0022617|GO:0005615	--	--	--	TIMP2
P05230	FGF1	FGF1 FGFA	0.835657	Yes	intracellular	NULL	extracellular region|extracellular matrix|extracellular space	GO:0005576|GO:0031012|GO:0005615	--	--	--	FGF1
Q8IZJ1	UNC5B	UNC5B P53RDL1 UNC5H2 UNQ1883/PRO4326	0.835636	No	membrane	NULL	NULL	NULL	IPR000884	NTN1;NTN1;NTN1	NTN1;NTN4;NTN3;SLIT3;SLIT2;NTNG1;NTNG2;SLIT1;NTN5;VEGFA;SEMA6D;SEMA6C;SEMA6A;SEMA3E;SEMA3G;SEMA3F;SEMA3C;SEMA3A;PLXND1;SEMA4D;PLXNB1;SEMA4G;SEMA7A;PLXNB3;SEMA4C;SEMA3B;SEMA6B;SEMA4B;SEMA3D;SEMA4A;SEMA4F	UNC5B
Q99584	S100A13	S100A13	0.835596	Yes	intracellular	isExome	extracellular region|extracellular space	GO:0005576|GO:0005615	--	--	--	S100A13
Q9Y6C2	EMILIN1	EMILIN1 EMI	0.835253	Yes	secreted	isExome	collagen-containing extracellular matrix|positive regulation of extracellular matrix assembly|extracellular region|extracellular exosome|extracellular matrix constituent conferring elasticity|extracellular matrix|extracellular space	GO:0062023|GO:1901203|GO:0005576|GO:0070062|GO:0030023|GO:0031012|GO:0005615	--	--	--	EMILIN1
O75900	MMP23A	MMP23A MMP21; MMP23B MMP21 MMP22	0.835253	Yes	NULL	NULL	extracellular space|collagen-containing extracellular matrix|extracellular matrix organization|extracellular matrix	GO:0005615|GO:0062023|GO:0030198|GO:0031012	--	--	--	MMP23A
Q05315	CLC	CLC LGALS10 LGALS10A	0.83501	Yes	intracellular	isExome	collagen-containing extracellular matrix	GO:0062023	--	--	--	CLC
P13611	VCAN	VCAN CSPG2	0.834727	Yes	secreted	isExome	collagen-containing extracellular matrix|extracellular region|extracellular matrix structural constituent conferring compression resistance|extracellular matrix|extracellular space|extracellular matrix organization	GO:0062023|GO:0005576|GO:0030021|GO:0031012|GO:0005615|GO:0030198	--	--	--	VCAN
Q86YD5	LDLRAD3	LDLRAD3	0.834081	No	membrane	NULL	NULL	NULL	NULL	NULL	PAMR1	LDLRAD3
Q53EL9	SEZ6	SEZ6	0.83404	No	membrane	NULL	NULL	NULL	IPR000859;IPR000436	NULL	NULL	SEZ6
P04083	ANXA1	ANXA1 ANX1 LPC1	0.833899	Yes	intracellular	isExome	collagen-containing extracellular matrix|extracellular region|extracellular exosome|extracellular space	GO:0062023|GO:0005576|GO:0070062|GO:0005615	--	--	--	ANXA1
Q12836	ZP4	ZP4 ZPB	0.833778	Yes	membrane	NULL	extracellular region	GO:0005576	--	--	--	ZP4
Q8N423	LILRB2	LILRB2 ILT4 LIR2 MIR10	0.833414	No	membrane	NULL	extracellular space	GO:0005615	NULL	ANGPTL2;ANGPTL2;ANGPTL2;ANGPTL2;ANGPTL2;ANGPTL5;ANGPTL5;ANGPTL5;ANGPTL5;ANGPTL5	FGL2;CLEC12A;CLEC5A;CLEC4D;ADAM8;CLEC4C;SERPINB6;PLAU;ADAM10;ANGPTL2;FCN1;IL10;C1QA;CLEC4A;ANGPTL5;ANGPTL4;CCL4;C1QB;IL4;S100A9;CTSS;S100A8;CLEC4E;F13A1;S100A12;VEGFC;INS;CLEC7A;TNF;ANGPTL1;CLEC10A	LILRB2
Q9UKR0	KLK12	KLK12 KLKL5 UNQ669/PRO1303	0.833212	No	secreted	NULL	extracellular space|extracellular region	GO:0005615|GO:0005576	NULL	NULL	KNG1;EGF;NTF4;NGF;FLG	KLK12
Q86WD7	SERPINA9	SERPINA9 GCET1 SERPINA11 UNQ692/PRO1337	0.833091	Yes	secreted	NULL	extracellular space	GO:0005615	--	--	--	SERPINA9
P10643	C7	C7	0.83303	No	secreted	isExome	extracellular exosome|extracellular region	GO:0070062|GO:0005576	IPR000436;IPR000884	NULL	VTN;ITIH3;HRG;PLG;SERPING1	C7
Q5FYA8	ARSH	ARSH	0.832626	No	membrane	NULL	NULL	NULL	NULL	NULL	HSPG2;SULF1;SULF2;GPC1;CTSA;GPC3	ARSH
P06127	CD5	CD5 LEU1	0.832384	No	membrane&secreted	isExome	NULL	NULL	NULL	NULL	IL4;IL7;SDC1;IL6;IL10;IL2;TNFSF13B;ANXA5;TNF;IL17A;IL5;CXCL13;CSF2;IFNG;IL15;IL3;IL13;PCSK5;SERPING1;FASLG;SERPINA9	CD5
Q9BY76	ANGPTL4	ANGPTL4 ARP4 HFARP PGAR PP1158 PSEC0166 UNQ171/PRO197	0.832242	Yes	secreted	isExome	extracellular region|extracellular space	GO:0005576|GO:0005615	--	--	--	ANGPTL4
Q8IZA0	KIAA0319L	KIAA0319L AAVR KIAA1837 PP791	0.832081	No	membrane	isExome	NULL	NULL	NULL	NULL	EPGN	KIAA0319L
P28300	LOX	LOX	0.831939	Yes	secreted	NULL	extracellular region|extracellular space|extracellular matrix	GO:0005576|GO:0005615|GO:0031012	--	--	--	LOX
P05155	SERPING1	SERPING1 C1IN C1NH	0.831879	Yes	secreted	isExome	collagen-containing extracellular matrix|extracellular region|extracellular space|extracellular exosome	GO:0062023|GO:0005576|GO:0005615|GO:0070062	--	--	--	SERPING1
Q8TDW7	FAT3	FAT3 CDHF15 KIAA1989	0.831677	No	membrane	NULL	NULL	NULL	IPR001881;IPR001791	NULL	LAMC1;LAMA1;PLXNA4;EGF	FAT3
P02675	FGB	FGB	0.831636	Yes	secreted	isExome	extracellular vesicle|collagen-containing extracellular matrix|extracellular region|extracellular exosome|extracellular matrix structural constituent|extracellular space|extracellular matrix organization	GO:1903561|GO:0062023|GO:0005576|GO:0070062|GO:0005201|GO:0005615|GO:0030198	--	--	--	FGB
Q96SM3	CPXM1	CPXM1 CPX1 CPXM UNQ3015/PRO9782	0.831313	No	secreted	NULL	extracellular space	GO:0005615	NULL	NULL	ADAM12	CPXM1
Q15465	SHH	SHH	0.831212	Yes	secreted	NULL	collagen-containing extracellular matrix|extracellular region|extracellular space	GO:0062023|GO:0005576|GO:0005615	--	--	--	SHH
Q99218	AMELY	AMELY AMGL AMGY	0.831152	Yes	secreted	NULL	collagen-containing extracellular matrix	GO:0062023	--	--	--	AMELY
P43146	DCC	DCC IGDCC1	0.830869	No	membrane	NULL	NULL	NULL	IPR003961	NTN1;NTN1;NTN1;NTN1;NTN4;CTSV;SFRP2	NTN1;NTN4;SLIT2;SLIT1;SLIT3;NTN5;NTNG1;NTNG2;NTN3;SEMA6D;SEMA5A;SEMA6C;SEMA6A;SEMA5B;SEMA3A;SEMA3F;SEMA3C;SEMA3D;SEMA4G;SEMA6B;SEMA7A;SEMA4D;SEMA4C;SEMA3E;SEMA3G;SEMA4B;SEMA4A;SEMA3B;BMP3;SEMA4F;CBLN3	DCC
P40189	IL6ST	IL6ST	0.830707	No	membrane&secreted	isExome	extracellular region|extracellular exosome	GO:0005576|GO:0070062	IPR003961	OSM;LIF;LIF;CNTF	SMOC1;IL6;LIF;OSM;IL11;CNTF;CTF1;CLCF1;EBI3;IL12A;CRLF1;IL10;IL3;IFNG;IL4;LEP;IL2;IL13;IL15;EGF;CSF2;IL5;IFNA13;IFNA1;IL12B;IFNB1;CSF3;IL9;IFNA2;EPO;IL7;IL19;IL17D;IFNA21;IL22;IL24;PDGFA;PRL;PDGFB;IFNA17;IFNA4;THPO;IFNA14;IL23A;IFNA7;IFNA16;IFNA10;IFNA8;CSH1;GH1;CSH2;IL20;IFNA6;IFNK;IFNE;IFNW1;IFNA5;ANGPTL3;KITLG	IL6ST
Q7Z4P5	GDF7	GDF7	0.830465	Yes	secreted	NULL	extracellular space	GO:0005615	--	--	--	GDF7
P18075	BMP7	BMP7 OP1	0.830242	Yes	secreted	isExome	collagen-containing extracellular matrix|extracellular region|extracellular space	GO:0062023|GO:0005576|GO:0005615	--	--	--	BMP7
O43405	COCH	COCH COCH5B2 UNQ257/PRO294	0.829899	Yes	secreted	isExome	extracellular space|collagen-containing extracellular matrix|extracellular matrix	GO:0005615|GO:0062023|GO:0031012	--	--	--	COCH
P15529	CD46	CD46 MCP MIC10	0.829717	No	membrane	isExome	sequestering of extracellular ligand from receptor|extracellular exosome	GO:0035581|GO:0070062	IPR000436	NULL	VTN;VWF;ADAMTS13;IL2;IL6;IL4;SERPING1;MBL2;F10;IL10;MASP2;MASP1;TNF;LGALS7	CD46
Q969Z4	RELT	RELT TNFRSF19L	0.829475	No	membrane&secreted	NULL	NULL	NULL	NULL	NULL	TSKU;LTB;REG4	RELT
Q9NQS3	NECTIN3	NECTIN3 PRR3 PVRL3	0.829354	No	membrane	NULL	NULL	NULL	NULL	NULL	NULL	NECTIN3
Q8TDF5	NETO1	NETO1 BTCL1	0.829091	No	membrane&secreted	NULL	extracellular region	GO:0005576	IPR000859	NULL	PRSS12;PLXNB3	NETO1
P17643	TYRP1	TYRP1 CAS2 TYRP TYRRP	0.828929	No	membrane&secreted	isExome	NULL	NULL	NULL	NULL	CTGF;CTSB;CTSL;ADAMTSL1;KITLG;CST3;ANXA5	TYRP1
P31151	S100A7	S100A7 PSOR1 S100A7C	0.828828	Yes	intracellular	isExome	collagen-containing extracellular matrix|extracellular region|extracellular space	GO:0062023|GO:0005576|GO:0005615	--	--	--	S100A7
Q99650	OSMR	OSMR OSMRB	0.828828	No	membrane&secreted	isExome	NULL	NULL	IPR003961	NULL	OSM;LIF;CTF1;CNTF;CSF3;IL11;IL6;IFNG;IL3;IL13;IFNW1;IL4;IFNA14;EGF;PDGFB;IL5;IL10;IL7;CSF2;IL15;IFNA16;PRL;PDGFA;IFNA7;IFNA10;IFNA8;LEP;IL2;IL19;IFNK;IFNA4;IFNA6;IFNE;IL24;IFNA2;EPO;IFNA13;IFNA1;IL9;IL22;IFNA17;IFNA21;IL12B;IFNA5;CSH2;IL20;IL23A;CSH1;THPO;IL17D;GH1;IL12A;IFNB1;CLCF1	OSMR
Q02246	CNTN2	CNTN2 AXT TAG1 TAX1	0.828465	No	secreted	NULL	NULL	NULL	IPR003961	NULL	NCAN;LGI1;HAPLN2;GLDN;NTN1;RELN;SLIT1;FN1;LGI3;ADAM22;IL2;SEMA3A;SEMA3D;VEGFA;C1QL2;WNT7A;SEMA6A;PLXNA4;SEMA5B;SEMA6D;SEMA6C;CBLN1	CNTN2
P0C862	C1QTNF9	C1QTNF9 C1QTNF9A UNQ6503/PRO21380	0.828303	Yes	secreted	NULL	extracellular region	GO:0005576	--	--	--	C1QTNF9
P05543	SERPINA7	SERPINA7 TBG	0.828202	Yes	secreted	isExome	extracellular space|extracellular exosome|extracellular region	GO:0005615|GO:0070062|GO:0005576	--	--	--	SERPINA7
Q8N8Z6	DCBLD1	DCBLD1	0.82804	No	membrane	NULL	NULL	NULL	IPR000859;IPR004043	NULL	LEPREL2	DCBLD1
E7EML9	PRSS44	PRSS44 TESSP4	0.82798	No	NULL	NULL	extracellular space	GO:0005615	NULL	NULL	NULL	PRSS44
Q8NHL6	LILRB1	LILRB1 ILT2 LIR1 MIR7	0.82796	No	membrane	NULL	extracellular region	GO:0005576	NULL	NULL	IL10;IL2;TNF;INS;IL15	LILRB1
Q9P232	CNTN3	CNTN3 KIAA1496 PANG	0.82796	No	secreted	NULL	extracellular region	GO:0005576	IPR003961	NULL	NTNG1;NTNG2;TECTA;TECTB;NTN5;FBLN7;CD109;WNT7A;MEGF11	CNTN3
O75973	C1QL1	C1QL1 C1QRF CRF CTRP14	0.82796	Yes	secreted	NULL	NULL	NULL	--	--	--	C1QL1
P0DOX4			0.827818	No	NULL	NULL	NULL	NULL	--	--	--
Q16363	LAMA4	LAMA4	0.827758	Yes	secreted	isExome	collagen-containing extracellular matrix|extracellular region|extracellular matrix structural constituent|extracellular exosome|extracellular matrix organization	GO:0062023|GO:0005576|GO:0005201|GO:0070062|GO:0030198	--	--	--	LAMA4
O75023	LILRB5	LILRB5 LIR8	0.827717	No	membrane	NULL	NULL	NULL	NULL	NULL	ANGPTL5;ANGPTL7;ANGPTL1	LILRB5
Q9HCY8	S100A14	S100A14 S100A15	0.827535	Yes	intracellular	isExome	extracellular exosome	GO:0070062	--	--	--	S100A14
Q16651	PRSS8	PRSS8	0.827414	No	membrane&secreted	isExome	extracellular region|extracellular space|extracellular exosome	GO:0005576|GO:0005615|GO:0070062	NULL	NULL	FLG;SERPINE2;TLL2;ASTL;TLL1;SERPINB9;SERPINA5	PRSS8
P07202	TPO	TPO	0.827212	Yes	membrane&secreted	NULL	extracellular space	GO:0005615	--	--	--	TPO
Q8NCF0	CLEC18C	CLEC18C MRLP3	0.827111	Yes	secreted	NULL	extracellular space	GO:0005615	--	--	--	CLEC18C
P61812	TGFB2	TGFB2	0.826727	Yes	secreted	isExome	collagen-containing extracellular matrix|extracellular region|extracellular space	GO:0062023|GO:0005576|GO:0005615	--	--	--	TGFB2
Q8NI17	IL31RA	IL31RA CRL3 GPL UNQ6368/PRO21073/PRO21384	0.826626	No	membrane&secreted	NULL	NULL	NULL	IPR003961	NULL	LIF;IL11;OSM;CSF3;F2	IL31RA
P07478	PRSS2	PRSS2 TRY2 TRYP2	0.826465	Yes	secreted	NULL	extracellular matrix disassembly|extracellular region|extracellular space|extracellular matrix	GO:0022617|GO:0005576|GO:0005615|GO:0031012	--	--	--	PRSS2
Q6UXZ4	UNC5D	UNC5D KIAA1777 UNC5H4 UNQ6012/PRO34692	0.826263	No	membrane	isExome	NULL	NULL	IPR000884	NULL	NTN1;NTNG1;NTNG2;NTN3;NTN4;NTN5;PLXNB3;PLXNB1;SEMA3C;PLXNC1;SEMA3A;SEMA3G	UNC5D
P34059	GALNS	GALNS	0.825859	No	secreted	NULL	extracellular exosome|extracellular region	GO:0070062|GO:0005576	NULL	NULL	COL2A1;ELN;CTSA;HYAL4;HYAL1;SPAM1;CTSC;CTSG;ANXA2;ELANE;HRNR;S100A7;SERPINB3;GPC1	GALNS
Q8NCW0	KREMEN2	KREMEN2 KRM2	0.825838	No	membrane&secreted	NULL	NULL	NULL	IPR000859	NULL	RSPO1;WNT1;WNT3A;WNT8A;WNT8B;SFRP2	KREMEN2
Q9UMZ3	PTPRQ	PTPRQ	0.825576	No	membrane	NULL	NULL	NULL	IPR003961	NULL	OTOG;PAPPA	PTPRQ
Q96PD2	DCBLD2	DCBLD2 CLCP1 ESDN	0.825475	No	membrane	isExome	NULL	NULL	IPR000859;IPR004043	NULL	SEMA4B;VEGFC;VEGFA	DCBLD2
Q03591	CFHR1	CFHR1 CFHL CFHL1 CFHL1P CFHR1P FHR1 HFL1 HFL2	0.825414	No	secreted	NULL	extracellular space|extracellular region	GO:0005615|GO:0005576	IPR000436	NULL	VTN;HMCN1;ADAMTS13;MASP2;MBL2;SERPING1;PLG;TNFSF13	CFHR1
Q5JXA9	SIRPB2	SIRPB2 PTPN1L PTPNS1L3	0.825394	No	membrane	NULL	NULL	NULL	NULL	NULL	SEMA4A;PIK3IP1	SIRPB2
Q14314	FGL2	FGL2	0.825394	Yes	secreted	isExome	extracellular exosome|collagen-containing extracellular matrix|extracellular region|extracellular matrix structural constituent	GO:0070062|GO:0062023|GO:0005576|GO:0005201	--	--	--	FGL2
P36941	LTBR	LTBR D12S370 TNFCR TNFR3 TNFRSF3	0.825212	No	membrane&secreted	NULL	NULL	NULL	NULL	TNFSF14;TNFSF14;TNFSF14	MFGE8;LTA;LTB;TNFSF14;TNF;TNFSF11;TNFSF13B;TNFSF12;CXCL13;CXCL8;CCL21;CCL19;TNFSF15	LTBR
Q9BQ16	SPOCK3	SPOCK3 TICN3 UNQ409/PRO771	0.82497	Yes	secreted	NULL	extracellular matrix binding|extracellular space	GO:0050840|GO:0005615	--	--	--	SPOCK3
Q6UWX4	HHIPL2	HHIPL2 HHIP3 KIAA1822L UNQ841/PRO1779	0.824788	No	secreted	NULL	extracellular region	GO:0005576	NULL	NULL	NTN5	HHIPL2
P42701	IL12RB1	IL12RB1 IL12R IL12RB	0.824687	No	membrane&secreted	NULL	NULL	NULL	IPR003961	IL23A	HMCN2;IL12B;IL4;IL23A;IL12A;IL1B;IFNG;IL10;IL2;IL6;IL15;IL5;IL13;IL22;IL18;CSF2;IL7;IL9;IFNA1;IFNA21;IFNA17;IFNA2;IFNB1;CSF3;IL3;IL11;LIF;CNTF;IL19;IFNW1;EGF;OSM;IL17D;IFNE;IFNA10;IFNA13;IFNA16;IL24;IFNK;IL17A;IFNA14;IFNA5;IFNA7;IFNA8;CTF1;IFNA6;IFNA4;LEP;EPO;PDGFB;CSH1;IL20;GH1;THPO;CSH2;PRL;PDGFA;IL17F;TNF;CLEC7A	IL12RB1
P08138	NGFR	NGFR TNFRSF16	0.824646	No	membrane	isExome	extracellular region	GO:0005576	NULL	NGF;NGF;ANXA7	ESM1;FN1;NGF;NTF3;BDNF;NTF4;ADAM17;VEGFA;FGF2;EGF;INS;IGF1;KITLG;HGF;FGF8;FGF10;IGF2;ANGPT2;FGF1;PDGFB;FGF7;FGF4;ANGPT1;FGF3;FGF22;PDGFA;FGF19;FGF6;VEGFC;FGF9;FGF21;FGF5;CSF1;AREG;PGF;FLT3LG;FGF13;FGF17;FGF20;EREG;FGF18;VEGFB;FIGF;TGFA;FGF16;PDGFD;FGF23;PDGFC;ANGPT4;GDNF;IL2;SEMA3A;CNTF;SERPINE1;TNF	NGFR
B2RUY7	VWC2L	VWC2L	0.824586	Yes	secreted	NULL	extracellular space	GO:0005615	--	--	--	VWC2L
Q14005	IL16	IL16	0.823879	Yes	intracellular	NULL	extracellular region|extracellular space	GO:0005576|GO:0005615	--	--	--	IL16
Q8NHM4	PRSS3P2	PRSS3P2 T6 TRY6	0.823758	No	NULL	NULL	extracellular space	GO:0005615	NULL	NULL	HAPLN3;MMP9;REG3A;REG3G;ELANE;CTSG;SERPINB3;MMP1;CTSA;ANXA2;CTSC;HRNR;S100A7;PRSS1;PRSS3;AMBP;SERPINA1;MBL2;HTRA1;CELA3A;FCN2;INS;SLPI;FCN1	PRSS3P2
P05107	ITGB2	ITGB2 CD18 MFI7	0.823455	No	membrane&secreted	isExome	extracellular vesicle|extracellular exosome|extracellular matrix organization	GO:1903561|GO:0070062|GO:0030198	NULL	CX3CL1	FGA;CTGF;CYR61;SPON2;TGFBI;FGG;FGB;SRGN;EMILIN1;FN1;LAMA2;LAMA1;THBS4;LAMC1;VTN;FGL2;EDIL3;NPNT;ESM1;COL5A1;LAMB1;ADAM8;MMP9;KNG1;CLEC5A;CLEC12A;MMP25;IL13;PLAU;MMP2;CLEC4D;PLG;ADAM10;SERPINB6;PLAT;F10;MST1;LPA;CLEC4C;CTSS;C1QA;C1QB;C1QC;TNF;S100A9;S100A8;LGALS9;CX3CL1;CCL4;IL16;CXCL8;CST7;TGFB1;CCL3;S100A12;CCL5;IL1B;CCL2;IL2;IL6;HBEGF;TNFSF10;LTB;CXCL1	ITGB2
Q6UY11	DLK2	DLK2 EGFL9 UNQ2903/PRO28633	0.823313	No	membrane	NULL	NULL	NULL	IPR001881	ADAMTSL4	MEGF9;EGFL7;EGFL8	DLK2
Q15063	POSTN	POSTN OSF2	0.822646	Yes	secreted	isExome	collagen-containing extracellular matrix|extracellular matrix|extracellular matrix structural constituent|extracellular space|extracellular matrix organization	GO:0062023|GO:0031012|GO:0005201|GO:0005615|GO:0030198	--	--	--	POSTN
Q93038	TNFRSF25	TNFRSF25 APO3 DDR3 DR3 TNFRSF12 WSL WSL1 UNQ455/PRO779	0.822566	No	membrane&secreted	NULL	extracellular region	GO:0005576	NULL	TNFSF15	TNFSF15;TNFSF12;TNF;INS;IL18;TNFSF10;FASLG;IL2;LTA;TGM2;TNFSF8;TPO;IL10;IL4;IL17A;IL6;TNFSF4	TNFRSF25
Q6UW60	PCSK4	PCSK4 PC4 UNQ2757/PRO6496	0.822404	No	membrane&secreted	NULL	NULL	NULL	NULL	NULL	IGF2;ADAM2;AMH;INS-IGF2	PCSK4
Q8IWU5	SULF2	SULF2 KIAA1247 UNQ559/PRO1120	0.82198	Yes	secreted	isExome	extracellular space	GO:0005615	--	--	--	SULF2
Q9H7L2	KIR3DX1	KIR3DX1 KIR3DL0 LENG12	0.82198	No	secreted	NULL	extracellular region	GO:0005576	NULL	NULL	NULL	KIR3DX1
Q86UX2	ITIH5	ITIH5 KIAA1953 PP14776 UNQ311/PRO354	0.821939	Yes	secreted	NULL	collagen-containing extracellular matrix	GO:0062023	--	--	--	ITIH5
P14616	INSRR	INSRR IRR	0.821697	No	membrane	isExome	NULL	NULL	IPR003961	NULL	INS;IGF1;EGF;PDGFD;PDGFA;PDGFC;PDGFB;TGFA;IGF2	INSRR
P08697	SERPINF2	SERPINF2 AAP PLI	0.821576	Yes	secreted	isExome	collagen-containing extracellular matrix|extracellular region|extracellular exosome|extracellular space	GO:0062023|GO:0005576|GO:0070062|GO:0005615	--	--	--	SERPINF2
O95633	FSTL3	FSTL3 FLRG UNQ674/PRO1308	0.821354	Yes	secreted	NULL	extracellular region|extracellular space	GO:0005576|GO:0005615	--	--	--	FSTL3
A6NIE9	PRSS29P	PRSS29P ISP2	0.82099	No	NULL	NULL	extracellular space	GO:0005615	NULL	NULL	NULL	PRSS29P
P14679	TYR	TYR	0.820768	No	membrane	NULL	NULL	NULL	NULL	NULL	IGFBP1;FGG;TPO;F2;AMBP;GDF3;KITLG;LOX;IL2;CSF2;SERPINA7;VEGFA;CSPG4;FGF2;INS	TYR
P56705	WNT4	WNT4 UNQ426/PRO864	0.820525	Yes	membrane	NULL	extracellular region|extracellular exosome|extracellular matrix|extracellular space	GO:0005576|GO:0070062|GO:0031012|GO:0005615	--	--	--	WNT4
P40126	DCT	DCT TYRP2	0.820465	No	membrane	isExome	NULL	NULL	NULL	NULL	IGFBP1;AMBP;CSF2;CD209;IL10;IL2;ITIH2;IL4;PLXNA4;TNF;IL6;IL17A;KITLG	DCT
Q86VR7	VSIG10L	VSIG10L	0.820404	No	membrane	NULL	NULL	NULL	NULL	NULL	TSKU;MUC12	VSIG10L
P49862	KLK7	KLK7 PRSS6 SCCE	0.82	No	secreted	isExome	extracellular space|extracellular matrix disassembly|extracellular region	GO:0005615|GO:0022617|GO:0005576	NULL	TGFB1	COL17A1;A2ML1;FLG;KNG1;EGF;CTSC;SERPINA12;TGM1;SLPI;FLG2;CST6	KLK7
P56704	WNT3A	WNT3A	0.819939	Yes	secreted	NULL	extracellular region|extracellular exosome|extracellular space|extracellular matrix organization	GO:0005576|GO:0070062|GO:0005615|GO:0030198	--	--	--	WNT3A
Q9UBV4	WNT16	WNT16	0.819636	Yes	secreted	NULL	extracellular region|extracellular space	GO:0005576|GO:0005615	--	--	--	WNT16
P31371	FGF9	FGF9	0.819414	Yes	intracellular	NULL	extracellular region|extracellular space	GO:0005576|GO:0005615	--	--	--	FGF9
Q14626	IL11RA	IL11RA	0.819091	No	membrane&secreted	NULL	NULL	NULL	IPR003961	IL11	IL11;IL13;IL6;CNTF;IL4;IL3;IL2;IL5;CSF2;OSM;IFNG;LIF;CTF1;IL10;IL19;IL15;IL9;IL24;IL17D;IL22;CSF3;IFNA2;EGF;LEP;IL7;IFNB1;IL12A;PRL;IFNA8;IFNA10;IFNA5;EPO;IL20;IFNW1;IFNA4;THPO;IL23A;IFNA13;PDGFA;IL12B;PDGFB;IFNA6;GH1;IFNA17;CSH2;IFNK;IFNA14;IFNA7;IFNA1;IFNA16;IFNE;IFNA21;CSH1	IL11RA
Q9UBG3	CRNN	CRNN C1orf10 DRC1 PDRC1 SEP53	0.81903	Yes	intracellular	isExome	extracellular exosome	GO:0070062	--	--	--	CRNN
P22897	MRC1	MRC1 CLEC13D CLEC13DL MRC1L1	0.818364	No	membrane	NULL	NULL	NULL	IPR001304;IPR000562	NULL	ADIPOQ;IL4;IL13;IL6;IL10;CSF2;TNF;CCL18;CCL2;CSF1;IL1B;CCL22;CCL17;MMP13;CXCL10;C1QB;C1QC;CCL5;IL3;CLEC10A;VEGFA;IL17A;CCL3;LGALS9;CXCL8;LGALS3;C1QA;CLEC2B;INS;CXCL9;F13A1;IFNG;CCL24;CLEC5A;CCL4;IL18;CXCL1;IL2;MMP12;IL5;CCL7;IGF1;CCL8;CXCL12	MRC1
Q5SZI1	LDLRAD2	LDLRAD2	0.818263	No	secreted	NULL	NULL	NULL	NULL	NULL	LOXL3;PRSS12	LDLRAD2
P08F94	PKHD1	PKHD1 FCYT TIGM1	0.818202	No	membrane&secreted	isExome	extracellular exosome	GO:0070062	NULL	NULL	PLXNC1;PLXNB2;PLXND1;PLXNB3;PLXNA3;PLXNA1;PLXNA4;PLXNA2;PLXNB1	PKHD1
P15502	ELN	ELN	0.81798	Yes	secreted	NULL	collagen-containing extracellular matrix|extracellular region|extracellular matrix structural constituent|extracellular matrix organization|extracellular matrix constituent conferring elasticity|extracellular matrix	GO:0062023|GO:0005576|GO:0005201|GO:0030198|GO:0030023|GO:0031012	--	--	--	ELN
P26842	CD27	CD27 TNFRSF7	0.817455	No	membrane	NULL	extracellular region	GO:0005576	NULL	NULL	IL2;IL10;TNF;IL7;TNFSF13B;IL15;SDC1;TNFSF9;IL17A;IL4;TNFSF4;TNFSF8;IFNG;IL6;FASLG;CSF2;CXCL13;TNFSF18;IL5;ANXA5;PCSK5;IL13;IL18;CCL19;CCL5;S100B;CXCL9;CXCL10;CCL4;AMBP;ITIH4;TNFSF10	CD27
Q9NS85	CA10	CA10 hucep-15 UNQ533/PRO1076	0.817434	No	secreted	NULL	NULL	NULL	NULL	NULL	BGLAP;SPP1;HAPLN2;AMELX;NCAN;IBSP;CBLN4;CBLN1	CA10
Q2L4Q9	PRSS53	PRSS53	0.817374	No	secreted	NULL	extracellular region	GO:0005576	NULL	NULL	FGA;TCHHL1	PRSS53
Q15262	PTPRK	PTPRK PTPK	0.816949	No	membrane	isExome	NULL	NULL	IPR003961	LOX;LOX;LOX;LOX	RSPO3;RSPO2;RSPO1;FN1;EGF;PLXNB1	PTPRK
P04070	PROC	PROC	0.816828	No	secreted	NULL	extracellular region|extracellular space	GO:0005576|GO:0005615	IPR001881;IPR000294	MMP15;MMP15	FGA;FGG;FGB;VWF;IGFBP1;FBN1;TNC;FN1;SPP1;IGFBP4;MFGE8;MATN3;IGFBP3;AMELX;LAMC1;DMP1;IGFBP5;MEPE;LAMB1;VCAN;VWA1;SPARCL1;LAMB2;LTBP1;CYR61;GAS6;AMBN;IGFBP7;COL19A1;COL4A4;F2;SERPINC1;SERPINA10;SERPINA5;SERPIND1;ITIH2;PF4;F13B;SERPINA1;KNG1;IL6;F10;CST3;F13A1;TIMP1;GPC3;SERPINF2;FAM20C;FAM20A;FSTL3;SDC2;ADAM10;PF4V1;FSTL1;CSF1;FGF23;LGALS1;BMP4;CHRDL1;BMP15;SERPINE1;A2M;SERPINB2;HRG;F12;MBL2;HGFAC;…	PROC
P21815	IBSP	IBSP BNSP	0.816808	Yes	secreted	NULL	extracellular space|extracellular matrix organization|extracellular region	GO:0005615|GO:0030198|GO:0005576	--	--	--	IBSP
P17931	LGALS3	LGALS3 MAC2	0.816768	Yes	intracellular	isExome	collagen-containing extracellular matrix|extracellular region|extracellular exosome|extracellular space	GO:0062023|GO:0005576|GO:0070062|GO:0005615	--	--	--	LGALS3
Q9H1U4	MEGF9	MEGF9 EGFL5 KIAA0818 UNQ671/PRO1305	0.816283	Yes	membrane	NULL	NULL	NULL	--	--	--	MEGF9
Q7Z2Q7	LRRC70	LRRC70 UNQ1891/PRO4337	0.816263	No	membrane&secreted	NULL	NULL	NULL	IPR000483;IPR003591	NULL	PDGFB	LRRC70
P09038	FGF2	FGF2 FGFB	0.815919	Yes	intracellular	NULL	extracellular region|extracellular space|extracellular matrix organization	GO:0005576|GO:0005615|GO:0030198	--	--	--	FGF2
Q9UBX1	CTSF	CTSF	0.815677	Yes	secreted	NULL	extracellular vesicle|extracellular space|extracellular exosome	GO:1903561|GO:0005615|GO:0070062	--	--	--	CTSF
P19823	ITIH2	ITIH2 IGHEP2	0.815576	Yes	secreted	isExome	extracellular exosome|collagen-containing extracellular matrix|extracellular region	GO:0070062|GO:0062023|GO:0005576	--	--	--	ITIH2
Q2TV78	MST1L	MST1L D1F15S1A MST1P9 MSTP9	0.815293	Yes	NULL	NULL	extracellular region	GO:0005576	--	--	--	MST1L
Q9HCM2	PLXNA4	PLXNA4 KIAA1550 PLXNA4A PLXNA4B UNQ2820/PRO34003	0.815131	Yes	membrane&secreted	isExome	NULL	NULL	--	--	--	PLXNA4
P48357	LEPR	LEPR DB OBR	0.814869	No	membrane	isExome	extracellular region	GO:0005576	IPR003961	LEP	ADIPOQ;BGLAP;LEP;INS;IL6;CNTF;PRL;IGF1;IL10;EGF;OSM;CSF3;GH1;IL11;IL4;LIF;IL2;IFNG;IL3;EPO;IL12A;CSF2;IL5;IL13;IL15;IL7;CTF1;THPO;PDGFB;CSH1;CSH2;FGF21;IFNA21;IFNA16;IFNB1;IFNA10;IFNA13;IFNA8;IFNA17;IFNA4;IFNA1;IFNA14;IFNA6;IFNA7;IL9;IFNA5;IFNA2;IL24;PDGFA;IFNE;IL20;IFNW1;IL17D;IL19;IL12B;IL23A;IFNK;IL22;TNF;INS-IGF2;BDNF;VEGFA;CCL2;CXCL12;SERPINE1	LEPR
O95407	TNFRSF6B	TNFRSF6B DCR3 TR6 UNQ186/PRO212	0.814727	No	secreted	NULL	extracellular space|extracellular region	GO:0005615|GO:0005576	NULL	TNFSF14;TNFSF14;TNFSF14;TNFSF14;TNFSF14;TNFSF14;TNFSF15;TNFSF15;TNFSF15;FASLG	HSPG2;VWA5B2;SPON2;TNFSF15;FASLG;TNFSF14;TNF;MMP2;GPC1	TNFRSF6B
P05362	ICAM1	ICAM1	0.814465	No	membrane&secreted	isExome	collagen-containing extracellular matrix|extracellular exosome|extracellular space|extracellular matrix organization	GO:0062023|GO:0070062|GO:0005615|GO:0030198	NULL	FGG	FN1;ADIPOQ;VWF;SPP1;FGG;BGN;WISP1;CTGF;NOV;BMPER;THBS1;ELN;WISP3;VTN;IL10;TNF;IL6;CCL2;CXCL8;IL1B;MST1;VEGFA;IFNG;IL4;CCL5;IL2;IL18;IL1A;AREG;IL17A;INS;CXCL12;IL5;LEP;CXCL1;IL15;CX3CL1;MMP2;MUC1;FGF2;MMP9;CSF2;EGF;CXCL10;ELANE;CXCL11;MMP3;SERPINE1;IGF1;CCL3;IFNA1;CXCL2;S100B;IL13;CCL20;PLG;TIMP1;CSF3;OSM;CXCL9;CCL4;BDNF;CCL21;MMP1;CCL11;CSF1;TNFSF12;CCL19;IL7;FASLG;CCL15;ANXA5;CXCL13;TGFB1;BMP4;C…	ICAM1
Q9BXJ4	C1QTNF3	C1QTNF3 CTRP3 UNQ753/PRO1484	0.814444	Yes	secreted	isExome	extracellular exosome	GO:0070062	--	--	--	C1QTNF3
A6NF34	ANTXRL	ANTXRL	0.813778	No	membrane	NULL	NULL	NULL	IPR002035	NULL	COL13A1;COLEC12	ANTXRL
Q8IUB2	WFDC3	WFDC3 WAP14	0.813374	No	secreted	NULL	extracellular region	GO:0005576	NULL	NULL	NULL	WFDC3
P20701	ITGAL	ITGAL CD11A	0.813212	No	membrane&secreted	isExome	extracellular exosome|extracellular matrix organization	GO:0070062|GO:0030198	IPR002035	NULL	EMILIN1;FN1;ESM1;ADAM8;CLEC12A;ADAM10;CLEC4D;CLEC5A;MMP25;PLAU;TNF;IL2;IL7;IL6;CCL5;IL10;IL4;CXCL8;CSF2;IFNG;IL17A;IL15;CCL3;IL1B;CCL2;TNFSF13B;FASLG;C1QB;CCL27;C1QA;CSF3	ITGAL
O60568	PLOD3	PLOD3	0.813192	Yes	secreted	isExome	collagen-containing extracellular matrix|extracellular exosome|extracellular space	GO:0062023|GO:0070062|GO:0005615	--	--	--	PLOD3
Q99988	GDF15	GDF15 MIC1 PDF PLAB PTGFB	0.813172	Yes	secreted	isExome	collagen-containing extracellular matrix|extracellular region|extracellular exosome|extracellular space	GO:0062023|GO:0005576|GO:0070062|GO:0005615	--	--	--	GDF15
O14511	NRG2	NRG2 NTAK	0.812768	Yes	membrane	isExome	extracellular region|extracellular space	GO:0005576|GO:0005615	--	--	--	NRG2
P28827	PTPRM	PTPRM PTPRL1	0.812646	No	membrane	NULL	NULL	NULL	IPR003961	NULL	FN1;KITLG	PTPRM
Q9Y5K2	KLK4	KLK4 EMSP1 PRSS17 PSTS	0.812	No	secreted	NULL	extracellular matrix disassembly|extracellular region	GO:0022617|GO:0005576	NULL	NULL	AMBN;AMELX;LAMB3;SPON1;FN1;VTN;DSPP;KNG1;SERPING1;MMP20;A2M;SERPINC1;MMP25;EGF;SERPINA1;SERPINF2;AGT;SERPINA4;NGF;IL4;FAM20A;SERPINA5;INS;SERPIND1;SERPINE1;CTSD;FLG;MEP1A;HRG;VEGFA;CTSB	KLK4
Q96MS0	ROBO3	ROBO3	0.811939	No	membrane	NULL	NULL	NULL	IPR003961	NELL2;NELL2;NELL2	SLIT3;SLIT1;SLIT2;NTN1;NELL2;NYX;CBLN1;CBLN3;SEMA5B;SEMA5A;SEMA6C;SEMA6A;SEMA6D;CBLN2;SEMA3A;SEMA3B;SEMA6B;SEMA7A;SEMA3E;SEMA3D;SEMA4C;SEMA3F;SEMA4G;SEMA3C;SEMA4F;SEMA4B;SEMA3G;SEMA4A;SEMA4D	ROBO3
Q02763	TEK	TEK TIE2 VMCM VMCM1	0.811859	No	membrane&secreted	NULL	extracellular region	GO:0005576	IPR003961	ANGPT2;ANGPT2;ANGPT2;ANGPT2;ANGPT2;ANGPT2;ANGPT2;ANGPT2;ANGPT2;ANGPT4;ANGPT1	FN1;VWF;COL18A1;THBS1;COMP;SPP1;ANGPT1;ANGPT2;ANGPT4;VEGFA;MMP2;PLG;FGF2;VEGFC;CSF1;PDGFB;PGF;FGF1;VEGFB;EGF;FIGF;HGF;KITLG;FGF4;FGF7;INS;FGF6;FGF22;FGF10;FGF3;IGF1;ANGPTL1;FGF8;PDGFA;FGF21;FGF19;FGF9;FGF16;FGF5;FGF18;FGF20;FGF17;PDGFC;FGF23;IGF2;NGF;BDNF;ANGPTL2;PDGFD;FLT3LG;CXCL12;NTF3;TGFA;ANGPTL3;THPO;EREG;NTF4;AREG;FGF13;PI3;WNT5A;MMP9;EMCN;CXCL8;IL6;LOX;CCL2;EPO;TNF;IL11;BMP4;CSF3;FGF11;ANG…	TEK
P34741	SDC2	SDC2 HSPG1	0.811758	Yes	membrane	isExome	collagen-containing extracellular matrix	GO:0062023	--	--	--	SDC2
Q9NQ79	CRTAC1	CRTAC1 ASPIC1 CEP68	0.811495	No	secreted	NULL	extracellular exosome	GO:0070062	IPR001881	NULL	EGF;CTSV;SERPINA11	CRTAC1
Q9Y279	VSIG4	VSIG4 CRIg Z39IG UNQ317/PRO362	0.81099	No	membrane	NULL	NULL	NULL	NULL	NULL	SRGN;FGL2;COL8A1;SRPX2;C1QB;C1QA;C1QC;F13A1;A2M;IL4;IL6;BMP1;TGFB1;CLEC5A;CLEC10A;SERPING1;MASP1	VSIG4
Q6ZN44	UNC5A	UNC5A KIAA1976 UNC5H1	0.810667	No	membrane	NULL	NULL	NULL	IPR000884	NULL	NTN1;NTN4;NTN3;NTNG2;NTNG1;NTN5;SLIT1;SLIT3;LGI3;SLIT2;SEMA3A;SEMA6A;SEMA6C;SEMA3F;PLXNA4	UNC5A
Q8IXL6	FAM20C	FAM20C DMP4	0.80996	Yes	secreted	isExome	extracellular space|extracellular exosome	GO:0005615|GO:0070062	--	--	--	FAM20C
P08476	INHBA	INHBA	0.809677	Yes	secreted	isExome	extracellular region|extracellular space	GO:0005576|GO:0005615	--	--	--	INHBA
Q6ZMR5	TMPRSS11A	TMPRSS11A ECRG1 HATL1 HESP	0.809192	No	membrane	NULL	extracellular region	GO:0005576	IPR000082	NULL	NULL	TMPRSS11A
P01876	IGHA1	IGHA1	0.809091	No	NULL	isExome	extracellular region|extracellular exosome|extracellular space	GO:0005576|GO:0070062|GO:0005615	NULL	FN1;FGA;PRSS3;SERPIND1;TGM4;CTSL;GDF10;PLG	NULL	IGHA1
O75019	LILRA1	LILRA1 LIR6	0.809071	No	membrane	NULL	NULL	NULL	NULL	NULL	S100A12;CLEC12A;S100A8;S100A9;CLEC4A;CLEC4D;CLEC1B;CLEC5A	LILRA1
P10323	ACR	ACR ACRS	0.808909	No	secreted	NULL	extracellular region	GO:0005576	NULL	NULL	ZP2;ZP3;ZP4;SERPINA5;ADAM2;SPAM1	ACR
Q14162	SCARF1	SCARF1 KIAA0149 SREC	0.808889	No	secreted	NULL	NULL	NULL	IPR002049	NULL	MFGE8;GAS6;CLEC7A;SERPINF1;IFNG	SCARF1
Q9UIV8	SERPINB13	SERPINB13 PI13	0.808808	Yes	membrane	isExome	extracellular space|extracellular exosome	GO:0005615|GO:0070062	--	--	--	SERPINB13
O75487	GPC4	GPC4 UNQ474/PRO937	0.808384	Yes	membrane	isExome	collagen-containing extracellular matrix|extracellular exosome	GO:0062023|GO:0070062	--	--	--	GPC4
Q92563	SPOCK2	SPOCK2 KIAA0275 TICN2 UNQ269/PRO306	0.808182	Yes	secreted	NULL	extracellular matrix binding|extracellular space|extracellular matrix organization|extracellular matrix	GO:0050840|GO:0005615|GO:0030198|GO:0031012	--	--	--	SPOCK2
P29460	IL12B	IL12B NKSF2	0.808162	Yes	secreted	NULL	extracellular region|extracellular space	GO:0005576|GO:0005615	--	--	--	IL12B
Q2M2W7	C17orf58	C17orf58	0.808081	Yes	secreted	NULL	NULL	NULL	--	--	--	C17orf58
Q9NRS4	TMPRSS4	TMPRSS4 TMPRSS3 UNQ776/PRO1570	0.807859	No	membrane	isExome	NULL	NULL	NULL	CLEC7A;CLEC7A;CLEC7A	PCSK5;ADAM32	TMPRSS4
Q5T700	LDLRAD1	LDLRAD1	0.807657	No	membrane	NULL	NULL	NULL	NULL	NULL	FGFBP3;INS-IGF2	LDLRAD1
Q9NP70	AMBN	AMBN	0.807212	Yes	secreted	NULL	extracellular region	GO:0005576	--	--	--	AMBN
Q9UKQ9	KLK9	KLK9	0.807131	No	secreted	NULL	extracellular region	GO:0005576	NULL	TGFB1	KNG1;EGF;NTF4;FLG;MMP28;NGF	KLK9
Q14563	SEMA3A	SEMA3A SEMAD	0.80703	Yes	secreted	NULL	extracellular region|extracellular space	GO:0005576|GO:0005615	--	--	--	SEMA3A
P20702	ITGAX	ITGAX CD11C	0.80701	No	membrane&secreted	isExome	extracellular matrix organization	GO:0030198	IPR002035	NULL	TNC;FGG;FGA;FGB;EMILIN1;FN1;ADIPOQ;LAMC2;CLEC4C;IL13;CLEC12A;CLEC4D;CLEC5A;SERPINB6;ADAM8;ADAM10;PLAU;IL4;IL17A;CSF2;FLT3LG;IL10;CCL2;TNF;IL6;IL2;CD209;CCL5;CSF1;CLEC7A;IL5;ANXA5;CXCL10;CCL19;CLEC9A;IFNG;CCL3;CCL21;HBEGF;TNFSF4;IL1B;CLEC10A;CCL4;SDC1;IL15;SERPINB2;IL18;IL23A;IL7;CXCL9;SERPINB7;SERPINB8;TNFSF13B;INS;IL3;CXCL8;SERPINB5;CXCL1;CCL22;CSF3;CCL17;CCL20;IFNA1;CXCL13;CLEC4A;CLEC6A;CXCL2;L…	ITGAX
Q9BY79	MFRP	MFRP	0.806909	No	membrane	NULL	NULL	NULL	IPR000859	NULL	NULL	MFRP
Q92729	PTPRU	PTPRU FMI PCP2 PTPRO	0.806848	No	membrane	NULL	NULL	NULL	IPR003961	NULL	FN1;MEP1B;CSF1	PTPRU
Q9H3U7	SMOC2	SMOC2 SMAP2 MSTP117	0.806727	Yes	membrane&secreted	NULL	extracellular space|extracellular matrix organization	GO:0005615|GO:0030198	--	--	--	SMOC2
P08133	ANXA6	ANXA6 ANX6	0.806485	Yes	intracellular	isExome	collagen-containing extracellular matrix|extracellular exosome	GO:0062023|GO:0070062	--	--	--	ANXA6
Q92956	TNFRSF14	TNFRSF14 HVEA HVEM UNQ329/PRO509	0.806242	No	membrane&secreted	NULL	NULL	NULL	NULL	TNFSF14;TNFSF14;TNFSF14;TNFSF14;TNFSF14;A2M;LTA;SERPINA4	TNFSF14;LTA;TNF;LGALS9;TNFSF8;TNFSF9;TNFSF4;TNFSF15;TNFSF18;TNFSF13;IL2;CCL21;TNFSF10;IL10;LTB;FASLG	TNFRSF14
P19875	CXCL2	CXCL2 GRO2 GROB MIP2A SCYB2	0.806202	Yes	secreted	isExome	extracellular region|extracellular space	GO:0005576|GO:0005615	--	--	--	CXCL2
P23468	PTPRD	PTPRD	0.806141	No	membrane&secreted	NULL	extracellular exosome	GO:0070062	IPR003961	NULL	F2;GPC6;PLXNA2;SFTPA2	PTPRD
Q6HA08	ASTL	ASTL	0.806081	Yes	secreted	NULL	NULL	NULL	--	--	--	ASTL
Q96PF1	TGM7	TGM7	0.80604	Yes	intracellular	NULL	NULL	NULL	--	--	--	TGM7
B2RNN3	C1QTNF9B	C1QTNF9B	0.80602	Yes	secreted	NULL	extracellular region	GO:0005576	--	--	--	C1QTNF9B
O75022	LILRB3	LILRB3 ILT5 LIR3	0.805939	No	membrane&secreted	NULL	NULL	NULL	NULL	NULL	CLEC4A	LILRB3
P17538	CTRB1	CTRB1 CTRB	0.805616	No	secreted	NULL	extracellular space|extracellular matrix disassembly|extracellular region	GO:0005615|GO:0022617|GO:0005576	NULL	NULL	MMP9;MMP3;MMP10;CELA3A;CELA3B;PRSS1;PRSS3;SERPINF2;CELA2B;SERPINA1;CELA2A;SERPINE2;REG1B	CTRB1
P56199	ITGA1	ITGA1	0.805232	No	membrane	isExome	extracellular exosome|extracellular matrix organization	GO:0070062|GO:0030198	IPR002035	NULL	LAMA1;COL4A1;LAMC1;LAMA4;COL13A1;LAMA2;LAMA5;LAMA3;LAMB1;COL1A1;COL4A2;COL1A2;LAMC2;LAMB3;COL6A1;COL5A1;LAMC3;COL4A4;COL6A2;COL2A1;COL6A3;COL5A2;COL16A1;COL4A3;COL4A5;AGRN;LAMB2;COL6A6;COL6A5;COL9A3;COL9A1;COL4A6;COL9A2;VTN;THBS4;THBS1;THBS2;THBS3;TNC;SPP1;TNN;TNR;IBSP;COMP;VWF;RELN;TNXB;LAMB4;CHAD;COL3A1;EMILIN1;FN1;COL8A1;SPOCK1;MATN1;SEMA7A;VEGFA;EGF;FIGF;WNT5A;CCL27;TIMP2	ITGA1
O60565	GREM1	GREM1 CKTSF1B1 DAND2 DRM PIG2	0.805232	Yes	secreted	isExome	collagen-containing extracellular matrix|extracellular space	GO:0062023|GO:0005615	--	--	--	GREM1
P26010	ITGB7	ITGB7	0.805111	No	membrane&secreted	isExome	extracellular exosome|extracellular matrix organization	GO:0070062|GO:0030198	NULL	NULL	FN1;LAMC1;LAMA1;LAMA2;COL1A1;RELN;THBS1;LAMA5;LAMA4;LAMA3;VTN;VWF;LAMC2;LAMC3;LAMB2;LAMB1;COL4A1;COL1A2;COL6A2;THBS4;COL4A4;COL4A6;COL4A2;COL4A5;COL2A1;COL9A3;IBSP;TNN;THBS3;COL6A1;COL6A3;COL4A3;LAMB4;LAMB3;THBS2;TNR;CHAD;TNC;COL9A2;SPP1;COL6A6;COMP;COL6A5;COL9A1;TNXB;EMILIN1;IGFBP6;AMBP;CCL25;CLEC2D;ITIH3;ITIH2;HBEGF	ITGB7
P55082	MFAP3	MFAP3	0.805111	Yes	membrane&secreted	NULL	extracellular region	GO:0005576	--	--	--	MFAP3
Q58EX2	SDK2	SDK2 KIAA1514	0.804747	No	membrane	isExome	NULL	NULL	IPR003961	NULL	NTN5;NTN1;NTNG1;SEMA5A	SDK2
P51689	ARSD	ARSD	0.804444	No	membrane	NULL	NULL	NULL	NULL	NULL	NULL	ARSD
Q14517	FAT1	FAT1 CDHF7 FAT	0.804061	No	membrane&secreted	isExome	extracellular exosome	GO:0070062	IPR001881;IPR001791	NULL	LAMC1;COL12A1;TNF	FAT1
P01040	CSTA	CSTA STF1 STFA	0.804061	Yes	intracellular	isExome	extracellular space	GO:0005615	--	--	--	CSTA
Q08174	PCDH1	PCDH1	0.80402	No	membrane&secreted	isExome	NULL	NULL	NULL	NULL	MUC15;MUC20;ADAM33	PCDH1
P18627	LAG3	LAG3 FDC	0.803838	No	membrane&secreted	NULL	NULL	NULL	NULL	NULL	FGL2;IL2;IL10;LGALS9;TNF;IL7;IFNG;IL17A;IL4;IL15;CLEC4G;CSF2;CCL4;IL6;FASLG;TNFSF4;CXCL10;CCL5;TNFSF9;CXCL9;IL13	LAG3
Q9UPX0	IGSF9B	IGSF9B KIAA1030	0.803636	No	membrane	NULL	NULL	NULL	IPR003961	NULL	ELFN1	IGSF9B
Q8TD84	DSCAML1	DSCAML1 DSCAM2 KIAA1132	0.803495	No	membrane	NULL	extracellular space	GO:0005615	IPR003961	NULL	NTN1;NTN5;COL1A1;SEMA4G;LPA;MEGF11;PLXNA4;MEGF10	DSCAML1
P0DOX6			0.803495	No	NULL	NULL	NULL	NULL	--	--	--
P13671	C6	C6	0.803253	No	secreted	isExome	extracellular exosome|extracellular region	GO:0070062|GO:0005576	IPR000436;IPR000884	NULL	VTN;FGG;FGA;FGB;MASP1;HABP2;F13B;MBL2;F9;SERPINC1;F12;F7;SERPINA10;ITIH3;HRG;ANGPTL3;HGFAC;F2;PAMR1;C1QC;ITIH2;MASP2	C6
Q96QU1	PCDH15	PCDH15 USH1F	0.803212	No	membrane&secreted	NULL	extracellular region	GO:0005576	NULL	NULL	EYS;COCH;WNT8A;PLAU	PCDH15
O75094	SLIT3	SLIT3 KIAA0814 MEGF5 SLIL2 UNQ691/PRO1336	0.803192	Yes	secreted	NULL	extracellular space	GO:0005615	--	--	--	SLIT3
Q9Y5Z7	HCFC2	HCFC2	0.803051	Yes	intracellular	NULL	NULL	NULL	--	--	--	HCFC2
Q8IYS5	OSCAR	OSCAR	0.80297	No	membrane&secreted	NULL	extracellular exosome|extracellular region	GO:0070062|GO:0005576	NULL	NULL	TNFAIP6;LRG1;PRG3;MMP9;PPBP;CTSS;CTSZ;ELANE;CXCL1;CTSH;MMP8;CST3;CTSD;PRSS3;TIMP2;HPSE;SLPI;FLG2;CSTB;CTSK;TNFSF11;CSF1;PAPPA;CLEC5A	OSCAR
Q07507	DPT	DPT	0.802929	Yes	secreted	NULL	extracellular space|collagen-containing extracellular matrix|extracellular matrix structural constituent	GO:0005615|GO:0062023|GO:0005201	--	--	--	DPT
P49257	LMAN1	LMAN1 ERGIC53 F5F8D	0.802848	Yes	membrane	isExome	collagen-containing extracellular matrix|extracellular exosome	GO:0062023|GO:0070062	--	--	--	LMAN1
P21246	PTN	PTN HBNF1 NEGF1	0.802667	Yes	secreted	NULL	extracellular region|extracellular space	GO:0005576|GO:0005615	--	--	--	PTN
Q16827	PTPRO	PTPRO GLEPP1 PTPU2	0.802646	No	membrane&secreted	isExome	extracellular exosome	GO:0070062	IPR003961	PLXNB2	FN1;COL4A4;COL4A3;NTF3;KITLG;CSF1	PTPRO
P40967	PMEL	PMEL D12S53E PMEL17 SILV	0.802545	No	membrane&secreted	isExome	extracellular region	GO:0005576	NULL	NULL	IGFBP1;IL2;CSF2;AMBP;IL15;IL7;IL4;IFNG;IL10;TNF;CSPG4;MUC1;CRNN;LIF;VEGFA	PMEL
Q06033	ITIH3	ITIH3	0.802505	Yes	secreted	isExome	extracellular exosome|extracellular region	GO:0070062|GO:0005576	--	--	--	ITIH3
Q99944	EGFL8	EGFL8 C6orf8 NG3 UNQ8752/PRO29920	0.801798	Yes	secreted	NULL	extracellular region	GO:0005576	--	--	--	EGFL8
O75051	PLXNA2	PLXNA2 KIAA0463 OCT PLXN2 UNQ209/PRO235	0.801778	Yes	membrane	isExome	NULL	NULL	--	--	--	PLXNA2
Q8N474	SFRP1	SFRP1 FRP FRP1 SARP2	0.801515	Yes	secreted	isExome	collagen-containing extracellular matrix|extracellular region|extracellular exosome|extracellular space	GO:0062023|GO:0005576|GO:0070062|GO:0005615	--	--	--	SFRP1
P20138	CD33	CD33 SIGLEC3	0.801333	No	membrane	isExome	NULL	NULL	NULL	C1QC;C1QB;C1QA;LEP	SPON1;CLEC12A;CLEC4C;CLEC5A;ADAM10;CLEC4D;ADAM8;PLAU;SERPINB6;MMP25;IL6;CSF3;CSF2;IL3;KITLG;AMBP;LEP;IL10;IL2;COLEC10;TNF;FLT3LG;IL4;SDC1;THPO;CD209;PCSK5;VEGFA;CSF1;ANXA5;EPO;C1QA;IL7;IL15	CD33
Q9NYQ8	FAT2	FAT2 CDHF8 KIAA0811 MEGF1	0.801293	No	membrane	isExome	extracellular exosome	GO:0070062	IPR001881;IPR001791	NULL	LAMC1;SPARC;COL27A1;CBLN3;EGF	FAT2
Q9Y625	GPC6	GPC6 UNQ369/PRO705	0.801232	Yes	secreted	isExome	collagen-containing extracellular matrix|extracellular space	GO:0062023|GO:0005615	--	--	--	GPC6
Q8NI99	ANGPTL6	ANGPTL6 AGF ARP5 UNQ152/PRO178	0.801192	Yes	secreted	NULL	extracellular exosome	GO:0070062	--	--	--	ANGPTL6
Q8IWL1	SFTPA2	SFTPA2 COLEC5 PSAP SFTP1 SFTPA SFTPA2B	0.80101	Yes	secreted	NULL	extracellular region|extracellular space	GO:0005576|GO:0005615	--	--	--	SFTPA2
Q9BWV1	BOC	BOC UNQ604/PRO1190	0.800424	No	membrane&secreted	NULL	NULL	NULL	IPR003961	DHH;DHH;IHH;IHH	DCN;HAPLN2;BCAN;EPYC;DHH;IHH;SHH;HHIP;ELFN2	BOC
Q9Y337	KLK5	KLK5 SCTE UNQ570/PRO1132	0.800424	No	secreted	isExome	extracellular matrix disassembly|extracellular region|extracellular space	GO:0022617|GO:0005576|GO:0005615	NULL	TGFB1;FLG;FLG;FLG;FLG	FLG;ST14;CELA2A;KNG1;SERPINA1;EGF;CTSC;SLPI	KLK5
P0CG36	CFC1B	CFC1B	0.800404	Yes	secreted	NULL	extracellular region	GO:0005576	--	--	--	CFC1B
Q9BZJ3	TPSD1	TPSD1	0.800303	No	secreted	NULL	extracellular space	GO:0005615	NULL	NULL	NULL	TPSD1
Q8N2Q7	NLGN1	NLGN1 KIAA1070	0.800061	No	membrane	NULL	NULL	NULL	NULL	NULL	THBS1;SPARCL1;LAMA1;NTNG1;RELN;CBLN1;BDNF;SEMA5A;SEMA4C;FGF22	NLGN1
Q6UWL6	KIRREL2	KIRREL2 NEPH3 UNQ5827/PRO19646	0.799798	No	membrane&secreted	NULL	NULL	NULL	NULL	NULL	KAL1;SEMA3A;PLXNA1	KIRREL2
Q92859	NEO1	NEO1 IGDCC2 NGN	0.799616	No	membrane	isExome	NULL	NULL	IPR003961	NTN1;NTN4;BMP2	NTN1;NTN3;NTN4;SLIT3;SLIT1;SLIT2;NTN5;NTNG1;NTNG2;BMP2;BMP6;SHH;SEMA6D;SEMA6A;SEMA6C;SEMA5B;BMP4;SEMA5A;LGALS3;SEMA3F;SEMA3E;SEMA3A;BMP3;SEMA4G;SEMA3B;SEMA3D;SEMA6B;SEMA3G;SEMA4A;SEMA4C;SEMA3C;SEMA4B;SEMA4D;SEMA7A;WNT16	NEO1
Q9H1J5	WNT8A	WNT8A WNT8D	0.799212	Yes	secreted	NULL	collagen-containing extracellular matrix|extracellular region|extracellular space	GO:0062023|GO:0005576|GO:0005615	--	--	--	WNT8A
P08493	MGP	MGP MGLAP GIG36	0.798626	Yes	secreted	isExome	extracellular exosome|collagen-containing extracellular matrix|extracellular matrix|extracellular matrix structural constituent	GO:0070062|GO:0062023|GO:0031012|GO:0005201	--	--	--	MGP
P20151	KLK2	KLK2	0.798444	No	secreted	NULL	extracellular exosome|extracellular matrix disassembly|extracellular region	GO:0070062|GO:0022617|GO:0005576	NULL	NULL	IGFBP3;IGFALS;FBN3;IGFBP2;IGF2;MMP9;IGF1;MMP8;TGM4;SERPINA5;KNG1;EGF;NGF;SERPINE1;SERPINB6;A2M;SERPINF2;SERPINC1;SERPINA4;SERPINE2	KLK2
P20160	AZU1	AZU1	0.798404	No	secreted	isExome	extracellular region|extracellular exosome|extracellular space	GO:0005576|GO:0070062|GO:0005615	NULL	CLEC4G	THBS3;CYR61;COMP;ELANE;CTSG;S100A7;SERPINB3;CTSC;CTSA;ANXA2;HRNR;PTN;MDK;CCL2;SERPINA4;SERPINC1;FGF2;WNT8A;HRG;WNT8B;FGFBP1;WNT9B;PF4;WNT10A;WNT5B	AZU1
P51688	SGSH	SGSH HSS	0.798242	No	secreted	NULL	extracellular exosome	GO:0070062	NULL	NULL	MFGE8;KAL1;CTSD;GPC1;CTSA	SGSH
Q9Y6Z7	COLEC10	COLEC10 CLL1 UNQ366/PRO702	0.797778	Yes	secreted	isExome	extracellular region|extracellular space	GO:0005576|GO:0005615	--	--	--	COLEC10
O94813	SLIT2	SLIT2 SLIL3	0.797717	Yes	membrane&secreted	isExome	extracellular region|extracellular exosome|extracellular space	GO:0005576|GO:0070062|GO:0005615	--	--	--	SLIT2
O60449	LY75	LY75 CD205 CLEC13B	0.797212	No	membrane	isExome	extracellular exosome	GO:0070062	IPR001304;IPR000562	NULL	CLEC9A;CD209;CLEC4A;CLEC7A;CSF2;TNF;IL4;IL10;CLEC4C;FLT3LG;CLEC12A;IL2;IL15;IL6;CLEC2B;CLEC3A;IL17A;CLEC4D	LY75
Q9UKU9	ANGPTL2	ANGPTL2 ARP2 UNQ170/PRO196	0.796828	Yes	secreted	isExome	extracellular space|extracellular exosome|collagen-containing extracellular matrix	GO:0005615|GO:0070062|GO:0062023	--	--	--	ANGPTL2
Q9BQS7	HEPH	HEPH KIAA0698 UNQ2562/PRO6242	0.796485	No	membrane&secreted	isExome	NULL	NULL	NULL	NULL	FGG	HEPH
P19883	FST	FST	0.796444	Yes	secreted	isExome	extracellular region	GO:0005576	--	--	--	FST
Q7RTY5	PRSS48	PRSS48 ESSPL	0.796343	No	membrane&secreted	isExome	extracellular space	GO:0005615	NULL	NULL	CPAMD8	PRSS48
Q15517	CDSN	CDSN	0.796182	No	secreted	isExome	extracellular region	GO:0005576	NULL	NULL	TGM1;CSTA;RPTN;TCHH;PI3;FLG;FLG2;TGM4;ADAM33;SERPINB7;SERPINB12;TGM3;S100A7	CDSN
P35052	GPC1	GPC1	0.79602	Yes	membrane	isExome	collagen-containing extracellular matrix|extracellular region|extracellular exosome|extracellular matrix|extracellular space	GO:0062023|GO:0005576|GO:0070062|GO:0031012|GO:0005615	--	--	--	GPC1
P02671	FGA	FGA	0.795657	Yes	secreted	isExome	extracellular vesicle|collagen-containing extracellular matrix|extracellular matrix structural constituent|extracellular region|extracellular exosome|extracellular space|extracellular matrix organization	GO:1903561|GO:0062023|GO:0005201|GO:0005576|GO:0070062|GO:0005615|GO:0030198	--	--	--	FGA
Q86WI1	PKHD1L1	PKHD1L1	0.795556	No	membrane	isExome	extracellular space	GO:0005615	NULL	NULL	NULL	PKHD1L1
Q7Z304	MAMDC2	MAMDC2	0.795556	No	secreted	isExome	extracellular region	GO:0005576	NULL	NULL	ABI3BP;CHRDL1	MAMDC2
Q9Y6M0	PRSS21	PRSS21 ESP1 TEST1 UNQ266/PRO303	0.795515	No	secreted	NULL	extracellular space|extracellular region	GO:0005615|GO:0005576	NULL	SERPINB5;SERPINB5;SERPINB5;SERPINB5;SERPINB5;SERPINB5;SERPINB5	NTNG2;NTNG1;TECTA;TECTB;CD109;SERPINB5;SERPINA5	PRSS21
Q9UHN6	TMEM2	TMEM2 KIAA1412	0.795071	No	membrane	isExome	NULL	NULL	NULL	NULL	NYX;IGFALS;SEMA7A;HYAL2;ADAMTS4	TMEM2
Q9UEW3	MARCO	MARCO SCARA2	0.794707	No	membrane	NULL	NULL	NULL	IPR008160	NULL	C1QA;C1QB;C1QC;CTSS;COLEC12;CXCL13;LTA;CCL18;S100A9;S100A8;CLEC10A;CLEC5A	MARCO
P27918	CFP	CFP PFC	0.794687	No	secreted	NULL	collagen-containing extracellular matrix|extracellular region|extracellular space	GO:0062023|GO:0005576|GO:0005615	IPR000884	NULL	SPON2;THBS2;THBS1;SPON1;LRG1;PRG3;THSD4;TNFAIP6;SBSPON;THBS3;FGA;VTN;COMP;ADAMTS2;ADAMTSL1;CTSS;ELANE;MMP9;ADAMTS13;ADAMTS1;ADAMTS5;ADAMTSL2;SLPI;PPBP;ADAMTSL4;CTSH;CTSD;CXCL1;ADAMTSL3;SEMA5A;MMP8;CST3;SEMA5B;HPSE;FLG2;PRSS3;CTSZ;ADAMTS6;ADAMTSL5;ADAMTS10;TIMP2;ADAMTS12;ADAMTS16;ADAMTS7;ADAMTS19;ADAMTS3;ADAMTS17;ADAMTS18;ADAMTS8;ADAMTS4;ADAMTS9;CSTB;ADAMTS15;ADAMTS14;ADAMTS20;MBL2;MASP1;FCN2;MASP…	CFP
O60245	PCDH7	PCDH7 BHPCDH	0.794606	No	membrane	NULL	NULL	NULL	NULL	NULL	NID1;WIF1;ADAMTS16	PCDH7
Q9UBT3	DKK4	DKK4	0.794545	No	secreted	NULL	extracellular space|extracellular negative regulation of signal transduction	GO:0005615|GO:1900116	NULL	NULL	WNT3A;WNT1;WNT8A;WNT8B;WNT2B;WNT6;WIF1;WNT10B;SFRP1;FRZB;WNT10A;WNT2;SFRP5;SFRP2;SFRP4;EDA;WNT5A;WNT16;LTB	DKK4
Q8TDY8	IGDCC4	IGDCC4 DDM36 KIAA1628 NOPE	0.794485	No	membrane	NULL	NULL	NULL	IPR003961	NULL	P4HA3;HCFC2;CLEC19A;ADAMTSL5	IGDCC4
Q9HBG7	LY9	LY9 CDABP0070	0.794384	No	membrane	isExome	NULL	NULL	NULL	NULL	CTSS;C1QB;CST7;XCL2;C1QA;XCL1;C1QC	LY9
Q9UI38	PRSS50	PRSS50 CT20 TSP50	0.794323	No	secreted	NULL	NULL	NULL	NULL	TGFB1	ADAM2;MMP9;FGF2;FGF13	PRSS50
Q9UQ52	CNTN6	CNTN6	0.794303	No	membrane	NULL	NULL	NULL	IPR003961	NULL	NTNG1;NTNG2	CNTN6
Q02505	MUC3A	MUC3A MUC3	0.794182	Yes	membrane&secreted	NULL	extracellular matrix constituent, lubricant activity|extracellular region|extracellular matrix structural constituent	GO:0030197|GO:0005576|GO:0005201	--	--	--	MUC3A
Q9HCN6	GP6	GP6	0.793636	No	membrane&secreted	isExome	extracellular exosome	GO:0070062	NULL	NULL	VWF;COL1A1;COL3A1;COL1A2;COL6A3;COL2A1;COL4A3;COL4A6;COL6A2;COL6A1;COL4A1;COL9A3;COL6A6;COL4A2;COL4A4;COL4A5;COL9A1;COL6A5;COL9A2;FN1;VTN;CLEC1B;OVGP1;PF4;S100A10;SERPINC1	GP6
P56975	NRG3	NRG3	0.793495	Yes	membrane	NULL	extracellular region|extracellular space	GO:0005576|GO:0005615	--	--	--	NRG3
Q8TF66	LRRC15	LRRC15 LIB	0.793293	No	membrane	isExome	extracellular space|extracellular exosome|collagen-containing extracellular matrix|extracellular matrix	GO:0005615|GO:0070062|GO:0062023|GO:0031012	IPR000483;IPR003591	NULL	LUM;SERPINB9	LRRC15
Q0D2K5	EGFEM1P	EGFEM1P C3orf50 NCRNA00259	0.793212	No	NULL	NULL	NULL	NULL	NULL	NULL	NULL	EGFEM1P
P59901	LILRA4	LILRA4 ILT7	0.793172	No	membrane	NULL	NULL	NULL	NULL	NULL	CLEC4C;CLEC4A;CLEC9A;IL3	LILRA4
P40200	CD96	CD96	0.792768	No	membrane	NULL	NULL	NULL	NULL	NULL	SPON1;CLEC12A;COLEC10;SEMA4D	CD96
P01833	PIGR	PIGR	0.792545	No	membrane	isExome	extracellular space|extracellular exosome	GO:0005615|GO:0070062	NULL	NULL	DMBT1;IL17A;TNF;SLPI;CCL5;SFTPC;REG3G;IL4;REG3A	PIGR
P60827	C1QTNF8	C1QTNF8 UNQ5829/PRO19648	0.792485	Yes	secreted	NULL	extracellular region	GO:0005576	--	--	--	C1QTNF8
Q96D42	HAVCR1	HAVCR1 KIM1 TIM1 TIMD1	0.792343	No	membrane&secreted	NULL	NULL	NULL	NULL	NULL	IGFBP7;SPP1;NTN1;CST3;IL18;SEMA4A;CCL2;TIMP2;IL17A;IL6;MEP1B;TIMP1;S100A9;AGT	HAVCR1
Q5K4E3	PRSS36	PRSS36	0.79204	No	secreted	NULL	extracellular region	GO:0005576	NULL	NULL	NULL	PRSS36
Q9HBE5	IL21R	IL21R NILR UNQ3121/PRO10273	0.791596	No	membrane	NULL	NULL	NULL	IPR003961	NULL	IL15;IL2;IL4;IL7;IL22;IL9;IL10;IL6;IL13;IFNG;IL5;CSF2;IL3;IL19;IL23A;IL24;IL11;IL17D;OSM;IFNA1;CSF3;IFNB1;PDGFA;IFNA10;IFNA14;IFNA21;IFNE;IL12A;IFNA13;LIF;IFNA2;THPO;CNTF;LEP;IFNA16;IFNA17;IFNA8;IFNA4;IFNA5;IFNA6;IFNA7;CTF1;IFNK;EPO;EGF;CSH1;GH1;IL12B;IL20;IFNW1;CSH2;PDGFB;PRL;IL17A;CST7;IL17F;CXCL13;CCL24;XCL1;TNFSF13B;XCL2;TNF;CCL2	IL21R
P18564	ITGB6	ITGB6	0.791535	No	membrane	isExome	extracellular matrix organization	GO:0030198	NULL	NULL	FN1;VTN;FBN1;TNC;FBN3;FBN2;LAMA3;LAMB3;TNN;TNR;TNXB;LAMC2;LAMA5;LAMA4;LAMA2;LAMB1;LAMA1;COL1A1;LAMC1;COL6A3;COL4A4;COL4A1;IBSP;THBS1;SPP1;VWF;COL4A6;COL4A2;CHAD;COL6A1;COL1A2;LAMC3;COL2A1;LAMB2;COL9A3;LAMB4;COL6A6;COL4A5;COL9A1;THBS4;COL4A3;THBS2;THBS3;COL9A2;COL6A2;COMP;COL6A5;RELN;ELN;EMILIN1;NPNT;COL17A1;AMBN;TGFB1;TGFB3;MMP20;MMP12;MMP25;HBEGF;FAM20A	ITGB6
O75578	ITGA10	ITGA10 UNQ468/PRO827	0.791455	No	membrane	NULL	extracellular matrix organization	GO:0030198	IPR002035	NULL	COL2A1;COL9A1;COL9A2;COL16A1;COL9A3;COL4A2;LAMA5;LAMA1;LAMA2;COL4A4;CHAD;LAMC1;LAMA3;LAMA4;VTN;COL6A1;COL1A1;COL4A1;LAMB1;THBS4;LAMC2;COL6A2;TNN;TNR;TNC;COL4A5;LAMC3;COL6A3;COL4A6;THBS3;COL1A2;LAMB3;VWF;THBS2;COMP;THBS1;SPP1;COL6A6;RELN;LAMB4;LAMB2;COL4A3;IBSP;COL6A5;TNXB;EMILIN1;SNED1	ITGA10
P48304	REG1B	REG1B PSPS2 REGL	0.791354	Yes	secreted	NULL	extracellular space|extracellular exosome	GO:0005615|GO:0070062	--	--	--	REG1B
P10586	PTPRF	PTPRF LAR	0.791273	No	membrane&secreted	isExome	extracellular exosome	GO:0070062	IPR003961	NULL	NID1;FN1;PLXNA2;GPC4;GPC6;GPC2	PTPRF
Q13231	CHIT1	CHIT1	0.791212	No	secreted	NULL	extracellular region|extracellular space	GO:0005576|GO:0005615	NULL	NULL	LRG1;TNFAIP6;PRG3;MMP9;CTSD;CST3;SLPI;CTSH;CTSS;MMP8;ELANE;CTSZ;HPSE;PRSS3;CSTB;PPBP;TIMP2;CXCL1;FLG2;CCL18;IL4;PRL;MEGF9;IL13;F2	CHIT1
Q93098	WNT8B	WNT8B	0.791212	Yes	secreted	NULL	extracellular region|extracellular space	GO:0005576|GO:0005615	--	--	--	WNT8B
O60469	DSCAM	DSCAM	0.791192	No	membrane	NULL	extracellular region	GO:0005576	IPR003961	NULL	NTN1;NTN4;NTN5;SLIT1;SLIT3;NTNG1;SEMA5B;SEMA6A;SEMA5A;PLXNA4;SEMA3A;SEMA6D;SEMA4G;SEMA3E;SEMA6C;SEMA7A;LGALS4;SEMA3C;SEMA4B;SEMA4C;SEMA3G;SEMA6B;SEMA3B;SEMA3D;SEMA4A;SEMA3F;SEMA4D;SEMA4F	DSCAM
Q66K79	CPZ	CPZ	0.791172	No	secreted	NULL	extracellular space	GO:0005615	NULL	NULL	PLXNA2;SFTPD;CTSZ	CPZ
O94907	DKK1	DKK1 UNQ492/PRO1008	0.79097	No	secreted	isExome	extracellular region|extracellular negative regulation of signal transduction|extracellular space	GO:0005576|GO:1900116|GO:0005615	NULL	NULL	RSPO1;FN1;BGLAP;RSPO2;SPP1;WISP1;CTGF;RSPO3;MEPE;COL1A1;IBSP;WNT3A;WNT8A;WNT1;WNT8B;GPC3;WNT5A;WNT7A;SFRP1;WIF1;BMP4;TNFSF11;SFRP2;WNT3;SFRP5;WNT10B;WNT7B;FRZB;SFRP4;WNT2;VEGFA;WNT4;WNT2B;WNT10A;WNT5B;WNT9A;WNT11;WNT9B;WNT6;WNT16;TNF;BMP2;FGF2;SHH;CHRD;FGF8;LEFTY2;LEFTY1;IL17A;FGF10;FGF13;IGF1;FGF23;CTSK;IL6;S100B;FGF3;FGF4;IHH;IL13;EGF;GREM1;BMP7;FGF20;TDGF1;INS;FST;CXCL12;VEGFC;GDF2;SDC1;NODAL;…	DKK1
O60242	ADGRB3	ADGRB3 BAI3 KIAA0550	0.790889	No	membrane	NULL	NULL	NULL	IPR000859;IPR000884	NULL	NULL	ADGRB3
P03952	KLKB1	KLKB1 KLK3	0.790566	No	secreted	isExome	extracellular matrix disassembly|extracellular region|extracellular space|extracellular exosome	GO:0022617|GO:0005576|GO:0005615|GO:0070062	NULL	NULL	FGA;FGG;IGFBP3;FGB;KNG1;SERPING1;F12;A2M;MMP1;MMP3;PLG;SERPINC1;SERPINA5;TGM4;HRG;HGFAC;F9;SERPINA10;F7;HABP2;SERPINA1;ITIH3;SERPIND1;SERPINF2;EGF;F13B;ANGPTL3;MBL2;ITIH4;MST1	KLKB1
Q6MZW2	FSTL4	FSTL4 KIAA1061	0.790283	No	secreted	NULL	extracellular region	GO:0005576	NULL	NULL	SPOCK3;FSTL3;GDF15;FST;CHRDL2;BMP10;CHRDL1;CHRD	FSTL4
Q9P2J2	IGSF9	IGSF9 IGSF9A KIAA1355 NRT1	0.790222	No	membrane&secreted	NULL	NULL	NULL	IPR003961	NULL	ELFN1	IGSF9
Q9UIW2	PLXNA1	PLXNA1 NOV PLXN1	0.790121	Yes	membrane	isExome	extracellular exosome	GO:0070062	--	--	--	PLXNA1
P08842	STS	STS ARSC1	0.790081	No	membrane	NULL	NULL	NULL	NULL	NULL	SPOCK1;SMOC1;SMOC2;KAL1;IFNG;FLG	STS
Q86T26	TMPRSS11B	TMPRSS11B HATL5	0.789677	No	membrane	isExome	extracellular exosome	GO:0070062	IPR000082	NULL	NULL	TMPRSS11B
Q9UQ72	PSG11	PSG11 PSG13 PSG14	0.789576	No	secreted	NULL	extracellular region	GO:0005576	NULL	NULL	SDC2;TGFB1;GPC1;SDC1;SDC4;SDC3	PSG11
Q9P0G3	KLK14	KLK14 KLKL6	0.789576	No	secreted	NULL	extracellular space|extracellular region	GO:0005615|GO:0005576	NULL	NULL	SPON1;KNG1;TGM4;SERPINE2;AGT;EGF;FLG;TGM1;NGF	KLK14
Q8ND04	SMG8	SMG8 ABC2 C17orf71	0.789556	No	membrane	NULL	NULL	NULL	NULL	NULL	NULL	SMG8
Q9UJ99	CDH22	CDH22 C20orf25	0.789434	No	membrane	NULL	NULL	NULL	NULL	NULL	NTNG1;LGI3;NTNG2;BCAN;HAPLN2;HAPLN4;ADAM30;CST9L;CST9	CDH22
P43631	KIR2DS2	KIR2DS2 CD158J NKAT5	0.789253	No	NULL	NULL	NULL	NULL	NULL	NULL	NULL	KIR2DS2
Q6ZR98	PRSS43	PRSS43	0.78901	No	NULL	NULL	extracellular region	GO:0005576	NULL	NULL	NULL	PRSS43
Q8N743	KIR3DL3	KIR3DL3 CD158Z KIR3DL7 KIRC1	0.78897	No	membrane	NULL	NULL	NULL	NULL	NULL	LTA;CSF2;IL15;IL2	KIR3DL3
Q6UX71	PLXDC2	PLXDC2 TEM7R UNQ2514/PRO6003	0.788889	Yes	membrane	isExome	NULL	NULL	--	--	--	PLXDC2
Q9BXJ2	C1QTNF7	C1QTNF7 CTRP7	0.788343	Yes	secreted	NULL	extracellular region	GO:0005576	--	--	--	C1QTNF7
Q96PQ1	SIGLEC12	SIGLEC12 SIGLECL1 SLG UNQ9215/PRO34042	0.788182	No	membrane	NULL	NULL	NULL	NULL	NULL	NULL	SIGLEC12
P43630	KIR3DL2	KIR3DL2 CD158K NKAT4	0.788061	No	membrane	NULL	NULL	NULL	NULL	NULL	LTA;IL15;IL2;CSF2	KIR3DL2
Q7Z7G0	ABI3BP	ABI3BP NESHBP TARSH	0.788061	Yes	secreted	isExome	extracellular space|collagen-containing extracellular matrix|extracellular matrix organization|extracellular region|extracellular matrix structural constituent	GO:0005615|GO:0062023|GO:0030198|GO:0005576|GO:0005201	--	--	--	ABI3BP
P04080	CSTB	CSTB CST6 STFB	0.78798	Yes	intracellular	isExome	collagen-containing extracellular matrix|extracellular region|extracellular space|extracellular exosome	GO:0062023|GO:0005576|GO:0005615|GO:0070062	--	--	--	CSTB
Q6ZTQ4	CDHR3	CDHR3 CDH28	0.787636	No	membrane	NULL	NULL	NULL	NULL	NULL	NULL	CDHR3
Q6E0U4	DMKN	DMKN UNQ729/PRO1411	0.787152	No	secreted	NULL	extracellular space	GO:0005615	NULL	NULL	NULL	DMKN
Q8N6C8	LILRA3	LILRA3 ILT6 LIR4	0.787111	No	NULL	NULL	extracellular region	GO:0005576	NULL	NULL	NULL	LILRA3
P05556	ITGB1	ITGB1 FNRB MDF2 MSK12	0.786768	No	membrane&secreted	isExome	extracellular exosome|extracellular matrix organization	GO:0070062|GO:0030198	NULL	FN1;FN1;FN1;FN1;FN1;FN1;EMILIN1;CX3CL1;CX3CL1;ADAM17;ANGPTL4;ANGPTL4	FN1;SPP1;HSPG2;COL1A1;LAMA1;LAMC1;LAMA5;THBS1;COL6A3;NPNT;LAMA2;VTN;LAMB1;COL18A1;COL4A1;LAMA4;COL3A1;LAMA3;COL2A1;COL4A2;COL5A2;COL5A1;COL1A2;NID1;FBN1;COL4A5;RELN;LAMC2;COL11A1;COL7A1;LAMB3;COL4A4;COL6A2;DSPP;THBS2;LUM;LAMB2;COL6A1;COL4A6;TGFBI;COL13A1;LAMC3;COL11A2;AGRN;COL4A3;COMP;COL6A6;FBN2;TNC;COL9A3;COL9A1;COL16A1;FBN3;FGA;COL6A5;COL9A2;FGB;FGG;COL23A1;CHAD;TNXB;TNN;VWF;TNR;COL21A1;IBSP;E…	ITGB1
Q96BY9	SARAF	SARAF TMEM66 XTP3 HSPC035 NPD003 PSEC0019 UNQ1967/PRO4499	0.786727	No	membrane&secreted	NULL	NULL	NULL	NULL	NULL	NULL	SARAF
Q99467	CD180	CD180 LY64 RP105	0.786626	No	membrane	NULL	extracellular space|extracellular matrix	GO:0005615|GO:0031012	IPR000483;IPR003591	NULL	FGL2;IL1A;CTSS;S100A9	CD180
Q5VTL7	FNDC7	FNDC7	0.786626	Yes	secreted	NULL	extracellular region	GO:0005576	--	--	--	FNDC7
Q6GPI1	CTRB2	CTRB2	0.786283	No	secreted	NULL	extracellular space|extracellular matrix disassembly|extracellular region	GO:0005615|GO:0022617|GO:0005576	NULL	NULL	MMP10;CELA3A;PRSS1;CELA3B;PRSS3;CELA2B;CELA2A	CTRB2
P56202	CTSW	CTSW	0.786263	Yes	secreted	NULL	extracellular space|extracellular region	GO:0005615|GO:0005576	--	--	--	CTSW
Q96CG8	CTHRC1	CTHRC1 UNQ762/PRO1550	0.786202	Yes	secreted	NULL	collagen-containing extracellular matrix|extracellular region|extracellular matrix structural constituent|extracellular space	GO:0062023|GO:0005576|GO:0005201|GO:0005615	--	--	--	CTHRC1
Q6UXG3	CD300LG	CD300LG CLM9 TREM4 UNQ422/PRO846	0.786141	No	membrane&secreted	NULL	NULL	NULL	NULL	NULL	EMCN	CD300LG
Q9HCK4	ROBO2	ROBO2 KIAA1568	0.785697	No	membrane	isExome	extracellular exosome	GO:0070062	IPR003961	NULL	SLIT3;SLIT1;SLIT2;NTN1;NYX;SEMA5A;SEMA5B;SEMA6D;SEMA6A;SEMA3A;SEMA6C;SEMA3F;SEMA3B;SEMA3E;SEMA6B;SEMA3D;GDNF;SEMA4G;SEMA4C;SEMA3C;SEMA7A;SEMA4D;SEMA4F;SEMA4B;SEMA3G;SEMA4A;PLXNA4;PLXNA1;PLXNC1	ROBO2
Q8IWV2	CNTN4	CNTN4	0.785657	No	secreted	NULL	extracellular region	GO:0005576	IPR003961	NULL	NTNG2;NTNG1;TECTA;TECTB;CD109;SEMA5A	CNTN4
O75093	SLIT1	SLIT1 KIAA0813 MEGF4 SLIL1	0.785596	Yes	secreted	NULL	extracellular space	GO:0005615	--	--	--	SLIT1
Q86YC3	NRROS	NRROS LRRC33 UNQ3030/PRO9833	0.785495	No	membrane	NULL	sequestering of TGFbeta in extracellular matrix|extracellular region	GO:0035583|GO:0005576	IPR003591	NULL	NULL	NRROS
P55283	CDH4	CDH4	0.785414	No	membrane	NULL	NULL	NULL	NULL	NULL	LTBP3	CDH4
Q08345	DDR1	DDR1 CAK EDDR1 NEP NTRK4 PTK3A RTK6 TRKE	0.785313	No	membrane&secreted	isExome	extracellular exosome|regulation of extracellular matrix disassembly|regulation of extracellular matrix organization|extracellular space|extracellular matrix organization	GO:0070062|GO:0010715|GO:1903053|GO:0005615|GO:0030198	NULL	COL1A1;COL3A1;COL3A1;COL3A1;COL3A1;COL3A1;COL3A1;COL3A1;COL3A1;COL3A1;COL3A1;COL3A1;COL3A1;COL1A2	COL3A1;COL5A1;COL2A1;COL4A1;NOV;COL5A2;COL1A1;TGFBI;COL11A1;COL8A1;ADAM10;ADAMTS9	DDR1
P01042	KNG1	KNG1 BDK KNG	0.785192	Yes	secreted	isExome	collagen-containing extracellular matrix|extracellular region|extracellular exosome|extracellular space	GO:0062023|GO:0005576|GO:0070062|GO:0005615	--	--	--	KNG1
Q9UL52	TMPRSS11E	TMPRSS11E DESC1 TMPRSS11E2 UNQ742/PRO1461	0.785091	No	membrane	NULL	extracellular region	GO:0005576	IPR000082	NULL	SERPINA5;SERPINE1;MUC20;MUC15;ADAM32;ADAM30	TMPRSS11E
Q12860	CNTN1	CNTN1	0.784949	No	secreted	isExome	extracellular exosome	GO:0070062	IPR003961	NULL	TNR;GLDN;NCAN;HAPLN2;BCAN;TNC	CNTN1
Q6UW15	REG3G	REG3G PAP1B UNQ429/PRO162	0.784869	Yes	secreted	NULL	extracellular region|extracellular space	GO:0005576|GO:0005615	--	--	--	REG3G
Q6PEW0	PRSS54	PRSS54 KLKBL4	0.784808	No	secreted	NULL	extracellular space	GO:0005615	NULL	NULL	NULL	PRSS54
Q8IWU6	SULF1	SULF1 KIAA1077	0.784606	Yes	secreted	NULL	collagen-containing extracellular matrix|extracellular space	GO:0062023|GO:0005615	--	--	--	SULF1
Q15485	FCN2	FCN2 FCNL	0.784424	Yes	secreted	isExome	extracellular region|extracellular exosome	GO:0005576|GO:0070062	--	--	--	FCN2
Q6MZM0	HEPHL1	HEPHL1	0.784182	No	membrane	NULL	NULL	NULL	NULL	NULL	FGG;ANGPTL5	HEPHL1
O94856	NFASC	NFASC KIAA0756	0.78404	No	membrane&secreted	NULL	NULL	NULL	IPR003961	NULL	GLDN;BCAN;HAPLN2;TNR;NCAN;FN1;ADAM22	NFASC
Q99706	KIR2DL4	KIR2DL4 CD158D KIR103AS	0.783879	No	membrane&secreted	NULL	NULL	NULL	NULL	NULL	LTA;IL2;IL15;SDC4	KIR2DL4
Q02985	CFHR3	CFHR3 CFHL3 FHR3	0.783354	No	secreted	isExome	extracellular space|extracellular exosome	GO:0005615|GO:0070062	IPR000436	NULL	HMCN1;ADAMTS13;MASP2;TNFSF13	CFHR3
Q9NPF0	CD320	CD320 8D6A UNQ198/PRO224	0.782949	No	membrane	isExome	NULL	NULL	NULL	NULL	NULL	CD320
P57727	TMPRSS3	TMPRSS3 ECHOS1 TADG12 UNQ323/PRO382	0.782687	No	membrane	NULL	NULL	NULL	NULL	NULL	COCH;TSPEAR;SERPINB6	TMPRSS3
Q9BQR3	PRSS27	PRSS27 MPN UNQ1884/PRO4327	0.782525	No	secreted	NULL	extracellular region	GO:0005576	NULL	NULL	NULL	PRSS27
P54793	ARSF	ARSF	0.782465	No	membrane	isExome	extracellular exosome	GO:0070062	NULL	NULL	SULF2;GPC1	ARSF
Q5T2D2	TREML2	TREML2 C6orf76 TLT2 UNQ6268/PRO20473	0.782404	No	membrane	isExome	NULL	NULL	NULL	NULL	SERPINB12	TREML2
O43240	KLK10	KLK10 NES1 PRSSL1	0.781939	No	secreted	isExome	extracellular region	GO:0005576	NULL	NULL	KNG1;EGF;NTF4;NGF	KLK10
Q9UBX7	KLK11	KLK11 PRSS20 TLSP UNQ649/PRO1279	0.781798	No	secreted	isExome	extracellular space|extracellular exosome	GO:0005615|GO:0070062	NULL	NULL	KNG1;SERPINE2;MEP1A;EGF;TGM4;FLG;HTRA1;NGF;SERPINA1;A2M;SLPI	KLK11
Q9Y5W5	WIF1	WIF1 UNQ191/PRO217	0.781616	Yes	secreted	NULL	extracellular region	GO:0005576	--	--	--	WIF1
P78536	ADAM17	ADAM17 CSVP TACE	0.781434	Yes	membrane&secreted	isExome	NULL	NULL	--	--	--	ADAM17
P00450	CP	CP	0.781434	No	secreted	isExome	extracellular region|extracellular space|extracellular exosome	GO:0005576|GO:0005615|GO:0070062	NULL	NULL	FGG;FGA;FN1;SPP1;IGFBP1;IGFBP7;FBN1;IGFBP3;TNC;SPARCL1;GAS6;IGFBP5;VWA1;AMELX;LAMB2;IGFBP4;LTBP1;VCAN;MEPE;MATN3;LAMB1;MFGE8;DMP1;LAMC1;AMBN;CYR61;VTN;LRG1;FGB;SERPINA1;SERPINC1;IL6;KNG1;ITIH2;CST3;SERPIND1;TIMP1;BMP4;LGALS1;FGF23;CSF1;SERPINA10;ADAM10;GPC3;FAM20A;FAM20C;SDC2;CHRDL1;BMP15;FSTL3;FSTL1;A2M;PLG;HPX;ADAM8;F2;LPA;LOX;AMBP;SERPINA7;INS;SERPING1;IL4;SERPINA6;CTSB;AGT;ITIH4;HRG;SERPINA5;…	CP
O75635	SERPINB7	SERPINB7	0.781172	Yes	intracellular	NULL	extracellular space	GO:0005615	--	--	--	SERPINB7
Q9NRR2	TPSG1	TPSG1 PRSS31 TMT	0.780424	No	membrane	NULL	extracellular space	GO:0005615	NULL	NULL	NULL	TPSG1
P09486	SPARC	SPARC ON	0.780283	Yes	secreted	isExome	collagen-containing extracellular matrix|extracellular region|extracellular matrix structural constituent|extracellular matrix binding|extracellular space|extracellular matrix organization	GO:0062023|GO:0005576|GO:0005201|GO:0050840|GO:0005615|GO:0030198	--	--	--	SPARC
Q7Z692	CEACAM19	CEACAM19 CEAL1 UNQ2973/PRO7436	0.78002	No	membrane&secreted	NULL	NULL	NULL	NULL	NULL	DMBT1	CEACAM19
P32004	L1CAM	L1CAM CAML1 MIC5	0.779838	No	membrane&secreted	isExome	collagen-containing extracellular matrix	GO:0062023	IPR003961	NULL	NCAN;LAMB1;LAMC1;LAMA1;F9;IL1B;ADAM10	L1CAM
Q9P2B2	PTGFRN	PTGFRN CD9P1 EWIF FPRP KIAA1436	0.779616	No	membrane	isExome	NULL	NULL	NULL	NULL	PGF	PTGFRN
Q14953	KIR2DS5	KIR2DS5 CD158G NKAT9	0.779596	No	NULL	NULL	NULL	NULL	NULL	NULL	NULL	KIR2DS5
Q5DX21	IGSF11	IGSF11 BTIGSF CXADRL1 VSIG3	0.779253	No	membrane&secreted	NULL	NULL	NULL	NULL	NULL	SPON1	IGSF11
Q13361	MFAP5	MFAP5 MAGP2	0.779212	Yes	secreted	NULL	collagen-containing extracellular matrix|extracellular matrix organization|extracellular region|extracellular matrix structural constituent	GO:0062023|GO:0030198|GO:0005576|GO:0005201	--	--	--	MFAP5
Q9H158	PCDHAC1	PCDHAC1	0.779192	No	membrane	NULL	NULL	NULL	NULL	NULL	NULL	PCDHAC1
P19835	CEL	CEL BAL	0.779152	No	secreted	isExome	extracellular region|extracellular exosome|extracellular space	GO:0005576|GO:0070062|GO:0005615	NULL	NULL	CELA3B;CELA3A;CELA2A;CELA2B;INS;CELA1;WNT7B	CEL
P12643	BMP2	BMP2 BMP2A	0.779071	Yes	secreted	NULL	extracellular region|extracellular space	GO:0005576|GO:0005615	--	--	--	BMP2
Q7Z5P9	MUC19	MUC19	0.77901	Yes	NULL	NULL	extracellular region	GO:0005576	--	--	--	MUC19
P03951	F11	F11	0.77901	No	secreted	isExome	extracellular region|extracellular space|extracellular exosome	GO:0005576|GO:0005615|GO:0070062	NULL	NULL	FGG;FGA;VWF;FGB;FGL2;SERPINC1;KNG1;F2;F9;F12;SERPINA5;SERPIND1;F10;SERPINE2;SERPINF2;HRG;F7;F13B;SERPINA10;HABP2;SERPING1;MBL2;ITIH3;ANGPTL3;HGFAC;ITIH2;ADAMTS13;SERPINA4;SERPINA7;SERPINA1;ITIH1;AMBP;SERPINE1;A2M	F11
Q9NZU0	FLRT3	FLRT3 KIAA1469 UNQ856/PRO1865	0.778929	No	membrane	NULL	extracellular matrix|extracellular space	GO:0031012|GO:0005615	IPR000483;IPR003961;IPR003591;IPR000372	NULL	SLIT1;GLDN;LAMA1;NID1;FN1;KAL1;NTNG1;LAMA2;IGFBP7;FGF6;FGF10;FGF22;FGF4;FGF9;FGF2;FGF1;FGF3;FGF20;FGF23;FGF17;FGF8	FLRT3
Q6PI73	LILRA6	LILRA6 ILT8	0.778909	No	membrane	NULL	NULL	NULL	NULL	NULL	NULL	LILRA6
P15848	ARSB	ARSB	0.778848	No	secreted	isExome	extracellular region|extracellular exosome	GO:0005576|GO:0070062	NULL	NULL	CRISPLD2;VCAN;NCAN;HYAL4;CTSA;CTSC;HYAL1;SPAM1;HYAL2;ELANE;CTSG;HYAL3;SERPINB3;ANXA2;S100A7;HRNR;BMP4	ARSB
Q06141	REG3A	REG3A HIP PAP PAP1	0.778788	Yes	secreted	NULL	extracellular region|extracellular space	GO:0005576|GO:0005615	--	--	--	REG3A
P0DOX3			0.778707	No	NULL	NULL	NULL	NULL	--	--	--
Q9BYJ0	FGFBP2	FGFBP2 KSP37 UNQ425/PRO1065	0.778667	Yes	secreted	NULL	extracellular space	GO:0005615	--	--	--	FGFBP2
Q9H3G5	CPVL	CPVL VLP PSEC0124 UNQ197/PRO223	0.778222	No	secreted	isExome	extracellular exosome	GO:0070062	NULL	NULL	CTSD;CTSE	CPVL
Q02413	DSG1	DSG1 CDHF4	0.778141	No	membrane	isExome	NULL	NULL	NULL	GH1	COL17A1;FLG;TGM1;RPTN;CSTA;TCHH;PI3;CELA2A;IL13;SERPINB12;FLG2;SERPINB7;ST14;CTSC;SERPINA4;HRNR;SERPINA12;TGM3;CCL26;CRNN	DSG1
P43626	KIR2DL1	KIR2DL1 CD158A NKAT1	0.77804	No	membrane	NULL	NULL	NULL	NULL	NULL	IL15;IL2;IL18;IFNG;LTA	KIR2DL1
Q5KU26	COLEC12	COLEC12 CLP1 NSR2 SCARA4 SRCL	0.77804	Yes	membrane	isExome	extracellular space|extracellular matrix	GO:0005615|GO:0031012	--	--	--	COLEC12
Q92823	NRCAM	NRCAM KIAA0343	0.777899	No	membrane&secreted	NULL	extracellular region	GO:0005576	IPR003961	NULL	GLDN;BCAN;HAPLN2;NCAN;NTN1;LAMB1;SLIT1;PLXNA1;SEMA6D;SEMA6C;SEMA3A;PTN;SEMA3B;SEMA3F;BDNF;SEMA5B;SEMA3E;HGF	NRCAM
P30203	CD6	CD6	0.777879	No	membrane&secreted	isExome	extracellular region	GO:0005576	NULL	LGALS1;LGALS1;LGALS3;LGALS3	PAPPA;GPC5;IL2	CD6
O43155	FLRT2	FLRT2 KIAA0405 UNQ232/PRO265	0.777859	No	membrane	NULL	extracellular exosome|extracellular matrix	GO:0070062|GO:0031012	IPR000483;IPR003961;IPR003591;IPR000372	NULL	NID1;FN1;NTNG1;FGF9;FGF10;FGF2;FGF1;FGF23;FGF22;FGF20;FGF6;FGF3;FGF4	FLRT2
Q9BZA8	PCDH11Y	PCDH11Y PCDH11 PCDH22 PCDHY	0.777697	No	membrane	NULL	NULL	NULL	NULL	NULL	NULL	PCDH11Y
Q13018	PLA2R1	PLA2R1 CLEC13C	0.776949	No	membrane&secreted	NULL	extracellular region	GO:0005576	IPR001304;IPR000562	NULL	NULL	PLA2R1
P12830	CDH1	CDH1 CDHE UVO	0.776929	No	membrane&secreted	isExome	extracellular region|extracellular exosome|extracellular matrix organization	GO:0005576|GO:0070062|GO:0030198	NULL	TGM2;CCL5;SFRP2	LAMC2;LAMB1;LAMA1;FN1;CTGF;WISP3;POSTN;TGFBI;WISP1;SPP1;EFEMP1;VTN;ACAN;THBS1;SPARC;GAS6;IGFBP3;COL1A1;EGF;MMP9;HGF;IGF1;MMP7;MMP3;ADAM10;PLG;IGF2;ADAM15;MEP1B;GDNF;S100A4;VEGFA;FGF2;IL6;S100A8;CXCL8;MMP2;WNT5A;BMP4;ADAM9;MMP14;ANXA5;SERPINE1;BMP7;TGFB1;TIMP2;WNT7A;FLG;MUC5AC;LOXL2;MUC1;FGF13;IL10;INS;IL4;IL1B;MMP15;WNT3A;LEP;TNF;SHH;IL15;WNT1;TGFB3;MMP17;MMP25;MMP11;TIMP3;FGF5;BTC;MMP1;SDC4;MMP8…	CDH1
P43628	KIR2DL3	KIR2DL3 CD158B2 KIRCL23 NKAT2	0.776828	No	membrane	NULL	NULL	NULL	NULL	NULL	IL15;IL2;IL18;IFNG;TNF	KIR2DL3
Q92954	PRG4	PRG4 MSF SZP	0.776727	Yes	secreted	isExome	collagen-containing extracellular matrix|extracellular matrix structural constituent conferring compression resistance	GO:0062023|GO:0030021	--	--	--	PRG4
Q9NYZ4	SIGLEC8	SIGLEC8 SAF2	0.776323	No	membrane	NULL	NULL	NULL	NULL	NULL	IL5;IL13;CCL11	SIGLEC8
Q9BZA7	PCDH11X	PCDH11X KIAA1326 PCDH11 PCDHX	0.775818	No	membrane	NULL	NULL	NULL	NULL	NULL	SRPX2;FN1;SEMA4A;SEMA4B	PCDH11X
P12544	GZMA	GZMA CTLA3 HFSP	0.775818	No	secreted	isExome	extracellular region	GO:0005576	NULL	NULL	FGL2;CCL5;CST7;CTSC;FASLG;CXCL9;IL2;IFNG;IL10;TNF;CTSW;IL15;CCL4;CXCL10;IL4;IL17A;XCL1;IL6;IL7;TNFSF10	GZMA
P33763	S100A5	S100A5 S100D	0.775697	Yes	intracellular	NULL	NULL	NULL	--	--	--	S100A5
P43627	KIR2DL2	KIR2DL2 CD158B1 NKAT6	0.775616	No	NULL	NULL	NULL	NULL	NULL	NULL	NULL	KIR2DL2
P0DOX5			0.775576	No	NULL	NULL	NULL	NULL	--	--	--
P23515	OMG	OMG OMGP	0.775535	No	secreted	NULL	NULL	NULL	IPR003591;IPR000372	NULL	LUM;TNR;NCAN;HAPLN2;BCAN;GLDN;VCAN;SEMA4D;BDNF;SEMA5A;ELFN2;SEMA3A;SEMA5B;SEMA4C;SEMA6B;SEMA4G;SEMA3D;SEMA4B;SEMA3G;SEMA6A;SEMA6C;SEMA4A;SEMA6D;SEMA3C;SEMA3F;SEMA7A;SEMA3E;SEMA3B;PROL1;CNTF;NGF;GDF10;SEMA4F;CSPG4;NTF3	OMG
O75197	LRP5	LRP5 LR3 LRP7	0.775374	No	membrane	isExome	NULL	NULL	NULL	NULL	BGLAP;RSPO1;RSPO2;RSPO3;COL1A1;THBS1;WISP1;SPP1;AGRN;RSPO4;IBSP;HSPG2;MEPE;LAMC1;FN1;WNT1;WNT3A;WNT5A;WNT9A;WNT7B;WNT4;WIF1;WNT8A;SFRP1;WNT8B;SFRP2;WNT3;WNT2;WNT9B;WNT10B;WNT2B;WNT5B;WNT6;WNT7A;WNT11;SERPINF1;WNT10A;WNT16;BMP2;FRZB;PCSK5;SFRP4;SFRP5;TNFSF11;FGF22;TGM2;SEMA3C;BMP4;IGF1;MMP7;INS;SHH;IHH;CTSK;A2M;VEGFA;PLOD2	LRP5
Q8NHK3	KIR2DL5B	KIR2DL5B CD158F CD158F2 KIR2DL5 KIR2DLX	0.775212	No	NULL	NULL	NULL	NULL	NULL	NULL	NULL	KIR2DL5B
Q9HC56	PCDH9	PCDH9	0.77497	No	membrane	NULL	NULL	NULL	NULL	NULL	NULL	PCDH9
Q5VXM1	CDCP2	CDCP2	0.774586	Yes	membrane&secreted	NULL	extracellular region	GO:0005576	--	--	--	CDCP2
P16562	CRISP2	CRISP2 GAPDL5 TPX1	0.774424	No	secreted	NULL	extracellular space	GO:0005615	NULL	NULL	DSPP;ADAM2;CLC;ADAM32	CRISP2
Q8NC67	NETO2	NETO2 BTCL2 UNQ1926/PRO4401	0.774343	No	membrane	NULL	NULL	NULL	IPR000859	NULL	TINAGL1	NETO2
Q96J84	KIRREL1	KIRREL1 KIRREL NEPH1	0.774061	No	NULL	NULL	NULL	NULL	NULL	NULL	NULL	KIRREL1
Q15238	PSG5	PSG5	0.773576	No	secreted	NULL	extracellular region	GO:0005576	NULL	NULL	SDC2;GPC1;SDC4;SDC1;TGFB1;SDC3;CSH1;CSH2	PSG5
Q08708	CD300C	CD300C CMRF35 CMRF35A CMRF35A1 IGSF16	0.773394	No	membrane	NULL	NULL	NULL	NULL	NULL	IL2;CLEC5A;LGALS8	CD300C
Q8N149	LILRA2	LILRA2 ILT1 LIR7	0.773354	No	membrane&secreted	NULL	extracellular region	GO:0005576	NULL	NULL	NULL	LILRA2
Q86UN3	RTN4RL2	RTN4RL2 NGRH1 NGRL3	0.772182	No	secreted	NULL	extracellular region|extracellular space|extracellular exosome|extracellular matrix	GO:0005576|GO:0005615|GO:0070062|GO:0031012	IPR000483;IPR003591	NULL	NTNG1;NTNG2;TECTA;TECTB;CD109;SEMA4D	RTN4RL2
Q6UXE8	BTNL3	BTNL3 BTNLR COLF4100 UNQ744/PRO1472	0.771394	No	membrane	NULL	NULL	NULL	NULL	NULL	NULL	BTNL3
P49767	VEGFC	VEGFC	0.770929	Yes	secreted	isExome	extracellular region|extracellular space	GO:0005576|GO:0005615	--	--	--	VEGFC
Q12884	FAP	FAP	0.770545	No	secreted	isExome	negative regulation of extracellular matrix disassembly|negative regulation of extracellular matrix organization|extracellular space	GO:0010716|GO:1903054|GO:0005615	NULL	NULL	FN1;POSTN;COL1A2;COL5A2;COL1A1;LUM;COL3A1;COL12A1;CHAD;THBS2;ASPN;LOX;INS;MMP2;MMP14;ST14	FAP
P78324	SIRPA	SIRPA BIT MFR MYD1 PTPNS1 SHPS1 SIRP	0.770525	No	membrane	isExome	extracellular exosome	GO:0070062	NULL	NULL	THBS1;DMBT1;CLEC5A;CLEC4C;CLEC12A;CLEC4D;PLAU;ADAM8;SERPINB6;ADAM10;SFTPD;MBL2;IGF1;SFTPA1;CLEC9A;FLT3LG;CSF2;ITLN1;CSF1;IL10;IL4;TNF;CD209;SFTPA2	SIRPA
Q02487	DSC2	DSC2 CDHF2 DSC3	0.770242	No	membrane	isExome	extracellular exosome	GO:0070062	NULL	NULL	COL17A1;TCHH;FLG;TGM1;RPTN;PI3;CELA2A;CSTA;TGFB3	DSC2
P55287	CDH11	CDH11	0.77	No	membrane&secreted	isExome	extracellular exosome	GO:0070062	NULL	NULL	COL3A1;POSTN;COL1A2;COL5A2;COL1A1;FN1;SPARC;DCN;CTGF;COL5A1;COL6A3;BGN;MFAP4;LUM;COL12A1;CTHRC1;ASPN;FBN1;VCAN;ADAM33;MMP2;ADAM19;IL17A;ADAM10;CXCL12;SULF1	CDH11
Q9Y5F8	PCDHGB7	PCDHGB7	0.769838	No	membrane	NULL	NULL	NULL	NULL	NULL	NULL	PCDHGB7
Q86UP0	CDH24	CDH24 CDH11L UNQ2834/PRO34009	0.769697	No	membrane	NULL	NULL	NULL	NULL	NULL	FRAS1;S100A16	CDH24
Q6ZSA7	LRRC55	LRRC55	0.769455	No	membrane	NULL	NULL	NULL	IPR000483;IPR003591;IPR000372	NULL	NULL	LRRC55
P27487	DPP4	DPP4 ADCP2 CD26	0.769374	No	membrane	isExome	extracellular region|extracellular exosome|negative regulation of extracellular matrix disassembly	GO:0005576|GO:0070062|GO:0010716	NULL	CCL22;CXCL11;CXCL11;CXCL10;CXCL10;CCL5;CXCL2;CXCL2;CXCL12;CXCL12;CXCL12;CCL11;CCL11;CXCL9;CXCL9	FN1;CHAD;ADIPOQ;INS;MEP1B;MEP1A;CXCL12;VEGFA;CCL5;LEP;IL13;CXCL10;REG1A;ITIH4;INS-IGF2;CCL22;IL6;CCL11;GPC3;IL2;CCL3L3;IL1A;CXCL9;CXCL11;TNF;CSF3;SERPINE1;CCL2;CTSC;KNG1;IL10;MMP9;MMP2	DPP4
Q16819	MEP1A	MEP1A	0.768889	Yes	membrane	isExome	extracellular space|extracellular exosome	GO:0005615|GO:0070062	--	--	--	MEP1A
Q96JA1	LRIG1	LRIG1 LIG1	0.768768	No	membrane	NULL	extracellular space|extracellular matrix	GO:0005615|GO:0031012	IPR000483;IPR003591;IPR000372	NULL	RSPO1;SMOC2;EGF;HGF;NRG1;ADAMTS9;C1QTNF4;ADAMTS20	LRIG1
Q13201	MMRN1	MMRN1 ECM EMILIN4 GPIA* MMRN	0.768586	Yes	secreted	isExome	collagen-containing extracellular matrix|extracellular matrix|extracellular region|extracellular matrix structural constituent	GO:0062023|GO:0031012|GO:0005576|GO:0005201	--	--	--	MMRN1
Q8WX77	IGFBPL1	IGFBPL1 IGFBPRP4	0.767879	Yes	secreted	NULL	extracellular space	GO:0005615	--	--	--	IGFBPL1
P22692	IGFBP4	IGFBP4 IBP4	0.767717	Yes	secreted	isExome	extracellular region|extracellular space	GO:0005576|GO:0005615	--	--	--	IGFBP4
Q8TAB3	PCDH19	PCDH19 KIAA1313	0.767657	No	membrane	NULL	NULL	NULL	NULL	NULL	SRPX2;LGI1;SERPINI2	PCDH19
O00533	CHL1	CHL1 CALL	0.767616	No	membrane&secreted	NULL	extracellular exosome	GO:0070062	IPR003961	NULL	NCAN;RELN;NTN1;GDNF;BDNF;NGF;FGF2;PTN;S100A10;NTF3;SEMA3A;EGF;S100B;NTF4;SHH	CHL1
P11465	PSG2	PSG2 PSBG2	0.767515	No	secreted	NULL	extracellular region	GO:0005576	NULL	NULL	SDC2;TGFB1;SDC3;GPC1;SDC1;SDC4	PSG2
Q9HCJ2	LRRC4C	LRRC4C KIAA1580 NGL1 UNQ292/PRO331	0.76701	No	membrane	NULL	extracellular space	GO:0005615	IPR003591;IPR000372	NTNG1;NTNG1;NTNG1;NTNG1;NTNG2;NTNG2	NTNG1;NTNG2	LRRC4C
P20273	CD22	CD22 SIGLEC2	0.766909	No	membrane&secreted	isExome	extracellular exosome	GO:0070062	NULL	NULL	TNFSF13B;SDC1;IL2;TNF;IL10;CD209;IL4;IL6	CD22
P55001	MFAP2	MFAP2 MAGP1	0.766848	Yes	secreted	NULL	collagen-containing extracellular matrix|extracellular matrix organization|extracellular region|extracellular matrix structural constituent	GO:0062023|GO:0030198|GO:0005576|GO:0005201	--	--	--	MFAP2
Q13316	DMP1	DMP1	0.766566	Yes	secreted	NULL	extracellular region|extracellular matrix binding|extracellular matrix organization|extracellular matrix	GO:0005576|GO:0050840|GO:0030198|GO:0031012	--	--	--	DMP1
P39656	DDOST	DDOST KIAA0115 OST48 OK/SW-cl.45	0.766444	No	membrane&secreted	isExome	NULL	NULL	NULL	NULL	LGALS3;ANXA11;LMAN1	DDOST
O95157	NXPH3	NXPH3 KIAA1159 NPH3 UNQ687/PRO1327	0.766424	No	secreted	NULL	extracellular region	GO:0005576	NULL	NULL	TINAGL1;NPNT	NXPH3
O94769	ECM2	ECM2	0.766242	Yes	secreted	NULL	extracellular matrix organization|extracellular matrix	GO:0030198|GO:0031012	--	--	--	ECM2
P98153	DGCR2	DGCR2 IDD KIAA0163	0.766101	No	membrane	NULL	NULL	NULL	IPR001304;IPR001007	NULL	NULL	DGCR2
P09958	FURIN	FURIN FUR PACE PCSK3	0.765455	No	membrane&secreted	isExome	extracellular region|extracellular exosome|extracellular matrix disassembly|extracellular matrix organization	GO:0005576|GO:0070062|GO:0022617|GO:0030198	NULL	MSTN;MSTN;MMP14;SERPINH1	COL23A1;FBN1;FBN3;FBN2;COL25A1;GAS6;BGLAP;COL26A1;ZP3;VWF;CILP2;RSPO4;RSPO3;RSPO1;FN1;CILP;THBS1;ZP4;HSPG2;RSPO2;ACAN;FRAS1;MMP14;TGFB1;MMP25;NGF;MMP17;MMP24;MMP16;MMP15;MMP11;GPC3;F2;F9;PDGFB;FLG;F10;F7;NODAL;ADAM19;ADAMTS4;ADAMTS1;MMP28;ADAMTS7;ADAM10;ADAMTS3;VEGFA;MSTN;ADAM17;ADAMTS6;EGF;ITIH4;TNFSF13;PLG;HPX;ADAMTS20;BMP1;SERPINB8;SULF2;CD109;CPAMD8;MMP2;EDA;INS;CTSL;TIMP2;MMP9;ADAMTS9;ADAMTS…	FURIN
Q6UX52	C17orf99	C17orf99 IL40 UNQ464/PRO809	0.765253	No	secreted	NULL	extracellular space	GO:0005615	NULL	NULL	NULL	C17orf99
Q9NY59	SMPD3	SMPD3	0.765071	No	membrane	NULL	NULL	NULL	NULL	GDF9;TNF	SPARC;TNF;ANXA2	SMPD3
Q86UN2	RTN4RL1	RTN4RL1 NGRH2 NGRL2	0.765051	No	secreted	NULL	extracellular region|extracellular space|extracellular exosome|extracellular matrix	GO:0005576|GO:0005615|GO:0070062|GO:0031012	IPR000483;IPR003591	NULL	NTNG1;NTNG2;TECTA;TECTB;NCAN;BCAN;CD109;SERPINE2;ADAM22;NRG3	RTN4RL1
Q12907	LMAN2	LMAN2 C5orf8	0.764949	No	membrane&secreted	isExome	extracellular space|extracellular exosome	GO:0005615|GO:0070062	NULL	NULL	COL7A1;BCAN;NCAN;CTSZ;CTSC;LMAN1;LMAN1L;SERPINA1;AREG;TGFA;MUC1;MBL2	LMAN2
Q08554	DSC1	DSC1 CDHF1	0.764828	No	membrane	isExome	extracellular exosome	GO:0070062	NULL	NULL	COL17A1;FLG;TGM1;RPTN;TCHH;CELA2A;PI3;CSTA;SERPINB12;SERPINB7;SERPINA12;FLG2	DSC1
Q96AP7	ESAM	ESAM UNQ220/PRO246	0.764727	No	membrane	isExome	NULL	NULL	NULL	NULL	VWF;EGFL7;VEGFA;TNF	ESAM
Q7Z2D5	PLPPR4	PLPPR4 KIAA0455 LPPR4 PHP1 PRG1	0.764667	No	membrane	NULL	NULL	NULL	NULL	NULL	NULL	PLPPR4
O75509	TNFRSF21	TNFRSF21 DR6 UNQ437/PRO868	0.764485	No	membrane	isExome	NULL	NULL	NULL	NULL	TNFSF10;IL6;FASLG;TNF;TNFSF15	TNFRSF21
Q9Y336	SIGLEC9	SIGLEC9 UNQ668/PRO1302	0.764384	No	membrane	NULL	NULL	NULL	NULL	NULL	MUC16	SIGLEC9
P06213	INSR	INSR	0.764222	No	membrane	isExome	extracellular exosome	GO:0070062	IPR003961	DCN;INS;INS;INS;IGF1;IGF1;IGF1	BGLAP;ADIPOQ;IGFBP1;NELL2;NELL1;FN1;IGFBP3;DCN;FBN3;INS;IGF1;IGF2;INS-IGF2;EGF;KITLG;BDNF;FGF19;NGF;VEGFA;FGF2;FGF4;FGF5;FGF21;FGF23;FGF10;FGF7;FGF1;CSF1;ANGPT2;NTF4;HGF;NTF3;FGF9;FGF22;FGF3;FGF6;S100B;FGF8;FGF17;FGF20;FGF16;VEGFB;PDGFB;ANGPT1;VEGFC;PDGFA;FGF18;PDGFC;EREG;PGF;ANGPT4;FIGF;TGFA;AREG;FLT3LG;PDGFD;ITIH4;LEP;MSTN;BMP4;BMP2	INSR
Q9BZV3	IMPG2	IMPG2 IPM200	0.763859	Yes	membrane	NULL	extracellular matrix|extracellular matrix structural constituent	GO:0031012|GO:0005201	--	--	--	IMPG2
Q01113	IL9R	IL9R	0.763232	No	membrane	NULL	extracellular space	GO:0005615	IPR003961	NULL	IL9;IL4;IL7;IL2;IL5;IL13;IL15;IL10;IL3;IFNG;IL6;CSF2;IL24;IL19;IFNA2;IL22;IL23A;CSF3;IL11;IL17D;EPO;CTF1;EGF;IFNA13;OSM;CNTF;LEP;IFNA1;LIF;IL12A;IFNA4;IL12B;IFNA10;IFNA14;IFNA8;PRL;IFNA17;IFNW1;CSH2;IFNE;CSH1;PDGFA;IFNK;THPO;IFNA5;PDGFB;IFNA16;IFNA6;IFNA7;IFNB1;GH1;IL20;IFNA21;CCL17;CCL11	IL9R
Q5VX71	SUSD4	SUSD4 UNQ196/PRO222	0.762808	No	membrane	NULL	extracellular region	GO:0005576	IPR000436	NULL	FLG2;S100A5	SUSD4
Q99523	SORT1	SORT1	0.762687	No	membrane	isExome	NULL	NULL	NULL	CSPG4;NGF;NGF;NGF;NGF;NGF;BDNF	CILP2;NGF;BDNF;ADAM17;CTSD;NTF4;NTF3;ANGPTL3;INS;ADAMTS7	SORT1
P32926	DSG3	DSG3 CDHF6	0.762404	No	membrane	isExome	extracellular exosome	GO:0070062	NULL	NULL	COL17A1;FLG;RPTN;TGM1;TCHH;PI3;CSTA;CELA2A;SERPINB13;IL4;SERPINA4;ADAMTS13;A2ML1	DSG3
P16471	PRLR	PRLR	0.762222	No	membrane&secreted	NULL	extracellular region	GO:0005576	IPR003961	PRL;PRL;PRL;PRL;PRL;PRL;GH1	TINAGL1;PRL;GH1;CSH1;GH2;HBEGF;CSH2;EGF;OSM;EPO;IL3;LEP;IL7;CSF2;THPO;IL2;IFNG;CSF3;IL6;IL4;IL10;IFNA1;IL5;IFNA16;IFNA10;IFNA14;CNTF;IFNA8;IFNA7;LIF;PDGFB;IL15;IL13;IFNA6;IFNA13;IL11;IFNW1;IFNA17;PDGFA;IFNA4;IFNA21;IFNK;IFNA2;IL20;IFNE;IL22;IFNB1;IL23A;IL17D;IFNA5;IL9;IL19;IL12A;CTF1;IL12B;IL24;WNT9B;GDF9;INS;IGF1;CRLF3;WNT11	PRLR
Q14982	OPCML	OPCML IGLON1 OBCAM	0.762121	No	secreted	NULL	extracellular region	GO:0005576	NULL	NULL	NTNG1;NTNG2;TECTA;TECTB;NCAN;FNDC1;CD109;SFRP1;CBLN1	OPCML
P42830	CXCL5	CXCL5 ENA78 SCYB5	0.76198	Yes	secreted	NULL	extracellular region|extracellular space	GO:0005576|GO:0005615	--	--	--	CXCL5
P06870	KLK1	KLK1	0.761899	No	secreted	isExome	extracellular exosome	GO:0070062	NULL	NULL	IGFBP3;IGFALS;SPON1;IGF1;IGF2;KNG1;SERPINA4;NGF;SERPINA5;AMBP;EGF;SERPINA6;SERPINA1;SERPINA7	KLK1
Q9NQ30	ESM1	ESM1	0.761737	Yes	secreted	isExome	extracellular region	GO:0005576	--	--	--	ESM1
Q92876	KLK6	KLK6 PRSS18 PRSS9	0.761636	No	secreted	isExome	extracellular region|extracellular space	GO:0005576|GO:0005615	NULL	COL4A1;FGA;FGB;COL4A2;COL4A5;COL4A4;COL4A3;COL4A6	SPON1;EMID1;FGA;FGB;A2ML1;KNG1;EGF;FLG;IL6;SERPINC1;SLPI;SERPINF2;CTSD	KLK6
Q9ULL4	PLXNB3	PLXNB3 KIAA1206 PLXN6	0.761616	Yes	membrane	isExome	NULL	NULL	--	--	--	PLXNB3
O60500	NPHS1	NPHS1 NPHN	0.761434	No	membrane&secreted	isExome	extracellular exosome	GO:0070062	IPR003961	NULL	FN1;COL4A4;COL4A3;CTGF;PRG4;COL4A5;NTN1;PAPLN;AGT;TNF;VEGFA;SULF1;PLXNA1;SHH;INS;CLCF1;IL17A;CCL2;F2	NPHS1
Q9UQ49	NEU3	NEU3	0.761394	No	intracellular	NULL	NULL	NULL	NULL	NULL	CTSA;ADAM11;ADAM28;ADAM9;MMP9;ADAM15;ADAM19;SULF1;ADAM30;ADAM22;ADAM8	NEU3
P25445	FAS	FAS APT1 FAS1 TNFRSF6	0.761212	No	membrane&secreted	isExome	extracellular exosome	GO:0070062	NULL	FASLG;FASLG;FASLG;FASLG;FASLG	TGFBI;FASLG;TNFSF10;TNF;IL7;IL4;IL2;IL17A;ANXA5;CXCL8;IL6;IL10;SDC1;IFNG;IL15;TNFSF13B;CSF2;IL1B;IL5;IL18;VEGFA;CCL2;ITIH4	FAS
P25942	CD40	CD40 TNFRSF5	0.760909	No	membrane&secreted	isExome	extracellular exosome	GO:0070062	NULL	NULL	FN1;TNF;IL10;IL6;CSF2;IL2;IL4;IL17A;IL15;CCL2;IFNG;IL18;FASLG;TNFSF13B;TNFSF11;TNFSF4;CXCL13;CXCL8;IL1A;CCL5;IL1B;IFNB1;CD209;CXCL10;IL5;IL13;TNFSF9;IL7;SDC1;LTA;SERPINB3;CCL3;LEP;CCL19;CCL4;ANXA5;HGF;CXCL9;CCL21;CCL22;CXCL1;TNFSF8;CLEC4C;VEGFA;FLT3LG;CCL17;SERPINB2;IL3;CSF1;CXCL12;IFNA1;SERPINB8;SERPINB7;CXCL2;SERPINB5;CLEC7A;MMP9;TNFSF18;CLEC9A;TNFSF10;CCL20;CSF3;PRL;INS;CLEC2D;IL9;CXCL5;LGALS9…	CD40
Q04912	MST1R	MST1R PTK8 RON	0.760768	No	membrane	isExome	NULL	NULL	NULL	PLXNB2;PLXNB2;PLXNB1;PLXNB1;PLXNB1;MST1;MST1;MST1;MST1;MST1;PLXNB3;PLXNB3	MST1;HYAL2;SPAM1;SEMA3B;VEGFA;SEMA6A;HGF;ST14;HYAL1;SEMA6B;SEMA3F;SEMA4D;PLXNB1;PLXNB2;PLXNB3;TNF;SEMA4B;SEMA4G;PLXNC1;SEMA6D;SEMA3E;SEMA5A;SEMA7A;SEMA4C;SEMA5B;SEMA4A;SEMA3G;SEMA3D;SEMA6C;IGF1;SEMA3C;INS;SEMA3A;SEMA4F;HGFAC	MST1R
P43629	KIR3DL1	KIR3DL1 CD158E NKAT3 NKB1	0.760768	No	membrane	NULL	NULL	NULL	NULL	NULL	IL15;COLEC11;IL2;COLEC10;IL18;MASP2;FCN1;FCN3;MASP1;FCN2;LTA	KIR3DL1
Q86UP6	CUZD1	CUZD1 UNQ224/PRO257	0.760747	No	membrane	NULL	NULL	NULL	IPR000859;IPR001507	NULL	LAMC2;MEP1A;CELA2A;REG1B;CELA2B;CELA3A;CELA3B;ANGPTL6	CUZD1
Q9BXI9	C1QTNF6	C1QTNF6 CTRP6 UNQ581/PRO1151	0.760747	Yes	intracellular	NULL	extracellular space	GO:0005615	--	--	--	C1QTNF6
Q5VWK5	IL23R	IL23R	0.760182	No	membrane	NULL	NULL	NULL	IPR003961	IL23A	IL23A;IL12B;IL6;IL17A;IL22;IL10;IL4;IL2;IL13;CSF2;IL17F;IFNG;IL9;IL5;IL7;IL15;IL12A;IL17D;IL19;IFNA1;CSF3;IL24;IL11;IFNA13;IL3;LIF;CNTF;PDGFB;IFNB1;TNFSF15;EGF;LEP;OSM;CTF1;EPO;IL20;PRL;IFNA2;IFNW1;IFNE;THPO;IFNA8;IFNA14;IFNA17;IFNK;IFNA10;IFNA7;IFNA4;CSH1;IFNA21;IFNA5;GH1;IFNA6;PDGFA;CSH2;IFNA16;TNF;IL26;CCL20;IL18;CCL27;IL17C;CXCL8;IL1B;IL25;CLEC7A	IL23R
P78552	IL13RA1	IL13RA1 IL13R IL13RA	0.759515	No	membrane&secreted	NULL	NULL	NULL	IPR003961	IL4;IL13;IL13;IL13;IL13	IL13;IL4;IL11;IL15;IL5;IL6;IL19;IL2;IFNG;IL10;IL9;IL7;IL3;CSF2;IFNA2;CNTF;OSM;LIF;IFNB1;CSF3;IL12A;IFNE;IL22;IFNA10;IL24;IFNA13;IL17D;IFNA1;EGF;CTF1;GH1;LEP;PDGFB;IL23A;IL12B;IFNA8;IFNA16;CSH2;THPO;IFNA5;IFNA17;IFNA14;IFNA6;PRL;IFNW1;IFNA7;CSH1;IFNK;PDGFA;EPO;IL20;IFNA4;IFNA21	IL13RA1
Q6ZWK6	TMPRSS11F	TMPRSS11F HATL4	0.759253	No	membrane	NULL	extracellular region	GO:0005576	IPR000082	NULL	CLEC10A;ADAM32	TMPRSS11F
Q96P31	FCRL3	FCRL3 FCRH3 IFGP3 IRTA3 SPAP2	0.759172	No	membrane&secreted	NULL	NULL	NULL	NULL	NULL	MUC1	FCRL3
Q9BXX0	EMILIN2	EMILIN2	0.75899	Yes	secreted	isExome	collagen-containing extracellular matrix|extracellular matrix constituent conferring elasticity|extracellular matrix|extracellular region	GO:0062023|GO:0030023|GO:0031012|GO:0005576	--	--	--	EMILIN2
P22362	CCL1	CCL1 SCYA1	0.758949	Yes	secreted	NULL	extracellular region|extracellular space	GO:0005576|GO:0005615	--	--	--	CCL1
Q7RTY9	PRSS41	PRSS41 TESSP1	0.758808	No	secreted	NULL	extracellular region	GO:0005576	NULL	NULL	NULL	PRSS41
P54826	GAS1	GAS1	0.758788	No	secreted	NULL	NULL	NULL	NULL	NULL	SHH;IHH;DHH;HHIP	GAS1
Q8TDQ0	HAVCR2	HAVCR2 TIM3 TIMD3	0.758525	No	membrane	NULL	NULL	NULL	NULL	NULL	MFGE8;LGALS9;IL2;TNF;IL4;IL10;IL15;CXCL8;LGALS3;IFNG;CLEC12A;IL17A;LGALS9C;LGALS9B;IL7;IL6;FASLG;COLEC10;CSF2;TNFSF9;CXCL10;VEGFA;ANXA5;IL18;IL13;TNFSF14;CCL5;SEMA4A	HAVCR2
Q9UN70	PCDHGC3	PCDHGC3 PCDH2	0.758465	No	membrane	NULL	NULL	NULL	NULL	NULL	NULL	PCDHGC3
Q9Y240	CLEC11A	CLEC11A CLECSF3 LSLCL SCGF	0.758444	Yes	secreted	isExome	extracellular space|extracellular region	GO:0005615|GO:0005576	--	--	--	CLEC11A
Q6UXM1	LRIG3	LRIG3 LIG3 UNQ287/PRO326/PRO335	0.758404	No	membrane	NULL	extracellular space|extracellular matrix	GO:0005615|GO:0031012	IPR000483;IPR003591	NULL	NTN1;SDC4	LRIG3
Q9P2E7	PCDH10	PCDH10 KIAA1400	0.75796	No	membrane	NULL	NULL	NULL	NULL	NULL	NULL	PCDH10
O14763	TNFRSF10B	TNFRSF10B DR5 KILLER TRAILR2 TRICK2 ZTNFR9 UNQ160/PRO186	0.757576	No	membrane	isExome	NULL	NULL	NULL	TNFSF10;TNFSF10;TNFSF10;TNFSF10;TNFSF10;TNFSF10;TNFSF10;TNFSF10;TNFSF10;TNFSF10;TNFSF10;TNFSF10;TNFSF10;TNFSF10;TNFSF10;TNFSF10;TNFSF10;TNFSF10;TNFSF10;TNFSF10;TNFSF10;TNFSF10;TNFSF10;TNFSF10;TNFSF10	TNFSF10;FASLG;TNF;ANXA5;MMP1;TNFSF12;VEGFA;IL6;CXCL8;IL2	TNFRSF10B
Q86XK7	VSIG1	VSIG1 GPA34	0.75703	No	membrane&secreted	NULL	NULL	NULL	NULL	NULL	CTSE;MUC5AC	VSIG1
O14498	ISLR	ISLR UNQ189/PRO215	0.75701	No	secreted	NULL	extracellular exosome|extracellular region	GO:0070062|GO:0005576	IPR000483;IPR003591	NULL	VWF;SPARC;FN1;GAS6;THBS1;MMRN1;FGG;FGA;FGB;SRGN;COL3A1;ASPN;FMOD;DPT;COL1A1;FBLN1;SERPING1;TGFB3;VEGFB;A2M;F13A1;PLG;HGF;IGF1;IGF2;TGFB2;TIMP1;VEGFC;PF4;FIGF;TGFB1;EGF;LEFTY2;SERPINA1;KNG1;HRG;PPBP;PDGFB;VEGFA;SERPINF2;SERPINE1;ADAMTS16;GPC2	ISLR
P10912	GHR	GHR	0.75697	No	membrane	NULL	extracellular region|extracellular space	GO:0005576|GO:0005615	IPR003961	GH1;GH1;GH1	IGFBP3;IGFBP1;IGFALS;COCH;IGFBP2;SPP1;IGFBP4;SPARC;SPARCL1;IGFBP5;DMBT1;GH1;GH2;PRL;CSH1;CSH2;ADAM17;IGF1;LEP;IL7;EPO;CSF2;IL2;EGF;IL6;IL3;OSM;CSF3;IL4;INS;THPO;LIF;CNTF;IGF2;CTF1;IL10;IFNG;PDGFA;IL12B;PDGFB;IL15;IL5;IL11;IFNB1;IFNK;IL22;IFNA13;IL17D;IL20;IFNA1;IFNA6;IFNA16;IFNA4;IFNA2;IFNW1;IFNA21;IFNA17;IFNA5;IL23A;IFNA10;IL12A;IL9;IL19;IFNA8;IFNA14;IL13;IFNE;IFNA7;IL24;KITLG	GHR
Q32P28	P3H1	P3H1 GROS1 LEPRE1 PSEC0109	0.756929	Yes	secreted	isExome	collagen-containing extracellular matrix|extracellular exosome	GO:0062023|GO:0070062	--	--	--	P3H1
O15389	SIGLEC5	SIGLEC5 CD33L2 OBBP2	0.756848	No	membrane	NULL	NULL	NULL	NULL	LEP	NULL	SIGLEC5
Q9UGM5	FETUB	FETUB	0.756667	No	secreted	NULL	extracellular exosome|extracellular region	GO:0070062|GO:0005576	NULL	NULL	FGG;FGA;FGB;ZP2;SPOCK2;COL1A2;ITIH2;AMBP;SERPINC1;HRG;ITIH3;LPA;PLG;ASTL;HABP2;F9;CST7;MBL2;F13B;SERPINA10;ANGPTL3;ADAM2;ITIH4;F12;SERPINA1;HGFAC;HPX;CST6;BMP1;PZP;GDF9;SEMA3D;F2;ITIH5;HGF	FETUB
Q96JQ0	DCHS1	DCHS1 CDH19 CDH25 FIB1 KIAA1773 PCDH16	0.756525	No	membrane	NULL	NULL	NULL	NULL	NULL	NULL	DCHS1
Q7L513	FCRLA	FCRLA FCRL FCRL1 FCRLM1 FCRX FREB UNQ291/PRO329	0.756485	No	membrane&secreted	isExome	NULL	NULL	NULL	NULL	NULL	FCRLA
Q9NZ94	NLGN3	NLGN3 KIAA1480 NL3	0.756101	No	membrane&secreted	NULL	NULL	NULL	NULL	FBLN1;FBLN1;C1QA;C1QA;CTSD;CTSD;LGALS1;LGALS1;GDF15;GDF15	RELN;SERPINI1;CBLN1;BDNF;SEMA5A	NLGN3
Q07837	SLC3A1	SLC3A1 RBAT	0.756081	No	membrane&secreted	isExome	extracellular exosome	GO:0070062	NULL	NULL	F10;AGT	SLC3A1
P58401	NRXN2	NRXN2	0.756061	No	membrane&secreted	NULL	NULL	NULL	IPR001791	NULL	PCOLCE;SPARCL1;NCAN;CBLN1;CBLN2;CBLN4;CBLN3	NRXN2
A8MTB9	CEACAM18	CEACAM18	0.75602	No	secreted	NULL	NULL	NULL	NULL	NULL	DMBT1	CEACAM18
Q9UBU2	DKK2	DKK2 UNQ682/PRO1316	0.755717	No	secreted	NULL	extracellular space|extracellular negative regulation of signal transduction	GO:0005615|GO:1900116	NULL	NULL	RSPO2;WNT3A;WNT1;WNT8B;WNT8A;SFRP2;WIF1;SFRP1;SFRP5;SFRP4;WNT6;FRZB;WNT2B;WNT2;WNT5A;WNT7B;WNT10B;WNT11;WNT7A;WNT16;WNT5B;WNT4;WNT10A;WNT9A;WNT3	DKK2
Q30134	HLA-DRB1	HLA-DRB1	0.755596	No	membrane	isExome	extracellular exosome	GO:0070062	NULL	NULL	CTSS;CTSH;CTSC;CTSB;CTSO;CTSD;CTSE;CTSL;CTSK;CTSV;CTSF;CTSA;INS;TNF;S100A8;IL2;LTA;IL10;ANXA11;IL6;C1QA;IFNG;IL4;IL17A;C1QB	HLA-DRB1
Q96QV1	HHIP	HHIP HIP UNQ5825/PRO19644	0.755313	Yes	membrane&secreted	NULL	extracellular region	GO:0005576	--	--	--	HHIP
Q8N109	KIR2DL5A	KIR2DL5A CD158F CD158F1 KIR2DL5	0.755131	No	NULL	NULL	NULL	NULL	NULL	NULL	NULL	KIR2DL5A
P04217	A1BG	A1BG	0.75497	No	secreted	isExome	extracellular space|extracellular exosome|collagen-containing extracellular matrix|extracellular region	GO:0005615|GO:0070062|GO:0062023|GO:0005576	NULL	ANXA7	FGG;FGB;FGA;FN1;THBS1;SPARC;VWF;MMRN1;GAS6;SRGN;LRG1;SERPINA1;HRG;A2M;KNG1;EGF;HGF;IGF1;IL6;SERPINF2;SERPING1;PLG;VEGFA;IGF2;F13A1;TIMP1;PF4;PPBP;SERPINE1;TGFB1;TGFB3;FIGF;VEGFC;VEGFB;LEFTY2;TGFB2;PDGFB;HPX;ITIH1;ITIH4;SERPINC1	A1BG
O14798	TNFRSF10C	TNFRSF10C DCR1 LIT TRAILR3 TRID UNQ321/PRO366	0.754747	No	membrane	NULL	NULL	NULL	NULL	TNFSF10	TNFSF10;FASLG;TNF;ANXA5	TNFRSF10C
Q01459	CTBS	CTBS CTB	0.754687	No	secreted	NULL	extracellular space	GO:0005615	NULL	NULL	PGF;CSH1;CSH2;IL4	CTBS
Q14515	SPARCL1	SPARCL1	0.754606	Yes	secreted	NULL	collagen-containing extracellular matrix|extracellular region|extracellular matrix binding|extracellular space	GO:0062023|GO:0005576|GO:0050840|GO:0005615	--	--	--	SPARCL1
O75096	LRP4	LRP4 KIAA0816 LRP10 MEGF7	0.754525	No	membrane&secreted	isExome	NULL	NULL	IPR001881	NULL	AGRN;EGFLAM;COLQ;WNT7A	LRP4
P20851	C4BPB	C4BPB	0.754121	No	secreted	isExome	extracellular space|extracellular region	GO:0005615|GO:0005576	IPR000436	NULL	VWA3B;SERPIND1	C4BPB
O14917	PCDH17	PCDH17 PCDH68 PCH68	0.754101	No	membrane	NULL	NULL	NULL	NULL	ZP3;ZP3	C1QC	PCDH17
Q96RL6	SIGLEC11	SIGLEC11 UNQ9222/PRO28718	0.754081	No	membrane	NULL	NULL	NULL	NULL	NULL	SPON1;TNF	SIGLEC11
Q14954	KIR2DS1	KIR2DS1 CD158H	0.753616	No	NULL	NULL	NULL	NULL	NULL	NULL	NULL	KIR2DS1
Q9UBN6	TNFRSF10D	TNFRSF10D DCR2 TRAILR4 TRUNDD UNQ251/PRO288	0.753535	No	membrane	isExome	NULL	NULL	NULL	TNFSF10	TNFSF10;FASLG;TNF;ANXA5	TNFRSF10D
Q8N6C5	IGSF1	IGSF1 IGDC1 KIAA0364 PGSF2	0.753354	No	membrane&secreted	NULL	extracellular region	GO:0005576	NULL	NULL	INHBA;IGF1;PRL	IGSF1
Q9ULB5	CDH7	CDH7 CDH7L1	0.753212	No	membrane	NULL	NULL	NULL	NULL	FGF21	SHH;SEMA6D;SEMA6C	CDH7
Q8NFZ3	NLGN4Y	NLGN4Y KIAA0951	0.75303	No	membrane&secreted	NULL	NULL	NULL	NULL	NULL	NULL	NLGN4Y
P10451	SPP1	SPP1 BNSP OPN PSEC0156	0.75303	Yes	secreted	isExome	extracellular region|extracellular exosome|extracellular matrix binding|extracellular space|extracellular matrix organization	GO:0005576|GO:0070062|GO:0050840|GO:0005615|GO:0030198	--	--	--	SPP1
O75493	CA11	CA11 CARP2 UNQ211/PRO237	0.752424	No	secreted	NULL	extracellular region	GO:0005576	NULL	NULL	NTN5	CA11
Q96MU8	KREMEN1	KREMEN1 KREMEN KRM1	0.752404	No	membrane	NULL	NULL	NULL	IPR000859	NULL	RSPO1;RSPO3;WNT1;WNT3A;WNT8A;WNT8B;WNT2;SFRP1;FRZB;SFRP4;WIF1;SFRP5;SFRP2;WNT4	KREMEN1
P23946	CMA1	CMA1 CYH CYM	0.752404	No	secreted	NULL	extracellular matrix disassembly|collagen-containing extracellular matrix|extracellular region|extracellular space	GO:0022617|GO:0062023|GO:0005576|GO:0005615	NULL	NULL	COL6A5;SRGN;FN1;ELN;AGT;MMP1;KITLG;IL4;CTSC;IL6;KNG1;IL1B;MMP9;SERPINB4;IL13;IL3;TNF;IL5;CXCL8;VEGFA;SERPINB3;SLPI;CCL11;IL9;IL10;FGF2;NGF;CTSD;CCL2;MMP2	CMA1
Q6ISS4	LAIR2	LAIR2 CD306	0.752323	No	secreted	NULL	extracellular region	GO:0005576	NULL	EMILIN1;EMILIN1;EMILIN1	NULL	LAIR2
P14784	IL2RB	IL2RB IL15RB	0.752182	No	membrane&secreted	NULL	NULL	NULL	IPR003961	IL15;IL15;IL15;IL2;IL2	ECM1;IL15;IL2;CSF2;IL5;IL3;IL7;IL4;IFNG;IL10;IL9;IL13;IL6;IL24;IL22;PDGFB;PRL;IFNB1;IFNA1;EPO;EGF;THPO;LEP;IFNA13;CSF3;IL19;IFNA21;IFNA2;IL11;CCL19;OSM;LIF;IL23A;IFNK;IFNA4;IFNA17;IL12A;PDGFA;CTF1;CNTF;IL20;IFNA6;CSH1;IL12B;IFNA16;IFNE;IFNA5;IL17D;IFNA14;IFNA10;GH1;CSH2;IFNW1;IFNA7;IFNA8;XCL2;XCL1;CST7;IL17A;TNF;FASLG;KITLG;CCL5;IL18;IL16;CCL2;ANXA5;CCL4	IL2RB
Q8TB73	NDNF	NDNF C4orf31 UNQ2748/PRO6487	0.752162	Yes	secreted	NULL	extracellular region|extracellular matrix organization|extracellular matrix	GO:0005576|GO:0030198|GO:0031012	--	--	--	NDNF
Q6H3X3	RAET1G	RAET1G ULBP5	0.752141	No	membrane&secreted	NULL	extracellular region|extracellular space	GO:0005576|GO:0005615	NULL	NULL	TECTB;NTNG1;TECTA;NTNG2;CD109	RAET1G
P32942	ICAM3	ICAM3	0.751697	No	membrane	isExome	extracellular exosome|extracellular matrix organization	GO:0070062|GO:0030198	NULL	NULL	CD209;CLEC4M;ITIH4;CLEC7A;CLEC4A;CLEC6A;IL10;MBL2;TNF;IL4;CSF2;IL6;CLEC4D;CLEC4E;CXCL8;CLEC4G;CCL5;CLEC10A;CCL13;CCL2;CLEC2B;IL2	ICAM3
O95972	BMP15	BMP15 GDF9B	0.751677	Yes	secreted	isExome	extracellular space	GO:0005615	--	--	--	BMP15
Q2VWP7	PRTG	PRTG	0.751636	No	membrane&secreted	NULL	extracellular space	GO:0005615	IPR003961	NULL	THBS4	PRTG
O15520	FGF10	FGF10	0.751576	Yes	secreted	NULL	collagen-containing extracellular matrix|extracellular region|extracellular space	GO:0062023|GO:0005576|GO:0005615	--	--	--	FGF10
Q9NR97	TLR8	TLR8 UNQ249/PRO286	0.751374	No	membrane	NULL	NULL	NULL	IPR000483;IPR003591	NULL	FGL2;FN1;TNF;IL6;IL10;CLEC7A;IL1B;CLEC10A;CLEC4A;CXCL8;IL18;CXCL10;CLEC6A;CCL5;CCL2;IL4;IL17A;IFNB1;CSF2;CD209;IL2;CLEC4E;S100A8;TNFSF13B;IL13;CCL4;CLEC4D;CCL3;IL3;CLEC12A;IL1RN;CTSS;IFNG;CLEC5A;S100A12;MMP9;CXCL9;IL5;IFNA1;CXCL1;IL15;INS;CLEC9A;MBL2;FSTL1;CXCL2;S100A9;VEGFA;TNFSF15;CLEC2B;CSF3;CLEC1B;CLEC4C;CSF1;FASLG;CLEC3A;CLEC12B;IL7;TNFSF10;CTSG;CCL20;OSM;ITIH4;IL1A;IFNA2;CTSB;CCL19;FCN1;CCL…	TLR8
P15586	GNS	GNS	0.751131	No	secreted	isExome	extracellular region|extracellular exosome	GO:0005576|GO:0070062	NULL	NULL	CTSA;CTSC;ANXA2;CTSZ;CTSG;ELANE;S100A7;HRNR;SERPINB3;ANXA5;TNFSF10;F2;GPC1	GNS
O60279	SUSD5	SUSD5 KIAA0527	0.750768	No	membrane&secreted	NULL	NULL	NULL	IPR000538;IPR000436	NULL	SNED1;ADAMTSL2;ADAMTS3;ADAMTS6;ADAMTS10;LOXL4	SUSD5
Q5FYB0	ARSJ	ARSJ UNQ372/PRO708	0.750747	No	intracellular	NULL	extracellular region	GO:0005576	NULL	NULL	GPC1	ARSJ
P79483	HLA-DRB3	HLA-DRB3	0.750343	No	NULL	isExome	NULL	NULL	NULL	NULL	NULL	HLA-DRB3
P11464	PSG1	PSG1 B1G1 PSBG1 PSGGA	0.74998	No	secreted	NULL	extracellular region	GO:0005576	NULL	TGFB1;TGFB1;TGFB1;TGFB1;TGFB1	FBLN1;TGFB1;SDC2;GPC1;SDC4;SDC3;SDC1;MEGF8;PAPPA;CSH1;IL2;CSH2	PSG1
P51864	TDGF1P3	TDGF1P3 CRIPTO3 TDGF2 TDGF3	0.749899	No	NULL	NULL	extracellular region	GO:0005576	NULL	NULL	NULL	TDGF1P3
P13726	F3	F3	0.749838	No	membrane	isExome	collagen-containing extracellular matrix|extracellular space	GO:0062023|GO:0005615	IPR003961	F7;F7;F7;F7;F7	VWF;ADIPOQ;FGB;FGL2;FN1;FGG;VTN;FGA;MFGE8;THBS1;F7;F2;F10;F9;SERPINC1;PLG;SERPINE1;TNF;VEGFA;IL6;PLAT;CCL2;PRSS12;INS;IL10;SERPINF2;SERPIND1;PF4;CXCL8;FGF2;KNG1;F12;IL4;ADAMTS13;LEP;ANXA5;IL1B;PLAU;MMP9;LPA;PPBP;SERPINE2;SERPINB2;ANXA4;ELANE;EGF;OSM;A2M;ANXA2;AGT;CTSG;SERPINA1;HRG;SERPING1;CCL5;SERPINA5;IL2;MMP2;EPO;IFNG;CSF3;TIMP1;ANGPT2;PGF	F3
P17301	ITGA2	ITGA2 CD49B	0.749798	No	membrane	isExome	extracellular matrix organization	GO:0030198	IPR002035	COL1A2	FN1;COL1A1;COL3A1;COL1A2;LAMA1;HSPG2;LAMA4;LAMA3;LAMC2;LAMB1;COL4A1;LAMC1;LAMB3;COL11A1;COL4A2;LAMA2;LAMA5;COL4A3;COL6A1;TNC;COL4A5;COL6A2;LAMC3;AGRN;COL4A4;COL4A6;COL2A1;COL16A1;COL7A1;COL6A3;LUM;COL11A2;LAMB2;COL6A5;COL9A1;COL9A3;COL6A6;COL23A1;COL9A2;CHAD;VTN;COL21A1;THBS1;THBS4;VWF;THBS2;LAMB4;SPP1;RELN;TNN;THBS3;TNR;IBSP;COMP;TNXB;EMILIN1;COL8A1;NPNT;SDC1;HGF;SDC2;FIGF;OVGP1;IL6;CBLN1;MMP1;E…	ITGA2
Q14943	KIR3DS1	KIR3DS1 NKAT10	0.749717	No	NULL	NULL	NULL	NULL	NULL	NULL	NULL	KIR3DS1
O95256	IL18RAP	IL18RAP IL1R7	0.749697	No	membrane&secreted	NULL	NULL	NULL	NULL	NULL	TSKU;IL18;S100A12;CST7;IL1F10;IL1RN;IFNG;IL1B	IL18RAP
P09529	INHBB	INHBB	0.749657	Yes	secreted	isExome	extracellular region|extracellular space	GO:0005576|GO:0005615	--	--	--	INHBB
P10144	GZMB	GZMB CGL1 CSPB CTLA1 GRB	0.749455	No	secreted	NULL	NULL	NULL	NULL	FN1;SRGN;SRGN;ELANE	SRGN;FN1;FGL2;IL2;IL15;IL10;IFNG;SERPINB9;FASLG;IL6;CCL4;TNF;CCL5;IL17A;IL4;CXCL10;CXCL9;IL7;IL3;CCL3;CST7;CSF2;IL18;IL13;IL5;TNFSF10;ANXA5;CXCL8;CCL2;CTSC;ELANE;SERPINB6;CXCL11;TNFSF9;TNFSF4;VEGFA;CXCL13;IL22;IL9;SERPINB8;CCL22;LGALS9;CTSW;S100B	GZMB
Q9NT22	EMILIN3	EMILIN3 C20orf130 EMILIN5	0.749253	Yes	secreted	NULL	collagen-containing extracellular matrix|extracellular matrix constituent conferring elasticity|extracellular matrix	GO:0062023|GO:0030023|GO:0031012	--	--	--	EMILIN3
P01912	HLA-DRB1	HLA-DRB1	0.749172	No	membrane	isExome	extracellular exosome	GO:0070062	NULL	NULL	CTSS;CTSH;CTSC;CTSB;CTSO;CTSD;CTSE;CTSL;CTSK;CTSV;CTSF;CTSA;INS;TNF;S100A8;IL2;LTA;IL10;ANXA11;IL6;C1QA;IFNG;IL4;IL17A;C1QB	HLA-DRB1
Q9H8L6	MMRN2	MMRN2 EMILIN3	0.749111	Yes	secreted	isExome	extracellular space|extracellular exosome|collagen-containing extracellular matrix|extracellular matrix|extracellular matrix structural constituent	GO:0005615|GO:0070062|GO:0062023|GO:0031012|GO:0005201	--	--	--	MMRN2
Q86UE6	LRRTM1	LRRTM1 UNQ675/PRO1309	0.748949	No	membrane&secreted	NULL	extracellular space|extracellular matrix	GO:0005615|GO:0031012	IPR003591	NULL	NTNG1;HAPLN2;NTNG2;EPYC;IGFBP7;BGN;PCSK6;CBLN1;PTN	LRRTM1
Q9Y493	ZAN	ZAN	0.748707	No	membrane	NULL	NULL	NULL	IPR001007;IPR001846	NULL	ZP3;TECTB;NID1;ZP2;ZP4;SPAM1;PI3;ADAM2;ADAM15	ZAN
Q8TD46	CD200R1	CD200R1 CD200R CRTR2 MOX2R OX2R UNQ2522/PRO6015	0.748525	No	membrane&secreted	NULL	extracellular region	GO:0005576	NULL	NULL	IL10;IL4;CX3CL1;TNF;IL6;IL13;CSF1	CD200R1
Q6UWN5	LYPD5	LYPD5 UNQ1908/PRO4356	0.748283	No	membrane	NULL	extracellular region	GO:0005576	NULL	NULL	NTNG1;NTNG2;TECTB;TECTA;SBSPON;CD109	LYPD5
P12318	FCGR2A	FCGR2A CD32 FCG2 FCGR2A1 IGFR2	0.74804	No	membrane	isExome	NULL	NULL	NULL	NULL	IL10;IL4;TNF;IL2;IL6;CSF2;IL17A;CLEC7A;LGALS3;CD209;IL13;CCL2;IL5;IL1B;PF4;CTSS;CXCL8;ANXA5;CCL3;CCL5;C1QB;TNFSF13B;CSF1;IFNG;SDC1;C1QC;CXCL10;CLEC12A;IL3;CXCL9;CSF3;TNFSF4;CLEC4A;CCL4;C1QA;IL15;CXCL1;CLEC4C;IL1RN;IL18;IL7	FCGR2A
P43489	TNFRSF4	TNFRSF4 TXGP1L	0.74802	No	membrane	NULL	NULL	NULL	NULL	TNFSF4;TNFSF4	TNFSF4;IL2;TNF;IL4;IL7;TNFSF9;TNFSF8;IL10;IFNG;TNFSF18;CCL20;IL17A;IL13;IL15;CSF2;IL5;IL6;SERPINB8;SERPINB7;SERPINB5;SERPINB2;FASLG;IL9;TNFSF13B;CXCL10;CXCL13;CCL17;LGALS9;CXCL9;CCL22;SERPINB3;CCL4	TNFRSF4
Q6UWM5	GLIPR1L1	GLIPR1L1 UNQ2972/PRO7434	0.746788	No	secreted	NULL	extracellular space	GO:0005615	NULL	NULL	NULL	GLIPR1L1
P55291	CDH15	CDH15 CDH14 CDH3	0.746606	No	membrane	NULL	extracellular exosome	GO:0070062	NULL	NULL	SDC3	CDH15
Q16832	DDR2	DDR2 NTRKR3 TKT TYRO10	0.746505	No	membrane&secreted	isExome	regulation of extracellular matrix disassembly|regulation of extracellular matrix organization|positive regulation of extracellular matrix disassembly|extracellular matrix organization	GO:0010715|GO:1903053|GO:0090091|GO:0030198	NULL	COL11A2;COL11A2	COL3A1;COL5A1;COL1A1;COL4A1;POSTN;FN1;COL2A1;COL5A2;COL1A2;COL11A2;BGN;DCN;FMOD;MMP13;MMP2;MMP1;ADAMTS5;S100A4;LOX;MMP14;P4HA1;P4HA2	DDR2
P17181	IFNAR1	IFNAR1 IFNAR	0.746202	No	membrane&secreted	NULL	NULL	NULL	IPR003961	NULL	GAS6;IFNB1;IFNA2;IFNW1;IFNA8;IFNA21;IFNA17;IFNA4;IFNA6;IFNA14;IFNA1;IFNA7;IFNA16;IFNA10;IFNG;IFNK;IFNE;IL10;IL6;CSF2;IL2;IL4;IL15;IFNA13;IL13;IFNA5;IL7;IL5;IL19;IL24;IL3;IL11;OSM;CSF3;LIF;CNTF;PRL;IL22;IL20;LEP;EPO;EGF;IL23A;IL9;IL17D;IL12A;THPO;IL12B;GH1;PDGFB;CSH2;PDGFA;CTF1;CSH1;CXCL10;TNF;TNFSF4;MMP9;IL18;CCL5;CCL2;IL17A;CXCL9;CLEC4C	IFNAR1
P28325	CST5	CST5	0.746061	Yes	secreted	isExome	extracellular space|extracellular exosome|extracellular region	GO:0005615|GO:0070062|GO:0005576	--	--	--	CST5
Q7Z3B1	NEGR1	NEGR1 IGLON4 UNQ2433/PRO4993	0.746	No	membrane	NULL	extracellular region	GO:0005576	NULL	NULL	NTNG1;NTNG2;TECTB;TECTA;COL24A1;CD109;BDNF;SDC3;S100A9;S100A8	NEGR1
P01611	IGKV1D-12	IGKV1D-12	0.745859	No	NULL	NULL	extracellular region|extracellular space|extracellular exosome	GO:0005576|GO:0005615|GO:0070062	NULL	NULL	NULL	IGKV1D-12
P0DP72	VSIG10L2	VSIG10L2	0.745596	No	NULL	NULL	NULL	NULL	IPR003961	NULL	NULL	VSIG10L2
Q6DKI2	LGALS9C	LGALS9C	0.745596	Yes	intracellular	NULL	NULL	NULL	--	--	--	LGALS9C
O00115	DNASE2	DNASE2 DNASE2A DNL2	0.745515	No	secreted	NULL	extracellular exosome	GO:0070062	NULL	NULL	CTSZ;IFNA13;IFNA1;IFNB1	DNASE2
P24158	PRTN3	PRTN3 MBN	0.745475	No	secreted	isExome	collagen-containing extracellular matrix|extracellular region|extracellular exosome|extracellular space	GO:0062023|GO:0005576|GO:0070062|GO:0005615	NULL	NULL	ELN;ELANE;CTSC;CTSG;SERPINB3;S100A7;ANXA2;CTSA;HRNR;SERPINA1;SERPINB1;TNF;CSF3;IL1B;SLPI;CXCL8;IL6;FLG;SERPINA5;IL18;PI3;IL17A;MMP9;MMP8;OVGP1;IL10;SERPINC1;CSF2;IL2;TNFSF13B;MMP12	PRTN3
P51690	ARSE	ARSE	0.745333	No	membrane&secreted	isExome	extracellular exosome	GO:0070062	NULL	NULL	MGP;SULF1;SULF2;LEFTY1;LEFTY2	ARSE
Q13651	IL10RA	IL10RA IL10R	0.745212	No	membrane	NULL	NULL	NULL	IPR003961	IL10;IL10;IL10;IL10;IL10;IL10;IL10;IL10;IL10	FGL2;IL10;IL22;CTSS;IL6;IL4;IL2;IFNG;IL13;IL24;IL19;IL5;IL15;CSF2;OSM;IL7;IL23A;IL9;IL3;IL11;CSF3;IFNA21;IFNA17;IFNA2;LIF;IFNB1;IFNA1;IFNA13;IL12A;EGF;CNTF;TNF;LEP;IL17D;IL12B;PDGFB;EPO;IL20;CTF1;PDGFA;IFNE;IFNA4;IFNA7;IFNA16;PRL;IFNA10;IFNA8;IFNA14;IFNK;IFNA6;THPO;IFNW1;CSH1;CSH2;IFNA5;GH1;CCL4;IL17A;IL26;CCL3;CCL5;IL1RN;CXCL10;IL1B;IL18;IL16;S100A4;CXCL8;CXCL9;CCL2;C1QA;CLEC10A;TNFSF8;C1QB;F13A1	IL10RA
A1L4H1	SSC5D	SSC5D	0.744889	No	secreted	NULL	collagen-containing extracellular matrix|extracellular matrix binding|extracellular space	GO:0062023|GO:0050840|GO:0005615	NULL	NULL	NULL	SSC5D
Q07011	TNFRSF9	TNFRSF9 CD137 ILA	0.744848	No	membrane	NULL	NULL	NULL	NULL	NULL	TNFSF9;IL2;TNF;IL15;IL6;TNFSF4;IL13;IL10;TNFSF8;CXCL8;TNFSF18;CSF2;IL7;IFNG;IL4;FASLG;IL1B;IL17A;CCL5;TNFSF10;LGALS9;MUC1;VEGFA	TNFRSF9
O95944	NCR2	NCR2 LY95	0.744768	No	membrane	NULL	NULL	NULL	NULL	NULL	IL15;IL2;CCL27;IL18;IL3;IL17A;FASLG;TNF;CLEC4C;IL10;CSF2;IL7;IL22;IFNG;TNFSF9;IL13	NCR2
Q6BAA4	FCRLB	FCRLB FCRL2 FCRLM2 FCRY FREB2	0.744667	No	secreted	NULL	NULL	NULL	NULL	NULL	EBI3	FCRLB
Q6P988	NOTUM	NOTUM OK/SW-CL.30	0.744606	No	secreted	NULL	extracellular region	GO:0005576	NULL	WNT7A;GPC3;WNT3A	IGFBP1;FGG;FGA;IGFBP7;FN1;MATN3;VWA1;FBN1;IGFBP3;IGFBP4;AMBN;LAMB1;LAMB2;SPP1;MFGE8;VCAN;TNC;DMP1;LAMC1;SPARCL1;AMELX;GAS6;IGFBP5;MEPE;CYR61;LTBP1;GPC3;WNT1;GPC5;SHH;BMP4;IHH;DHH;ITIH2;SERPIND1;SDC2;SERPINC1;SERPINA1;FSTL3;BMP15;FAM20C;KNG1;SERPINA10;ADAM10;FAM20A;TIMP1;CSF1;LGALS1;CST3;IL6;CHRDL1;FSTL1;FGF23;WNT7A;WNT3A;WNT11;WNT6;WNT9A;WNT9B;WNT5B;WNT16;WNT8A;WNT2B;WNT8B;WNT2;WNT4;WNT3;WNT10A;W…	NOTUM
Q02509	OC90	OC90 PLA2L	0.744525	No	secreted	NULL	extracellular matrix	GO:0031012	NULL	NULL	NULL	OC90
Q96LC7	SIGLEC10	SIGLEC10 SLG2 UNQ477/PRO940	0.744465	No	membrane&secreted	NULL	extracellular region	GO:0005576	NULL	NULL	ADIPOQ;IL4	SIGLEC10
P01911	HLA-DRB1	HLA-DRB1 HLA-DRB2	0.744404	No	membrane	isExome	extracellular exosome	GO:0070062	NULL	NULL	CTSS;CTSH;CTSC;CTSB;CTSO;CTSD;CTSE;CTSL;CTSK;CTSV;CTSF;CTSA;INS;TNF;S100A8;IL2;LTA;IL10;ANXA11;IL6;C1QA;IFNG;IL4;IL17A;C1QB	HLA-DRB1
Q71H61	ILDR2	ILDR2 C1orf32	0.744404	No	membrane&secreted	NULL	NULL	NULL	NULL	NULL	C1QTNF4	ILDR2
Q9H195	MUC3B	MUC3B	0.744283	No	NULL	NULL	NULL	NULL	IPR000082	NULL	NULL	MUC3B
Q9H251	CDH23	CDH23 KIAA1774 KIAA1812 UNQ1894/PRO4340	0.744121	No	membrane&secreted	isExome	NULL	NULL	NULL	NULL	COCH;IGFALS;COL11A2;SRPX2;ADAMTS9;WNT8A;ADAMTS20	CDH23
Q96FE5	LINGO1	LINGO1 LERN1 LRRN6A UNQ201/PRO227	0.743798	No	membrane&secreted	isExome	extracellular space|extracellular matrix	GO:0005615|GO:0031012	IPR003591;IPR000372	EFEMP2	NCAN;BDNF;NGF;NTF3;SEMA3A;NTF4;SEMA5B;SEMA4D;SEMA6A;SEMA3F;SEMA5A	LINGO1
P0DPA2	VSIG8	VSIG8 C1orf204	0.743697	No	membrane	NULL	NULL	NULL	NULL	NULL	NULL	VSIG8
P51805	PLXNA3	PLXNA3 PLXN4 SEX	0.743636	Yes	membrane	isExome	NULL	NULL	--	--	--	PLXNA3
P15260	IFNGR1	IFNGR1	0.743636	No	membrane&secreted	isExome	NULL	NULL	IPR003961	IFNG;IFNG	IFNG;IL10;IL4;IL6;IFNB1;IL2;IFNA1;IL12B;IFNA21;IL13;IFNA2;IFNA17;IL15;CSF2;IFNK;IL5;IFNE;IFNW1;IL7;IL3;IL22;IL9;LIF;IFNA13;EPO;IFNA6;IFNA14;IFNA10;IFNA5;CSF3;LEP;EGF;PRL;CNTF;IL23A;IL24;IL19;IFNA16;IFNA7;IL11;OSM;PDGFB;IL12A;IFNA4;IL17D;THPO;IL20;CTF1;PDGFA;IFNA8;CSH1;CSH2;GH1;TGFB1;TNF;IL26;CXCL10;IL17A;IL18;IL1B	IFNGR1
Q9BRK3	MXRA8	MXRA8	0.743616	No	membrane	isExome	extracellular exosome	GO:0070062	NULL	NULL	TNC;GAS6;FBN1;LAMB2;IGFBP5;IGFBP3;LTBP1;IGFBP4;FN1;SPARCL1;VWA1;CYR61;DMP1;IGFBP7;LAMB1;MFGE8;LAMC1;FGG;MATN3;VCAN;FGA;AMBN;SPP1;IGFBP1;MEPE;AMELX;HSPG2;COL3A1;COL1A1;OGN;EFEMP2;IBSP;MXRA5;FMOD;BGN;ABI3BP;DCN;COL6A1;LTBP2;LTBP3;OPTC;AEBP1;FSTL1;GPC3;FSTL3;FAM20C;LGALS1;CSF1;SDC2;CST3;FAM20A;TIMP1;CHRDL1;BMP4;ITIH2;KNG1;SERPIND1;FGF23;SERPINA1;ADAM10;SERPINA10;IL6;SERPINC1;BMP15;C1QL4;C1QL2;C1QC;M…	MXRA8
Q6ZNF0	ACP7	ACP7 PAPL PAPL1	0.743293	No	secreted	NULL	extracellular region	GO:0005576	NULL	NULL	NULL	ACP7
P55289	CDH12	CDH12	0.743152	No	membrane	NULL	NULL	NULL	NULL	NULL	NULL	CDH12
P51124	GZMM	GZMM MET1	0.742869	No	secreted	NULL	extracellular region	GO:0005576	NULL	NULL	NULL	GZMM
P19022	CDH2	CDH2 CDHN NCAD	0.742788	No	membrane	isExome	collagen-containing extracellular matrix	GO:0062023	NULL	FAM20C	FN1;VCAN;SPP1;CYR61;SLIT1;LAMB1;IGFBP3;TNC;LTBP1;IGFBP5;LAMC1;GAS6;FBN1;IGFBP1;IGFBP7;IGFBP4;MFGE8;SPARCL1;MATN3;FGA;FGG;AMELX;LAMB2;VWA1;AMBN;MEPE;DMP1;LTBP3;CTGF;VTN;SPARC;ACAN;RELN;ADAM10;BMP4;IL6;BDNF;TIMP1;SDC2;GPC3;FSTL1;FAM20C;CSF1;SERPINA1;CST3;KNG1;LGALS1;ITIH2;SERPIND1;BMP15;CHRDL1;SERPINC1;FAM20A;SERPINA10;FSTL3;FGF23;MMP9;EGF;FGF2;WNT5A;MMP2;BMP2;WNT3A;WNT2;VEGFA;TGFB1;S100A4;HGF;SHH;…	CDH2
Q8TC99	FNDC8	FNDC8	0.742485	Yes	intracellular	NULL	NULL	NULL	--	--	--	FNDC8
Q9HBB8	CDHR5	CDHR5 MUCDHL MUPCDH UNQ2781/PRO7168	0.742384	No	membrane&secreted	isExome	extracellular exosome	GO:0070062	NULL	NULL	MUC3A	CDHR5
P31785	IL2RG	IL2RG	0.742202	No	membrane	NULL	NULL	NULL	IPR003961	IL4;IL7;IL7	IL2;IL4;IL15;IL7;IL9;CSF2;IL5;IL3;HGF;FGF2;IL13;IFNG;IL10;OSM;IL6;CSF3;PRL;IL19;THPO;IFNA13;IFNA2;IFNA1;IFNB1;GH1;LEP;IL11;CTSS;EPO;IFNA21;IL24;IL17D;HMSD;EGF;IL12B;IL22;IFNA17;PDGFA;LIF;IFNA16;IL23A;IFNW1;IFNA7;IFNA8;IFNA10;IFNA14;CNTF;IL20;IFNE;PDGFB;IFNA6;CTF1;IFNA4;CSH2;IFNA5;IL12A;CSH1;IFNK;C1QB;IL16;TNF;CCL4;LTB	IL2RG
Q99519	NEU1	NEU1 NANH	0.742101	No	intracellular	isExome	extracellular region|extracellular exosome	GO:0005576|GO:0070062	NULL	NULL	LRG1;PRG3;ELN;CTSA;CTSZ;CTSD;ELANE;TIMP2;MMP8;HPSE;CXCL1;SLPI;SEMA4G	NEU1
P22223	CDH3	CDH3 CDHP	0.74204	No	membrane	isExome	NULL	NULL	NULL	NULL	FN1;ECM1;S100A4	CDH3
Q9UQ74	PSG8	PSG8	0.741859	No	secreted	NULL	extracellular region	GO:0005576	NULL	NULL	SDC2;SDC1;SDC3;GPC1;SDC4;TGFB1;MEGF8	PSG8
P01031	C5	C5 CPAMD4	0.741535	No	secreted	isExome	extracellular region|extracellular space|extracellular exosome	GO:0005576|GO:0005615|GO:0070062	IPR000020	NULL	VTN;F2;ELANE;CXCL8;KNG1;CCL5;CXCL1;CXCL10;CXCL2;AGT;CXCL9;CXCL12;CXCL13;CCL4;PPBP;CXCL3;CXCL11;CPN2;CCL21;ANXA1;CXCL5;CCL25;CCL1;CCL20;CCL16;CXCL6;CX3CL1;CCL28;CCL19;CCL4L1;INSL5;CCL13;PF4;CCL27;MBL2;SERPING1;ADAMTS13;ITIH3;SERPINC1	C5
O43278	SPINT1	SPINT1 HAI1 UNQ223/PRO256	0.741434	No	membrane&secreted	isExome	extracellular region|extracellular space|extracellular exosome|extracellular matrix organization	GO:0005576|GO:0005615|GO:0070062|GO:0030198	NULL	HGFAC;HGFAC	ST14;HGFAC;HGF;MST1;MMP14;PLAU;TMPRSS15	SPINT1
Q8IUA0	WFDC8	WFDC8 C20orf170 WAP8	0.741414	No	secreted	NULL	extracellular region	GO:0005576	NULL	NULL	HGFAC;SLPI	WFDC8
Q5Y7A7	HLA-DRB1	HLA-DRB1	0.741394	No	membrane	isExome	extracellular exosome	GO:0070062	NULL	NULL	CTSS;CTSH;CTSC;CTSB;CTSO;CTSD;CTSE;CTSL;CTSK;CTSV;CTSF;CTSA;INS;TNF;S100A8;IL2;LTA;IL10;ANXA11;IL6;C1QA;IFNG;IL4;IL17A;C1QB	HLA-DRB1
Q16557	PSG3	PSG3	0.741192	No	secreted	NULL	extracellular region	GO:0005576	NULL	NULL	FBLN1;SDC2;SDC1;GPC1;TGFB1;SDC3;SDC4;CSH1;PAPPA	PSG3
Q13046	PSG7	PSG7	0.741091	No	secreted	NULL	extracellular region	GO:0005576	NULL	NULL	SDC2;TGFB1;SDC3;SDC4;SDC1;GPC1	PSG7
P51671	CCL11	CCL11 SCYA11	0.740848	Yes	secreted	NULL	extracellular region|extracellular space	GO:0005576|GO:0005615	--	--	--	CCL11
Q08334	IL10RB	IL10RB CRFB4 D21S58 D21S66	0.740586	No	membrane	NULL	NULL	NULL	IPR003961	IL10;IL10;IL22;IL22	IL10;IL22;IL26;IL19;IL24;CTSS;IL6;IFNA2;IL4;IFNB1;IFNW1;IL2;IL13;IFNG;IFNK;IL5;IL9;IL15;IFNE;CSF2;IFNA21;IL11;IFNA1;IFNA17;IL7;IL20;IL23A;IL17D;LIF;IFNA13;IL3;CSF3;CTF1;CNTF;OSM;IFNA6;IFNA16;TNFSF4;EGF;IFNA5;IFNA10;IFNA4;LEP;IFNA14;IL12A;IL12B;IFNA7;IFNA8;PDGFB;PDGFA;EPO;THPO;CSH2;GH1;PRL;CSH1;IL17A;TNF;S100A7;CXCL8;IL17F;IL18	IL10RB
Q16820	MEP1B	MEP1B	0.740505	Yes	membrane	isExome	extracellular region	GO:0005576	--	--	--	MEP1B
Q86WS5	TMPRSS12	TMPRSS12	0.740465	No	membrane&secreted	NULL	NULL	NULL	NULL	NULL	HTRA4	TMPRSS12
O15041	SEMA3E	SEMA3E KIAA0331 SEMAH	0.740424	Yes	secreted	NULL	extracellular region|extracellular space	GO:0005576|GO:0005615	--	--	--	SEMA3E
O43157	PLXNB1	PLXNB1 KIAA0407 PLXN5 SEP	0.740404	Yes	membrane	isExome	extracellular region	GO:0005576	--	--	--	PLXNB1
Q6UWB4	PRSS55	PRSS55 TSP1 UNQ9391/PRO34284	0.740141	No	secreted	NULL	NULL	NULL	NULL	NULL	NULL	PRSS55
O94898	LRIG2	LRIG2 KIAA0806 LIG2	0.740121	No	membrane	NULL	extracellular space|extracellular matrix	GO:0005615|GO:0031012	IPR000483;IPR003591	NULL	HPSE2	LRIG2
Q96LA5	FCRL2	FCRL2 FCRH2 IFGP4 IRTA4 SPAP1 UNQ9236/PRO31998	0.739879	No	membrane	NULL	NULL	NULL	NULL	NULL	MUC1	FCRL2
Q9BZR6	RTN4R	RTN4R NOGOR UNQ330/PRO526	0.739778	No	membrane	isExome	extracellular exosome	GO:0070062	IPR000483;IPR003591	NULL	NCAN;BDNF;NGF;NTF3;SEMA3A;SEMA6B;SEMA3F;NTF4;SEMA5A;SEMA6C;SEMA3G;SEMA7A;SEMA5B;SEMA4G;ADAM22;PLXNA2;SEMA3B;SEMA4C;SEMA4B;SEMA3D	RTN4R
P13500	CCL2	CCL2 MCP1 SCYA2	0.739758	Yes	secreted	isExome	extracellular region|extracellular space	GO:0005576|GO:0005615	--	--	--	CCL2
Q9P244	LRFN1	LRFN1 KIAA1484 SALM2	0.739293	No	membrane	NULL	NULL	NULL	IPR000483;IPR003961;IPR003591	NULL	NTNG1;NTNG2;FN1;CLEC19A	LRFN1
O75581	LRP6	LRP6	0.738889	No	membrane	isExome	extracellular region	GO:0005576	NULL	IGFBP4;WNT3A;WNT3A	RSPO1;IGFBP4;CTGF;RSPO2;SPP1;RSPO3;RSPO4;EFEMP1;WISP1;BGLAP;EFEMP2;AGRN;WISP3;WNT1;WNT3A;WNT5A;WNT2;WNT8A;WNT4;WNT3;WNT9A;WNT7A;SFRP1;WNT8B;WIF1;SFRP2;WNT9B;WNT5B;WNT10B;SERPINF1;WNT7B;WNT2B;WNT11;WNT6;WNT10A;WNT16;FRZB;SERPINA4;SFRP5;SFRP4;TDGF1;TNFSF11;SEMA3C;SHH;BMP4;ELANE;BMP2;A2M	LRP6
O95393	BMP10	BMP10	0.738808	Yes	secreted	NULL	extracellular region|extracellular space	GO:0005576|GO:0005615	--	--	--	BMP10
P11215	ITGAM	ITGAM CD11B CR3A	0.738727	No	membrane	isExome	extracellular exosome|extracellular space|extracellular matrix organization	GO:0070062|GO:0005615|GO:0030198	IPR002035	CLEC4M;CLEC4M	FGG;CTGF;TGFBI;CYR61;SPON2;FGB;FGA;FN1;EMILIN1;SPP1;LAMC2;MMP9;IL13;CLEC12A;CLEC4C;CLEC5A;CLEC4D;MMP2;PLG;ADAM8;ADAM10;PLAU;SERPINB6;KNG1;PLAT;MMP25;F10;LPA;MST1;IL10;TNF;CSF2;IL17A;IL6;CSF3;IL4;CSF1;CCL2;IL15;CCL3;IL1B;CCL5;IL2;ELANE;CXCL1;CD209;IFNG;CXCL10;CXCL8;ANXA5;CCL4;FLT3LG;IL5;VEGFA;IL18;IL3;CXCL12;CXCL2;CXCL9;CLEC10A;CLEC7A;SDC1;CX3CL1;INS;CLEC9A;KITLG;IL7;CCL7;S100A9;LGALS3;CCL22;SERPI…	ITGAM
Q9NZU1	FLRT1	FLRT1 UNQ752/PRO1483	0.738343	No	membrane	NULL	extracellular space|extracellular matrix	GO:0005615|GO:0031012	IPR000483;IPR003961;IPR003591;IPR000372	NULL	NTN5;NID1;NTNG1;FGF10;FGF3;FGF1;FGF9;FGF6;FGF22;FGF2;FGF20;FGF4;FGF23	FLRT1
Q6EMK4	VASN	VASN SLITL2 UNQ314/PRO357/PRO1282	0.738283	No	membrane	isExome	extracellular space|extracellular exosome|extracellular matrix	GO:0005615|GO:0070062|GO:0031012	IPR000483;IPR003961;IPR003591;IPR000372	NULL	FN1;TGFB3;TGFB2;TGFB1	VASN
Q9P1W8	SIRPG	SIRPG SIRPB2	0.738202	No	membrane	NULL	NULL	NULL	NULL	NULL	NULL	SIRPG
Q8N441	FGFRL1	FGFRL1 FGFR5 FHFR UNQ480/PRO943	0.738061	No	membrane&secreted	isExome	NULL	NULL	NULL	NULL	SPON2;EPYC;FGF2;FGF10;FGF3;FGF22;FGF4;FGF18;FGF23;FGF12;FGF8;GPC6;FGF1;FGF13;GPC4;FGF6;FGF7;FGF19;FGF20;FGF11;FGF21;FGF17;FGF16;FGF9;FGF5	FGFRL1
Q00889	PSG6	PSG6 CGM3 PSG10 PSG12 PSGGB	0.737737	No	secreted	NULL	extracellular region	GO:0005576	NULL	NULL	SDC2;TGFB1;SDC1;GPC1;SDC4;SDC3	PSG6
Q96PJ5	FCRL4	FCRL4 FCRH4 IFGP2 IRTA1	0.737495	No	membrane	NULL	NULL	NULL	NULL	NULL	MUC15;ITIH4;MUC1	FCRL4
O75054	IGSF3	IGSF3 EWI3 KIAA0466	0.737495	No	membrane	isExome	NULL	NULL	NULL	NULL	NULL	IGSF3
P98172	EFNB1	EFNB1 EFL3 EPLG2 LERK2	0.737455	No	membrane	isExome	extracellular exosome	GO:0070062	NULL	NULL	NTN1;SLIT3;FN1;SLIT1;RELN;SLIT2;MMP2;MMP9;SEMA3F;SEMA3B;SEMA4G;SEMA3C;SEMA5B;SEMA6B;SEMA4B;SEMA6D;SEMA4C;SEMA3G;SEMA6C;SEMA3E;SEMA3D;SEMA4D;SEMA7A;SEMA5A;SEMA4A;SEMA6A;SEMA3A;SEMA4F;PLXNA1;PLXNB1;PLXNA4;PLXND1;PLXNB2;PLXNA3;PLXNA2;PLXNC1;PLXNB3;BDNF;ADAM17;CCL2;VEGFA;NTF3;NGF;SHH;NTF4;EPO;WNT3;ADAM10	EFNB1
A4D1T9	PRSS37	PRSS37 TRYX2	0.737434	No	secreted	NULL	extracellular region	GO:0005576	NULL	NULL	ADAM2	PRSS37
Q9Y5I0	PCDHA13	PCDHA13 CNRS5	0.737232	No	membrane	NULL	NULL	NULL	NULL	NULL	NULL	PCDHA13
Q8NFP4	MDGA1	MDGA1 MAMDC3	0.737111	No	secreted	NULL	extracellular space|extracellular region	GO:0005615|GO:0005576	IPR003961	NULL	NTNG1;NTNG2;TECTA;TECTB;FN1;NTN5;CD109	MDGA1
Q6UWY2	PRSS57	PRSS57 PRSSL1 UNQ782/PRO1599	0.736949	No	secreted	NULL	extracellular space	GO:0005615	NULL	NULL	ELANE;CTSG;CTSC	PRSS57
Q9H3Y0	R3HDML	R3HDML	0.736949	No	secreted	NULL	extracellular space	GO:0005615	NULL	NULL	OPTC	R3HDML
Q2TAL6	VWC2	VWC2 UNQ739/PRO1434	0.736808	Yes	secreted	NULL	extracellular space	GO:0005615	--	--	--	VWC2
Q00888	PSG4	PSG4 CGM4 PSG9	0.736646	No	secreted	NULL	extracellular region	GO:0005576	NULL	NULL	SDC2;SDC1;TGFB1;SDC4;GPC1;SDC3;CSH1	PSG4
Q9Y5G0	PCDHGB5	PCDHGB5	0.736586	No	membrane	isExome	extracellular exosome	GO:0070062	NULL	NULL	LAMC3;ADAM11;ITIH5	PCDHGB5
P43632	KIR2DS4	KIR2DS4 CD158I KKA3 NKAT8	0.736485	No	NULL	NULL	NULL	NULL	NULL	NULL	NULL	KIR2DS4
P61550	ERVS71-1	ERVS71-1	0.736384	No	NULL	NULL	NULL	NULL	NULL	NULL	NULL	ERVS71-1
Q9Y286	SIGLEC7	SIGLEC7 AIRM1	0.73602	No	membrane&secreted	NULL	NULL	NULL	NULL	NULL	CLEC10A;CLEC12A	SIGLEC7
Q8IXH8	CDH26	CDH26	0.735394	No	membrane	NULL	NULL	NULL	NULL	NULL	BMPER;CCL26	CDH26
P01374	LTA	LTA TNFB TNFSF1	0.735394	Yes	secreted	NULL	extracellular space	GO:0005615	--	--	--	LTA
Q9Y5F3	PCDHB1	PCDHB1	0.735313	No	membrane	NULL	NULL	NULL	NULL	NULL	NULL	PCDHB1
O95206	PCDH8	PCDH8	0.735111	No	membrane	NULL	NULL	NULL	NULL	NULL	REG3A	PCDH8
Q9UN71	PCDHGB4	PCDHGB4 CDH20 FIB2	0.735091	No	membrane	NULL	NULL	NULL	NULL	NULL	SHH	PCDHGB4
P01859	IGHG2	IGHG2	0.734808	No	NULL	isExome	extracellular region|extracellular space|extracellular exosome	GO:0005576|GO:0005615|GO:0070062	NULL	NULL	NULL	IGHG2
P16871	IL7R	IL7R	0.734788	No	membrane&secreted	NULL	extracellular region	GO:0005576	IPR003961	IL7;IL7;IL7;IL7;IL7;IL7;IL7;IL7;IL7;IL7	IL7;IL2;IL15;IL4;EGF;WNT5A;IL6;IL10;IL5;IL13;IFNG;IL9;CSF2;IL3;IL22;CSF3;CCL19;IL23A;IL17A;TNF;IL24;OSM;IFNA1;IFNB1;THPO;EPO;IL11;LEP;CCL27;IFNA2;IFNA5;CSH2;CSH1;GH1;CNTF;PRL;IL19;IL12A;LIF;IFNA17;IFNA21;PDGFA;CTF1;IFNK;IFNA8;IFNA14;IFNA13;IL17D;PDGFB;IFNE;IFNA10;IL20;IL12B;IFNA7;IFNA16;IFNA4;IFNA6;IFNW1;ANXA5;XCL1;CCL5;IL1RN;IL1B;CCL18;CCL2;PCSK5;TNFSF4;XCL2;FLT3LG;CXCL8;IL18;CXCL10;CCL22;CCL17;…	IL7R
Q8TCW7	ZPLD1	ZPLD1	0.734727	Yes	membrane	NULL	extracellular region	GO:0005576	--	--	--	ZPLD1
Q5TFQ8	SIRPB1	SIRPB1	0.734707	No	membrane&secreted	isExome	NULL	NULL	NULL	NULL	CLEC5A;IFNB1	SIRPB1
Q12918	KLRB1	KLRB1 CLEC5B NKRP1A	0.734384	No	membrane	NULL	NULL	NULL	IPR001304	CLEC2D;CLEC2D	CILP;CLEC2D;CLEC2A;IL17A;IL2;TNF;IL4;IL15;IL22;IL17F;IFNG;IL13;IL10;IL7;IL18;IL6;IL5;CCL20;IL26;CCL5;CSF2;TNFSF15;CCL16;CCL27	KLRB1
Q9NT99	LRRC4B	LRRC4B LRIG4	0.734242	No	membrane&secreted	NULL	NULL	NULL	IPR000483;IPR003591;IPR000372	NULL	NTNG1;NTNG2;HAPLN2;CBLN1	LRRC4B
Q14213	EBI3	EBI3 IL27B	0.733919	Yes	secreted	NULL	extracellular region|extracellular space	GO:0005576|GO:0005615	--	--	--	EBI3
Q96DT0	LGALS12	LGALS12 GRIP1	0.733677	Yes	intracellular	NULL	NULL	NULL	--	--	--	LGALS12
Q9H9P2	CHODL	CHODL C21orf68 PRED12 UNQ872/PRO1890	0.733576	No	membrane	NULL	NULL	NULL	IPR001304	NULL	NULL	CHODL
P52798	EFNA4	EFNA4 EPLG4 LERK4	0.733535	No	membrane&secreted	NULL	extracellular region	GO:0005576	NULL	NULL	NTN1;SLIT3;SLIT1;SLIT2;FN1;RELN;ADAM10;SEMA4G;SEMA5B;SEMA6B;SEMA4C;SEMA4B;SEMA3G;SEMA6D;SEMA3F;SEMA3E;SEMA3D;SEMA6C;SEMA4A;SEMA5A;SEMA3C;SEMA3B;SEMA4D;SEMA7A;SEMA6A;SEMA3A;SEMA4F;FREM1;PLXNA4;PLXNA1;PLXNB1;PLXNA3;PLXND1;PLXNA2;PLXNB3;PLXNB2;PLXNC1;CLEC11A;BDNF;NTF3;VEGFA;NGF;NTF4;EPO;SHH	EFNA4
P18754	RCC1	RCC1 CHC1	0.733253	No	intracellular	isExome	NULL	NULL	NULL	FN1;CRELD2	RSPO1	RCC1
Q9BZW8	CD244	CD244 2B4	0.733192	No	membrane	NULL	NULL	NULL	NULL	NULL	IL2;LGALS9;IL15;TNF;CLEC12A;CLEC4G;CLEC1B	CD244
Q29974	HLA-DRB1	HLA-DRB1	0.73303	No	membrane	isExome	extracellular exosome	GO:0070062	NULL	NULL	CTSS;CTSH;CTSC;CTSB;CTSO;CTSD;CTSE;CTSL;CTSK;CTSV;CTSF;CTSA;INS;TNF;S100A8;IL2;LTA;IL10;ANXA11;IL6;C1QA;IFNG;IL4;IL17A;C1QB	HLA-DRB1
Q969P0	IGSF8	IGSF8 CD81P3 EWI2 KCT4	0.732566	No	membrane&secreted	isExome	extracellular exosome	GO:0070062	NULL	NULL	ZP3;POMZP3;LGI1;COL14A1;ADAM15;ADAM10	IGSF8
P0CG37	CFC1	CFC1	0.732364	Yes	secreted	NULL	extracellular region	GO:0005576	--	--	--	CFC1
Q6IE37	OVOS1	OVOS1	0.732283	No	NULL	NULL	extracellular space	GO:0005615	NULL	NULL	NULL	OVOS1
Q30167	HLA-DRB1	HLA-DRB1	0.732222	No	membrane	isExome	extracellular exosome	GO:0070062	NULL	NULL	CTSS;CTSH;CTSC;CTSB;CTSO;CTSD;CTSE;CTSL;CTSK;CTSV;CTSF;CTSA;INS;TNF;S100A8;IL2;LTA;IL10;ANXA11;IL6;C1QA;IFNG;IL4;IL17A;C1QB	HLA-DRB1
Q07108	CD69	CD69 CLEC2C	0.732182	No	membrane	NULL	NULL	NULL	IPR001304	NULL	IL2;IL15;IL10;IL7;CSF2;TNF;IL4;IL18;IL17A;IFNG;IL6;ANXA5;IL5;IL3;IL9;IL13;CXCL10;CCL5;FASLG;CXCL8;SDC1;CCL4;CCL3;CXCL9;SERPINB2;CCL2;SERPINB7;SERPINB8;LEP;CCL19;SERPINB5;CCL21;IL1B;TNFSF13B;S100B;CXCL13;TNFSF4;PCSK5;LTA;CXCL12;CLEC1B;IFNA1;TNFSF9	CD69
Q8N3J6	CADM2	CADM2 IGSF4D NECL3	0.732182	No	membrane	NULL	NULL	NULL	NULL	NULL	COLEC10	CADM2
Q14392	LRRC32	LRRC32 D11S833E GARP	0.732162	No	membrane&secreted	isExome	extracellular space|extracellular matrix	GO:0005615|GO:0031012	IPR003591;IPR000372	TGFB1	IL2;TGFB1	LRRC32
A6NI73	LILRA5	LILRA5 ILT11 LILRB7 LIR9	0.731919	No	membrane	NULL	extracellular region	GO:0005576	NULL	NULL	SERPINB8	LILRA5
Q14574	DSC3	DSC3 CDHF3 DSC4	0.731717	No	membrane	isExome	extracellular region	GO:0005576	NULL	NULL	COL17A1;FLG;TCHH;TGM1;RPTN;CSTA;PI3;CELA2A	DSC3
Q9Y5F9	PCDHGB6	PCDHGB6	0.731535	No	membrane	NULL	NULL	NULL	NULL	NULL	NULL	PCDHGB6
Q9NP95	FGF20	FGF20	0.731455	Yes	intracellular	NULL	extracellular region	GO:0005576	--	--	--	FGF20
O76036	NCR1	NCR1 LY94	0.731273	No	membrane	NULL	NULL	NULL	NULL	NULL	MFAP4;IL15;IL2;CCL27;IL18;IL17A;TNF;IL10;IFNG;IL7;FASLG;CSF2;IL22;IL13;INS;IL5;IL4;IL6;CCL5;TNFSF10;CXCL10;TNFSF9	NCR1
P01854	IGHE	IGHE	0.731273	No	NULL	NULL	extracellular region	GO:0005576	NULL	NULL	NULL	IGHE
P06731	CEACAM5	CEACAM5 CEA	0.731253	No	secreted	isExome	extracellular region|extracellular exosome	GO:0005576|GO:0070062	NULL	NULL	TECTB;TECTA;NTNG2;NTNG1;FN1;IGFBP7;CD109;MUC1;CD209;IFNG;VEGFA;MUC5AC;SERPINA1;F2;IL2;GPC3;MUC16;CSF2;MUC6;IL6;EGF;CSH1;CSH2;INS;CLEC2A	CEACAM5
Q9UK55	SERPINA10	SERPINA10 ZPI UNQ707/PRO1358	0.731212	Yes	membrane&secreted	NULL	extracellular space|extracellular exosome	GO:0005615|GO:0070062	--	--	--	SERPINA10
Q68DV7	RNF43	RNF43	0.731152	No	membrane	NULL	NULL	NULL	NULL	NULL	RSPO1;RSPO2;RSPO3;RSPO4;WNT3A;MUC6	RNF43
Q9NQT6	FSCN3	FSCN3	0.730929	No	intracellular	NULL	NULL	NULL	NULL	NULL	ELSPBP1	FSCN3
Q8N967	LRTM2	LRTM2	0.730727	No	membrane&secreted	NULL	NULL	NULL	IPR000483;IPR003591;IPR000372	NULL	HAPLN2;CSPG5	LRTM2
Q5DID0	UMODL1	UMODL1	0.730687	No	membrane	NULL	extracellular space	GO:0005615	IPR001881;IPR011489;IPR003961;IPR000082;IPR001507	NULL	NULL	UMODL1
P07288	KLK3	KLK3 APS	0.730646	No	secreted	NULL	extracellular region|extracellular space|extracellular exosome	GO:0005576|GO:0005615|GO:0070062	NULL	FN1;SERPINA3;A2M	IGFBP3;IGFALS;FN1;IGF1;IGF2;A2M;IL6;EGF;MUC1;SERPINA5;TGM4;SERPINA1;VEGFA;INS;IL4;SLPI;NGF;CSF2;KNG1;PZP;PRL;PLG;IL2;MMP9;CXCL8;MMP2;CSTA;GDF15;ITIH3	KLK3
Q9Y5I2	PCDHA10	PCDHA10 CNRS8	0.730364	No	membrane&secreted	NULL	extracellular region	GO:0005576	NULL	NULL	NULL	PCDHA10
O00462	MANBA	MANBA MANB1	0.730323	No	secreted	NULL	NULL	NULL	NULL	NULL	GH2;HPX;CTSC	MANBA
P26992	CNTFR	CNTFR	0.730303	No	membrane&secreted	isExome	NULL	NULL	IPR003961	CNTF;CNTF	CNTF;CLCF1;CRLF1;LIF;CTF1;OSM;IL11;IL6;LEP;IL3;IL22;IL10;IL13;CSF3;IFNG;EGF;IL12B;IL17D;PDGFA;THPO;PDGFB;IL15;CSF2;IL5;IL23A;IL7;IL12A;IL4;IFNA21;EPO;IL2;CSH1;PRL;IFNA5;IL9;IL19;IFNA17;GH1;IFNA6;IFNA7;IFNA1;IL20;IL24;IFNA14;IFNA16;CSH2;IFNA13;IFNE;IFNA10;IFNA2;IFNA8;IFNW1;IFNK;IFNA4;IFNB1;GDNF;BDNF	CNTFR
P40199	CEACAM6	CEACAM6 NCA	0.730222	No	membrane	NULL	extracellular space	GO:0005615	NULL	NULL	FN1;S100A8;MUC1;MUC5B;MUC13	CEACAM6
P32927	CSF2RB	CSF2RB IL3RB IL5RB	0.730141	No	membrane	NULL	NULL	NULL	IPR003961	CSF2;IL5;IL3	FGL2;SRGN;CSF2;IL3;IL5;SFTPB;SFTPC;SFTPD;SFTPA1;IL2;SFTPA2;SFTA3;EPO;OSM;CSF3;IL15;IL6;IL4;PDGFB;IL10;IFNA13;IL9;IFNA21;IL7;IL13;IFNG;IFNA2;IL24;IFNA17;THPO;IFNA16;IFNA7;IFNA10;IFNA1;IL11;IFNA14;IFNA8;IFNB1;IFNK;IL19;PRL;EGF;IFNA6;C1QB;IL23A;IFNA4;IL12B;LEP;CNTF;PDGFA;IL17D;LIF;IL20;IL22;CTF1;IFNE;IFNW1;CSH2;IL12A;IFNA5;CSH1;GH1;CTSS;COLEC12;C1QA;C1QC;CCL4;IL1RN	CSF2RB
Q9Y5G2	PCDHGB2	PCDHGB2	0.730081	No	membrane	NULL	NULL	NULL	NULL	NULL	NULL	PCDHGB2
Q9GIY3	HLA-DRB1	HLA-DRB1	0.73002	No	membrane	isExome	extracellular exosome	GO:0070062	NULL	NULL	CTSS;CTSH;CTSC;CTSB;CTSO;CTSD;CTSE;CTSL;CTSK;CTSV;CTSF;CTSA;INS;TNF;S100A8;IL2;LTA;IL10;ANXA11;IL6;C1QA;IFNG;IL4;IL17A;C1QB	HLA-DRB1
Q04609	FOLH1	FOLH1 FOLH NAALAD1 PSM PSMA GIG27	0.729798	No	membrane	isExome	extracellular exosome	GO:0070062	NULL	NULL	DPT;MUC1;VEGFA;CSF2;F2;IL2	FOLH1
Q7Z553	MDGA2	MDGA2 MAMDC1 UNQ8188/PRO23197	0.729455	No	membrane	NULL	extracellular region	GO:0005576	IPR003961	NULL	TECTA;NTNG1;NTNG2;TECTB;FN1;CD109	MDGA2
O43300	LRRTM2	LRRTM2 KIAA0416 LRRN2	0.728424	No	membrane&secreted	NULL	NULL	NULL	IPR003591	NULL	NTNG1;SEMA6D;CBLN1;GPC1	LRRTM2
Q6UXN2	TREML4	TREML4 TLT4 UNQ9425/PRO34675	0.728424	No	membrane	NULL	extracellular region	GO:0005576	NULL	NULL	CLEC9A;CLEC5A	TREML4
P34810	CD68	CD68	0.728141	No	membrane&secreted	isExome	NULL	NULL	NULL	NULL	VWF;ADIPOQ;FN1;SPP1;ELN;COL1A1;IL6;CCL2;IL10;TNF;EDA;S100A9;IL1B;MMP9;IL4;CXCL8;CSF1;VEGFA;TNFSF13;INS;LGALS3;CD209;CCL5;CCL3;IL13;CSF2;CXCL10;SDC1;IL17A;IL18;IFNG;ELANE;TIMP1;IL2;SERPINA1;TNFSF13B;CXCL12;LEP;CXCL1;CX3CL1;IL1RN;MMP2;CCL4;CCL7;CTSK;MMP3;CXCL9;MMP12;CLEC4C;CCL18;TGFB1;CCL22;CTSD;CTSB;MMP1;CXCL2;CLEC5A;CTSS;FGF2;SERPINE1;C1QB;CLEC4D;CSF3;CLEC10A;CCL17;TNFSF11;IL5;CXCL13;EGF;CLEC12B;…	CD68
Q8IW75	SERPINA12	SERPINA12	0.728081	Yes	secreted	NULL	extracellular space	GO:0005615	--	--	--	SERPINA12
Q95IE3	HLA-DRB1	HLA-DRB1	0.728061	No	membrane	isExome	extracellular exosome	GO:0070062	NULL	NULL	CTSS;CTSH;CTSC;CTSB;CTSO;CTSD;CTSE;CTSL;CTSK;CTSV;CTSF;CTSA;INS;TNF;S100A8;IL2;LTA;IL10;ANXA11;IL6;C1QA;IFNG;IL4;IL17A;C1QB	HLA-DRB1
Q8WUJ1	CYB5D2	CYB5D2	0.727717	No	secreted	NULL	extracellular region	GO:0005576	NULL	NULL	NULL	CYB5D2
P48307	TFPI2	TFPI2	0.727414	No	secreted	NULL	extracellular space|extracellular matrix|extracellular matrix structural constituent	GO:0005615|GO:0031012|GO:0005201	NULL	NULL	VWF;IGFBP1;FN1;PLG;F2;SERPINE1;PLAT;MMP1;BMP3;SFRP1;CSH1;MMP2;ADAMTS1;PAPPA;PLAU;CSH2;SFRP2;SERPINC1	TFPI2
Q8NFZ4	NLGN2	NLGN2 KIAA1366	0.727313	No	membrane	NULL	NULL	NULL	NULL	NULL	LAMA1;NTNG1;AGRN;CBLN1;FGF22;BDNF;EGF	NLGN2
Q9Y5I4	PCDHAC2	PCDHAC2	0.727232	No	membrane	NULL	NULL	NULL	NULL	NULL	NULL	PCDHAC2
Q9UN72	PCDHA7	PCDHA7 CNRS4	0.727111	No	membrane	NULL	NULL	NULL	NULL	NULL	TCHHL1	PCDHA7
Q6NVV9	ADAM5	ADAM5 ADAM5P TMDC2	0.72703	No	NULL	NULL	NULL	NULL	NULL	NULL	NULL	ADAM5
Q15303	ERBB4	ERBB4 HER4	0.72701	No	membrane	isExome	extracellular region	GO:0005576	NULL	NULL	DCN;AGRN;CTGF;HSPG2;RELN;NRG1;HBEGF;NRG2;NRG3;BTC;EREG;NRG4;ADAM17;EGF;PRL;TGFA;AREG;FGF2;VEGFA;INS;IGF1;BDNF;HGF;PDGFB;NGF;FGF1;PDGFA;FGF9;IGF2;VEGFB;FGF10;VEGFC;KITLG;NTF3;FGF17;FGF3;FIGF;ANGPT1;PGF;FGF7;FGF16;NTF4;CSF1;FGF8;FGF18;FGF20;FGF19;FGF4;PDGFD;FGF6;PDGFC;FGF22;FGF21;EPGN;FGF5;ANGPT2;FGF23;ANGPT4;FLT3LG;WNT1;MUC1;BMP2;SHH;FREM2;ADAM10;PI3;BMP4;WNT9A;WNT2;IHH;WNT9B;WNT5A	ERBB4
Q9NS62	THSD1	THSD1 TMTSP UNQ3010/PRO9769	0.72699	No	membrane	isExome	extracellular region	GO:0005576	IPR000884	NULL	THSD4;SPON2;THBS1;THBS2;SPON1;SBSPON;VWCE;PAPLN;VWA3A;ADAMTSL3;ADAMTS5;ADAMTSL1;ADAMTSL4;ADAMTS15;ADAMTS9;ADAMTS1;ADAMTS7;ADAMTS6;ADAMTS17;SEMA5B;ADAMTS18;ADAMTS14;ADAMTSL5;ADAMTS10;ADAMTS8;ADAMTS13;ADAMTS19;SEMA5A;ADAMTS2;ADAMTS12;ADAMTS16;ADAMTS3;ADAMTS4;ADAMTSL2;ADAMTS20	THSD1
P01594	IGKV1-33	IGKV1-33	0.726949	No	NULL	NULL	extracellular region|extracellular space	GO:0005576|GO:0005615	NULL	NULL	NULL	IGKV1-33
Q14952	KIR2DS3	KIR2DS3 NKAT7	0.726727	No	NULL	NULL	NULL	NULL	NULL	NULL	NULL	KIR2DS3
O15399	GRIN2D	GRIN2D GluN2D NMDAR2D	0.726667	No	membrane	NULL	NULL	NULL	NULL	NULL	NTN5;VWC2;BDNF	GRIN2D
P01880	IGHD	IGHD	0.726465	No	NULL	NULL	extracellular exosome	GO:0070062	NULL	NULL	NULL	IGHD
P01861	IGHG4	IGHG4	0.726384	No	NULL	isExome	extracellular region|extracellular space|extracellular exosome	GO:0005576|GO:0005615|GO:0070062	NULL	NULL	NULL	IGHG4
P01593	IGKV1D-33	IGKV1D-33	0.726343	No	NULL	NULL	extracellular region|extracellular space|extracellular exosome	GO:0005576|GO:0005615|GO:0070062	NULL	NULL	NULL	IGKV1D-33
Q15223	NECTIN1	NECTIN1 HVEC PRR1 PVRL1	0.726323	No	membrane&secreted	NULL	extracellular region	GO:0005576	NULL	NULL	NULL	NECTIN1
Q9Y5H5	PCDHA9	PCDHA9 KIAA0345	0.726263	No	membrane	NULL	NULL	NULL	NULL	NULL	TCHHL1	PCDHA9
O95390	GDF11	GDF11 BMP11	0.726242	Yes	secreted	isExome	extracellular space	GO:0005615	--	--	--	GDF11
P20848	SERPINA2	SERPINA2 ARGS ATR PIL SERPINA2P	0.726202	Yes	NULL	NULL	extracellular space	GO:0005615	--	--	--	SERPINA2
Q6UXN8	CLEC9A	CLEC9A UNQ9341/PRO34046	0.725576	Yes	membrane	NULL	NULL	NULL	--	--	--	CLEC9A
P23229	ITGA6	ITGA6	0.725414	No	membrane	isExome	cellular response to extracellular stimulus|extracellular matrix organization	GO:0031668|GO:0030198	NULL	NULL	LAMA5;LAMA3;COL17A1;LAMC2;LAMA1;LAMA4;LAMA2;LAMB3;LAMC1;THBS1;LAMB1;THBS2;LAMB2;AGRN;VTN;COL4A1;COL4A2;COL6A1;COL1A1;LAMC3;COL2A1;THBS4;COL6A2;SPP1;VWF;COL1A2;COL4A4;COL9A1;THBS3;COMP;COL4A6;TNC;TNR;TNN;COL4A5;COL9A3;COL6A3;RELN;COL6A6;TNFAIP6;IBSP;LAMB4;COL4A3;CHAD;TNXB;COL9A2;COL6A5;FN1;NPNT;COL7A1;EGF;SDC1;MDK;IL1B;FGF2;INS;ADAM9;PCSK5;MUC1;HYAL4;FRZB	ITGA6
Q9NRE1	MMP26	MMP26	0.725374	Yes	secreted	NULL	extracellular space|extracellular matrix organization|extracellular matrix	GO:0005615|GO:0030198|GO:0031012	--	--	--	MMP26
Q86TI2	DPP9	DPP9 DPRP2	0.725192	No	intracellular	NULL	NULL	NULL	NULL	NULL	MUC5B	DPP9
Q96ID5	IGSF21	IGSF21	0.725152	No	secreted	NULL	NULL	NULL	NULL	S100A8;ANXA3;SERPINB9	BCAN;ELFN2	IGSF21
A8MWY0	KIAA1324L	KIAA1324L EIG121L	0.724606	No	membrane	NULL	NULL	NULL	NULL	NULL	CRISPLD1;COL28A1	KIAA1324L
P30405	PPIF	PPIF CYP3	0.724586	No	intracellular	NULL	NULL	NULL	NULL	NULL	LAMA2;COL6A1;COCH;S100A10	PPIF
Q8IUX7	AEBP1	AEBP1 ACLP	0.724545	Yes	secreted	isExome	collagen-containing extracellular matrix|extracellular region|extracellular matrix structural constituent|extracellular space|extracellular exosome	GO:0062023|GO:0005576|GO:0005201|GO:0005615|GO:0070062	--	--	--	AEBP1
Q9NYK1	TLR7	TLR7 UNQ248/PRO285	0.724485	No	membrane	NULL	NULL	NULL	IPR000483;IPR003591	NULL	FN1;CTSS;CTSB;CTSK;CTSL;IL6;IL10;TNF;CLEC4C;CXCL8;IL18;CLEC7A;IFNB1;IL4;IL17A;IL1B;CCL5;CXCL10;TNFSF13B;CD209;CCL2;CSF2;IL3;IL2;IFNA1;IL13;C1QB;IL15;CCL4;IFNG;CCL3;CXCL1;CLEC4E;CXCL2;IL5;CLEC6A;FSTL1;C1QA;CXCL9;CLEC9A;INS;CLEC4A;IFNA2;CLEC10A;VEGFA;CSF1;MBL2;CSF3;FLT3LG;IFNA21;CCL11;IFNA17;IL1RN;CCL20;IL7;C1QC;ITIH4;CXCL5;CLEC2B;IL23A;CXCL12;TNFSF4;CCL19;MMP9;TNFSF10;CLEC3A;CCL21;CCL8;FASLG;IL17F…	TLR7
Q8WZ75	ROBO4	ROBO4 UNQ421/PRO3674	0.724303	No	membrane	NULL	extracellular exosome	GO:0070062	IPR003961	NULL	SLIT2;SLIT3;SLIT1;NTN1;FN1;VWF;NYX;CLEC14A;EMCN;VEGFA;EGFL7;MEGF8	ROBO4
Q8TAG5	VSTM2A	VSTM2A VSTM2	0.723798	No	secreted	NULL	extracellular region	GO:0005576	NULL	NULL	NULL	VSTM2A
A6H8M9	CDHR4	CDHR4 CDH29 UNQ9392/PRO34300	0.723414	No	membrane&secreted	NULL	NULL	NULL	NULL	NULL	NULL	CDHR4
Q68CZ2	TNS3	TNS3 TEM6 TENS1 TPP	0.723354	No	intracellular	isExome	NULL	NULL	NULL	NULL	ESM1;DSPP;HGF;EGF;PLXDC1;EGFL6	TNS3
P06312	IGKV4-1	IGKV4-1	0.723131	No	NULL	isExome	extracellular region|extracellular space	GO:0005576|GO:0005615	NULL	NULL	NULL	IGKV4-1
Q9Y5E6	PCDHB3	PCDHB3	0.72301	No	membrane	NULL	NULL	NULL	NULL	NULL	NULL	PCDHB3
Q9BTN0	LRFN3	LRFN3 SALM4 UNQ5865/PRO34192	0.722808	No	membrane	NULL	NULL	NULL	IPR000483;IPR003961;IPR003591	NULL	NTNG1;NTNG2	LRFN3
P24071	FCAR	FCAR CD89	0.722687	No	membrane&secreted	NULL	extracellular region	GO:0005576	NULL	NULL	CLEC4D;CLEC4C;CLEC5A;CLEC12A;ADAM10;ADAM8;SERPINB6;MMP25;PLAU;CD209;OVGP1	FCAR
Q8IVU1	IGDCC3	IGDCC3 PUNC	0.722667	No	membrane	NULL	NULL	NULL	IPR003961	NULL	NYX;SLIT3;SLIT2;SLIT1;FN1;NTNG1;NTN1;NTN5;NTN3;NTNG2	IGDCC3
Q8NHJ6	LILRB4	LILRB4 ILT3 LIR5	0.722343	No	membrane	NULL	extracellular exosome	GO:0070062	NULL	NULL	IL10;CLEC4C;CD209;CLEC4A	LILRB4
P22304	IDS	IDS SIDS	0.722303	No	secreted	NULL	NULL	NULL	NULL	NULL	HPSE;HYAL1;HPSE2;SPAM1;F9;GREM1	IDS
Q8WUT4	LRRN4	LRRN4 C20orf75	0.722202	No	membrane	NULL	extracellular exosome	GO:0070062	IPR003961;IPR003591	NULL	FAM20B	LRRN4
Q9Y6N8	CDH10	CDH10	0.722162	No	membrane	NULL	NULL	NULL	NULL	PTN	SEMA5A	CDH10
Q16610	ECM1	ECM1	0.722101	Yes	secreted	isExome	collagen-containing extracellular matrix|extracellular region|extracellular exosome|extracellular matrix|extracellular matrix structural constituent	GO:0062023|GO:0005576|GO:0070062|GO:0031012|GO:0005201	--	--	--	ECM1
P19235	EPOR	EPOR	0.721939	No	membrane	NULL	extracellular region	GO:0005576	IPR003961	EPO;EPO;EPO;EPO;EPO	EPO;KITLG;IL3;THPO;CSF2;CSF3;IL6;IL2;PRL;EGF;IL5;OSM;IL7;VEGFA;IL11;LEP;IL4;IL9;CNTF;IL10;IFNG;IFNA1;LIF;IL15;PDGFB;CSH2;IL13;CTF1;CSH1;IL19;IL22;IL24;IFNA4;IL23A;IL20;GH1;IFNA6;IFNE;IFNA5;IFNA14;IL12A;IFNA10;IFNA7;IFNK;IFNA2;IFNA17;IFNA21;IFNA13;IFNA8;IFNW1;IFNB1;IFNA16;IL12B;PDGFA;IL17D;INS;TNF;EGLN3;EGLN1;PI3	EPOR
P13385	TDGF1	TDGF1 CRIPTO	0.721475	Yes	intracellular	NULL	extracellular region|extracellular space	GO:0005576|GO:0005615	--	--	--	TDGF1
Q14002	CEACAM7	CEACAM7 CGM2	0.721475	No	membrane&secreted	NULL	extracellular region	GO:0005576	NULL	NULL	TECTB;TECTA;NTNG2;NTNG1;CD109	CEACAM7
Q8IZU9	KIRREL3	KIRREL3 KIAA1867 NEPH2 UNQ5923/PRO4502/PRO19814	0.721455	No	membrane	NULL	extracellular region	GO:0005576	NULL	NULL	PLXNA3;PAMR1	KIRREL3
Q12864	CDH17	CDH17	0.721273	No	membrane&secreted	isExome	NULL	NULL	NULL	NULL	FN1;LTBP3;VWF;VTN;COL13A1;SRPX2;NTN1;EGF;VEGFA;MMP9;MMP2;INS;HGF;FGF2;ADAM10;WNT3A;WNT1;WNT5A;TNF;MMP7;SHH;CSPG4	CDH17
Q9Y5F1	PCDHB12	PCDHB12	0.72101	No	membrane&secreted	NULL	NULL	NULL	NULL	NULL	ADAM23;SERPINA11	PCDHB12
O60320	FAM189A1	FAM189A1 KIAA0574 TMEM228	0.720465	No	membrane&secreted	NULL	NULL	NULL	NULL	NULL	COL6A3	FAM189A1
Q9NS68	TNFRSF19	TNFRSF19 TAJ TROY UNQ1888/PRO4333	0.720061	No	membrane	NULL	NULL	NULL	NULL	NULL	NULL	TNFRSF19
Q96PX8	SLITRK1	SLITRK1 KIAA1910 LRRC12 UNQ233/PRO266	0.719859	No	membrane	NULL	extracellular region	GO:0005576	IPR000483;IPR003591	NULL	FGF20;MSTN	SLITRK1
Q9ULC8	ZDHHC8	ZDHHC8 KIAA1292 ZDHHCL1 ZNF378	0.719697	No	membrane	NULL	NULL	NULL	NULL	NULL	NULL	ZDHHC8
P09848	LCT	LCT LPH	0.719677	No	membrane	NULL	NULL	NULL	NULL	NULL	TMPRSS15;CRLF1;LEP;MUC4;INS	LCT
Q6UX41	BTNL8	BTNL8 UNQ702/PRO1347	0.719657	No	membrane	NULL	NULL	NULL	NULL	NULL	NULL	BTNL8
P01597	IGKV1-39	IGKV1-39	0.719636	No	NULL	NULL	extracellular region|extracellular space|extracellular exosome	GO:0005576|GO:0005615|GO:0070062	NULL	NULL	NULL	IGKV1-39
P01036	CST4	CST4	0.719515	Yes	secreted	isExome	extracellular space|extracellular exosome	GO:0005615|GO:0070062	--	--	--	CST4
Q3SXY7	LRIT3	LRIT3	0.719495	No	membrane	NULL	NULL	NULL	IPR003961;IPR003591	NULL	FREM1	LRIT3
Q6IE36	OVOS2	OVOS2	0.719374	No	intracellular	NULL	extracellular space	GO:0005615	NULL	NULL	NULL	OVOS2
Q9HBW1	LRRC4	LRRC4 BAG NAG14 UNQ554/PRO1111	0.719354	No	membrane	NULL	NULL	NULL	IPR000483;IPR003591;IPR000372	NTNG1;NTNG1;NTNG2;NTNG2;NTNG2;NTNG2	NTNG2;NTNG1;ANGPTL3	LRRC4
Q01344	IL5RA	IL5RA IL5R	0.719354	No	membrane&secreted	NULL	extracellular space	GO:0005615	IPR003961	IL5;IL5;IL5;IL5;IL5;IL5	IL5;IL3;CSF2;IL2;IL4;IL13;IL9;IL6;IL10;IL15;THPO;IL11;PDGFB;IL7;IFNG;CSF3;IFNA2;IL12A;IL24;CNTF;EGF;EPO;IFNA4;CTF1;OSM;PRL;IL19;IL17D;LEP;LIF;IL23A;IFNB1;IFNK;IFNA10;IFNA21;IFNA16;IFNA13;IFNA6;IFNA14;PDGFA;CSH2;IFNW1;IFNA7;IL20;IL12B;IFNA5;IFNE;IFNA8;GH1;IL22;CSH1;IFNA1;IFNA17;ADAMTS1;CCL11;TNFSF13;CCL17;CCL24;CCL26	IL5RA
P52797	EFNA3	EFNA3 EFL2 EPLG3 LERK3	0.719313	No	membrane	NULL	NULL	NULL	NULL	NULL	NTN1;SLIT3;SLIT1;FN1;SLIT2;RELN;ADAM10;SEMA4G;SEMA3F;SEMA6C;SEMA5B;SEMA6B;SEMA4B;SEMA3G;SEMA4C;SEMA3D;SEMA6D;SEMA3E;SEMA5A;SEMA4A;SEMA3B;SEMA3C;SEMA3A;SEMA7A;SEMA4D;SEMA6A;SEMA4F;PLXNA1;PLXNA4;PLXNB1;PLXNA3;PLXND1;PLXNB2;PLXNB3;PLXNA2;PLXNC1;VEGFA;CLEC11A;BDNF;NTF3;NTF4;NGF;EPO	EFNA3
Q8N131	TMEM123	TMEM123 KCT3 PSEC0111 UNQ641/PRO1271	0.719172	No	membrane	NULL	NULL	NULL	NULL	NULL	CTSA	TMEM123
P07359	GP1BA	GP1BA	0.719111	No	membrane	isExome	extracellular space|extracellular exosome|extracellular matrix	GO:0005615|GO:0070062|GO:0031012	IPR000483;IPR003591;IPR000372	VWF;VWF;F12	VWF;FGL2;IGFBP7;F2;F12;KNG1;SERPINC1;F10;F9;SERPIND1;SERPINA5;SERPINE2;THPO;HPSE2;CTSG;ADAMTS13;PF4;ANXA5;PLOD1;PPBP;IL17B;KITLG	GP1BA
O15460	P4HA2	P4HA2 UNQ290/PRO330	0.719051	Yes	secreted	NULL	NULL	NULL	--	--	--	P4HA2
P43121	MCAM	MCAM MUC18	0.718869	No	membrane	isExome	extracellular region|extracellular space	GO:0005576|GO:0005615	NULL	NULL	LAMA4;VWF;FN1;BGLAP;NTN1;FGL1;SPP1;SPARC;DSPP;IBSP;ACAN;FGF2;FGF13;MMP2;CSPG4;VEGFA;TNF;CXCL12;VEGFC;LGALS8;NGF;LGALS3;ANGPT1;KITLG;EGF;WNT5A;INS;BMP2;HGF;BMP4	MCAM
Q7L0X0	TRIL	TRIL KIAA0644	0.718707	No	membrane	NULL	extracellular space|extracellular matrix	GO:0005615|GO:0031012	IPR000483;IPR003961;IPR003591	NULL	TLL2;ASTL	TRIL
Q9UHF4	IL20RA	IL20RA UNQ681/PRO1315	0.718646	No	membrane&secreted	NULL	NULL	NULL	IPR003961	IL20;IL20	FNDC7;IL20;IL24;IL19;IL26;IL10;IL17D;IFNB1;IL6;IL22;IFNA13;IL4;IFNG;IFNK;IFNA1;IFNA2;IFNA21;IFNA17;IFNE;CSF2;IL13;IL2;IL5;IL12A;IL7;IFNA16;CNTF;IFNA7;IFNA10;IFNA8;IFNA14;CSF3;IFNA6;IL15;OSM;IL9;IFNA4;IL11;EGF;IL3;PDGFA;CTF1;PRL;LIF;EPO;IL23A;CSH1;IL12B;IFNA5;GH1;CSH2;THPO;PDGFB;IFNW1;LEP	IL20RA
Q9Y5H0	PCDHGA3	PCDHGA3	0.718505	No	membrane	NULL	NULL	NULL	NULL	NULL	NULL	PCDHGA3
B1AKI9	ISM1	ISM1 C20orf82 ISM	0.718121	Yes	secreted	NULL	extracellular region	GO:0005576	--	--	--	ISM1
P13688	CEACAM1	CEACAM1 BGP BGP1	0.718061	No	membrane	isExome	extracellular exosome	GO:0070062	NULL	CLEC4M;CLEC4M	FN1;TECTB;MATN1;PLAU;SERPINB6;CLEC12A;ADAM10;CLEC4D;MMP25;ADAM8;CLEC5A;CLEC4C;INS;IL2;VEGFA;CXCL8;LGALS3;ANXA2;CD209;LGALS9	CEACAM1
A0A0A0MT36	IGKV6D-21	IGKV6D-21	0.718061	No	NULL	NULL	extracellular space	GO:0005615	NULL	NULL	NULL	IGKV6D-21
P01857	IGHG1	IGHG1	0.71796	No	NULL	isExome	extracellular region|extracellular space|extracellular exosome	GO:0005576|GO:0005615|GO:0070062	NULL	LTBP4;FGA;FN1;ELN;TGM4;PAPPA;SERPIND1	NULL	IGHG1
Q96EG1	ARSG	ARSG KIAA1001 UNQ839/PRO1777	0.717899	No	secreted	NULL	extracellular space	GO:0005615	NULL	NULL	LGI2;SULF2;SULF1;GPC1	ARSG
Q6ICH7	ASPHD2	ASPHD2	0.717818	No	membrane	NULL	NULL	NULL	NULL	NULL	NULL	ASPHD2
P08069	IGF1R	IGF1R	0.717717	No	membrane	isExome	NULL	NULL	IPR003961	IGF1;IGF1;IGF1;IGF1;IGF1;IGF1	FN1;CILP;IGFBP3;DCN;IGFBP1;IGFBP2;IGFBP5;IGFBP4;IGFBP6;IGFALS;IGFBP7;IGF1;INS;IGF2;VEGFA;FGF2;EGF;VEGFC;HGF;BDNF;AREG;NGF;KITLG;PDGFB;EREG;NTF3;TGFA;PDGFA;FGF1;FGF7;FGF3;FGF19;FGF9;FIGF;NTF4;PGF;FGF4;FGF6;VEGFB;FGF21;FGF8;CSF1;FGF22;FGF23;FGF18;PDGFD;ANGPT1;PDGFC;FGF10;FGF17;ANGPT2;FGF16;FGF5;FGF20;INS-IGF2;ANGPT4;FLT3LG;SDC1;MSTN;PI3;IL16;WNT3A;GPC3;IL1B;WNT2;IL6;ANXA5;BMP2;BMP4;MMP9;MMP2;LEP;FG…	IGF1R
Q9HAV5	EDA2R	EDA2R TNFRSF27 XEDAR UNQ2448/PRO5727/PRO34080	0.717636	No	membrane	NULL	NULL	NULL	NULL	C1QB	CHADL;EDA	EDA2R
Q96LA6	FCRL1	FCRL1 FCRH1 IFGP1 IRTA5	0.717596	No	membrane&secreted	NULL	NULL	NULL	NULL	NULL	MUC1;MUC15	FCRL1
O43699	SIGLEC6	SIGLEC6 CD33L CD33L1 OBBP1	0.717455	No	membrane&secreted	NULL	extracellular region	GO:0005576	NULL	NULL	PAPPA2;LEP;HTRA4;INHA	SIGLEC6
P01589	IL2RA	IL2RA	0.717394	No	membrane	NULL	NULL	NULL	IPR000436	IL2	IL2;CSF2;IL5;IL3;IL4;IL15;IL6;IL10;IL7;IFNG;IL13;IL9;TNF;CSF3;IFNA1;IFNA2;IL22;EGF;OSM;IFNB1;EPO;IFNA21;IFNA17;PRL;IL12A;IL19;IL11;IL24;IL12B;IL17A;LEP;CNTF;LIF;GH1;IL23A;IFNA10;THPO;IFNW1;PDGFB;CXCL8;IFNA13;CXCL9;IFNA6;IFNA14;IFNA16;PDGFA;IFNA5;IFNA7;IFNA4;IL17D;CCL4;IFNA8;IFNE;CTF1;CCL5;IFNK;CSH2;CSH1;IL20;CCL3;CXCL10;IL1B;CCL11;SERPINB8;SERPINB7;SERPINB2;SERPINB5;CCL2;IL18;FASLG;IL1A;IL16;LTA;…	IL2RA
Q96DZ1	ERLEC1	ERLEC1 C2orf30 XTP3TPB UNQ1878/PRO4321	0.717212	No	secreted	NULL	NULL	NULL	NULL	GH1	THBS2;THBS1;SHH;DHH;IHH;NGLY1;F10;SERPINA1	ERLEC1
P04229	HLA-DRB1	HLA-DRB1	0.716909	No	membrane	isExome	extracellular exosome	GO:0070062	NULL	NULL	CTSS;CTSH;CTSC;CTSB;CTSO;CTSD;CTSE;CTSL;CTSK;CTSV;CTSF;CTSA;INS;TNF;S100A8;IL2;LTA;IL10;ANXA11;IL6;C1QA;IFNG;IL4;IL17A;C1QB	HLA-DRB1
Q7Z5A4	PRSS42	PRSS42 TESSP2	0.716808	No	secreted	NULL	extracellular space	GO:0005615	NULL	NULL	NULL	PRSS42
Q9UK05	GDF2	GDF2 BMP9	0.716727	Yes	secreted	isExome	extracellular region|extracellular exosome|extracellular space	GO:0005576|GO:0070062|GO:0005615	--	--	--	GDF2
P01615	IGKV2D-28	IGKV2D-28	0.716626	No	NULL	NULL	extracellular region|extracellular space|extracellular exosome	GO:0005576|GO:0005615|GO:0070062	NULL	NULL	NULL	IGKV2D-28
P10145	CXCL8	CXCL8 IL8	0.716545	Yes	secreted	isExome	extracellular region|extracellular space	GO:0005576|GO:0005615	--	--	--	CXCL8
Q86SJ2	AMIGO2	AMIGO2 ALI1	0.716505	No	membrane	NULL	NULL	NULL	IPR000483;IPR003591	NULL	NULL	AMIGO2
Q13291	SLAMF1	SLAMF1 SLAM	0.716444	No	membrane&secreted	isExome	extracellular exosome	GO:0070062	NULL	NULL	TNF;KITLG;CLEC2D;THPO;IL4;IL2;IL3;ANXA5;IL7;IFNG;IL6;FLT3LG;IL10;CSF3;CSF2;CXCL12;CCL3;CCL4;CD209	SLAMF1
Q96KX0	LYZL4	LYZL4 LYC4	0.716202	No	secreted	NULL	extracellular space	GO:0005615	NULL	NULL	EGFLAM;ASTL;CLEC3A;CLEC2B;CLEC10A	LYZL4
P40197	GP5	GP5	0.716101	No	membrane	isExome	extracellular exosome	GO:0070062	IPR000483;IPR003591	NULL	VWF;SERPIND1;F2;SERPINC1;SERPINA5;F12;F9;F10;KNG1;SERPINE2;IFNG;S100A10;CCL7	GP5
Q7RTY3	PRSS45	PRSS45 TESSP5	0.716081	No	intracellular	NULL	extracellular space	GO:0005615	NULL	NULL	NULL	PRSS45
Q9HC57	WFDC1	WFDC1 PS20	0.71602	No	secreted	NULL	extracellular space	GO:0005615	NULL	NULL	CRISPLD2;SLPI;TGM2;HTRA3	WFDC1
P04745	AMY1A	AMY1A AMY1; AMY1B AMY1; AMY1C AMY1	0.716	No	secreted	isExome	extracellular space|extracellular exosome	GO:0005615|GO:0070062	NULL	MUC7;MUC7	COL10A1;PRSS1;PRSS3;CST1;MUC7	AMY1A
Q9UK96	FBXO10	FBXO10 FBX10 PRMT11	0.716	No	intracellular	NULL	NULL	NULL	NULL	NULL	NULL	FBXO10
P09326	CD48	CD48 BCM1 BLAST1	0.715939	No	membrane&secreted	isExome	extracellular exosome	GO:0070062	NULL	NULL	IL3;CCL4;CTSS;IL2;TNF;CLEC2D;KITLG;CCL3	CD48
Q96IQ7	VSIG2	VSIG2 CTH CTXL UNQ2770/PRO7154	0.715616	No	membrane	NULL	NULL	NULL	NULL	NULL	NULL	VSIG2
Q9UMF0	ICAM5	ICAM5 TLCN TLN	0.715576	No	membrane	isExome	extracellular matrix organization	GO:0030198	NULL	NULL	IBSP;BCAN;C1QL4;C1QL2;C1QC;CD209;CLEC4M	ICAM5
Q9H8J5	MANSC1	MANSC1 LOH12CR3 UNQ316/PRO361	0.715556	No	membrane&secreted	NULL	NULL	NULL	NULL	NULL	NULL	MANSC1
P04432	IGKV1D-39	IGKV1D-39	0.715495	No	NULL	NULL	extracellular region|extracellular space	GO:0005576|GO:0005615	NULL	NULL	NULL	IGKV1D-39
Q8WY21	SORCS1	SORCS1 SORCS	0.715232	No	membrane	NULL	NULL	NULL	NULL	NULL	NULL	SORCS1
A0A075B6S4	IGKV1D-17	IGKV1D-17	0.714808	No	NULL	NULL	extracellular space	GO:0005615	NULL	NULL	NULL	IGKV1D-17
Q2MKA7	RSPO1	RSPO1	0.714646	Yes	secreted	NULL	extracellular region|extracellular space	GO:0005576|GO:0005615	--	--	--	RSPO1
P15289	ARSA	ARSA	0.714384	No	secreted	NULL	extracellular region|extracellular exosome	GO:0005576|GO:0070062	NULL	CLEC4G	CTSA;CTSC;ELANE;CTSG;HRNR;ANXA2;SERPINB3;S100A7;CTSL;SPAM1;CTSD	ARSA
Q9H106	SIRPD	SIRPD PTPNS1L2	0.714242	No	secreted	NULL	extracellular region	GO:0005576	NULL	NULL	NULL	SIRPD
Q99616	CCL13	CCL13 MCP4 NCC1 SCYA13	0.71396	Yes	secreted	NULL	extracellular region|extracellular space	GO:0005576|GO:0005615	--	--	--	CCL13
Q9Y5G3	PCDHGB1	PCDHGB1	0.713859	No	membrane	NULL	NULL	NULL	NULL	NULL	NULL	PCDHGB1
Q9BZZ2	SIGLEC1	SIGLEC1 SN	0.713313	No	membrane	isExome	extracellular region	GO:0005576	NULL	NULL	IGFBP4;COL4A2;MUC1;CLEC10A;CD209;C1QA;CLEC5A;C1QB;TNF;CXCL9;C1QC;CLEC7A;CLEC12A;CXCL10;TGFB1;CSF1;IL10;CCL8;CLEC4A;CLEC9A;CXCL13;CTSE;ADAMDEC1;CLEC4D;CLEC6A;IL4;CCL18;CLEC12B;CCL19;CSF2;CLEC4E;CCL2;LGALS8	SIGLEC1
Q9UN73	PCDHA6	PCDHA6 CNRS2	0.713192	No	membrane&secreted	NULL	extracellular region	GO:0005576	NULL	NULL	RELN	PCDHA6
Q9Y6N7	ROBO1	ROBO1 DUTT1	0.713172	No	membrane	NULL	NULL	NULL	IPR003961	SLIT2;SLIT2	SLIT2;SLIT3;SLIT1;NTN1;NYX;CXCL12;PLXNA1;SEMA5A;SEMA5B;SEMA6D;SHH;SEMA3A;SEMA6A;MDK;SEMA6C;SEMA3F;PLXNB1;SEMA4G;SEMA3B;SEMA3C;SEMA7A;SEMA6B;SEMA4C;SEMA3G;SEMA3E;SEMA4D;SEMA3D;SEMA4B;SEMA4A;PLXNC1;SEMA4F	ROBO1
A0A0C4DH24	IGKV6-21	IGKV6-21	0.713111	No	NULL	NULL	extracellular space	GO:0005615	NULL	NULL	NULL	IGKV6-21
O14960	LECT2	LECT2	0.713051	No	secreted	NULL	extracellular space	GO:0005615	NULL	NULL	FGG;CTSK	LECT2
Q5ZPR3	CD276	CD276 B7H3 PSEC0249 UNQ309/PRO352	0.712384	No	membrane&secreted	isExome	NULL	NULL	NULL	NULL	IL10;IL4;TNF;IL2;CSF2;IL6;TNFSF4;TNFSF9;IL17A;IFNG;IL15;IL5;IL13;FSTL3;CCL2;LGALS9;IL7;CXCL8;CD209;TNFSF18;CXCL10;CD109;FASLG;VEGFA;CCL5;IL18	CD276
O00220	TNFRSF10A	TNFRSF10A APO2 DR4 TRAILR1	0.712364	No	membrane	isExome	NULL	NULL	NULL	TNFSF10;TNFSF10;TNFSF10;TNFSF10;TNFSF10;TNFSF10;TNFSF10;TNFSF10	MATN4;MATN2;TNFSF10;FASLG;TNF;ANXA5;INS;IL2;TNFSF12;IL6;IL10;IL4;CXCL8;VEGFA	TNFRSF10A
Q9Y5H7	PCDHA5	PCDHA5 CNRS6	0.712263	No	membrane	NULL	NULL	NULL	NULL	NULL	NULL	PCDHA5
P13591	NCAM1	NCAM1 NCAM	0.712162	No	membrane&secreted	isExome	collagen-containing extracellular matrix	GO:0062023	IPR003961	NULL	NCAN;AGRN;COL9A1;COL6A3;COL6A2;COL4A1;COL4A2;COL6A6;COL6A1;COL4A3;COL9A3;COL9A2;COL6A5;COL4A5;COL4A4;FN1;NTNG1;SLIT1;SLIT3;RELN;NTN1;GDNF;NRTN;PSPN;FGF19;ARTN;IL2;IL15;SDC1;BDNF;IL4;TNF;CLEC4C;IL10;BMP4;IFNG;CSF2;IL6;PCSK5;FGF2;AMBP;IL7;IL18;IL17A;FASLG;CSF3;CXCL8;NGF;KITLG;EGF;VEGFA;IL13;ANXA5;CXCL10;TNFSF9;IL5;CD209;IL3;SHH;INS;MDK;CCL5;S100B;SEMA6D;FGF13;CCL2;IFNA1;MUC1;SEMA5B;CCL4;SEMA6A;SDC3…	NCAM1
P08581	MET	MET	0.711859	No	membrane&secreted	isExome	extracellular region	GO:0005576	NULL	HGF;PLXNB2;PLXNB2;PLXNB1;PLXNB1;PLXNB1;PLXNB1;PLXNB1;PLXNB1;PLXNB1;PLXNB1;PLXNB1;HGF;HGF;HGF;HGF;HGF;HGF;HGF;HGF;HGF;MUC1;MUC1;PLXNB3;PLXNB3	DCN;LAMC2;LAMC1;LAMB3;LAMA3;LAMB1;LAMB2;LAMA5;LAMC3;LAMA4;LAMA2;LAMA1;FN1;SPP1;HSPG2;HGF;PLXNB1;SEMA4D;MUC20;SDC1;VEGFA;PLXNB2;PLXNB3;EGF;INS;IGF1;TGFA;FGF2;IGF2;MUC1;VEGFC;AREG;KITLG;FGF7;S100A8;BDNF;NGF;EREG;PGF;PDGFB;FGF1;ANGPT2;HGFAC;FGF19;FIGF;PDGFC;PDGFA;ANGPT1;CSF1;FGF3;NTF4;VEGFB;FGF9;NTF3;FGF8;FGF16;FGF22;FGF6;FGF17;FGF21;PDGFD;FGF10;FLT3LG;FGF4;FGF20;FGF18;FGF5;ANGPT4;FGF23;BMP4;SEMA3B;…	MET
P50895	BCAM	BCAM LU MSK19	0.711596	No	membrane&secreted	isExome	collagen-containing extracellular matrix|extracellular region|extracellular exosome	GO:0062023|GO:0005576|GO:0070062	NULL	NULL	LAMA5	BCAM
Q96RD9	FCRL5	FCRL5 FCRH5 IRTA2 UNQ503/PRO820	0.711475	No	membrane&secreted	NULL	NULL	NULL	NULL	NULL	SERPINB3;MUC1	FCRL5
Q6ZS46			0.711455	No	NULL	NULL	NULL	NULL	--	--	--
A0A1B0GV85	REELD1	REELD1	0.711434	No	NULL	NULL	NULL	NULL	IPR002861	NULL	NULL	REELD1
A8MVW5	HEPACAM2	HEPACAM2 MIKI UNQ305/PRO346	0.711374	No	membrane	NULL	NULL	NULL	NULL	NULL	EMILIN1	HEPACAM2
Q9ULI3	HEG1	HEG1 KIAA1237	0.711212	No	membrane	isExome	extracellular region	GO:0005576	IPR001881	NULL	MUC16	HEG1
Q9Y5G8	PCDHGA5	PCDHGA5	0.711172	No	membrane	NULL	NULL	NULL	NULL	NULL	NULL	PCDHGA5
Q9NQ25	SLAMF7	SLAMF7 CS1 UNQ576/PRO1138	0.71103	No	membrane&secreted	NULL	NULL	NULL	NULL	NULL	SDC1;CTSW	SLAMF7
P07357	C8A	C8A	0.710828	No	secreted	isExome	extracellular region|extracellular space|extracellular exosome	GO:0005576|GO:0005615|GO:0070062	IPR000884	NULL	VTN;FGG;FGA;FGB;FGL1;ANGPTL3;MASP2;ITIH2;F13B;SERPINC1;MBL2;F9;HRG;F7;HABP2;ITIH3;SERPINA10;MASP1;TCHH;SERPINA7;HGFAC;SERPINA4;SERPINA11;AMBP;F2;F12;C1QC;SERPIND1	C8A
Q9Y5F7	PCDHGC4	PCDHGC4	0.710808	No	membrane	NULL	NULL	NULL	NULL	NULL	NULL	PCDHGC4
Q9Y639	NPTN	NPTN SDFR1 SDR1	0.710768	No	membrane	isExome	NULL	NULL	NULL	NULL	EMILIN1;THBS3;EPO;SEMA4F	NPTN
P09228	CST2	CST2	0.710768	Yes	secreted	NULL	extracellular space	GO:0005615	--	--	--	CST2
P80075	CCL8	CCL8 MCP2 SCYA10 SCYA8	0.710687	Yes	secreted	NULL	extracellular space	GO:0005615	--	--	--	CCL8
P26951	IL3RA	IL3RA IL3R	0.710646	No	membrane&secreted	NULL	NULL	NULL	NULL	NULL	IL3;CSF2;IL2;IL5;CLEC4C;IL4;IL10;IL6;IL15;IFNA1;CSF3;IL13;IL7;IFNA21;IFNA17;IFNA2;IFNB1;IFNG;THPO;IL9;EPO;CLEC12A;PDGFB;IL22;OSM;EGF;IL11;IFNA13;IL24;IL19;IL23A;IFNK;IFNA10;LEP;PRL;IFNA4;IFNE;IL12A;IL17D;LIF;IL20;CTF1;CSH1;IFNA6;PDGFA;IFNA8;IFNA16;IFNA5;IFNW1;IL12B;IFNA14;GH1;IFNA7;CSH2;CNTF;COLEC10;CD209;TNF;CLEC9A;FLT3LG;ADAM22;AMBP;CLEC4A;KITLG;IL17A;CXCL10;SDC1;CXCL8	IL3RA
A0A0C4DH73	IGKV1-12	IGKV1-12	0.710182	No	NULL	NULL	extracellular region|extracellular space	GO:0005576|GO:0005615	NULL	NULL	NULL	IGKV1-12
Q5R3F8	ELFN2	ELFN2 KIAA1904 LRRC62 PPP1R29	0.710061	Yes	membrane	NULL	extracellular space|extracellular matrix	GO:0005615|GO:0031012	--	--	--	ELFN2
P01602	IGKV1-5	IGKV1-5	0.709798	No	NULL	isExome	extracellular region|extracellular space|extracellular exosome	GO:0005576|GO:0005615|GO:0070062	NULL	NULL	NULL	IGKV1-5
Q6UWJ8	CD164L2	CD164L2 UNQ6122/PRO20044	0.709596	No	membrane	NULL	NULL	NULL	NULL	NULL	CLEC12B;S100A2;S100A4	CD164L2
P0C7U0	ELFN1	ELFN1 PPP1R28	0.709475	Yes	membrane	NULL	extracellular space|extracellular matrix	GO:0005615|GO:0031012	--	--	--	ELFN1
P01871	IGHM	IGHM	0.709414	No	NULL	isExome	extracellular exosome|extracellular space	GO:0070062|GO:0005615	NULL	FN1;PAPPA	NULL	IGHM
Q00887	PSG9	PSG9 PSG11	0.709273	No	membrane&secreted	NULL	extracellular region	GO:0005576	NULL	TGFB1;TGFB1	TGFB1;SDC2;SDC1;SDC3;SDC4;GPC1;IL2	PSG9
O95274	LYPD3	LYPD3 C4.4A UNQ491/PRO1007	0.709212	No	membrane	isExome	extracellular space|extracellular region	GO:0005615|GO:0005576	NULL	NULL	NTNG2;TECTA;TECTB;NTNG1;BSPH1;CD109;LOXL2;LGALS3;FGF21;PLAU	LYPD3
O75871	CEACAM4	CEACAM4 CGM7	0.709071	No	membrane	NULL	NULL	NULL	NULL	NULL	S100A12;CLEC12A;S100A8;S100A9;CLEC4D	CEACAM4
Q9Y5H4	PCDHGA1	PCDHGA1	0.70899	No	membrane	NULL	NULL	NULL	NULL	NULL	NULL	PCDHGA1
P22413	ENPP1	ENPP1 M6S1 NPPS PC1 PDNP1	0.708889	No	membrane	isExome	extracellular space	GO:0005615	IPR001212	NULL	IBSP;COL4A6;COL4A2;COL4A4;COL4A1;COL4A5;COL4A3;LAMA3;LAMA5;DMP1;SPP1;MGP;MEPE;BGLAP;FGF23;INS;FAM20C	ENPP1
Q15116	PDCD1	PDCD1 PD1	0.708566	No	membrane	NULL	NULL	NULL	NULL	NULL	IL2;IL10;IFNG;TNF;IL4;IL17A;CSF2;LGALS9;IL7;FASLG;IL6;VEGFA;TNFSF4;IL15;CXCL13;CLEC4G;CXCL9;IL13;CCL4	PDCD1
O95185	UNC5C	UNC5C UNC5H3	0.708505	No	membrane&secreted	NULL	NULL	NULL	IPR000884	NTN1	NTN1;NTN5;NTN3;NTNG1;SLIT3;NTN4;SLIT1;NTNG2;SLIT2;PLXNB1;SEMA3A;PLXNC1;SEMA6A;SEMA6D;SEMA6C	UNC5C
O75015	FCGR3B	FCGR3B CD16B FCG3 FCGR3 IGFR3	0.708323	No	membrane	NULL	extracellular exosome|extracellular region	GO:0070062|GO:0005576	NULL	NULL	NTNG2;TECTA;TECTB;NTNG1;CD109;CCL3L3;S100A12;C1QB;S100A8;S100A4;CLEC4D;C1QC;S100A9;TNF;IL2;C1QA;CLEC12A	FCGR3B
P55895	RAG2	RAG2	0.708242	No	intracellular	NULL	NULL	NULL	NULL	NULL	VWF;FBN1;IL7;IL2;IL4;INS;IL17A;IL10;IL15;IL13;IFNG;IL6;IL5;TNF;IL9	RAG2
Q86SU0	ILDR1	ILDR1	0.708222	No	membrane&secreted	isExome	NULL	NULL	NULL	NULL	SPON1	ILDR1
A8MTI9	PRSS47	PRSS47	0.708141	No	NULL	NULL	extracellular space	GO:0005615	NULL	NULL	NULL	PRSS47
A0A075B6P5	IGKV2-28	IGKV2-28	0.70802	No	NULL	NULL	extracellular region|extracellular space	GO:0005576|GO:0005615	NULL	NULL	NULL	IGKV2-28
P06276	BCHE	BCHE CHE1	0.707838	No	secreted	isExome	extracellular region	GO:0005576	NULL	NULL	COLQ;COCH;FBN1;VWF;AGRN;F2;INS;BDNF;NGF;BTC;IL6;HRG	BCHE
Q15782	CHI3L2	CHI3L2	0.707737	No	secreted	NULL	extracellular space|extracellular region	GO:0005615|GO:0005576	NULL	NULL	CILP;CILP2;ANGPTL7	CHI3L2
P06315	IGKV5-2	IGKV5-2	0.707475	No	NULL	NULL	extracellular region|extracellular space	GO:0005576|GO:0005615	NULL	NULL	NULL	IGKV5-2
P54107	CRISP1	CRISP1 AEGL1	0.707313	No	secreted	NULL	extracellular space	GO:0005615	NULL	NULL	ZP4;ZP3;ADAM2;TCHHL1;ASTL;ADAM15;TGM3;ADAM7	CRISP1
Q9BZP6	CHIA	CHIA	0.707212	No	secreted	NULL	extracellular region|extracellular space	GO:0005576|GO:0005615	NULL	NULL	IL13;IL4	CHIA
O75976	CPD	CPD	0.707071	No	membrane	isExome	extracellular space|extracellular exosome	GO:0005615|GO:0070062	NULL	NULL	HTRA1	CPD
P42658	DPP6	DPP6	0.707051	No	membrane	NULL	NULL	NULL	NULL	NULL	LGI1;CBLN4;CBLN1;LOX	DPP6
A0A0C4DH38	IGHV5-51	IGHV5-51	0.707051	No	NULL	NULL	NULL	NULL	NULL	NULL	NULL	IGHV5-51
B6A8C7	TARM1	TARM1	0.70697	No	membrane	NULL	NULL	NULL	NULL	NULL	CLEC12A;CLEC4D;PLAU;SERPINB6;MMP25;CLEC5A;ADAM10;ADAM8;CLEC4C	TARM1
F5H4A9	C3orf80	C3orf80	0.706626	No	membrane	NULL	NULL	NULL	NULL	NULL	NULL	C3orf80
P04746	AMY2A	AMY2A	0.706444	No	secreted	isExome	extracellular space|extracellular exosome|extracellular region	GO:0005615|GO:0070062|GO:0005576	NULL	NULL	CELA1;PRSS1;CELA2A;INS;PRSS3;TPO;F9	AMY2A
Q9UF33	EPHA6	EPHA6 EHK2 HEK12	0.706141	No	membrane	NULL	NULL	NULL	IPR003961	NULL	VWA3A;SLIT1;SLIT2;NTNG1;SLIT3;NTN1;FN1;ADAM10;SEMA3F;SEMA4F;SEMA3E;SEMA5B;SEMA7A;SEMA5A;SEMA6C;SEMA3G;SEMA6B;SEMA4G;SEMA3D;SEMA4C;SEMA4B;SEMA3C;SEMA6D;SEMA4A;SEMA4D;SEMA3A;SEMA3B;SEMA6A;PLXND1;PLXNA1;PLXNC1;BDNF;PLXNA4;PLXNA3;PLXNB1;PLXNB3	EPHA6
Q93033	CD101	CD101 EWI101 IGSF2 V7	0.70604	No	membrane	isExome	extracellular exosome	GO:0070062	NULL	NULL	CLEC12A;CLEC9A	CD101
Q99572	P2RX7	P2RX7	0.705717	No	membrane	NULL	extracellularly ATP-gated cation channel activity|calcium-mediated signaling using extracellular calcium source	GO:0004931|GO:0035585	NULL	NULL	IL1B;IL18;IL6;VEGFA;CCL2;TNF;IL10;CTSB;CCL19;XCL2;BDNF;XCL1	P2RX7
A0A0B4J1V0	IGHV3-15	IGHV3-15	0.705636	No	NULL	NULL	NULL	NULL	NULL	NULL	NULL	IGHV3-15
P14410	SI	SI	0.705495	No	membrane	isExome	extracellular exosome	GO:0070062	NULL	NULL	INS;MEP1A;CSPG5;CTSD	SI
Q96DU3	SLAMF6	SLAMF6 KALI UNQ6123/PRO20080	0.705333	No	membrane	isExome	extracellular exosome	GO:0070062	NULL	NULL	CLEC2B;IL15;IL2;FASLG	SLAMF6
Q6UXG2	KIAA1324	KIAA1324 EIG121 UNQ2426/PRO4985	0.705333	No	membrane&secreted	isExome	extracellular exosome	GO:0070062	NULL	NULL	NULL	KIAA1324
P58335	ANTXR2	ANTXR2 CMG2	0.705152	No	membrane	isExome	extracellular region	GO:0005576	IPR002035	NULL	EDIL3;VWF;LAMB1;HMCN2;SCUBE1;SCUBE2	ANTXR2
P13501	CCL5	CCL5 D17S136E SCYA5	0.705111	Yes	membrane&secreted	NULL	extracellular region|extracellular space	GO:0005576|GO:0005615	--	--	--	CCL5
Q9HB29	IL1RL2	IL1RL2 IL1RRP2	0.705071	No	membrane&secreted	isExome	NULL	NULL	NULL	NULL	IL1F10;IL18;IL1RN;IL2;IL1A;IL17A;IL1B;CXCL8;IL6	IL1RL2
Q9UI42	CPA4	CPA4 CPA3 UNQ694/PRO1339	0.704909	No	secreted	NULL	extracellular space	GO:0005615	NULL	NULL	SRGN;POSTN;CTSG;CELA3B;CELA2A;CELA2B;CCL26;CELA3A	CPA4
Q86VZ4	LRP11	LRP11	0.704889	No	membrane&secreted	NULL	NULL	NULL	NULL	NULL	NULL	LRP11
P00739	HPR	HPR	0.704626	No	secreted	isExome	extracellular space|extracellular exosome|extracellular region	GO:0005615|GO:0070062|GO:0005576	NULL	NULL	LPA;ITIH4;HPX;SERPINA5;SERPINA1;HPSE2;AMBP	HPR
P05451	REG1A	REG1A PSPS PSPS1 REG	0.704525	Yes	secreted	NULL	extracellular exosome|extracellular space	GO:0070062|GO:0005615	--	--	--	REG1A
P12034	FGF5	FGF5	0.704404	Yes	secreted	NULL	extracellular region|extracellular space	GO:0005576|GO:0005615	--	--	--	FGF5
Q8IZJ3	CPAMD8	CPAMD8 KIAA1283	0.704242	Yes	secreted	NULL	extracellular space	GO:0005615	--	--	--	CPAMD8
P29376	LTK	LTK TYK1	0.704081	No	membrane&secreted	isExome	NULL	NULL	NULL	NULL	INS;MDK;FGF19;PTN	LTK
Q29983	MICA	MICA PERB11.1	0.704061	No	membrane	isExome	extracellular space	GO:0005615	NULL	LGALS3;LGALS3	IL15;LGALS3;IL2;TNF;FASLG;LTA;IFNA1;TNFSF9;IL10;ADAM10;CLEC2B;IL18;IFNG	MICA
Q6DN72	FCRL6	FCRL6 FCRH6	0.703818	No	membrane	NULL	NULL	NULL	NULL	NULL	MFAP1	FCRL6
Q969J5	IL22RA2	IL22RA2 UNQ5793/PRO19598/PRO19822	0.703556	No	secreted	NULL	extracellular space|extracellular region	GO:0005615|GO:0005576	IPR003961	IL22;IL22;IL22;IL22	IL22;IL24;IL19;IL10;IL17D;IL6;IL9;LIF;IL7;IFNG;IFNA13;CSF2;IFNA2;IL23A;IL13;IL4;IL20;IL11;REG3G;IL15;IFNB1;IL5;IL2;IFNE;OSM;IFNA1;CSF3;CNTF;IFNA21;IL12B;LEP;EGF;IFNA17;IFNK;CTF1;IFNA4;GH1;IFNA8;IFNA5;PDGFB;IFNA6;CSH1;IFNA16;CSH2;IFNA7;IFNW1;IFNA10;PRL;EPO;IFNA14;PDGFA;THPO;IL12A;IL3;IL26;IL18;IL17A	IL22RA2
O60667	FCMR	FCMR FAIM3 TOSO	0.703374	No	membrane&secreted	NULL	extracellular region	GO:0005576	NULL	NULL	NULL	FCMR
Q9NR96	TLR9	TLR9 UNQ5798/PRO19605	0.703071	No	membrane	NULL	extracellular region	GO:0005576	IPR003591	NULL	FN1;IL10;IL6;TNF;CXCL8;TNFSF13B;IL18;IL4;CLEC7A;IL17A;CSF2;IL2;IFNB1;CCL2;IL1B;IL3;CXCL10;MMP9;CD209;CCL5;CLEC4C;IFNA1;IFNG;IL13;IL5;S100B;CCL3;CLEC4E;IL15;MMP2;CLEC6A;IGF1;FSTL1;CXCL1;FLT3LG;INS;CCL4;CXCL9;VEGFA;MBL2;CXCL2;CSF3;CLEC9A;CSF1;IFNA2;CLEC4A;IFNA21;IFNA17;CLEC10A;FASLG;IL7;CCL20;CLEC3A;CLEC2B;CXCL12;TNFSF4;IL23A;ANXA5;ITIH4;ELANE;IL1RN;CCL22;GDF15;IL22;IL17F;CCL19;CCL17;TNFSF11;TNFSF1…	TLR9
Q96NI6	LRFN5	LRFN5 C14orf146 SALM5	0.703071	No	membrane&secreted	NULL	NULL	NULL	IPR003591	NULL	NTNG1	LRFN5
Q9ULH4	LRFN2	LRFN2 KIAA1246 SALM1	0.70299	No	membrane	NULL	NULL	NULL	IPR000483;IPR003961;IPR003591	NULL	NTNG1;NTNG2;FN1;CBLN1	LRFN2
O60844	ZG16	ZG16	0.70297	No	secreted	NULL	collagen-containing extracellular matrix	GO:0062023	NULL	NULL	CELA3B;CELA3A	ZG16
P55081	MFAP1	MFAP1	0.702929	Yes	intracellular	NULL	extracellular region	GO:0005576	--	--	--	MFAP1
P23470	PTPRG	PTPRG PTPG	0.702869	No	membrane	isExome	extracellular exosome	GO:0070062	IPR003961	NULL	LUM;FN1	PTPRG
Q14508	WFDC2	WFDC2 HE4 WAP5	0.702788	No	secreted	NULL	extracellular space|extracellular exosome	GO:0005615|GO:0070062	NULL	PTN	VWA2;SLPI;MUC16	WFDC2
P04433	IGKV3-11	IGKV3-11	0.702667	No	NULL	NULL	extracellular region|extracellular space|extracellular exosome	GO:0005576|GO:0005615|GO:0070062	NULL	NULL	NULL	IGKV3-11
O95498	VNN2	VNN2	0.702525	No	membrane&secreted	NULL	extracellular region	GO:0005576	NULL	NULL	NTNG1;NTNG2;TECTB;TECTA;CD109;S100A12;S100A9;SERPINE2;S100A8	VNN2
P15509	CSF2RA	CSF2RA CSF2R CSF2RY	0.702465	No	membrane&secreted	NULL	extracellular region	GO:0005576	IPR003961	NULL	CSF2;SFTPB;IL3;IL5;SFTPC;IL2;SFTPD;SFTPA1;SFTPA2;SFTA3;CSF3;IL6;IL4;IL10;IL15;EPO;THPO;IL7;IL13;IFNG;PDGFB;OSM;EGF;IL9;IL11;IFNK;IL17D;IL19;LEP;IL22;IFNB1;CNTF;CSH2;IFNA4;IL23A;IFNA21;IL24;IFNA17;PRL;LIF;IL20;IFNE;IFNA2;IFNA1;CTF1;IFNA6;IL12A;CSH1;IFNA13;IL12B;PDGFA;IFNA5;IFNW1;GH1;IFNA7;IFNA16;IFNA8;IFNA10;IFNA14;LGALS4;CSF1;FLT3LG	CSF2RA
Q9NX94	WBP1L	WBP1L C10orf26 OPA1L	0.702465	No	membrane	NULL	NULL	NULL	NULL	NULL	NULL	WBP1L
Q13349	ITGAD	ITGAD	0.702242	No	membrane	NULL	extracellular matrix organization	GO:0030198	IPR002035	NULL	FGG;FGA;FGB;EMILIN1;SERPINB3	ITGAD
Q9Y3R4	NEU2	NEU2	0.702222	No	intracellular	NULL	NULL	NULL	NULL	NULL	CTSA	NEU2
Q8NBK3	SUMF1	SUMF1 PSEC0152 UNQ3037/PRO9852	0.702141	No	secreted	NULL	NULL	NULL	NULL	NULL	COL4A6;SULF1;SULF2;ANXA3	SUMF1
Q6ZU45	CLEC20A	CLEC20A	0.702101	No	secreted	NULL	NULL	NULL	IPR001304	NULL	NULL	CLEC20A
Q13634	CDH18	CDH18 CDH14	0.70196	No	membrane&secreted	NULL	NULL	NULL	NULL	NULL	CLEC3A	CDH18
Q9P121	NTM	NTM IGLON2 NT UNQ297/PRO337	0.701879	No	membrane&secreted	NULL	extracellular region	GO:0005576	NULL	NULL	NTNG1;NTNG2;TECTA;TECTB;MFGE8;CD109	NTM
P55774	CCL18	CCL18 AMAC1 DCCK1 MIP4 PARC SCYA18	0.701778	Yes	secreted	NULL	extracellular space	GO:0005615	--	--	--	CCL18
P06310	IGKV2-30	IGKV2-30	0.701475	No	NULL	NULL	extracellular region|extracellular space|extracellular exosome	GO:0005576|GO:0005615|GO:0070062	NULL	NULL	NULL	IGKV2-30
A0A0C4DH69	IGKV1-9	IGKV1-9	0.701475	No	NULL	NULL	extracellular space	GO:0005615	NULL	NULL	NULL	IGKV1-9
Q9HCL0	PCDH18	PCDH18 KIAA1562	0.701253	No	membrane	NULL	NULL	NULL	NULL	NULL	COL19A1	PCDH18
Q9UKX5	ITGA11	ITGA11 MSTP018	0.701131	No	membrane	isExome	extracellular matrix organization	GO:0030198	IPR002035	NULL	COL1A1;COL1A2;COL9A3;COL9A1;COL9A2;COL4A1;COL4A2;LAMA4;LAMC2;THBS2;LAMA5;TNN;COL6A2;COL6A3;LAMA3;LAMB1;LAMA1;LAMA2;CHAD;COL4A6;VTN;COL6A1;LAMC1;THBS1;TNC;COL4A5;COL4A4;COMP;THBS4;TNR;LAMC3;LAMB3;COL2A1;COL6A5;THBS3;COL6A6;RELN;VWF;TNXB;COL4A3;SPP1;LAMB2;LAMB4;IBSP;EMILIN1;COL5A1;FN1;COL3A1;IGF2	ITGA11
Q8WXG8	S100Z	S100Z	0.70103	Yes	intracellular	NULL	NULL	NULL	--	--	--	S100Z
A0A0A0MRZ8	IGKV3D-11	IGKV3D-11	0.700848	No	NULL	NULL	extracellular space	GO:0005615	NULL	NULL	NULL	IGKV3D-11
Q8NCL9	APCDD1L	APCDD1L	0.700848	No	membrane	NULL	NULL	NULL	NULL	NULL	NULL	APCDD1L
P08648	ITGA5	ITGA5 FNRA	0.700828	No	membrane	isExome	extracellular matrix organization	GO:0030198	NULL	FN1;FGG;FN1;FN1;FN1;FN1;CTGF;ADAM15;CX3CL1	FN1;COL18A1;SPP1;FGG;FBN1;COMP;FBN2;AGRN;FBN3;FGB;FGA;COL1A1;VTN;LAMA1;LAMA2;THBS1;TNC;LAMA3;LAMC1;LAMC2;LAMA4;COL4A2;LAMA5;COL4A1;COL6A2;LAMB1;THBS2;COL1A2;COL6A1;LAMB3;VWF;COL6A3;LAMC3;THBS3;COL2A1;IBSP;RELN;THBS4;COL4A6;COL4A5;TNN;TNR;COL4A4;LAMB2;LAMB4;COL6A6;COL4A3;CHAD;COL9A2;COL6A5;COL9A3;TNXB;COL9A1;EMILIN1;CTGF;IGFBP2;HSPG2;COL5A1;TGFBI;COL5A2;SPARC;COL3A1;ANGPT1;PLAU;FIGF;ANGPTL3;FGF2;A…	ITGA5
Q7L985	LINGO2	LINGO2 LERN3 LRRN6C UNQ9234/PRO31993	0.700808	No	membrane	NULL	extracellular space|extracellular matrix	GO:0005615|GO:0031012	IPR003591;IPR000372	NULL	IFNK;ANGPTL6;CBLN4	LINGO2
P54756	EPHA5	EPHA5 BSK EHK1 HEK7 TYRO4	0.700768	No	membrane	isExome	NULL	NULL	IPR003961	NULL	NTN1;FN1;TSPEAR;SLIT3;SLIT2;SLIT1;ADAM10;SEMA5B;SEMA6D;SEMA5A;SEMA6C;SEMA6A;SEMA3E;SEMA3A;SEMA3C;SEMA7A;SEMA3F;SEMA4C;SEMA4B;SEMA6B;SEMA4G;SEMA3G;SEMA3D;SEMA4A;SEMA4D;SEMA3B;PLXNA1;SEMA4F;PLXNA4;PLXNB3;PLXNA2;PLXNA3;BDNF;INS;ADAMTS3;PLXNB1;PLXND1;PLXNC1;PLXNB2	EPHA5
Q86YD3	TMEM25	TMEM25 UNQ2531/PRO6030	0.700667	No	membrane&secreted	NULL	extracellular region	GO:0005576	NULL	NULL	F13B	TMEM25
P13473	LAMP2	LAMP2	0.700667	No	membrane	isExome	extracellular exosome|extracellular space	GO:0070062|GO:0005615	NULL	NULL	COL4A5;CTSD;CTSE;CTSB;CTSA;TNF;ANXA4;CTSL;LGALS3;IL22	LAMP2
O15165	LDLRAD4	LDLRAD4 C18orf1	0.700667	No	membrane	NULL	NULL	NULL	NULL	NULL	CTHRC1	LDLRAD4
Q6UXZ3	CD300LD	CD300LD CD300D CMRF35A4 UNQ9218/PRO28686	0.700646	No	membrane	NULL	NULL	NULL	NULL	NULL	NULL	CD300LD
A0A0B4J1Z2	IGKV1D-43	IGKV1D-43	0.700626	No	NULL	NULL	extracellular space	GO:0005615	NULL	NULL	NULL	IGKV1D-43
A0A0J9YXX1	IGHV5-10-1	IGHV5-10-1	0.700606	No	NULL	NULL	NULL	NULL	NULL	NULL	NULL	IGHV5-10-1
O14793	MSTN	MSTN GDF8	0.700606	Yes	secreted	NULL	extracellular space	GO:0005615	--	--	--	MSTN
P01599	IGKV1-17	IGKV1-17	0.700566	No	NULL	NULL	extracellular region|extracellular space|extracellular exosome	GO:0005576|GO:0005615|GO:0070062	NULL	NULL	NULL	IGKV1-17
Q96S42	NODAL	NODAL	0.700505	Yes	secreted	NULL	extracellular space	GO:0005615	--	--	--	NODAL
Q8N6Y1	PCDH20	PCDH20 PCDH13	0.700343	No	membrane	NULL	NULL	NULL	NULL	NULL	NULL	PCDH20
Q9BYE9	CDHR2	CDHR2 PCDH24 PCLKC	0.700283	No	membrane	isExome	extracellular exosome	GO:0070062	NULL	NULL	NULL	CDHR2
A0A0A0MRZ9	IGLV5-52	IGLV5-52	0.700222	No	NULL	NULL	extracellular space	GO:0005615	NULL	NULL	NULL	IGLV5-52
Q9Y5G4	PCDHGA9	PCDHGA9	0.700202	No	membrane	NULL	NULL	NULL	NULL	NULL	NULL	PCDHGA9
Q658N2	WSCD1	WSCD1 KIAA0523	0.7	No	secreted	NULL	NULL	NULL	NULL	NULL	NULL	WSCD1
Q17R60	IMPG1	IMPG1 IPM150 SPACR	0.691535	Yes	secreted	NULL	extracellular matrix|extracellular matrix structural constituent	GO:0031012|GO:0005201	--	--	--	IMPG1
Q9NQ76	MEPE	MEPE	0.689374	Yes	secreted	NULL	extracellular matrix protein binding|extracellular matrix|extracellular matrix structural constituent	GO:1990430|GO:0031012|GO:0005201	--	--	--	MEPE
Q07283	TCHH	TCHH THH THL TRHY	0.685859	Yes	intracellular	NULL	NULL	NULL	--	--	--	TCHH
