# Supplementary material for: ECMPride: prediction of human extracellular matrix proteins based on the ideal dataset using hybrid features with domain evidence
Source: PeerJ. 2020 Apr 29;8:e9066. doi: 10.7717/peerj.9066 (PMC7195829; doi:10.7717/peerj.9066)
Supplement: Table S8 [file peerj-08-9066-s008.xlsx]

## Sheet: Fig. 3A
ECMPride	Matrisome	ECMPride|Matrisome
DLL4	BGLAP	COL11A2
STAB1	BSPH1	COL5A1
JAG1	DDX26B	SVEP1
FCGBP	ELSPBP1	COL5A3
JAG2	IGFBP1	SNED1
USH2A	IGFBP2	COL5A2
LRP1	IGFBP3	VWF
STAB2	LGI2	ADAMTS10
CRB1	LGI3	THBS3
CNTNAP3B	POMZP3	COL2A1
CNTNAP3	RSPO2	THBS1
NOTCH1	RSPO3	COL4A4
CNTNAP4	TNFAIP6	CRIM1
DLL3	TSPEAR	NID1
NOTCH2	VWA3A	AGRN
CNTNAP5	VWA3B	THBS4
NOTCH3	VWA5A	FBN2
DLK1	VWA5B1	TECTA
PEAR1	VWA7	ADAMTS17
DNER	VWA9	COL4A3
OTOGL	SRGN	COL3A1
CNTNAP2	ANXA10	TNC
LRP1B	ANXA13	HSPG2
CSMD3	ANXA8	ADAMTS12
CORIN	ANXA8L1	COL1A2
ATRN	ANXA9	COL4A2
CNTNAP1	C1QTNF1	FBN3
CD163L1	C1QTNF4	COL4A6
NOTCH4	CD209	FBLN7
DLL1	CLEC10A	FBN1
CSMD1	CLEC12A	BMPER
SUSD2	CLEC12B	EFEMP2
HHIPL1	CLEC17A	LTBP4
SELE	CLEC19A	FBLN1
LRP2	CLEC1A	COL1A1
MAMDC4	CLEC1B	MEGF6
C1S	CLEC2A	COL11A1
SUSD1	CLEC2B	NTN4
MALRD1	CLEC2D	SSPO
C1RL	CLEC2L	LAMB4
CFHR5	CLEC4A	ADAMTS20
CFHR4	CLEC4C	COL16A1
CSMD2	CLEC4D	MEGF8
THSD7A	CLEC4E	FBLN2
CD163	CLEC4F	COL22A1
NRP1	CLEC4G	CRELD1
CRB2	CLEC4M	FN1
ITGB4	CLEC5A	ADAM9
ATRNL1	CLEC6A	PRSS12
C4BPA	CLEC7A	NTN3
SEZ6L2	EMCN	MASP2
VLDLR	GPC2	COL24A1
FNDC3A	GPC3	LAMB2
CD93	GPC5	NPNT
CR1L	GRIFIN	COL19A1
FNDC3B	LGALS13	FRAS1
C2	LGALS14	TNR
LRP12	LGALS16	EGF
UMOD	LMAN1L	LTBP3
ITGBL1	MUC12	KCP
NOTCH2NL	MUC15	CHRDL2
KLK13	MUC21	ADAM12
LRP10	MUC22	TNXB
MRC2	MUC7	MMP12
THBD	MUC8	ADAMTS16
THSD7B	MUCL1	MMP20
CFH	PARM1	COL7A1
C1R	PLXDC1	COL4A1
TMPRSS6	PROL1	EFEMP1
SSC4D	REG4	ST14
CR2	SDC1	MMP16
LRP8	SDC4	F7
CR1	SEMA3D	THBS2
LRP3	SFTA2	MEGF10
TMPRSS2	SFTA3	CHRDL1
NRXN3	SFTPB	ADAMTS8
CELSR3	SFTPC	NID2
NAGPA	CST11	COL12A1
KLK8	CST7	OTOG
TMPRSS9	CST8	MMP2
TENM4	CST9	MMP9
CTRC	CST9L	LTBP1
CFB	CSTL1	MMP14
TENM1	CTSE	COL8A2
CUBN	CTSO	LAMA1
CD248	EGLN1	COL13A1
GRN	EGLN2	COL14A1
OVCH2	EGLN3	COL4A5
SELP	FAM20A	ADAMTS9
CD5L	FAM20B	ADAMTS3
TENM2	HMSD	MMP3
PTPRS	HYAL1	COL15A1
PTPRJ	HYAL2	COL9A1
OVCH1	HYAL3	ADAMTS4
TENM3	HYAL4	MEGF11
APOH	KY	COL28A1
PROZ	LEPREL1	F12
PTPRH	LEPREL2	ADAMTS5
CD55	NGLY1	ADAMTS13
SCARF2	OGFOD1	COL6A2
TMPRSS7	OGFOD2	SRPX
LIFR	P4HA1	LAMA5
PRSS33	P4HA3	COL25A1
CELSR1	P4HTM	DMBT1
SDK1	PAPPA2	ADAMTSL1
NRXN1	PI3	ADAM19
MPL	PLOD1	COMP
ITGB8	PLOD2	SEMA4A
TPSAB1	SERPINB2	CELA3B
TPSB2	SERPINE3	FBLN5
CFHR2	SERPINI1	MMP8
TNFRSF8	SERPINI2	MMP25
CELSR2	SPAM1	COL9A3
ADGRB2	TGM6	LTBP2
ITGB5	TIMP4	VWCE
TNFRSF1B	AMH	C1QL3
CFI	ANGPT1	LAMC3
TNFRSF1A	ANGPT2	NTNG2
GPNMB	ANGPT4	LOXL4
HP	ANGPTL1	ADAM8
ADGRB1	ANGPTL3	SEMA3G
IL27RA	ANGPTL5	CELA2B
CSF3R	AREG	PAPLN
NRP2	ARTN	LAMA3
IL6R	BDNF	ADAM15
TMEFF2	BMP5	MMP19
GZMH	BMP6	SEMA3F
TMPRSS5	BRINP2	ADAMTS18
PTPRT	BRINP3	COL6A1
NRXN2	BTC	KAL1
GZMK	CBLN2	ADAMTS6
FAT4	CBLN3	MATN3
TIE1	CCL14	COL6A3
LDLR	CCL15	SEMA6C
TMEFF1	CCL16	ADAMTSL2
SORL1	CCL17	COL21A1
CNTN5	CCL20	EGFLAM
PTPRB	CCL22	MST1
CDON	CCL23	LOXL3
IL12RB2	CCL24	TNN
ITGB3	CCL25	MMP28
KLK15	CCL26	LAMB1
PROS1	CCL27	MUC5B
CTRL	CCL3	ADAM22
TNFRSF11A	CCL3L3	PODNL1
CEMIP	CCL4	PCOLCE2
CRISP3	CCL4L1	MMP1
TMPRSS11D	CCL4L2	MMP10
PRSS23	CCL7	TINAGL1
PRSS22	CLCF1	LOXL2
HPN	CNTF	COLQ
UNC5B	CRHBP	ADAM10
LDLRAD3	CRLF3	BGN
SEZ6	CSF1	COL10A1
LILRB2	CSF2	C1QL2
KLK12	CSF3	F13B
C7	CSH1	EGFL7
ARSH	CSH2	CYR61
CD5	CSHL1	PAMR1
KIAA0319L	CTF1	CLEC18A
FAT3	CX3CL1	MMP11
CPXM1	CXCL10	LAMA2
DCC	CXCL11	HPX
IL6ST	CXCL6	EYS
CD46	CXCL9	COL26A1
RELT	DHH	COL8A1
NECTIN3	EDA	TLL1
NETO1	EPGN	COL9A2
TYRP1	EPO	SERPINA4
OSMR	EREG	NTNG1
CNTN2	FASLG	SEMA4D
DCBLD1	FGF11	COL23A1
PRSS44	FGF12	GAS6
LILRB1	FGF13	THSD4
CNTN3	FGF14	TLL2
LILRB5	FGF16	SEMA5B
PRSS8	FGF17	OTOL1
IL31RA	FGF18	WISP1
UNC5D	FGF19	C1QTNF5
GALNS	FGF21	COL27A1
KREMEN2	FGF22	ADIPOQ
PTPRQ	FGF23	CRLF1
DCBLD2	FGF3	NELL2
CFHR1	FGF4	SCUBE1
SIRPB2	FGF6	MUC6
LTBR	FGF7	CRISPLD2
HHIPL2	FGF8	NOV
IL12RB1	FGFBP1	SEMA3C
NGFR	FGFBP3	A2ML1
PRSS3P2	FIGF	PCSK5
ITGB2	FLT3LG	CELA2A
DLK2	FSTL1	COL20A1
TNFRSF25	GDF1	WNT10A
PCSK4	GDF3	BMP8A
KIR3DX1	GDF5	LAMC1
INSRR	GDF6	LPA
PRSS29P	GDF9	SCUBE2
TYR	GDNF	ADAMTS14
DCT	GH1	ZP1
VSIG10L	GH2	SEMA7A
KLK7	HBEGF	IGFBP7
IL11RA	IFNA1	TSKU
MRC1	IFNA10	PODN
LDLRAD2	IFNA13	EDIL3
PKHD1	IFNA14	SERPINB6
CD27	IFNA16	SRPX2
CA10	IFNA17	S100A12
PRSS53	IFNA2	ADAMTS15
PTPRK	IFNA21	MXRA5
PROC	IFNA4	MBL2
LRRC70	IFNA5	MASP1
LEPR	IFNA6	NTN5
TNFRSF6B	IFNA7	GDF10
ICAM1	IFNA8	FREM2
ANTXRL	IFNB1	WNT11
WFDC3	IFNE	WISP2
ITGAL	IFNG	SFTPD
PTPRM	IFNK	ADAM2
KLK4	IFNW1	F2
ROBO3	IGF1	SEMA4B
TEK	IGF2	C1QA
CRTAC1	IHH	CLEC18B
VSIG4	IL10	HCFC1
UNC5A	IL11	FCN3
TMPRSS11A	IL12A	SERPINB8
IGHA1	IL13	SCUBE3
LILRA1	IL15	COL18A1
ACR	IL17A	AMBP
SCARF1	IL17B	CILP2
TMPRSS4	IL17C	VIT
LDLRAD1	IL17F	WNT5A
KLK9	IL18	MMP13
ITGAX	IL19	MATN2
MFRP	IL1A	SERPINA11
PTPRU	IL1B	WNT2B
TNFRSF14	IL1F10	BMP1
PTPRD	IL1F5	LUM
LILRB3	IL1F6	CTSC
CTRB1	IL1F7	MFAP4
ITGA1	IL1F8	PRSS1
ITGB7	IL1F9	HABP2
SDK2	IL1RN	C1QC
ARSD	IL2	ADAMTSL5
FAT1	IL20	MMP24
PCDH1	IL22	COL6A6
LAG3	IL23A	NELL1
IGSF9B	IL24	SERPINE1
DSCAML1	IL25	ADAMTS2
C6	IL26	C1QB
PCDH15	IL3	SERPINA5
OSCAR	IL34	TGM3
PTPRO	IL4	C1QL4
PMEL	IL5	DCN
CD33	IL6	SEMA3B
FAT2	IL7	COL6A5
BOC	IL9	ADAMTS7
KLK5	INHA	S100A1
TPSD1	INS	SEMA6D
NLGN1	INS-IGF2	SERPINA3
KIRREL2	INSL3	F9
NEO1	INSL5	ADAMTSL4
KLK2	INSL6	HMCN1
AZU1	ISM2	ADAMDEC1
SGSH	KITLG	WNT5B
LY75	LEP	COLEC11
HEPH	LIF	HAPLN3
PRSS48	LTB	WNT6
CDSN	NGF	CELA1
PKHD1L1	NRG1	ADAM20
MAMDC2	NRG4	SEMA4C
PRSS21	NRTN	IGFALS
TMEM2	NTF3	WNT9A
MARCO	NTF4	ITLN2
CFP	OSM	WISP3
PCDH7	PDGFA	MUC2
DKK4	PDGFB	LRG1
IGDCC4	PDGFC	S100P
LY9	PDGFD	SERPINF1
PRSS50	PGF	VWDE
CNTN6	PIK3IP1	BMP4
GP6	PRL	S100A4
LRRC15	PSPN	CSPG4
EGFEM1P	RPTN	WNT7A
LILRA4	S100A2	SERPINE2
CD96	S100A3	EMID1
PIGR	S100A7A	CTSA
HAVCR1	S100A7L2	HMCN2
PRSS36	S100G	WNT7B
IL21R	SFRP4	ADAM33
ITGB6	SFRP5	PCOLCE
ITGA10	TCHHL1	CCBE1
PTPRF	TGFA	CHAD
CHIT1	TGFB3	CSPG5
DSCAM	THPO	S100B
CPZ	TNF	MMP15
DKK1	TNFSF10	SEMA4G
ADGRB3	TNFSF11	HGFAC
KLKB1	TNFSF12	PXDN
FSTL4	TNFSF13B	MUC4
IGSF9	TNFSF14	EPYC
STS	TNFSF15	CHRD
TMPRSS11B	TNFSF18	SERPINA6
PSG11	TNFSF4	HAPLN4
KLK14	TNFSF8	FCN1
SMG8	TNFSF9	SERPINH1
CDH22	VEGFA	TGM5
KIR2DS2	VEGFB	VTN
PRSS43	WFIKKN1	LGALS1
KIR3DL3	WFIKKN2	TGM4
SIGLEC12	XCL1	KERA
KIR3DL2	XCL2	BCAN
CDHR3	ZFP91	PLXND1
DMKN		HAPLN1
LILRA3		ADAMTS1
ITGB1		CXCL3
SARAF		F10
CD180		CELA3A
CTRB2		CTSV
CD300LG		PAPPA
ROBO2		NYX
CNTN4		OIT3
NRROS		PLAT
CDH4		SEMA5A
DDR1		TINAG
TMPRSS11E		LAMB3
CNTN1		SERPINB10
PRSS54		LGALS8
HEPHL1		SERPINB1
NFASC		ADAM21
KIR2DL4		FREM1
CFHR3		COL17A1
CD320		NCAN
TMPRSS3		ELANE
PRSS27		PLG
ARSF		ASPN
TREML2		ACAN
KLK10		A2M
KLK11		CD109
CP		PF4
TPSG1		HRNR
CEACAM19		ADAM11
L1CAM		ADAM28
PTGFRN		LGI1
KIR2DS5		SERPINB5
IGSF11		ZP3
PCDHAC1		MUC17
CEL		INHBE
F11		SERPINB12
FLRT3		RELN
LILRA6		IGSF10
ARSB		HPSE
CPVL		FMOD
DSG1		LGALS4
KIR2DL1		CST3
NRCAM		CILP
CD6		OPTC
FLRT2		RSPO4
PCDH11Y		ADAM23
PLA2R1		PF4V1
CDH1		TGFB1
KIR2DL3		SERPINA1
SIGLEC8		PRELP
PCDH11X		CTSZ
GZMA		FGL1
KIR2DL2		HRG
OMG		S100A9
LRP5		CBLN4
KIR2DL5B		INHBC
PCDH9		ADAM7
CRISP2		PZP
NETO2		SERPINB9
KIRREL1		CPN2
PSG5		CXCL1
CD300C		CTSH
LILRA2		LGALS2
RTN4RL2		PRG3
BTNL3		HTRA3
FAP		CTGF
SIRPA		EGFL6
DSC2		AGT
CDH11		TMPRSS15
PCDHGB7		SEMA4F
CDH24		PLXNB2
LRRC55		HTRA1
DPP4		OMD
LRIG1		LGALS9
PCDH19		VWA2
CHL1		ADAMTS19
PSG2		S100A11
LRRC4C		MATN4
CD22		ADAM32
DDOST		PXDNL
NXPH3		CTSK
DGCR2		CLEC3A
FURIN		LGALS7
C17orf99		ADAM18
SMPD3		SPON1
RTN4RL1		ADAM30
LMAN2		ITIH1
DSC1		CXCL13
ESAM		MMP27
PLPPR4		PRSS3
TNFRSF21		SMOC1
SIGLEC9		MFGE8
INSR		MMP17
IL9R		BMP8B
SUSD4		IGFBP6
SORT1		CTSS
DSG3		MUC5AC
PRLR		MUC13
OPCML		HSPC159
KLK1		CHADL
KLK6		ANXA4
NPHS1		CST6
NEU3		CTSD
FAS		C1QTNF2
CD40		NTN1
MST1R		TGFBI
KIR3DL1		HAPLN2
CUZD1		ANXA7
IL23R		HPSE2
IL13RA1		CBLN1
TMPRSS11F		MMP7
FCRL3		WNT10B
PRSS41		SERPINB4
GAS1		KAZALD1
HAVCR2		CTSG
PCDHGC3		MATN1
LRIG3		FLG2
PCDH10		CLEC3B
TNFRSF10B		CRELD2
VSIG1		LGI4
ISLR		ADAM29
GHR		VWA1
SIGLEC5		ANXA11
FETUB		SBSPON
DCHS1		MMP21
FCRLA		CTSB
NLGN3		S100A8
SLC3A1		LEFTY1
CEACAM18		F13A1
DKK2		SEMA6A
HLA-DRB1		TGM2
KIR2DL5A		GLDN
A1BG		CTSL
TNFRSF10C		PRG2
CTBS		S100A10
LRP4		PCSK6
C4BPB		MUC16
PCDH17		OGN
SIGLEC11		ITIH6
KIR2DS1		LAMC2
TNFRSF10D		CXCL12
IGSF1		CCL19
CDH7		WNT1
NLGN4Y		LOXL1
CA11		SERPINB3
KREMEN1		SLPI
CMA1		SDC3
LAIR2		ANGPTL7
IL2RB		ADAMTSL3
RAET1G		HTRA4
ICAM3		DSPP
PRTG		ZP2
TLR8		TIMP3
GNS		IL17D
SUSD5		BMP3
ARSJ		CST1
HLA-DRB3		TGM1
PSG1		SERPINC1
TDGF1P3		TIMP1
F3		FGG
ITGA2		MUC1
KIR3DS1		CCL21
IL18RAP		IGFBP5
GZMB		ANXA3
LRRTM1		HGF
ZAN		FRZB
CD200R1		LEFTY2
LYPD5		CRISPLD1
FCGR2A		CLEC14A
TNFRSF4		ANXA2
GLIPR1L1		S100A16
CDH15		PPBP
DDR2		S100A6
IFNAR1		MDK
NEGR1		LGALS9B
IGKV1D-12		PLXNC1
VSIG10L2		SEMA6B
DNASE2		WNT9B
PRTN3		WNT2
ARSE		FLG
IL10RA		SFTPA1
SSC5D		SPON2
TNFRSF9		TNFSF13
NCR2		TECTB
FCRLB		FREM3
NOTUM		CCL28
OC90		ANXA5
SIGLEC10		CXCL14
ILDR2		AMELX
MUC3B		ITLN1
CDH23		SERPIND1
LINGO1		OVGP1
VSIG8		MUC20
IFNGR1		SPOCK1
MXRA8		ITIH4
ACP7		SFRP2
CDH12		VWA5B2
GZMM		SERPINB11
CDH2		FNDC1
CDHR5		WNT3
IL2RG		PLAU
NEU1		TIMP2
CDH3		FGF1
PSG8		S100A13
C5		EMILIN1
SPINT1		MMP23B
WFDC8		CLC
PSG3		VCAN
PSG7		ANXA1
IL10RB		ZP4
TMPRSS12		SERPINA9
PRSS55		ANGPTL4
LRIG2		LOX
FCRL2		SERPING1
RTN4R		FGB
LRFN1		SHH
LRP6		AMELY
ITGAM		GDF7
FLRT1		BMP7
VASN		COCH
SIRPG		S100A7
FGFRL1		C1QTNF9
PSG6		SERPINA7
FCRL4		C1QL1
IGSF3		LAMA4
EFNB1		S100A14
PRSS37		TPO
PCDHA13		CLEC18C
MDGA1		TGFB2
PRSS57		PRSS2
R3HDML		FGL2
PSG4		SPOCK3
PCDHGB5		VWC2L
KIR2DS4		IL16
ERVS71-1		POSTN
SIGLEC7		SULF2
CDH26		ITIH5
PCDHB1		SERPINF2
PCDH8		FSTL3
PCDHGB4		WNT4
IGHG2		WNT3A
IL7R		WNT16
SIRPB1		FGF9
KLRB1		CRNN
LRRC4B		ELN
CHODL		IBSP
EFNA4		LGALS3
RCC1		MEGF9
CD244		FGF2
IGSF8		CTSF
OVOS1		ITIH2
CD69		MST1L
CADM2		PLXNA4
LRRC32		C1QTNF3
LILRA5		PLOD3
DSC3		GDF15
PCDHGB6		NRG2
NCR1		SDC2
IGHE		FAM20C
CEACAM5		INHBA
RNF43		SERPINB13
FSCN3		GPC4
LRTM2		SPOCK2
UMODL1		IL12B
KLK3		C17orf58
PCDHA10		AMBN
MANBA		SEMA3A
CNTFR		SMOC2
CEACAM6		ANXA6
CSF2RB		CXCL2
PCDHGB2		ASTL
FOLH1		TGM7
MDGA2		C1QTNF9B
LRRTM2		GREM1
TREML4		MFAP3
CD68		CSTA
CYB5D2		SLIT3
TFPI2		HCFC2
NLGN2		DPT
PCDHAC2		LMAN1
PCDHA7		PTN
ADAM5		ITIH3
ERBB4		EGFL8
THSD1		PLXNA2
IGKV1-33		SFRP1
KIR2DS3		GPC6
GRIN2D		ANGPTL6
IGHD		SFTPA2
IGHG4		CFC1B
IGKV1D-33		WNT8A
NECTIN1		MGP
PCDHA9		COLEC10
ITGA6		SLIT2
DPP9		ANGPTL2
IGSF21		FST
KIAA1324L		GPC1
PPIF		FGA
TLR7		MUC3A
ROBO4		NRG3
VSTM2A		C1QTNF8
CDHR4		REG1B
TNS3		WNT8B
IGKV4-1		PLXNA1
PCDHB3		PLXDC2
LRFN3		C1QTNF7
FCAR		ABI3BP
IGDCC3		CSTB
LILRB4		FNDC7
IDS		CTSW
LRRN4		CTHRC1
CDH10		SLIT1
EPOR		KNG1
CEACAM7		REG3G
KIRREL3		SULF1
CDH17		FCN2
PCDHB12		WIF1
FAM189A1		ADAM17
TNFRSF19		SERPINB7
SLITRK1		SPARC
ZDHHC8		MFAP5
LCT		BMP2
BTNL8		MUC19
IGKV1-39		REG3A
LRIT3		FGFBP2
OVOS2		COLEC12
LRRC4		PRG4
IL5RA		S100A5
EFNA3		CDCP2
TMEM123		VEGFC
GP1BA		MEP1A
MCAM		MMRN1
TRIL		IGFBPL1
IL20RA		IGFBP4
PCDHGA3		MFAP2
CEACAM1		DMP1
IGKV6D-21		ECM2
IGHG1		IMPG2
ARSG		CXCL5
ASPHD2		ESM1
IGF1R		PLXNB3
EDA2R		C1QTNF6
FCRL1		EMILIN2
SIGLEC6		CCL1
IL2RA		CLEC11A
ERLEC1		LEPRE1
PRSS42		HHIP
IGKV2D-28		SPARCL1
AMIGO2		SPP1
SLAMF1		NDNF
LYZL4		BMP15
GP5		FGF10
PRSS45		INHBB
WFDC1		EMILIN3
AMY1A		MMRN2
FBXO10		CST5
CD48		LGALS9C
VSIG2		PLXNA3
ICAM5		FNDC8
MANSC1		CCL11
IGKV1D-39		MEP1B
SORCS1		SEMA3E
IGKV1D-17		PLXNB1
ARSA		CCL2
SIRPD		BMP10
PCDHGB1		VWC2
SIGLEC1		LTA
PCDHA6		ZPLD1
ROBO1		EBI3
IGKV6-21		LGALS12
LECT2		CFC1
CD276		FGF20
TNFRSF10A		SERPINA10
PCDHA5		SERPINA12
NCAM1		GDF11
MET		SERPINA2
BCAM		CLEC9A
FCRL5		MMP26
REELD1		AEBP1
HEPACAM2		ECM1
HEG1		TDGF1
PCDHGA5		CST4
SLAMF7		P4HA2
C8A		ISM1
PCDHGC4		GDF2
NPTN		CXCL8
IL3RA		RSPO1
IGKV1-12		CCL13
IGKV1-5		CST2
CD164L2		CCL8
IGHM		ELFN2
PSG9		ELFN1
LYPD3		CCL5
CEACAM4		REG1A
PCDHGA1		FGF5
ENPP1		CPAMD8
PDCD1		MFAP1
UNC5C		CCL18
FCGR3B		S100Z
RAG2		MSTN
ILDR1		NODAL
PRSS47		IMPG1
IGKV2-28		MEPE
BCHE		TCHH
CHI3L2
IGKV5-2
CRISP1
CHIA
CPD
DPP6
IGHV5-51
TARM1
C3orf80
AMY2A
EPHA6
CD101
P2RX7
IGHV3-15
SI
SLAMF6
KIAA1324
ANTXR2
IL1RL2
CPA4
LRP11
HPR
LTK
MICA
FCRL6
IL22RA2
FCMR
TLR9
LRFN5
LRFN2
ZG16
PTPRG
WFDC2
IGKV3-11
VNN2
CSF2RA
WBP1L
ITGAD
NEU2
SUMF1
CLEC20A
CDH18
NTM
IGKV2-30
IGKV1-9
PCDH18
ITGA11
IGKV3D-11
APCDD1L
ITGA5
LINGO2
EPHA5
TMEM25
LAMP2
LDLRAD4
CD300LD
IGKV1D-43
IGHV5-10-1
IGKV1-17
PCDH20
CDHR2
IGLV5-52
PCDHGA9
WSCD1

## Sheet: Fig. 3B
Core matrisome	Associated matrisome	ECMPride	Core matrisome|ECMPride	Associated matrisome|ECMPride
BGLAP	ANXA10	DLL4	ABI3BP	ANXA1
BSPH1	ANXA13	STAB1	ADIPOQ	ANXA11
DDX26B	ANXA8	JAG1	AEBP1	ANXA2
ELSPBP1	ANXA8L1	FCGBP	AGRN	ANXA3
IGFBP1	ANXA9	JAG2	AMBN	ANXA4
IGFBP2	C1QTNF1	USH2A	AMELX	ANXA5
IGFBP3	C1QTNF4	LRP1	AMELY	ANXA6
LGI2	CD209	STAB2	BMPER	ANXA7
LGI3	CLEC10A	CRB1	CDCP2	C1QA
POMZP3	CLEC12A	CNTNAP3B	CILP	C1QB
RSPO2	CLEC12B	CNTNAP3	CILP2	C1QC
RSPO3	CLEC17A	NOTCH1	COCH	C1QL1
TNFAIP6	CLEC19A	CNTNAP4	COLQ	C1QL2
TSPEAR	CLEC1A	DLL3	COMP	C1QL3
VWA3A	CLEC1B	NOTCH2	CRELD1	C1QL4
VWA3B	CLEC2A	CNTNAP5	CRELD2	C1QTNF2
VWA5A	CLEC2B	NOTCH3	CRIM1	C1QTNF3
VWA5B1	CLEC2D	DLK1	CRISPLD1	C1QTNF5
VWA7	CLEC2L	PEAR1	CRISPLD2	C1QTNF6
VWA9	CLEC4A	DNER	CTGF	C1QTNF7
SRGN	CLEC4C	OTOGL	CTHRC1	C1QTNF8
	CLEC4D	CNTNAP2	CYR61	C1QTNF9
	CLEC4E	LRP1B	DMBT1	CLC
	CLEC4F	CSMD3	DMP1	CLEC11A
	CLEC4G	CORIN	DPT	CLEC14A
	CLEC4M	ATRN	DSPP	CLEC18A
	CLEC5A	CNTNAP1	ECM1	CLEC18B
	CLEC6A	CD163L1	ECM2	CLEC18C
	CLEC7A	NOTCH4	EDIL3	CLEC3A
	EMCN	DLL1	EFEMP1	CLEC3B
	GPC2	CSMD1	EFEMP2	CLEC9A
	GPC3	SUSD2	EGFLAM	COLEC10
	GPC5	HHIPL1	ELN	COLEC11
	GRIFIN	SELE	EMID1	COLEC12
	LGALS13	LRP2	EMILIN1	CSPG4
	LGALS14	MAMDC4	EMILIN2	CSPG5
	LGALS16	C1S	EMILIN3	ELFN1
	LMAN1L	SUSD1	EYS	ELFN2
	MUC12	MALRD1	FBLN1	FCN1
	MUC15	C1RL	FBLN2	FCN2
	MUC21	CFHR5	FBLN5	FCN3
	MUC22	CFHR4	FBLN7	FREM1
	MUC7	CSMD2	FBN1	FREM2
	MUC8	THSD7A	FBN2	FREM3
	MUCL1	CD163	FBN3	GPC1
	PARM1	NRP1	FGA	GPC4
	PLXDC1	CRB2	FGB	GPC6
	PROL1	ITGB4	FGG	GREM1
	REG4	ATRNL1	FGL1	HPX
	SDC1	C4BPA	FGL2	HSPC159
	SDC4	SEZ6L2	FN1	ITLN1
	SEMA3D	VLDLR	FNDC1	ITLN2
	SFTA2	FNDC3A	FNDC7	LGALS1
	SFTA3	CD93	FNDC8	LGALS12
	SFTPB	CR1L	FRAS1	LGALS2
	SFTPC	FNDC3B	GAS6	LGALS3
	CST11	C2	GLDN	LGALS4
	CST7	LRP12	HMCN1	LGALS7
	CST8	UMOD	HMCN2	LGALS8
	CST9	ITGBL1	IBSP	LGALS9
	CST9L	NOTCH2NL	IGFALS	LGALS9B
	CSTL1	KLK13	IGFBP4	LGALS9C
	CTSE	LRP10	IGFBP5	LMAN1
	CTSO	MRC2	IGFBP6	MBL2
	EGLN1	THBD	IGFBP7	MUC1
	EGLN2	THSD7B	IGFBPL1	MUC13
	EGLN3	CFH	IGSF10	MUC16
	FAM20A	C1R	KAL1	MUC17
	FAM20B	TMPRSS6	KCP	MUC19
	HMSD	SSC4D	LAMA1	MUC2
	HYAL1	CR2	LAMA2	MUC20
	HYAL2	LRP8	LAMA3	MUC3A
	HYAL3	CR1	LAMA4	MUC4
	HYAL4	LRP3	LAMA5	MUC5AC
	KY	TMPRSS2	LAMB1	MUC5B
	LEPREL1	NRXN3	LAMB2	MUC6
	LEPREL2	CELSR3	LAMB3	OVGP1
	NGLY1	NAGPA	LAMB4	PLXDC2
	OGFOD1	KLK8	LAMC1	PLXNA1
	OGFOD2	TMPRSS9	LAMC2	PLXNA2
	P4HA1	TENM4	LAMC3	PLXNA3
	P4HA3	CTRC	LGI1	PLXNA4
	P4HTM	CFB	LGI4	PLXNB1
	PAPPA2	TENM1	LRG1	PLXNB2
	PI3	CUBN	LTBP1	PLXNB3
	PLOD1	CD248	LTBP2	PLXNC1
	PLOD2	GRN	LTBP3	PLXND1
	SERPINB2	OVCH2	LTBP4	REG1A
	SERPINE3	SELP	MATN1	REG1B
	SERPINI1	CD5L	MATN2	REG3A
	SERPINI2	TENM2	MATN3	REG3G
	SPAM1	PTPRS	MATN4	SDC2
	TGM6	PTPRJ	MEPE	SDC3
	TIMP4	OVCH1	MFAP1	SEMA3A
	AMH	TENM3	MFAP2	SEMA3B
	ANGPT1	APOH	MFAP3	SEMA3C
	ANGPT2	PROZ	MFAP4	SEMA3E
	ANGPT4	PTPRH	MFAP5	SEMA3F
	ANGPTL1	CD55	MFGE8	SEMA3G
	ANGPTL3	SCARF2	MGP	SEMA4A
	ANGPTL5	TMPRSS7	MMRN1	SEMA4B
	AREG	LIFR	MMRN2	SEMA4C
	ARTN	PRSS33	MXRA5	SEMA4D
	BDNF	CELSR1	NDNF	SEMA4F
	BMP5	SDK1	NELL1	SEMA4G
	BMP6	NRXN1	NELL2	SEMA5A
	BRINP2	MPL	NID1	SEMA5B
	BRINP3	ITGB8	NID2	SEMA6A
	BTC	TPSAB1	NOV	SEMA6B
	CBLN2	TPSB2	NPNT	SEMA6C
	CBLN3	CFHR2	NTN1	SEMA6D
	CCL14	TNFRSF8	NTN3	SEMA7A
	CCL15	CELSR2	NTN4	SFTPA1
	CCL16	ADGRB2	NTN5	SFTPA2
	CCL17	ITGB5	NTNG1	SFTPD
	CCL20	TNFRSF1B	NTNG2	A2M
	CCL22	CFI	OIT3	A2ML1
	CCL23	TNFRSF1A	OTOG	ADAM10
	CCL24	GPNMB	OTOL1	ADAM11
	CCL25	HP	PAPLN	ADAM12
	CCL26	ADGRB1	PCOLCE	ADAM15
	CCL27	IL27RA	PCOLCE2	ADAM17
	CCL3	CSF3R	POSTN	ADAM18
	CCL3L3	NRP2	PXDN	ADAM19
	CCL4	IL6R	PXDNL	ADAM2
	CCL4L1	TMEFF2	RELN	ADAM20
	CCL4L2	GZMH	RSPO1	ADAM21
	CCL7	TMPRSS5	RSPO4	ADAM22
	CLCF1	PTPRT	SBSPON	ADAM23
	CNTF	NRXN2	SLIT1	ADAM28
	CRHBP	GZMK	SLIT2	ADAM29
	CRLF3	FAT4	SLIT3	ADAM30
	CSF1	TIE1	SMOC1	ADAM32
	CSF2	LDLR	SMOC2	ADAM33
	CSF3	TMEFF1	SNED1	ADAM7
	CSH1	SORL1	SPARC	ADAM8
	CSH2	CNTN5	SPARCL1	ADAM9
	CSHL1	PTPRB	SPON1	ADAMDEC1
	CTF1	CDON	SPON2	ADAMTS1
	CX3CL1	IL12RB2	SPP1	ADAMTS10
	CXCL10	ITGB3	SRPX	ADAMTS12
	CXCL11	KLK15	SRPX2	ADAMTS13
	CXCL6	PROS1	SSPO	ADAMTS14
	CXCL9	CTRL	SVEP1	ADAMTS15
	DHH	TNFRSF11A	TECTA	ADAMTS16
	EDA	CEMIP	TECTB	ADAMTS17
	EPGN	CRISP3	TGFBI	ADAMTS18
	EPO	TMPRSS11D	THBS1	ADAMTS19
	EREG	PRSS23	THBS2	ADAMTS2
	FASLG	PRSS22	THBS3	ADAMTS20
	FGF11	HPN	THBS4	ADAMTS3
	FGF12	UNC5B	THSD4	ADAMTS4
	FGF13	LDLRAD3	TINAG	ADAMTS5
	FGF14	SEZ6	TINAGL1	ADAMTS6
	FGF16	LILRB2	TNC	ADAMTS7
	FGF17	KLK12	TNN	ADAMTS8
	FGF18	C7	TNR	ADAMTS9
	FGF19	ARSH	TNXB	ADAMTSL1
	FGF21	CD5	TSKU	ADAMTSL2
	FGF22	KIAA0319L	VIT	ADAMTSL3
	FGF23	FAT3	VTN	ADAMTSL4
	FGF3	CPXM1	VWA1	ADAMTSL5
	FGF4	DCC	VWA2	AGT
	FGF6	IL6ST	VWA5B2	AMBP
	FGF7	CD46	VWCE	ASTL
	FGF8	RELT	VWDE	BMP1
	FGFBP1	NECTIN3	VWF	C17orf58
	FGFBP3	NETO1	WISP1	CD109
	FIGF	TYRP1	WISP2	CELA1
	FLT3LG	OSMR	WISP3	CELA2A
	FSTL1	CNTN2	ZP1	CELA2B
	GDF1	DCBLD1	ZP2	CELA3A
	GDF3	PRSS44	ZP3	CELA3B
	GDF5	LILRB1	ZP4	CPAMD8
	GDF6	CNTN3	ZPLD1	CPN2
	GDF9	LILRB5	COL10A1	CST1
	GDNF	PRSS8	COL11A1	CST2
	GH1	IL31RA	COL11A2	CST3
	GH2	UNC5D	COL12A1	CST4
	HBEGF	GALNS	COL13A1	CST5
	IFNA1	KREMEN2	COL14A1	CST6
	IFNA10	PTPRQ	COL15A1	CSTA
	IFNA13	DCBLD2	COL16A1	CSTB
	IFNA14	CFHR1	COL17A1	CTSA
	IFNA16	SIRPB2	COL18A1	CTSB
	IFNA17	LTBR	COL19A1	CTSC
	IFNA2	HHIPL2	COL1A1	CTSD
	IFNA21	IL12RB1	COL1A2	CTSF
	IFNA4	NGFR	COL20A1	CTSG
	IFNA5	PRSS3P2	COL21A1	CTSH
	IFNA6	ITGB2	COL22A1	CTSK
	IFNA7	DLK2	COL23A1	CTSL
	IFNA8	TNFRSF25	COL24A1	CTSS
	IFNB1	PCSK4	COL25A1	CTSV
	IFNE	KIR3DX1	COL26A1	CTSW
	IFNG	INSRR	COL27A1	CTSZ
	IFNK	PRSS29P	COL28A1	ELANE
	IFNW1	TYR	COL2A1	F10
	IGF1	DCT	COL3A1	F12
	IGF2	VSIG10L	COL4A1	F13A1
	IHH	KLK7	COL4A2	F13B
	IL10	IL11RA	COL4A3	F2
	IL11	MRC1	COL4A4	F7
	IL12A	LDLRAD2	COL4A5	F9
	IL13	PKHD1	COL4A6	FAM20C
	IL15	CD27	COL5A1	HABP2
	IL17A	CA10	COL5A2	HPSE
	IL17B	PRSS53	COL5A3	HPSE2
	IL17C	PTPRK	COL6A1	HRG
	IL17F	PROC	COL6A2	HTRA1
	IL18	LRRC70	COL6A3	HTRA3
	IL19	LEPR	COL6A5	HTRA4
	IL1A	TNFRSF6B	COL6A6	ITIH1
	IL1B	ICAM1	COL7A1	ITIH2
	IL1F10	ANTXRL	COL8A1	ITIH3
	IL1F5	WFDC3	COL8A2	ITIH4
	IL1F6	ITGAL	COL9A1	ITIH5
	IL1F7	PTPRM	COL9A2	ITIH6
	IL1F8	KLK4	COL9A3	KAZALD1
	IL1F9	ROBO3	ACAN	KNG1
	IL1RN	TEK	ASPN	LEPRE1
	IL2	CRTAC1	BCAN	LOX
	IL20	VSIG4	BGN	LOXL1
	IL22	UNC5A	CHAD	LOXL2
	IL23A	TMPRSS11A	CHADL	LOXL3
	IL24	IGHA1	DCN	LOXL4
	IL25	LILRA1	EPYC	LPA
	IL26	ACR	ESM1	MASP1
	IL3	SCARF1	FMOD	MASP2
	IL34	TMPRSS4	HAPLN1	MEP1A
	IL4	LDLRAD1	HAPLN2	MEP1B
	IL5	KLK9	HAPLN3	MMP1
	IL6	ITGAX	HAPLN4	MMP10
	IL7	MFRP	HSPG2	MMP11
	IL9	PTPRU	IMPG1	MMP12
	INHA	TNFRSF14	IMPG2	MMP13
	INS	PTPRD	KERA	MMP14
	INS-IGF2	LILRB3	LUM	MMP15
	INSL3	CTRB1	NCAN	MMP16
	INSL5	ITGA1	NYX	MMP17
	INSL6	ITGB7	OGN	MMP19
	ISM2	SDK2	OMD	MMP2
	KITLG	ARSD	OPTC	MMP20
	LEP	FAT1	PODN	MMP21
	LIF	PCDH1	PODNL1	MMP23B
	LTB	LAG3	PRELP	MMP24
	NGF	IGSF9B	PRG2	MMP25
	NRG1	DSCAML1	PRG3	MMP26
	NRG4	C6	PRG4	MMP27
	NRTN	PCDH15	SPOCK1	MMP28
	NTF3	OSCAR	SPOCK2	MMP3
	NTF4	PTPRO	SPOCK3	MMP7
	OSM	PMEL	VCAN	MMP8
	PDGFA	CD33		MMP9
	PDGFB	FAT2		P4HA2
	PDGFC	BOC		PAMR1
	PDGFD	KLK5		PAPPA
	PGF	TPSD1		PCSK5
	PIK3IP1	NLGN1		PCSK6
	PRL	KIRREL2		PLAT
	PSPN	NEO1		PLAU
	RPTN	KLK2		PLG
	S100A2	AZU1		PLOD3
	S100A3	SGSH		PRSS1
	S100A7A	LY75		PRSS12
	S100A7L2	HEPH		PRSS2
	S100G	PRSS48		PRSS3
	SFRP4	CDSN		PZP
	SFRP5	PKHD1L1		SERPINA1
	TCHHL1	MAMDC2		SERPINA10
	TGFA	PRSS21		SERPINA11
	TGFB3	TMEM2		SERPINA12
	THPO	MARCO		SERPINA2
	TNF	CFP		SERPINA3
	TNFSF10	PCDH7		SERPINA4
	TNFSF11	DKK4		SERPINA5
	TNFSF12	IGDCC4		SERPINA6
	TNFSF13B	LY9		SERPINA7
	TNFSF14	PRSS50		SERPINA9
	TNFSF15	CNTN6		SERPINB1
	TNFSF18	GP6		SERPINB10
	TNFSF4	LRRC15		SERPINB11
	TNFSF8	EGFEM1P		SERPINB12
	TNFSF9	LILRA4		SERPINB13
	VEGFA	CD96		SERPINB3
	VEGFB	PIGR		SERPINB4
	WFIKKN1	HAVCR1		SERPINB5
	WFIKKN2	PRSS36		SERPINB6
	XCL1	IL21R		SERPINB7
	XCL2	ITGB6		SERPINB8
	ZFP91	ITGA10		SERPINB9
		PTPRF		SERPINC1
		CHIT1		SERPIND1
		DSCAM		SERPINE1
		CPZ		SERPINE2
		DKK1		SERPINF1
		ADGRB3		SERPINF2
		KLKB1		SERPING1
		FSTL4		SERPINH1
		IGSF9		SLPI
		STS		ST14
		TMPRSS11B		SULF1
		PSG11		SULF2
		KLK14		TGM1
		SMG8		TGM2
		CDH22		TGM3
		KIR2DS2		TGM4
		PRSS43		TGM5
		KIR3DL3		TGM7
		SIGLEC12		TIMP1
		KIR3DL2		TIMP2
		CDHR3		TIMP3
		DMKN		TLL1
		LILRA3		TLL2
		ITGB1		TMPRSS15
		SARAF		ANGPTL2
		CD180		ANGPTL4
		CTRB2		ANGPTL6
		CD300LG		ANGPTL7
		ROBO2		BMP10
		CNTN4		BMP15
		NRROS		BMP2
		CDH4		BMP3
		DDR1		BMP4
		TMPRSS11E		BMP7
		CNTN1		BMP8A
		PRSS54		BMP8B
		HEPHL1		C1QTNF9B
		NFASC		CBLN1
		KIR2DL4		CBLN4
		CFHR3		CCBE1
		CD320		CCL1
		TMPRSS3		CCL11
		PRSS27		CCL13
		ARSF		CCL18
		TREML2		CCL19
		KLK10		CCL2
		KLK11		CCL21
		CP		CCL28
		TPSG1		CCL5
		CEACAM19		CCL8
		L1CAM		CFC1
		PTGFRN		CFC1B
		KIR2DS5		CHRD
		IGSF11		CHRDL1
		PCDHAC1		CHRDL2
		CEL		CRLF1
		F11		CRNN
		FLRT3		CXCL1
		LILRA6		CXCL12
		ARSB		CXCL13
		CPVL		CXCL14
		DSG1		CXCL2
		KIR2DL1		CXCL3
		NRCAM		CXCL5
		CD6		CXCL8
		FLRT2		EBI3
		PCDH11Y		EGF
		PLA2R1		EGFL6
		CDH1		EGFL7
		KIR2DL3		EGFL8
		SIGLEC8		FGF1
		PCDH11X		FGF10
		GZMA		FGF2
		KIR2DL2		FGF20
		OMG		FGF5
		LRP5		FGF9
		KIR2DL5B		FGFBP2
		PCDH9		FLG
		CRISP2		FLG2
		NETO2		FRZB
		KIRREL1		FST
		PSG5		FSTL3
		CD300C		GDF10
		LILRA2		GDF11
		RTN4RL2		GDF15
		BTNL3		GDF2
		FAP		GDF7
		SIRPA		HCFC1
		DSC2		HCFC2
		CDH11		HGF
		PCDHGB7		HGFAC
		CDH24		HHIP
		LRRC55		HRNR
		DPP4		IL12B
		LRIG1		IL16
		PCDH19		IL17D
		CHL1		INHBA
		PSG2		INHBB
		LRRC4C		INHBC
		CD22		INHBE
		DDOST		ISM1
		NXPH3		LEFTY1
		DGCR2		LEFTY2
		FURIN		LTA
		C17orf99		MDK
		SMPD3		MEGF10
		RTN4RL1		MEGF11
		LMAN2		MEGF6
		DSC1		MEGF8
		ESAM		MEGF9
		PLPPR4		MST1
		TNFRSF21		MST1L
		SIGLEC9		MSTN
		INSR		NODAL
		IL9R		NRG2
		SUSD4		NRG3
		SORT1		PF4
		DSG3		PF4V1
		PRLR		PPBP
		OPCML		PTN
		KLK1		S100A1
		KLK6		S100A10
		NPHS1		S100A11
		NEU3		S100A12
		FAS		S100A13
		CD40		S100A14
		MST1R		S100A16
		KIR3DL1		S100A4
		CUZD1		S100A5
		IL23R		S100A6
		IL13RA1		S100A7
		TMPRSS11F		S100A8
		FCRL3		S100A9
		PRSS41		S100B
		GAS1		S100P
		HAVCR2		S100Z
		PCDHGC3		SCUBE1
		LRIG3		SCUBE2
		PCDH10		SCUBE3
		TNFRSF10B		SFRP1
		VSIG1		SFRP2
		ISLR		SHH
		GHR		TCHH
		SIGLEC5		TDGF1
		FETUB		TGFB1
		DCHS1		TGFB2
		FCRLA		TNFSF13
		NLGN3		TPO
		SLC3A1		VEGFC
		CEACAM18		VWC2
		DKK2		VWC2L
		HLA-DRB1		WIF1
		KIR2DL5A		WNT1
		A1BG		WNT10A
		TNFRSF10C		WNT10B
		CTBS		WNT11
		LRP4		WNT16
		C4BPB		WNT2
		PCDH17		WNT2B
		SIGLEC11		WNT3
		KIR2DS1		WNT3A
		TNFRSF10D		WNT4
		IGSF1		WNT5A
		CDH7		WNT5B
		NLGN4Y		WNT6
		CA11		WNT7A
		KREMEN1		WNT7B
		CMA1		WNT8A
		LAIR2		WNT8B
		IL2RB		WNT9A
		RAET1G		WNT9B
		ICAM3
		PRTG
		TLR8
		GNS
		SUSD5
		ARSJ
		HLA-DRB3
		PSG1
		TDGF1P3
		F3
		ITGA2
		KIR3DS1
		IL18RAP
		GZMB
		LRRTM1
		ZAN
		CD200R1
		LYPD5
		FCGR2A
		TNFRSF4
		GLIPR1L1
		CDH15
		DDR2
		IFNAR1
		NEGR1
		IGKV1D-12
		VSIG10L2
		DNASE2
		PRTN3
		ARSE
		IL10RA
		SSC5D
		TNFRSF9
		NCR2
		FCRLB
		NOTUM
		OC90
		SIGLEC10
		ILDR2
		MUC3B
		CDH23
		LINGO1
		VSIG8
		IFNGR1
		MXRA8
		ACP7
		CDH12
		GZMM
		CDH2
		CDHR5
		IL2RG
		NEU1
		CDH3
		PSG8
		C5
		SPINT1
		WFDC8
		PSG3
		PSG7
		IL10RB
		TMPRSS12
		PRSS55
		LRIG2
		FCRL2
		RTN4R
		LRFN1
		LRP6
		ITGAM
		FLRT1
		VASN
		SIRPG
		FGFRL1
		PSG6
		FCRL4
		IGSF3
		EFNB1
		PRSS37
		PCDHA13
		MDGA1
		PRSS57
		R3HDML
		PSG4
		PCDHGB5
		KIR2DS4
		ERVS71-1
		SIGLEC7
		CDH26
		PCDHB1
		PCDH8
		PCDHGB4
		IGHG2
		IL7R
		SIRPB1
		KLRB1
		LRRC4B
		CHODL
		EFNA4
		RCC1
		CD244
		IGSF8
		OVOS1
		CD69
		CADM2
		LRRC32
		LILRA5
		DSC3
		PCDHGB6
		NCR1
		IGHE
		CEACAM5
		RNF43
		FSCN3
		LRTM2
		UMODL1
		KLK3
		PCDHA10
		MANBA
		CNTFR
		CEACAM6
		CSF2RB
		PCDHGB2
		FOLH1
		MDGA2
		LRRTM2
		TREML4
		CD68
		CYB5D2
		TFPI2
		NLGN2
		PCDHAC2
		PCDHA7
		ADAM5
		ERBB4
		THSD1
		IGKV1-33
		KIR2DS3
		GRIN2D
		IGHD
		IGHG4
		IGKV1D-33
		NECTIN1
		PCDHA9
		ITGA6
		DPP9
		IGSF21
		KIAA1324L
		PPIF
		TLR7
		ROBO4
		VSTM2A
		CDHR4
		TNS3
		IGKV4-1
		PCDHB3
		LRFN3
		FCAR
		IGDCC3
		LILRB4
		IDS
		LRRN4
		CDH10
		EPOR
		CEACAM7
		KIRREL3
		CDH17
		PCDHB12
		FAM189A1
		TNFRSF19
		SLITRK1
		ZDHHC8
		LCT
		BTNL8
		IGKV1-39
		LRIT3
		OVOS2
		LRRC4
		IL5RA
		EFNA3
		TMEM123
		GP1BA
		MCAM
		TRIL
		IL20RA
		PCDHGA3
		CEACAM1
		IGKV6D-21
		IGHG1
		ARSG
		ASPHD2
		IGF1R
		EDA2R
		FCRL1
		SIGLEC6
		IL2RA
		ERLEC1
		PRSS42
		IGKV2D-28
		AMIGO2
		SLAMF1
		LYZL4
		GP5
		PRSS45
		WFDC1
		AMY1A
		FBXO10
		CD48
		VSIG2
		ICAM5
		MANSC1
		IGKV1D-39
		SORCS1
		IGKV1D-17
		ARSA
		SIRPD
		PCDHGB1
		SIGLEC1
		PCDHA6
		ROBO1
		IGKV6-21
		LECT2
		CD276
		TNFRSF10A
		PCDHA5
		NCAM1
		MET
		BCAM
		FCRL5
		REELD1
		HEPACAM2
		HEG1
		PCDHGA5
		SLAMF7
		C8A
		PCDHGC4
		NPTN
		IL3RA
		IGKV1-12
		IGKV1-5
		CD164L2
		IGHM
		PSG9
		LYPD3
		CEACAM4
		PCDHGA1
		ENPP1
		PDCD1
		UNC5C
		FCGR3B
		RAG2
		ILDR1
		PRSS47
		IGKV2-28
		BCHE
		CHI3L2
		IGKV5-2
		CRISP1
		CHIA
		CPD
		DPP6
		IGHV5-51
		TARM1
		C3orf80
		AMY2A
		EPHA6
		CD101
		P2RX7
		IGHV3-15
		SI
		SLAMF6
		KIAA1324
		ANTXR2
		IL1RL2
		CPA4
		LRP11
		HPR
		LTK
		MICA
		FCRL6
		IL22RA2
		FCMR
		TLR9
		LRFN5
		LRFN2
		ZG16
		PTPRG
		WFDC2
		IGKV3-11
		VNN2
		CSF2RA
		WBP1L
		ITGAD
		NEU2
		SUMF1
		CLEC20A
		CDH18
		NTM
		IGKV2-30
		IGKV1-9
		PCDH18
		ITGA11
		IGKV3D-11
		APCDD1L
		ITGA5
		LINGO2
		EPHA5
		TMEM25
		LAMP2
		LDLRAD4
		CD300LD
		IGKV1D-43
		IGHV5-10-1
		IGKV1-17
		PCDH20
		CDHR2
		IGLV5-52
		PCDHGA9
		WSCD1

## Sheet: Fig. 3C
ECMPride	Matrisome	ECM proteomics dataset	ECMPride|Matrisome	ECMPride|ECM proteomics dataset	Matrisome|ECM proteomics dataset	ECMPride|Matrisome|ECM proteomics dataset
DLL4	BGLAP	ACTA2	SVEP1	STAB1	IGFBP2	COL11A2
JAG1	BSPH1	ACTB	SNED1	LRP1	ANXA8	COL5A1
FCGBP	DDX26B	ACTBL2	ADAMTS10	CNTNAP4	ANXA9	COL5A3
JAG2	ELSPBP1	AHNAK	THBS3	SUSD2	LMAN1L	COL5A2
USH2A	IGFBP1	ALB	CRIM1	C1S	SDC1	VWF
STAB2	IGFBP3	ALDOA	TECTA	CD163	LEPREL2	COL2A1
CRB1	LGI2	ARMC5	ADAMTS17	NRP1	P4HA1	THBS1
CNTNAP3B	LGI3	ATP5A1	ADAMTS12	ITGB4	PLOD1	COL4A4
CNTNAP3	POMZP3	C3	FBLN7	C4BPA	PLOD2	NID1
NOTCH1	RSPO2	DPYSL5	BMPER	FNDC3A	ARTN	AGRN
DLL3	RSPO3	EEF1A1	NTN4	C2	IFNA2	THBS4
NOTCH2	TNFAIP6	EXOSC1	SSPO	ITGBL1	IL7	FBN2
CNTNAP5	TSPEAR	FLNA	LAMB4	MRC2	SFRP4	COL4A3
NOTCH3	VWA3A	GAPDH	ADAMTS20	CFH		COL3A1
DLK1	VWA3B	GSN	MEGF8	C1R		TNC
PEAR1	VWA5A	H1F0	ADAM9	CFB		HSPG2
DNER	VWA5B1	H2AFY	PRSS12	GRN		COL1A2
OTOGL	VWA7	HBA1	NTN3	CD5L		COL4A2
CNTNAP2	VWA9	HBB	MASP2	TENM3		FBN3
LRP1B	SRGN	HIST1H1C	FRAS1	APOH		COL4A6
CSMD3	ANXA10	HIST1H2AH	TNR	CD55		FBN1
CORIN	ANXA13	HIST1H2BL	EGF	TPSAB1		EFEMP2
ATRN	ANXA8L1	HIST1H3A	KCP	CFHR2		LTBP4
CNTNAP1	C1QTNF1	HIST1H4A	CHRDL2	ITGB5		FBLN1
CD163L1	C1QTNF4	HSPA8	ADAM12	CFI		COL1A1
NOTCH4	CD209	HSPD1	MMP12	GPNMB		MEGF6
DLL1	CLEC10A	IGKC	ADAMTS16	HP		COL11A1
CSMD1	CLEC12A	IGLC2	MMP20	NRP2		COL16A1
HHIPL1	CLEC12B	KRT5	ST14	GZMH		FBLN2
SELE	CLEC17A	KRT7	MMP16	IL12RB2		COL22A1
LRP2	CLEC19A	KRT8	F7	ITGB3		CRELD1
MAMDC4	CLEC1A	LMNA	MEGF10	PROS1		FN1
SUSD1	CLEC1B	MYH11	CHRDL1	C7		COL24A1
MALRD1	CLEC2A	MYH9	ADAMTS8	CPXM1		LAMB2
C1RL	CLEC2B	NPM1	OTOG	CFHR1		NPNT
CFHR5	CLEC2D	PIP	MMP14	ITGB2		COL19A1
CFHR4	CLEC2L	PKM	LAMA1	MRC1		LTBP3
CSMD2	CLEC4A	PRDX1	ADAMTS9	ICAM1		TNXB
THSD7A	CLEC4C	PTRF	ADAMTS3	ANTXRL		COL7A1
CRB2	CLEC4D	RPLP2	MMP3	IGHA1		COL4A1
ATRNL1	CLEC4E	TPM1	ADAMTS4	MFRP		EFEMP1
SEZ6L2	CLEC4F	TPM4	MEGF11	ITGA1		THBS2
VLDLR	CLEC4G	TUBA1A	F12	DSCAML1		NID2
CD93	CLEC4M	TUBB	ADAMTS5	C6		COL12A1
CR1L	CLEC5A	UBC	ADAMTS13	PTPRO		MMP2
FNDC3B	CLEC6A	VIM	SRPX	TPSD1		MMP9
LRP12	CLEC7A	YWHAE	DMBT1	MARCO		LTBP1
UMOD	EMCN	YWHAZ	ADAM19	PTPRF		COL8A2
NOTCH2NL	GPC2	ACAT1	SEMA4A	DSCAM		COL13A1
KLK13	GPC3	AOC3	CELA3B	CPZ		COL14A1
LRP10	GPC5	APOD	MMP8	ITGB1		COL4A5
THBD	GRIFIN	APOE	MMP25	CNTN1		COL15A1
THSD7B	LGALS13	ATP1A1	VWCE	NFASC		COL9A1
TMPRSS6	LGALS14	ATP2A2	C1QL3	CP		COL28A1
SSC4D	LGALS16	ATP5B	NTNG2	PTGFRN		COL6A2
CR2	MUC12	C4A	LOXL4	CPVL		LAMA5
LRP8	MUC15	CANX	ADAM8	PCDH11Y		COL25A1
CR1	MUC21	CCT2	SEMA3G	CDH1		ADAMTSL1
LRP3	MUC22	CCT6A	CELA2B	FAP		COMP
TMPRSS2	MUC7	CCT7	PAPLN	DSC2		FBLN5
NRXN3	MUC8	CPA3	LAMA3	CDH11		COL9A3
CELSR3	MUCL1	CRYAB	ADAM15	DDOST		LTBP2
NAGPA	PARM1	CSE1L	MMP19	LMAN2		LAMC3
KLK8	PLXDC1	CYB5B	SEMA3F	SORT1		COL6A1
TMPRSS9	PROL1	DSP	ADAMTS18	FAS		COL6A3
TENM4	REG4	DYNC1H1	KAL1	ISLR		COL21A1
CTRC	SDC4	ECH1	ADAMTS6	HLA-DRB1		LAMB1
TENM1	SEMA3D	EEF2	MATN3	A1BG		TINAGL1
CUBN	SFTA2	EIF2S3	SEMA6C	SIGLEC11		ADAM10
CD248	SFTA3	EIF5A	ADAMTSL2	C5		BGN
OVCH2	SFTPB	ENO1	EGFLAM	ITGAM		COL10A1
SELP	SFTPC	EPPK1	MST1	VASN		EGFL7
TENM2	CST11	FLNB	LOXL3	IGHG2		LAMA2
PTPRS	CST7	GNB1	TNN	RCC1		HPX
PTPRJ	CST8	GNB2L1	MMP28	GRIN2D		COL8A1
OVCH1	CST9	H3F3A	MUC5B	IGHD		COL9A2
PROZ	CST9L	HADHA	ADAM22	IGHG4		COL23A1
PTPRH	CSTL1	HIST1H2AA	PODNL1	ITGA6		GAS6
SCARF2	CTSE	HIST1H2BK	PCOLCE2	PPIF		THSD4
TMPRSS7	CTSO	HIST2H2AC	MMP1	TNS3		C1QTNF5
LIFR	EGLN1	HNRNPK	MMP10	MCAM		COL27A1
PRSS33	EGLN2	HNRNPU	LOXL2	IGHG1		ADIPOQ
CELSR1	EGLN3	HSP90B1	COLQ	ERLEC1		LAMC1
SDK1	FAM20A	HSPA1L	C1QL2	CD276		IGFBP7
NRXN1	FAM20B	HSPA5	F13B	NCAM1		PODN
MPL	HMSD	IDH2	CYR61	BCAM		SERPINB6
ITGB8	HYAL1	IGLL5	PAMR1	C8A		MXRA5
TPSB2	HYAL2	ITGAV	CLEC18A	NPTN		MBL2
TNFRSF8	HYAL3	JUP	MMP11	IGHM		F2
CELSR2	HYAL4	KRT14	EYS	ENPP1		C1QA
ADGRB2	KY	KRT17	COL26A1	HPR		HCFC1
TNFRSF1B	LEPREL1	KRT19	TLL1	ITGA11		COL18A1
TNFRSF1A	NGLY1	MATR3	SERPINA4	APCDD1L		AMBP
ADGRB1	OGFOD1	ME2	NTNG1	ITGA5		CILP2
IL27RA	OGFOD2	MYL12A	SEMA4D	LINGO2		MATN2
CSF3R	P4HA3	MYL6	TLL2	LAMP2		LUM
IL6R	P4HTM	MYOF	SEMA5B			CTSC
TMEFF2	PAPPA2	NCL	OTOL1			MFAP4
TMPRSS5	PI3	NDUFS1	WISP1			PRSS1
PTPRT	SERPINB2	P4HB	CRLF1			C1QC
NRXN2	SERPINE3	PDIA3	NELL2			COL6A6
GZMK	SERPINI1	PDIA6	SCUBE1			C1QB
FAT4	SERPINI2	PGRMC1	MUC6			C1QL4
TIE1	SPAM1	PHB	CRISPLD2			DCN
LDLR	TGM6	PLEC	NOV			COL6A5
TMEFF1	TIMP4	PPIA	SEMA3C			S100A1
SORL1	AMH	PTBP1	A2ML1			SERPINA3
CNTN5	ANGPT1	PTMA	PCSK5			HMCN1
PTPRB	ANGPT2	RAP1B	CELA2A			SERPINF1
CDON	ANGPT4	RHOA	COL20A1			S100A4
KLK15	ANGPTL1	RHOC	WNT10A			CSPG4
CTRL	ANGPTL3	RPL9	BMP8A			CTSA
TNFRSF11A	ANGPTL5	RPS12	LPA			PCOLCE
CEMIP	AREG	SFPQ	SCUBE2			CCBE1
CRISP3	BDNF	SFXN1	ADAMTS14			CSPG5
TMPRSS11D	BMP5	SH3BGRL3	ZP1			PXDN
PRSS23	BMP6	SLC25A6	SEMA7A			SERPINH1
PRSS22	BRINP2	SPTAN1	TSKU			VTN
HPN	BRINP3	TCP1	EDIL3			LGALS1
UNC5B	BTC	TMED2	SRPX2			SERPINB1
LDLRAD3	CBLN2	TOMM70A	S100A12			COL17A1
SEZ6	CBLN3	TUBB3	ADAMTS15			PLG
LILRB2	CCL14	UGP2	MASP1			ASPN
KLK12	CCL15	UQCRFS1	NTN5			A2M
ARSH	CCL16	VCP	GDF10			CD109
CD5	CCL17	VDAC1	FREM2			HRNR
KIAA0319L	CCL20	VDAC2	WNT11			MUC17
FAT3	CCL22	IGHG3	WISP2			FMOD
DCC	CCL23	KRT6A	SFTPD			CST3
IL6ST	CCL24	IGHA2	ADAM2			CILP
CD46	CCL25	EEF1G	SEMA4B			SERPINA1
RELT	CCL26	GPX3	CLEC18B			PRELP
NECTIN3	CCL27	IGJ	FCN3			HRG
NETO1	CCL3	PGK1	SERPINB8			S100A9
TYRP1	CCL3L3	PLEKHH3	SCUBE3			SERPINB9
OSMR	CCL4	RPN1	VIT			AGT
CNTN2	CCL4L1	SNRPF	WNT5A			PLXNB2
DCBLD1	CCL4L2	SUB1	MMP13			HTRA1
PRSS44	CCL7	TPM2	SERPINA11			OMD
LILRB1	CLCF1	ACTN1	WNT2B			LGALS9
CNTN3	CNTF	AQP1	BMP1			S100A11
LILRB5	CRHBP	C9	HABP2			LGALS7
PRSS8	CRLF3	CALM1	ADAMTSL5			SPON1
IL31RA	CSF1	CALR	MMP24			ITIH1
UNC5D	CSF2	CD81	NELL1			PRSS3
GALNS	CSF3	CLU	SERPINE1			MFGE8
KREMEN2	CSH1	CS	ADAMTS2			ANXA4
PTPRQ	CSH2	DYNLL2	SERPINA5			CTSD
DCBLD2	CSHL1	EPHX1	TGM3			TGFBI
SIRPB2	CTF1	HIST2H3A	SEMA3B			ANXA7
LTBR	CX3CL1	HNRNPR	ADAMTS7			CTSG
HHIPL2	CXCL10	ILF2	SEMA6D			CLEC3B
IL12RB1	CXCL11	KRT10	F9			VWA1
NGFR	CXCL6	KRT9	ADAMTSL4			ANXA11
PRSS3P2	CXCL9	LDHB	ADAMDEC1			CTSB
DLK2	DHH	LMNB1	WNT5B			S100A8
TNFRSF25	EDA	MSN	COLEC11			F13A1
PCSK4	EPGN	MYH10	HAPLN3			TGM2
KIR3DX1	EPO	PRKCDBP	WNT6			S100A10
INSRR	EREG	RPLP0	CELA1			MUC16
PRSS29P	FASLG	RPLP1	ADAM20			OGN
TYR	FGF11	RTN4	SEMA4C			LAMC2
DCT	FGF12	SOD3	IGFALS			LOXL1
VSIG10L	FGF13	TF	WNT9A			SLPI
KLK7	FGF14	TOMM22	ITLN2			TIMP3
IL11RA	FGF16	TTR	WISP3			SERPINC1
LDLRAD2	FGF17	VDAC3	MUC2			TIMP1
PKHD1	FGF18	XRCC5	LRG1			FGG
CD27	FGF19	XRCC6	S100P			MUC1
CA10	FGF21	ACTN2	VWDE			ANXA3
PRSS53	FGF22	ACTN4	BMP4			ANXA2
PTPRK	FGF23	ACTR2	WNT7A			S100A16
PROC	FGF3	ARF3	SERPINE2			S100A6
LRRC70	FGF4	ARF4	EMID1			MDK
LEPR	FGF6	ATL3	HMCN2			LGALS9B
TNFRSF6B	FGF7	ATP5O	WNT7B			ANXA5
WFDC3	FGF8	B2M	ADAM33			SERPIND1
ITGAL	FGFBP1	BASP1	CHAD			ITIH4
PTPRM	FGFBP3	CALD1	S100B			SFRP2
KLK4	FIGF	CAP1	MMP15			TIMP2
ROBO3	FLT3LG	CCT8	SEMA4G			S100A13
TEK	FSTL1	CD44	HGFAC			EMILIN1
CRTAC1	GDF1	CKAP4	MUC4			VCAN
VSIG4	GDF3	CLIC1	EPYC			ANXA1
UNC5A	GDF5	COX5A	CHRD			ANGPTL4
TMPRSS11A	GDF6	DDX39B	SERPINA6			LOX
LILRA1	GDF9	DPYSL3	HAPLN4			SERPING1
ACR	GDNF	DYNLL1	FCN1			FGB
SCARF1	GH1	ERLIN2	TGM5			LAMA4
TMPRSS4	GH2	FTSJD2	TGM4			FGL2
LDLRAD1	HBEGF	FZD6	KERA			POSTN
KLK9	IFNA1	GLUD1	BCAN			ITIH5
ITGAX	IFNA10	H1FX	PLXND1			SERPINF2
PTPRU	IFNA13	H2AFZ	HAPLN1			ELN
TNFRSF14	IFNA14	HADH	ADAMTS1			LGALS3
PTPRD	IFNA16	HADHB	CXCL3			FGF2
LILRB3	IFNA17	HIST1H1B	F10			ITIH2
CTRB1	IFNA21	HIST2H2AB	CELA3A			C1QTNF3
ITGB7	IFNA4	HM13	CTSV			PLOD3
SDK2	IFNA5	HMGB2	PAPPA			ANXA6
ARSD	IFNA6	HMGN1	NYX			DPT
FAT1	IFNA7	HNRNPC	OIT3			LMAN1
PCDH1	IFNA8	HNRNPM	PLAT			ITIH3
LAG3	IFNB1	HSP90AA1	SEMA5A			MGP
IGSF9B	IFNE	HSP90AB1	TINAG			ANGPTL2
PCDH15	IFNG	HSPA9	LAMB3			FST
OSCAR	IFNK	HSPB1	SERPINB10			GPC1
PMEL	IFNW1	KRT18	LGALS8			FGA
CD33	IGF1	LASP1	ADAM21			PLXDC2
FAT2	IGF2	MARCKS	FREM1			ABI3BP
BOC	IHH	MDH2	NCAN			CSTB
KLK5	IL10	MGST1	ELANE			CTHRC1
NLGN1	IL11	MT-CO2	ACAN			KNG1
KIRREL2	IL12A	NHP2L1	PF4			SULF1
NEO1	IL13	NOP58	ADAM11			SPARC
KLK2	IL15	NTPCR	ADAM28			MFAP5
AZU1	IL17A	OAT	LGI1			COLEC12
SGSH	IL17B	PAICS	SERPINB5			MMRN1
LY75	IL17C	PARP1	ZP3			MFAP2
HEPH	IL17F	PCBP1	INHBE			EMILIN2
PRSS48	IL18	PFKL	SERPINB12			CLEC11A
CDSN	IL19	PGD	RELN			LEPRE1
PKHD1L1	IL1A	PHB2	IGSF10			SPP1
MAMDC2	IL1B	PHGDH	HPSE			MMRN2
PRSS21	IL1F10	PPIB	LGALS4			AEBP1
TMEM2	IL1F5	PRKCSH	OPTC			ECM1
CFP	IL1F6	PSAP	RSPO4			P4HA2
PCDH7	IL1F7	PYGB	ADAM23			MFAP1
DKK4	IL1F8	RPL12	PF4V1
IGDCC4	IL1F9	RPL18	TGFB1
LY9	IL1RN	RPL24	CTSZ
PRSS50	IL2	RPL27	FGL1
CNTN6	IL20	RPL36	CBLN4
GP6	IL22	RPL4	INHBC
LRRC15	IL23A	RPL7A	ADAM7
EGFEM1P	IL24	RPN2	PZP
LILRA4	IL25	RPS15A	CPN2
CD96	IL26	RPS2	CXCL1
PIGR	IL3	RPS3	CTSH
HAVCR1	IL34	RPS3A	LGALS2
PRSS36	IL4	RPS6	PRG3
IL21R	IL5	RRBP1	HTRA3
ITGB6	IL6	SEC22B	CTGF
ITGA10	IL9	44085	EGFL6
CHIT1	INHA	SLC25A5	TMPRSS15
DKK1	INS	SND1	SEMA4F
ADGRB3	INS-IGF2	SRP14	VWA2
KLKB1	INSL3	SRRM1	ADAMTS19
FSTL4	INSL5	SUN1	MATN4
IGSF9	INSL6	TAGLN	ADAM32
STS	ISM2	TAGLN2	PXDNL
TMPRSS11B	KITLG	THY1	CTSK
PSG11	LEP	TMEM109	CLEC3A
KLK14	LIF	TMPO	ADAM18
SMG8	LTB	TRAP1	ADAM30
CDH22	NGF	TUBA4B	CXCL13
KIR2DS2	NRG1	VCL	MMP27
PRSS43	NRG4	ACAA2	SMOC1
KIR3DL3	NRTN	ALDOC	MMP17
SIGLEC12	NTF3	APMAP	BMP8B
KIR3DL2	NTF4	APOA1	IGFBP6
CDHR3	OSM	ARPC3	CTSS
DMKN	PDGFA	ARPC4	MUC5AC
LILRA3	PDGFB	ARPC5	MUC13
SARAF	PDGFC	ATP5F1	HSPC159
CD180	PDGFD	ATP5H	CHADL
CTRB2	PGF	BANF1	CST6
CD300LG	PIK3IP1	CACNA1S	C1QTNF2
ROBO2	PRL	CCT3	NTN1
CNTN4	PSPN	CCT4	HAPLN2
NRROS	RPTN	CCT5	HPSE2
CDH4	S100A2	CD14	CBLN1
DDR1	S100A3	CD59	MMP7
TMPRSS11E	S100A7A	CDC42	WNT10B
PRSS54	S100A7L2	CFL1	SERPINB4
HEPHL1	S100G	CHMP4B	KAZALD1
KIR2DL4	SFRP5	CKMT1A	MATN1
CFHR3	TCHHL1	CLTC	FLG2
CD320	TGFA	CMAS	CRELD2
TMPRSS3	TGFB3	COX7A2	LGI4
PRSS27	THPO	DHX9	ADAM29
ARSF	TNF	EEF1D	SBSPON
TREML2	TNFSF10	EIF6	MMP21
KLK10	TNFSF11	ENO3	LEFTY1
KLK11	TNFSF12	FAU	SEMA6A
TPSG1	TNFSF13B	FBL	GLDN
CEACAM19	TNFSF14	GNA13	CTSL
L1CAM	TNFSF15	GNB2	PRG2
KIR2DS5	TNFSF18	GSTK1	PCSK6
IGSF11	TNFSF4	HNRNPA1L2	ITIH6
PCDHAC1	TNFSF8	HNRNPA2B1	CXCL12
CEL	TNFSF9	HNRNPH1	CCL19
F11	VEGFA	HP1BP3	WNT1
FLRT3	VEGFB	HSD17B4	SERPINB3
LILRA6	WFIKKN1	HSPA1A	SDC3
ARSB	WFIKKN2	IMMT	ANGPTL7
DSG1	XCL1	KRT79	ADAMTSL3
KIR2DL1	XCL2	LAMP1	HTRA4
NRCAM	ZFP91	LCP1	DSPP
CD6		LMNB2	ZP2
FLRT2		LRPPRC	IL17D
PLA2R1		LRRC59	BMP3
KIR2DL3		MAOB	CST1
SIGLEC8		MIF	TGM1
PCDH11X		MX1	CCL21
GZMA		MYH14	IGFBP5
KIR2DL2		NONO	HGF
OMG		NOP56	FRZB
LRP5		PDCD6	LEFTY2
KIR2DL5B		PRAF2	CRISPLD1
PCDH9		PRKDC	CLEC14A
CRISP2		PUF60	PPBP
NETO2		PYCR1	PLXNC1
KIRREL1		RAB14	SEMA6B
PSG5		RAB1A	WNT9B
CD300C		RAB2A	WNT2
LILRA2		RAB35	FLG
RTN4RL2		RCC2	SFTPA1
BTNL3		RCN2	SPON2
SIRPA		RPL10	TNFSF13
PCDHGB7		RPL10A	TECTB
CDH24		RPL11	FREM3
LRRC55		RPL19	CCL28
DPP4		RPL23	CXCL14
LRIG1		RPL27A	AMELX
PCDH19		RPL28	ITLN1
CHL1		RPL3	OVGP1
PSG2		RPL35	MUC20
LRRC4C		RPL5	SPOCK1
CD22		RPL8	VWA5B2
NXPH3		RPS11	SERPINB11
DGCR2		RPS13	FNDC1
FURIN		RPS14	WNT3
C17orf99		RPS15	PLAU
SMPD3		RPS16	FGF1
RTN4RL1		RPS17L	MMP23B
DSC1		RPS19	CLC
ESAM		RPS4X	ZP4
PLPPR4		RPS5	SERPINA9
TNFRSF21		RPS8	SHH
SIGLEC9		RPS9	AMELY
INSR		RPSA	GDF7
IL9R		44076	BMP7
SUSD4		SF3B3	COCH
DSG3		SFXN3	S100A7
PRLR		SLC25A1	C1QTNF9
OPCML		SNRPD1	SERPINA7
KLK1		SNRPD2	C1QL1
KLK6		SNRPD3	S100A14
NPHS1		SQRDL	TPO
NEU3		SRCIN1	CLEC18C
CD40		SRSF2	TGFB2
MST1R		SSR4	PRSS2
KIR3DL1		STOML2	SPOCK3
CUZD1		TKT	VWC2L
IL23R		TMX1	IL16
IL13RA1		TOMM6	SULF2
TMPRSS11F		TPI1	FSTL3
FCRL3		TUBA1B	WNT4
PRSS41		TUFM	WNT3A
GAS1		UQCRC1	WNT16
HAVCR2		USMG5	FGF9
PCDHGC3		VAT1	CRNN
LRIG3		YWHAB	IBSP
PCDH10		YWHAQ	MEGF9
TNFRSF10B		KRT1	CTSF
VSIG1		ARHGAP35	MST1L
GHR		GPD2	PLXNA4
SIGLEC5		KRT2	GDF15
FETUB		RPL23A	NRG2
DCHS1		1 SV=1 - [KV306_HUMAN]	SDC2
FCRLA		1 SV=1 - [LV103_HUMAN]	FAM20C
NLGN3		1 SV=1 - [LV106_HUMAN]	INHBA
SLC3A1		1 SV=1 - [LV205_HUMAN]	SERPINB13
CEACAM18		1 SV=1 - [HV304_HUMAN]	GPC4
DKK2		1 SV=1 - [HV316_HUMAN]	SPOCK2
KIR2DL5A		1 SV=1 - [KV301_HUMAN]	IL12B
TNFRSF10C		1 SV=2 - [KV402_HUMAN]	C17orf58
CTBS		1 SV=1 - [HV101_HUMAN]	AMBN
LRP4		1 SV=1 - [HV311_HUMAN]	SEMA3A
C4BPB		1 SV=1 - [KV108_HUMAN]	SMOC2
PCDH17		1 SV=1 - [KV204_HUMAN]	CXCL2
KIR2DS1		1 SV=1 - [KV305_HUMAN]	ASTL
TNFRSF10D		1 SV=1 - [LV105_HUMAN]	TGM7
IGSF1		5 SV=1 - [R13AX_HUMAN]	C1QTNF9B
CDH7		1 SV=1 - [KV105_HUMAN]	GREM1
NLGN4Y		1 SV=1 - [KV106_HUMAN]	MFAP3
CA11		ACTG2	CSTA
KREMEN1		ATP5J	SLIT3
CMA1		ATP6V1A	HCFC2
LAIR2		CAMK2D	PTN
IL2RB		COPB2	EGFL8
RAET1G		HIST1H1E	PLXNA2
ICAM3		HMGA1	SFRP1
PRTG		HNRNPUL2	GPC6
TLR8		IFI16	ANGPTL6
GNS		MARCKSL1	SFTPA2
SUSD5		NUMA1	CFC1B
ARSJ		PLEKHS1	WNT8A
HLA-DRB3		RPL18A	COLEC10
PSG1		SEC61B	SLIT2
TDGF1P3		SLC39A4	MUC3A
F3		SYPL1	NRG3
ITGA2		TOR2A	C1QTNF8
KIR3DS1		TRIM28	REG1B
IL18RAP		1 SV=1 - [KV119_HUMAN]	WNT8B
GZMB		1 SV=1 - [KV121_HUMAN]	PLXNA1
LRRTM1		ASPH	C1QTNF7
ZAN		C19orf43	FNDC7
CD200R1		CSDA	CTSW
LYPD5		CSRP1	SLIT1
FCGR2A		EIF4B	REG3G
TNFRSF4		GAR1	FCN2
GLIPR1L1		HIST1H2BJ	WIF1
CDH15		HLA-B	ADAM17
DDR2		HSPE1	SERPINB7
IFNAR1		KRT13	BMP2
NEGR1		LDHA	MUC19
IGKV1D-12		METAP1	REG3A
VSIG10L2		MTDH	FGFBP2
DNASE2		PEG3	PRG4
PRTN3		PHOX2B	S100A5
ARSE		RAB7A	CDCP2
IL10RA		RPL13	VEGFC
SSC5D		RPS25	MEP1A
TNFRSF9		SERBP1	IGFBPL1
NCR2		SLC25A3	IGFBP4
FCRLB		SPCS2	DMP1
NOTUM		SPERT	ECM2
OC90		SRPRB	IMPG2
SIGLEC10		APCS	CXCL5
ILDR2		CAPZA2	ESM1
MUC3B		COG4	PLXNB3
CDH23		ENO2	C1QTNF6
LINGO1		FAM59B	CCL1
VSIG8		GYS2	HHIP
IFNGR1		HIST1H2BA	SPARCL1
MXRA8		HIST1H2BD	NDNF
ACP7		HIST2H2BD	BMP15
CDH12		KCNQ4	FGF10
GZMM		KTN1	INHBB
CDH2		LGALS3BP	EMILIN3
CDHR5		NUDT1	CST5
IL2RG		OLFML3	LGALS9C
NEU1		PFN1	PLXNA3
CDH3		POTEE	FNDC8
PSG8		PRPH	CCL11
SPINT1		RPL7	MEP1B
WFDC8		RPS7	SEMA3E
PSG3		SARS2	PLXNB1
PSG7		SPTBN1	CCL2
IL10RB		TROAP	BMP10
TMPRSS12		TUBA1C	VWC2
PRSS55		TUBB2B	LTA
LRIG2		1 SV=1 - [KV302_HUMAN]	ZPLD1
FCRL2		ACTR3	EBI3
RTN4R		ADH1B	LGALS12
LRFN1		AHSG	CFC1
LRP6		APEX1	FGF20
FLRT1		ARCN1	SERPINA10
SIRPG		ATP5L	SERPINA12
FGFRL1		BST2	GDF11
PSG6		C14orf166	SERPINA2
FCRL4		C22orf28	CLEC9A
IGSF3		CALU	MMP26
EFNB1		CAPG	TDGF1
PRSS37		CAPZA1	CST4
PCDHA13		CD74	ISM1
MDGA1		CNN3	GDF2
PRSS57		COPA	CXCL8
R3HDML		COPB1	RSPO1
PSG4		COPZ1	CCL13
PCDHGB5		CTNNB1	CST2
KIR2DS4		DDX17	CCL8
ERVS71-1		DLAT	ELFN2
SIGLEC7		DPYSL2	ELFN1
CDH26		DST	CCL5
PCDHB1		ECHS1	REG1A
PCDH8		EIF4A1	FGF5
PCDHGB4		EMC8	CPAMD8
IL7R		ERCC6L	CCL18
SIRPB1		FERMT3	S100Z
KLRB1		FKBP2	MSTN
LRRC4B		GNAI2	NODAL
CHODL		GOT2	IMPG1
EFNA4		GSTP1	MEPE
CD244		HMGB1	TCHH
IGSF8		HNRNPD
OVOS1		HNRNPH3
CD69		HNRPDL
CADM2		ILF3
LRRC32		IQGAP1
LILRA5		KCTD12
DSC3		LRRC47
PCDHGB6		MANF
NCR1		METTL7A
IGHE		MOGS
CEACAM5		MRPL12
RNF43		MVP
FSCN3		MYO1C
LRTM2		NDUFA8
UMODL1		NME2P1
KLK3		PALLD
PCDHA10		PCBP2
MANBA		PDIA4
CNTFR		PEBP1
CEACAM6		PICALM
CSF2RB		PRDX5
PCDHGB2		PSMA4
FOLH1		PTGIS
MDGA2		RPL14
LRRTM2		RPL22
TREML4		RPL6
CD68		SEC23A
CYB5D2		SLC25A4
TFPI2		SP100
NLGN2		STAT1
PCDHAC2		TAPBP
PCDHA7		TJP2
ADAM5		TLN1
ERBB4		TMED9
THSD1		TMEM43
IGKV1-33		TMOD3
KIR2DS3		U2AF2
IGKV1D-33		YWHAG
NECTIN1		ANP32B
PCDHA9		ARPC2
DPP9		HLA-DRA
IGSF21		SSR2
KIAA1324L		TXN
TLR7		1 SV=1 - [MUCB_HUMAN]
ROBO4		ACAA1
VSTM2A		ACTG1
CDHR4		ACTN3
IGKV4-1		AIFM1
PCDHB3		ALDH1A1
LRFN3		ALDH2
FCAR		ANKMY2
IGDCC3		AP4E1
LILRB4		APRT
IDS		ARHGDIA
LRRN4		ASS1
CDH10		ATP5D
EPOR		ATP5J2
CEACAM7		BAG2
KIRREL3		C19orf54
CDH17		CAT
PCDHB12		CLTA
FAM189A1		CNN2
TNFRSF19		COPG1
SLITRK1		CORO1A
ZDHHC8		CTTN
LCT		CYB5R3
BTNL8		DAD1
IGKV1-39		DLST
LRIT3		DOCK9
OVOS2		EEF1B2
LRRC4		EHD2
IL5RA		EIF2S1
EFNA3		EIF4A2
TMEM123		ERP29
GP1BA		ETFA
TRIL		ETFB
IL20RA		FABP4
PCDHGA3		FABP5
CEACAM1		FSCN1
IGKV6D-21		FTH1
ARSG		GANAB
ASPHD2		GLO1
IGF1R		GPI
EDA2R		HEBP2
FCRL1		HIST1H2BM
SIGLEC6		HIST1H2BO
IL2RA		HNRNPA3
PRSS42		HSD17B10
IGKV2D-28		IGG
AMIGO2		KIAA0913
SLAMF1		MDH1
LYZL4		MYL9
GP5		NAP1L1
PRSS45		NME1
WFDC1		ORM1
AMY1A		PDHB
FBXO10		PGM1
CD48		PLIN1
VSIG2		PLS3
ICAM5		PML
MANSC1		PRDX2
IGKV1D-39		PRDX3
SORCS1		PRDX6
IGKV1D-17		PSMA5
ARSA		PSME1
SIRPD		RAB10
PCDHGB1		RAB1C
SIGLEC1		RAP1A
PCDHA6		RBMX
ROBO1		RNH1
IGKV6-21		RPL30
LECT2		RPL31
TNFRSF10A		RPL35A
PCDHA5		RPS10
MET		RPS27A
FCRL5		RSU1
REELD1		SEC24B
HEPACAM2		SET
HEG1		SF3A2
PCDHGA5		SRP9
SLAMF7		SRSF1
PCDHGC4		SRSF3
IL3RA		SUCLG1
IGKV1-12		TIMM13
IGKV1-5		TMED10
CD164L2		TOP2B
PSG9		TPD52L2
LYPD3		TPM3
CEACAM4		TUBA4A
PCDHGA1		TUBB4B
PDCD1		TUBB6
UNC5C		UBA1
FCGR3B		UQCRB
RAG2		UQCRC2
ILDR1		1 SV=1 - [KV405_HUMAN]
PRSS47		AK2
IGKV2-28		ALDH1B1
BCHE		APOA2
CHI3L2		APOC3
IGKV5-2		ARPC1B
CRISP1		ATP1B1
CHIA		BLVRB
CPD		CTNNA1
DPP6		DDX5
IGHV5-51		EFTUD2
TARM1		GCN1L1
C3orf80		GPX1
AMY2A		HDGF
EPHA6		HDLBP
CD101		HLA-A
P2RX7		HMGN2
IGHV3-15		HYOU1
SI		IGLC1
SLAMF6		IKBIP
KIAA1324		ITGA3
ANTXR2		KRT85
IL1RL2		MGST2
CPA4		MX2
LRP11		MXRA7
LTK		OCIAD1
MICA		PABPC1
FCRL6		PARK7
IL22RA2		PGRMC2
FCMR		PTGS1
TLR9		RECQL
LRFN5		RHOG
LRFN2		RIC8A
ZG16		RPL13A
PTPRG		RPL17
WFDC2		SAMHD1
IGKV3-11		SAMM50
VNN2		SDHA
CSF2RA		2020-09-07
WBP1L		SMARCC2
ITGAD		SYNCRIP
NEU2		TAX1BP3
SUMF1		TPT1
CLEC20A		UFM1
CDH18		VAMP3
NTM		WARS
IGKV2-30		YBX1
IGKV1-9		DEFA1
PCDH18		CSNK2A1
IGKV3D-11		LONRF2
EPHA5		CAV1
TMEM25		CD36
LDLRAD4		FHL1
CD300LD		PLIN4
IGKV1D-43		EEF1A2
IGHV5-10-1		GNAL
IGKV1-17		GPD1
PCDH20		GPR98
CDHR2		AGPAT2
IGLV5-52		ATP2B3
PCDHGA9		CES1
WSCD1		MAOA
		PLCXD2
		TLN2
		1 SV=1 - [HV107_HUMAN]
		1 SV=1 - [HV301_HUMAN]
		1 SV=1 - [KV114_HUMAN]|Ig kappa chain V-I region DEE OS=Homo sapiens
		1 SV=1 - [LV102_HUMAN]
		1 SV=1 - [LV301_HUMAN]
		1 SV=1 - [TBB8L_HUMAN]
		2 SV=1 - [RP1BL_HUMAN]
		3 SV=2 - [RUXGL_HUMAN]
		4 SV=1 - [HV209_HUMAN]
		ACO2
		ACTA1
		ACTC1
		ADD1
		ADD3
		ADH1C
		ADH5
		AHNAK2
		AK1
		AKR1A1
		ALDH6A1
		ANHX
		ANKRD31
		ANKRD9
		ANP32A
		ANP32D
		AP2A1
		AP2B1
		AP2M1
		APAF1
		APC
		APC2
		API5
		ARHGAP1
		ARL6IP5
		ARL8A
		ARL8B
		ASAP2
		ATIC
		ATP10A
		ATP13A1
		ATP1A2
		ATP1A3
		ATP2B2
		ATP5I
		ATP6V0D1
		ATP6V1B1
		BCAP31
		BDH2
		BRD1
		BSG
		BUB3
		C10orf131
		C12orf63
		C1orf63
		C8G
		C9orf142
		C9orf156
		CALML3
		CAND1
		CAPNS1
		CAPZB
		CAV3
		CBX3
		CCDC11
		CCDC158
		CCDC80
		CCT6B
		CD47
		CD9
		CDK5RAP3
		CENPF
		CENPJ
		CHCHD3
		CHMP2A
		CLIP2
		CNDP2
		COA3
		CORO1B
		CORO1C
		COX4I1
		COX5B
		COX6B1
		COX6C
		CREB1
		CRIP2
		CRMP1
		CRYZ
		CTAGE5
		CYB5A
		CYCS
		CYFIP1
		CYFIP2
		DARS
		DCTN1
		DDX3X
		DDX3Y
		DDX42
		DDX46
		DECR1
		DEK
		DES
		DHRS7
		DHX29
		DKC1
		DNAH9
		DNAJA1
		DNAJB11
		DNAJB6
		DNAJC11
		DNAJC3
		DNAJC9
		DNM1
		DOCK11
		DYNC1LI2
		ECHDC1
		EEF1A1P5
		EHD4
		EIF1B
		EIF3C
		EIF3G
		EIF3H
		ELAVL1
		EMC2
		EMD
		EML4
		EPB41L2
		ERAP1
		ERGIC1
		ERLIN1
		ESCO2
		ESYT1
		EWSR1
		EZR
		FAM120A
		FAM213A
		FAM82A2
		FARSB
		FASN
		FBF1
		FBLL1
		FERMT2
		FHL3
		FKBP3
		FLNC
		FLOT1
		FLOT2
		FRMPD1
		FUS
		FXR1
		G3BP1
		GAA
		GABRP
		GAL3ST4
		GBP4
		GDI2
		GLG1
		GLIPR2
		GLT25D1
		GLUD2
		GNA11
		GNAS
		GNB3
		GNG12
		GNL3
		H2AFJ
		H2AFX
		H2AFY2
		H3F3C
		HARS
		HBD
		HIST1H1D
		HIST1H2BB
		HIST1H2BN
		HK1
		HLA-C
		HNRNPL
		HSP90B2P
		HSPA2
		HSPA4
		HSPB6
		IFITM1
		IGF2BP2
		IGHV4OR15-8
		IGLC6
		IGLC7
		IL4I1
		ILK
		IMPDH1
		IPO4
		IVD
		JAK2
		KANK2
		KATNA1
		KHDRBS1
		KHSRP
		KIAA1217
		KIAA1383
		KIAA1468
		KIAA1967
		KRT75
		LAMTOR1
		LANCL1
		LEMD2
		LGMN
		LIMA1
		LIMS1
		LMCD1
		LMO7
		LMOD1
		LPP
		LSM3
		LTA4H
		MAP1B
		MAPK1
		MAPRE1
		MCCC1
		MECP2
		MFHAS1
		MGA
		MICAL3
		MKL1
		MLEC
		MLL3
		MNDA
		MPRIP
		MRPL11
		MRPL51
		MTHFD1
		MYADM
		MYH2
		MYL3
		MYL6B
		MYLK
		MYO1B
		MYO1D
		NARS
		NAT10
		NCEH1
		NCKAP1
		NDUFA10
		NDUFA9
		NDUFB11
		NDUFS3
		NEFM
		NEXN
		NFATC1
		NHP2
		NME3
		NNT
		NOLC1
		NOMO3
		NR2F1
		NT5C3
		NT5E
		NUP160
		NUP62
		NUP93
		OLFML1
		PA2G4
		PABPC3
		PDCD11
		PDCD6IP
		PDHA1
		PDLIM1
		PDLIM3
		PDLIM4
		PDLIM5
		PDLIM7
		PGAM2
		PGK2
		PHLDB1
		PLGRKT
		POLR1A
		POTEJ
		PPIAL4A
		PPL
		PPP1CB
		PPP1R11
		PPP1R3A
		PPP2R1A
		PPP6R2
		PRAM1
		PRPF19
		PRPF6
		PRRC2A
		PRX
		PSMB6
		PSMB8
		PSMC3
		PSMD1
		PSMD2
		PSMD3
		PSMD5
		PSPC1
		PSTPIP1
		PTGDS
		PTK7
		PTRH2
		PTX3
		PYGL
		RAB11A
		RAB5B
		RAB5C
		RAB8A
		RAC1
		RAD21
		RAD50
		RAE1
		RALY
		RAN
		RAP2A
		RAP2B
		RBM14
		RBM17
		RBM39
		RDX
		RELB
		RNPS1
		RPL15
		RPL26
		RPL34
		RPL39
		RPLP0P6
		RPS10P5
		RPS18
		RPS20
		RPS21
		RPS23
		RPS24
		RPS26
		RPS27
		RPS28
		RPS4Y2
		RPUSD2
		RRAS
		RRAS2
		RTN4IP1
		RUVBL1
		RUVBL2
		SAFB2
		SAP18
		SBDS
		SCARA3
		SCARB2
		SDHB
		SEC13
		SEC31A
		SELH
		2020-09-08
		2020-09-09
		SETSIP
		SF3A3
		SF3B1
		SGCD
		SH3BGRL
		SH3GL1
		SIGLEC16
		SLC25A12
		SLC25A13
		SLC25A24
		SLC25A31
		SLC3A2
		SMC3
		SNAP23
		SNAPC4
		SNRNP70
		SNRPA1
		SNRPB
		SNRPB2
		SNRPE
		SNRPN
		SNTB2
		SNX3
		SNX5
		SNX6
		SON
		SORBS1
		SORBS2
		SORBS3
		SPAG9
		SPR
		SRSF11
		SRSF4
		SRSF6
		SRSF7
		SRSF8
		SSBP1
		SSR3
		SSRP1
		STOM
		STON1
		STT3A
		SUCLA2
		SUCO
		SUN2
		SUPT16H
		SYNPO
		TAF15
		TAF4
		TBC1D8B
		THOP1
		THRAP3
		THYN1
		TJP1
		TMED7
		TMEM119
		TNS1
		TOP1
		TOR1AIP1
		TRA2B
		TRIM50
		TSC2
		TSPO
		TTC28
		TTLL8
		TUBA3E
		TUBAL3
		TUBB2A
		TUBB8
		TXNDC5
		UACA
		UBA52
		UBAP1L
		UBE2I
		UCHL1
		UQCRFS1P1
		USO1
		USP39
		UTRN
		VAPA
		VARS
		VPS13C
		VPS35
		VTI1B
		WASF2
		WDR1
		XPNPEP3
		YAP1
		YARS
		YBX2
		YWHAH
		ZNF609
		ZNF629
		ZYX
		1 SV=1 - [HV305_HUMAN]
		1 SV=1 - [KV104_HUMAN]
		1 SV=1 - [KV115_HUMAN]
		ABCE1
		ACADVL
		ACSL1
		AK3
		ALDH7A1
		ALYREF
		AP1B1
		AP1S1
		AP3S1
		APOB
		APOL2
		ARHGDIB
		ARHGEF6
		ARPC5L
		ASAH1
		ATP1B3
		ATP2B1
		ATP2B4
		BAX
		BLVRA
		BZW1
		CAD
		CAPRIN1
		CASC4
		CBX1
		CHI3L1
		CHID1
		CLIC4
		CNP
		CNPY2
		COX7C
		CRABP2
		CTSL1
		CYBRD1
		CYC1
		DBN1
		DCXR
		DDRGK1
		DDX19A
		DDX23
		DDX39A
		DDX49
		DDX58
		DHX15
		DLD
		DNAJB8
		DPM3
		DSG2
		EIF1AY
		EIF3B
		EIF4G1
		ERO1L
		ERP44
		ESYT2
		FAM129B
		FAM136A
		FCER1G
		FIS1
		FKBP10
		FKBP9
		FUBP1
		GALNT1
		GBP1
		GNAI3
		GNB4
		GPR113
		GPX8
		HDGFRP2
		HIST1H1T
		HLA-DQB1
		HMGB1P1
		HMGB3
		HNRNPAB
		HNRNPCL2
		HNRNPF
		HSPA12A
		HUWE1
		IDH1
		IFIT3
		KRT15
		LETM1
		LUC7L2
		MAGOH
		MGAT1
		MSR1
		MTA2
		MTCH2
		MUT
		MYO1F
		MYO6
		NAA38
		NACA
		NADKD1
		NCLN
		NDUFB10
		NSF
		NUDT21
		NUP107
		NUP88
		OPA1
		OXSR1
		PARP14
		PARVA
		PBXIP1
		PEA15
		PES1
		PKP2
		PLD3
		PLIN3
		POTEF
		PPP1CC
		PPP1R12A
		PTPLAD1
		PYCRL
		RAB15
		RABAC1
		RAC3
		RAD23B
		RAI14
		RBMXL1
		RCN3
		RNF213
		RPL29
		RPL32
		RPL36A
		RPS27L
		RSL1D1
		SCAMP3
		SDF2L1
		SEC23B
		SEC24C
		SEC61A1
		SEC62
		SEC63
		SF3B2
		SH2D3C
		SHMT2
		SKP1
		SLC25A11
		SLC27A1
		SMARCA5
		SNRNP200
		SNX9
		SPP2
		SRI
		SSR1
		STMN1
		STT3B
		STX7
		SURF4
		TAP1
		TARDBP
		TK2
		TMED3
		TMED4
		TMEM165
		TMEM173
		TMEM205
		TMX4
		TPR
		TRIM25
		TRPM3
		TXLNA
		UGDH
		UPF1
		UTP20
		VAPB
		VKORC1
		WDFY1
		ZMPSTE24
		ZNF207
		1 SV=1 - [HV103_HUMAN]
		1 SV=1 - [HV307_HUMAN]
		1 SV=1 - [KV101_HUMAN]
		1 SV=1 - [KV105_HUMAN]|Ig kappa chain V-I region OU OS=Homo sapiens
		1 SV=1 - [KV112_HUMAN]
		1 SV=1 - [KV114_HUMAN]
		1 SV=1 - [KV203_HUMAN]
		1 SV=1 - [KV309_HUMAN]
		1 SV=1 - [LV204_HUMAN]
		1 SV=1 - [LV302_HUMAN]
		5 SV=2 - [YH010_HUMAN]
		AAAS
		AARS
		ABCD2
		ABCF1
		ABCF2
		ABCF3
		ABHD10
		ABHD11
		ABHD14B
		ABI1
		ABL2
		ACADM
		ACBD3
		ACIN1
		ACLY
		ACO1
		ACOT1
		ACOT13
		ACOT9
		ACP1
		ACSL3
		ACSS3
		ACTL6A
		ACTR1A
		ACTR1B
		ACY1
		ADAR
		ADH1A
		ADPRHL2
		ADRBK1
		AFG3L2
		AGK
		AHCY
		AHCYL2
		AIF1
		AIMP1
		AIP
		AK4
		AKAP12
		AKR1B1
		AKR1E2
		AKR7A2
		AKR7A3
		ALAD
		ALDH18A1
		ALDH1L2
		ALDH3A2
		ALDH4A1
		ALDH9A1
		AMPD2
		ANK2
		ANO6
		ANP32E
		ANPEP
		ANXA2P2
		AOC2
		AP1G1
		AP2A2
		AP2S1
		AP3B1
		AP3D1
		AP3M2
		APEH
		APM2
		APOA1BP
		APOA4
		APOC1
		APOC2
		APPL1
		ARAP1
		ARF5
		ARFGAP2
		ARFIP1
		ARGLU1
		ARHGAP21
		ARHGAP4
		ARHGEF2
		ARHGEF7
		ARHGEF9
		ARL3
		ASNA1
		ATAD3A
		ATAD3B
		ATG2A
		ATP2A1
		ATP5C1
		ATP6V1B2
		ATP6V1C1
		ATP6V1D
		ATP6V1E1
		ATP6V1E2
		ATP6V1G1
		ATP6V1H
		ATPIF1
		AZGP1
		BAIAP2
		BAP18
		BCAS2
		BCAT1
		BCKDHB
		BCLAF1
		BDH1
		BID
		BIN2
		BLMH
		BLNK
		BPIFB3
		BPNT1
		BRK1
		BST1
		BTF3L4
		BYSL
		C11orf54
		C16orf71
		C19orf10
		C1QBP
		C21orf33
		C2orf70
		C4B
		C4orf52
		C6orf203
		C7orf50
		C8B
		C9orf89
		CA1
		CACNA2D1
		CACYBP
		CADM1
		CAMK2B
		CAPN1
		CAPN2
		CAPNS2
		CAPS
		CARS
		CASK
		CAST
		CAV2
		CBFB
		CBR1
		CCDC12
		CCDC124
		CCDC47
		CCDC6
		CCDC90A
		CD2AP
		CD34
		CD63
		CD97
		CD99
		CDC37
		CDC42BPB
		CDC5L
		CDH13
		CDH6
		CDKN2A
		CDO1
		CDS2
		CETN2
		CFL2
		CGN
		CHCHD2
		CHCHD4
		CHD4
		CHD6
		CHD7
		CHERP
		CHMP4A
		CHMP6
		CHP1
		CHTOP
		CIRBP
		CISD1
		CISD2
		CKAP5
		CKB
		CLDN3
		CLINT1
		CLTB
		CLYBL
		CMPK1
		CMTM3
		CNBP
		CNN1
		CNPY3
		CNRIP1
		COMMD2
		COMT
		COPE
		COPS2
		COPS4
		COPS5
		COPS6
		COTL1
		COX7A1
		COX7A2L
		CPNE1
		CPNE3
		CPNE6
		CPSF6
		CPT1A
		CPT2
		CRABP1
		CREBZF
		CROCC
		CRTAP
		CSDE1
		CSNK2A2
		CSNK2B
		CSRP2
		CSTF2
		CTBP2
		CTNNBL1
		CTNND1
		CUL3
		CUL4A
		CUL4B
		CUTA
		CYB5R1
		CYBB
		DAB2
		DAG1
		DAPK3
		DARS2
		DBI
		DBNL
		DBT
		DCTN2
		DDAH1
		DDAH2
		DDB1
		DDT
		DDX1
		DDX18
		DDX21
		DDX27
		DDX47
		DDX50
		DDX59
		DENR
		DGAT1
		DHODH
		DHRS4
		DIABLO
		DIAPH1
		DMD
		DNAJA2
		DNAJA3
		DNAJB1
		DNAJC13
		DNAJC8
		DNM1L
		DNM2
		DNPEP
		DPM1
		DPP3
		DPP7
		DPY30
		DRAP1
		DRG1
		DSTN
		DUT
		DVL2
		DYNC1I2
		DYNC1LI1
		DYNC2H1
		DYNLRB1
		EBNA1BP2
		ECI1
		EDC4
		EDF1
		EEA1
		EEFSEC
		EFHD1
		EFHD2
		EHD1
		EHD3
		EI24
		EIF2AK2
		EIF2B3
		EIF2S2
		EIF2S3L
		EIF3A
		EIF3D
		EIF3F
		EIF3I
		EIF3J
		EIF3K
		EIF3L
		EIF3M
		EIF4A3
		EIF4G2
		EIF4H
		EIF5
		EIF5AL1
		EIF5B
		ELMO1
		ELMO2
		ELP3
		EMC1
		EMC7
		EMP1
		ENAH
		ENDOD1
		ENOPH1
		ENPEP
		EP300
		EPB41L3
		EPHA2
		EPN1
		EPRS
		EPS15L1
		EPS8
		EPS8L2
		ERC1
		ERH
		ESD
		ESRP2
		ETF1
		ETHE1
		EVL
		EXOC4
		EXOC8
		FAF2
		FAHD1
		FAHD2A
		FAHD2B
		FAM114A1
		FAM126A
		FAM129A
		FAM162A
		FAM21C
		FAM26E
		FAM3C
		FAM49B
		FAM54B
		FAM82B
		FAM83H
		FAM98A
		FAM98B
		FARP1
		FBLIM1
		FBXO2
		FBXO41
		FDPS
		FDXR
		FH
		FHL2
		FKBP11
		FKBP15
		FKBP1A
		FKBP4
		FKBP5
		FKBP9L
		FLII
		FMNL2
		FN3KRP
		FNBP1
		FOLR1
		FOXJ2
		FTL
		FUBP3
		FUK
		G6PD
		GALK1
		GBAS
		GBE1
		GBP3
		GC
		GCDH
		GDI1
		GFAP
		GFM2
		GFPT1
		GGCT
		GIMAP4
		GIPC1
		GLB1
		GLOD4
		GLRX5
		GLS
		GLYR1
		GMPS
		GNA14
		GNG2
		GNG5
		GNG7
		GNPDA1
		GOLGA3
		GOLGA4
		GOLGB1
		GOLIM4
		GOPC
		GORASP2
		GPD1L
		GPX4
		GPX7
		GRB2
		GRHPR
		GRIPAP1
		GRPEL1
		GRSF1
		GSPT1
		GSR
		GSTM2
		GSTM3
		GSTO1
		GSTT1
		GTF2I
		GTPBP1
		GUK1
		H2BFS
		HAAO
		HBG1
		HCLS1
		HDAC2
		HDGFRP3
		HEATR1
		HEBP1
		HEXB
		HIBADH
		HIBCH
		HINT1
		HIP1
		HIST1H2AB
		HIST3H2BB
		HIST3H3
		HIVEP1
		HLA-DPA1
		HLA-DPB1
		HMGCL
		HMGN4
		HMOX1
		HNMT
		HNRNPA0
		HNRNPA1
		HNRNPCL1
		HNRNPH2
		HNRNPUL1
		HOPX
		HPCAL1
		HPRT1
		HRSP12
		HSBP1
		HSD17B11
		HSD17B12
		HSD17B8
		HSP90AA4P
		HSPA4L
		HSPH1
		HTRA2
		IARS
		IARS2
		IBA57
		IDH3A
		IFITM3
		IGF2R
		ILVBL
		IMPAD1
		IMPDH2
		INA
		INF2
		INTS8
		IPO5
		IPO9
		IQGAP2
		IRF2BPL
		IRS4
		ITPA
		JPH3
		KARS
		KCNK7
		KDSR
		KIAA1549
		KIAA1609
		KIF2A
		KIF5B
		KIF5C
		KLC2
		KPNA3
		KPNA6
		KPNB1
		KRT16
		KRT6B
		KRT71
		KRT76
		KRT77
		KRT86
		LAMTOR2
		LAMTOR3
		LAMTOR5
		LANCL2
		LAP3
		LARP7
		LARS
		LAS1L
		LBP
		LENG9
		LIN7A
		LIN7C
		LNP
		LNPEP
		LONP1
		LPCAT2
		LRPAP1
		LRRFIP1
		LSM14A
		LSM2
		LSM7
		LSP1
		LTF
		LUC7L3
		LXN
		LYAR
		LYPLA1
		LYRM4
		M6PR
		MACF1
		MAGED2
		MAGOHB
		MAP1S
		MAP4
		MAPK3
		MARS
		MAT2A
		MAVS
		MBD1
		MBNL2
		MBOAT7
		MCCC2
		MCF2
		MCFD2
		MCTS1
		MCU
		MECR
		MED12L
		MGMT
		MIA3
		MIDN
		MNF1
		MPST
		MRE11A
		MRPL1
		MRPL13
		MRPL37
		MRPL4
		MRPL49
		MRPS23
		MRPS36
		MRVI1
		MSH4
		MSLN
		MT-ND2
		MTAP
		MTHFD1L
		MTOR
		MTPN
		MYBBP1A
		MYL1
		MYL12B
		MYO18A
		MYO1E
		MYO3B
		NAALADL1
		NAGA
		NAGK
		NAMPT
		NANS
		NAP1L4
		NAPA
		NAPG
		NARF
		NASP
		NCOA5
		NCSTN
		NDRG1
		NDUFA2
		NDUFA4
		NDUFA5
		NDUFA6
		NDUFA7
		NDUFAB1
		NDUFAF3
		NDUFB3
		NDUFB4
		NDUFB5
		NDUFB7
		NDUFB8
		NDUFB9
		NDUFS2
		NDUFS4
		NDUFS7
		NDUFS8
		NDUFV1
		NDUFV2
		NEDD8
		NEK1
		NENF
		NES
		NFIA
		NFIC
		NFKB1
		NIPSNAP1
		NIPSNAP3A
		NIT2
		NME2
		NMT1
		NMT2
		NNMT
		NOL11
		NOP2
		NPC2
		NPEPPS
		NPM3
		NQO1
		NRAS
		NSDHL
		NSFL1C
		NUCB1
		NUCB2
		NUCKS1
		NUDC
		NUDT16L1
		NUDT22
		NUDT5
		NUP188
		NUP205
		NUP35
		NUP85
		NUP98
		NUPL1
		NUTF2
		NXPE3
		OAS2
		OBSCN
		OGDH
		ORM2
		OS9
		OSBP
		OSTC
		OSTF1
		OSTM1
		OXCT1
		PABPC4
		PABPN1
		PACAP
		PACS1
		PACSIN2
		PACSIN3
		PAFAH1B1
		PAFAH1B2
		PAFAH1B3
		PAIP1
		PALM
		PAPOLA
		PARP9
		PAWR
		PC
		PCBP3
		PCCA
		PCCB
		PCDH12
		PCK2
		PCLO
		PCMT1
		PCYOX1
		PCYT1B
		PCYT2
		PDAP1
		PDCD4
		PDCD5
		PDDC1
		PDGFRB
		PDIA5
		PDP1
		PDPN
		PDPR
		PDS5A
		PDS5B
		PDXK
		PECAM1
		PFDN2
		PFDN6
		PFKM
		PFKP
		PFN2
[truncated: 559 more rows]

## Sheet: Fig. 3D
ECMPride	Matrisome	ECM proteomics dataset	ECMPride|Matrisome	ECMPride|ECM proteomics dataset	Matrisome|ECM proteomics dataset	ECMPride|Matrisome|ECM proteomics dataset
DLL4	BGLAP	FER1L5	COL11A2	STAB1	VWA5A	COL5A1
JAG1	BSPH1	UBA6	SVEP1	FCGBP	ANXA10	COL5A3
JAG2	DDX26B	ESYT2	SNED1	LRP1	ANXA13	COL5A2
USH2A	ELSPBP1	IGLC7	ADAMTS10	LRP1B	ANXA8	VWF
STAB2	IGFBP1	SHTN1	THBS3	ATRN	ANXA8L1	COL2A1
CRB1	IGFBP2	ILVBL	CRIM1	SUSD2	SDC1	THBS1
CNTNAP3B	IGFBP3	ANKRD18B	THBS4	C1S	SFTPB	COL4A4
CNTNAP3	LGI2	DENND3	TECTA	C1RL	SFTPC	NID1
NOTCH1	LGI3	POTEF	ADAMTS17	CFHR5	CTSE	AGRN
CNTNAP4	POMZP3	CNOT1	ADAMTS12	CD163	P4HA1	FBN2
DLL3	RSPO2	PGP	FBN3	NRP1	ANGPT2	COL4A3
NOTCH2	RSPO3	NPEPPSL1	COL4A6	ITGB4	BMP5	COL3A1
CNTNAP5	TNFAIP6	DDTL	FBLN7	C4BPA	IL18	TNC
NOTCH3	TSPEAR	TUBAL3	MEGF6	CD93	PDGFA	HSPG2
DLK1	VWA3A	LRRC14B	COL11A1	C2	PDGFB	COL1A2
PEAR1	VWA3B	NCF1B	NTN4	MRC2	S100A3	COL4A2
DNER	VWA5B1	ANXA2P2	SSPO	THBD	TNFSF10	FBN1
OTOGL	VWA7	MYH7B	ADAMTS20	CFH		BMPER
CNTNAP2	VWA9	GNAT3	MEGF8	C1R		EFEMP2
CSMD3	SRGN	FABP5P3	COL22A1	CFB		LTBP4
CORIN	ANXA9	NCF1C	NTN3	GRN		FBLN1
CNTNAP1	C1QTNF1	FER1L4	MASP2	SELP		COL1A1
CD163L1	C1QTNF4	MYO1G	COL24A1	CD5L		LAMB4
NOTCH4	CD209	HMGB1P1	COL19A1	PTPRJ		COL16A1
DLL1	CLEC10A	CHURC1-FNTB	FRAS1	APOH		FBLN2
CSMD1	CLEC12A	EIF3CL	TNR	CD55		CRELD1
HHIPL1	CLEC12B	IGLL5	EGF	TPSAB1		FN1
SELE	CLEC17A	ABHD14A-ACY1	LTBP3	ITGB5		ADAM9
LRP2	CLEC19A	AKR1B15	KCP	CFI		PRSS12
MAMDC4	CLEC1A	NACA	CHRDL2	GPNMB		LAMB2
SUSD1	CLEC1B	NDUFC2-KCTD14	ADAM12	HP		NPNT
MALRD1	CLEC2A	PPIAL4D	ADAMTS16	ITGB3		TNXB
CFHR4	CLEC2B	RNASEK-C17orf49	MMP20	CRISP3		MMP12
CSMD2	CLEC2D	BLOC1S5-TXNDC5	COL7A1	TMPRSS11D		COL4A1
THSD7A	CLEC2L	HNRNPUL2-BSCL2	ST14	PRSS23		EFEMP1
CRB2	CLEC4A	PLSCR3	MMP16	HPN		THBS2
ATRNL1	CLEC4C	AGPS	F7	C7		NID2
SEZ6L2	CLEC4D	DDX39A	MEGF10	CD46		COL12A1
VLDLR	CLEC4E	PDLIM1	CHRDL1	CNTN3		MMP2
FNDC3A	CLEC4F	MYO1C	ADAMTS8	PRSS3P2		MMP9
CR1L	CLEC4G	MYO1F	OTOG	ITGB2		LTBP1
FNDC3B	CLEC4M	SNAP23	MMP14	PRSS29P		COL14A1
LRP12	CLEC5A	FXYD1	COL8A2	MRC1		COL4A5
UMOD	CLEC6A	AIP	LAMA1	ICAM1		COL15A1
ITGBL1	CLEC7A	STXBP3	COL13A1	PTPRM		ADAMTS4
NOTCH2NL	EMCN	RAB27B	ADAMTS9	CRTAC1		F12
KLK13	GPC2	AP3B1	ADAMTS3	VSIG4		COL6A2
LRP10	GPC3	NDUFS8	MMP3	IGHA1		SRPX
THSD7B	GPC5	PSMD11	COL9A1	ITGAX		LAMA5
TMPRSS6	GRIFIN	PSMD12	MEGF11	ITGA1		DMBT1
SSC4D	LGALS13	PSMD9	COL28A1	PCDH1		COMP
CR2	LGALS14	PGRMC1	ADAMTS5	C6		FBLN5
LRP8	LGALS16	DFFA	ADAMTS13	TPSD1		MMP8
CR1	LMAN1L	HIP1	COL25A1	NEO1		LTBP2
LRP3	MUC12	CLIC1	ADAMTSL1	AZU1		LAMC3
TMPRSS2	MUC15	EIF3F	ADAM19	SGSH		SEMA3G
NRXN3	MUC21	QSOX1	SEMA4A	MAMDC2		PAPLN
CELSR3	MUC22	IPO5	CELA3B	TMEM2		LAMA3
NAGPA	MUC7	EML1	MMP25	MARCO		MMP19
KLK8	MUC8	DNM1L	COL9A3	CFP		COL6A1
TMPRSS9	MUCL1	RTCA	VWCE	PIGR		COL6A3
TENM4	PARM1	GOLIM4	C1QL3	PTPRF		COL21A1
CTRC	PLXDC1	BTN3A3	NTNG2	CHIT1		MMP28
TENM1	PROL1	BTN3A1	LOXL4	CPZ		LAMB1
CUBN	REG4	PSMD14	ADAM8	KLKB1		MUC5B
CD248	SDC4	KPNA3	CELA2B	ITGB1		TINAGL1
OVCH2	SEMA3D	STK25	ADAM15	CP		ADAM10
TENM2	SFTA2	USP9Y	SEMA3F	PTGFRN		BGN
PTPRS	SFTA3	SDCBP	ADAMTS18	CPVL		COL10A1
OVCH1	CST11	NOP56	KAL1	DSG1		LAMA2
TENM3	CST7	DDX3X	ADAMTS6	CDH1		HPX
PROZ	CST8	RNASET2	MATN3	SIRPA		COL8A1
PTPRH	CST9	MFNG	SEMA6C	DPP4		SERPINA4
SCARF2	CST9L	PODXL	ADAMTSL2	DDOST		THSD4
TMPRSS7	CSTL1	KPNA4	EGFLAM	LMAN2		SEMA3C
LIFR	CTSO	MAN2B1	MST1	ESAM		A2ML1
PRSS33	EGLN1	FBP2	LOXL3	SIGLEC9		LAMC1
CELSR1	EGLN2	UBE2C	TNN	SORT1		LPA
SDK1	EGLN3	ACACB	ADAM22	ISLR		IGFBP7
NRXN1	FAM20A	PDXK	PODNL1	FETUB		PODN
MPL	FAM20B	PLPP3	PCOLCE2	DKK2		SERPINB6
ITGB8	HMSD	ARID1A	MMP1	HLA-DRB1		S100A12
TPSB2	HYAL1	DPYSL4	MMP10	A1BG		MASP1
CFHR2	HYAL2	GAPDHS	LOXL2	CTBS		GDF10
TNFRSF8	HYAL3	HSPB6	COLQ	CMA1		WNT11
CELSR2	HYAL4	COPE	C1QL2	GNS		WISP2
ADGRB2	KY	AP3D1	F13B	HLA-DRB3		SFTPD
TNFRSF1B	LEPREL1	CCS	EGFL7	ITGA2		F2
TNFRSF1A	LEPREL2	ABLIM1	CYR61	NEGR1		HCFC1
ADGRB1	NGLY1	IMPA2	PAMR1	PRTN3		FCN3
IL27RA	OGFOD1	CDIPT	CLEC18A	SSC5D		SERPINB8
CSF3R	OGFOD2	PDCD5	MMP11	GZMM		COL18A1
NRP2	P4HA3	SLC9A3R1	EYS	C5		AMBP
IL6R	P4HTM	TPP1	COL26A1	SPINT1		CILP2
TMEFF2	PAPPA2	TCERG1	TLL1	ITGAM		MATN2
GZMH	PI3	APOL1	COL9A2	VASN		WNT2B
TMPRSS5	PLOD1	PSMA7	NTNG1	SIRPG		LUM
PTPRT	PLOD2	SCAMP3	SEMA4D	EFNB1		CTSC
NRXN2	SERPINB2	IFIT3	COL23A1	SIGLEC7		MFAP4
GZMK	SERPINE3	MGST3	GAS6	IGHG2		PRSS1
FAT4	SERPINI1	TAX1BP3	TLL2	SIRPB1		HABP2
TIE1	SERPINI2	LIN7A	SEMA5B	RCC1		COL6A6
LDLR	SPAM1	RGS12	OTOL1	MANBA		SERPINA5
TMEFF1	TGM6	UBE2L6	WISP1	IGHD		DCN
SORL1	TIMP4	CASK	C1QTNF5	IGHG4		SEMA3B
CNTN5	AMH	UQCRQ	COL27A1	ITGA6		COL6A5
PTPRB	ANGPT1	MYL12B	ADIPOQ	DPP9		SERPINA3
CDON	ANGPT4	HGS	CRLF1	TNS3		F9
IL12RB2	ANGPTL1	PPP1R12A	NELL2	IGKV4-1		HMCN1
KLK15	ANGPTL3	HNRNPDL	SCUBE1	TNFRSF19		IGFALS
PROS1	ANGPTL5	XPO1	MUC6	MCAM		WNT9A
CTRL	AREG	ATP2A1	CRISPLD2	IGHG1		LRG1
TNFRSF11A	ARTN	SPTBN2	NOV	ARSA		SERPINF1
CEMIP	BDNF	MAST4	PCSK5	LECT2		S100A4
PRSS22	BMP6	SEC16A	CELA2A	MET		CSPG4
UNC5B	BRINP2	SYNM	COL20A1	BCAM		CTSA
LDLRAD3	BRINP3	PFAS	WNT10A	C8A		PCOLCE
SEZ6	BTC	NPC1	BMP8A	NPTN		HGFAC
LILRB2	CBLN2	SCAMP2	SCUBE2	IGKV1-5		PXDN
KLK12	CBLN3	ARPC1B	ADAMTS14	IGHM		SERPINA6
ARSH	CCL14	ARPC2	ZP1	HPR		FCN1
CD5	CCL15	ARPC3	SEMA7A	PTPRG		SERPINH1
KIAA0319L	CCL16	PLSCR1	TSKU	VNN2		TGM5
FAT3	CCL17	PGRMC2	EDIL3	ITGAD		VTN
CPXM1	CCL20	SMAD9	SRPX2	SUMF1		LGALS1
DCC	CCL22	CLIC2	ADAMTS15	ITGA5		TGM4
IL6ST	CCL23	ACOX3	MXRA5	LAMP2		PLXND1
RELT	CCL24	SURF4	MBL2			LAMB3
NECTIN3	CCL25	MAPK13	NTN5			SERPINB1
NETO1	CCL26	ALOX15B	FREM2			FREM1
TYRP1	CCL27	PPM1G	ADAM2			ELANE
OSMR	CCL3	EIF3D	SEMA4B			PLG
CNTN2	CCL3L3	EIF3H	C1QA			ASPN
DCBLD1	CCL4	BCAT2	CLEC18B			A2M
PRSS44	CCL4L1	NCAM2	SCUBE3			CD109
LILRB1	CCL4L2	STX7	VIT			PF4
LILRB5	CCL7	ARPC5	WNT5A			HRNR
PRSS8	CLCF1	DDX3Y	MMP13			IGSF10
IL31RA	CNTF	TAPBP	SERPINA11			CILP
UNC5D	CRHBP	DHX15	BMP1			PF4V1
GALNS	CRLF3	ZZEF1	C1QC			SERPINA1
KREMEN2	CSF1	PHGDH	ADAMTSL5			PRELP
PTPRQ	CSF2	NDUFS4	MMP24			CTSZ
DCBLD2	CSF3	2020-09-04	NELL1			HRG
CFHR1	CSH1	DYNC1LI2	SERPINE1			S100A9
SIRPB2	CSH2	PSMD3	ADAMTS2			PZP
LTBR	CSHL1	PAPSS1	C1QB			SERPINB9
HHIPL2	CTF1	ZW10	TGM3			CTSH
IL12RB1	CX3CL1	SPINT2	C1QL4			PRG3
NGFR	CXCL10	TGFB1I1	ADAMTS7			AGT
DLK2	CXCL11	HSPA12A	S100A1			PLXNB2
TNFRSF25	CXCL6	HNRNPR	SEMA6D			HTRA1
PCSK4	CXCL9	TXNL1	ADAMTSL4			LGALS9
KIR3DX1	DHH	TPD52L2	ADAMDEC1			S100A11
INSRR	EDA	EMC8	WNT5B			LGALS7
TYR	EPGN	ANP32C	COLEC11			SPON1
DCT	EPO	HTRA2	HAPLN3			ITIH1
VSIG10L	EREG	AKR7A2	WNT6			CXCL13
KLK7	FASLG	EPB41L2	CELA1			MFGE8
IL11RA	FGF11	TGOLN2	ADAM20			CTSS
LDLRAD2	FGF12	LAMTOR5	SEMA4C			MUC5AC
PKHD1	FGF13	SGCE	ITLN2			ANXA4
CD27	FGF14	DENR	WISP3			CTSD
CA10	FGF16	TRAPPC3	MUC2			TGFBI
PRSS53	FGF17	CHMP2A	S100P			ANXA7
PTPRK	FGF18	NCK2	VWDE			SERPINB4
PROC	FGF19	RGS10	BMP4			CTSG
LRRC70	FGF21	ZNF207	WNT7A			FLG2
LEPR	FGF22	NDUFA2	SERPINE2			CLEC3B
TNFRSF6B	FGF23	ASNA1	EMID1			LGI4
ANTXRL	FGF3	BUB3	HMCN2			ANXA11
WFDC3	FGF4	ACTN4	WNT7B			SBSPON
ITGAL	FGF6	HTATSF1	ADAM33			CTSB
KLK4	FGF7	AP1G1	CCBE1			S100A8
ROBO3	FGF8	SGTA	CHAD			F13A1
TEK	FGFBP1	SLC25A20	CSPG5			TGM2
UNC5A	FGFBP3	NARS	S100B			PRG2
TMPRSS11A	FIGF	MYO1B	MMP15			S100A10
LILRA1	FLT3LG	NUDT21	SEMA4G			MUC16
ACR	FSTL1	LANCL1	MUC4			OGN
SCARF1	GDF1	STRN	EPYC			CXCL12
TMPRSS4	GDF3	IDH3B	CHRD			CCL19
LDLRAD1	GDF5	CALU	HAPLN4			LOXL1
KLK9	GDF6	AHCYL1	KERA			SERPINB3
MFRP	GDF9	KIF1C	BCAN			SLPI
PTPRU	GDNF	TYROBP	HAPLN1			TIMP3
TNFRSF14	GH1	VEGFD	ADAMTS1			IL17D
PTPRD	GH2	NDUFS5	CXCL3			SERPINC1
LILRB3	HBEGF	PEX1	F10			TIMP1
CTRB1	IFNA1	RAD21	CELA3A			FGG
ITGB7	IFNA10	KALRN	CTSV			MUC1
SDK2	IFNA13	SSSCA1	PAPPA			CCL21
ARSD	IFNA14	GMFG	NYX			ANXA3
FAT1	IFNA16	PPP1R12B	OIT3			ANXA2
LAG3	IFNA17	PRPSAP2	PLAT			S100A16
IGSF9B	IFNA2	SPAG9	SEMA5A			PPBP
DSCAML1	IFNA21	KIF5C	TINAG			S100A6
PCDH15	IFNA4	NUAK1	SERPINB10			MDK
OSCAR	IFNA5	KIF1B	LGALS8			LGALS9B
PTPRO	IFNA6	NME2P1	ADAM21			PLXNC1
PMEL	IFNA7	PPL	COL17A1			WNT9B
CD33	IFNA8	ACSL4	NCAN			WNT2
FAT2	IFNB1	SNX3	ACAN			SFTPA1
BOC	IFNE	SORBS3	ADAM11			TNFSF13
KLK5	IFNG	SYNCRIP	ADAM28			ANXA5
NLGN1	IFNK	GMDS	LGI1			SERPIND1
KIRREL2	IFNW1	DIAPH1	SERPINB5			ITIH4
KLK2	IGF1	SELENOF	ZP3			S100A13
LY75	IGF2	PLIN3	MUC17			EMILIN1
HEPH	IHH	UGDH	INHBE			CLC
PRSS48	IL10	ABCC9	SERPINB12			VCAN
CDSN	IL11	CTNND1	RELN			ANXA1
PKHD1L1	IL12A	EIF1B	HPSE			ANGPTL4
PRSS21	IL13	SNX2	FMOD			LOX
PCDH7	IL15	DPM1	LGALS4			SERPING1
DKK4	IL17A	USO1	CST3			FGB
IGDCC4	IL17B	MRPS14	OPTC			SERPINA7
LY9	IL17C	TOM1	RSPO4			LAMA4
PRSS50	IL17F	HNRNPCL1	ADAM23			S100A14
CNTN6	IL19	HIST1H2BK	TGFB1			PRSS2
GP6	IL1A	CCDC22	FGL1			IL16
LRRC15	IL1B	PRAF2	CBLN4			POSTN
EGFEM1P	IL1F10	DKC1	INHBC			SERPINF2
LILRA4	IL1F5	DNAJA2	ADAM7			ELN
CD96	IL1F6	CUTA	CPN2			LGALS3
HAVCR1	IL1F7	RAMP2	CXCL1			ITIH2
PRSS36	IL1F8	PFDN1	LGALS2			PLXNA4
IL21R	IL1F9	NOL3	HTRA3			PLOD3
ITGB6	IL1RN	DTNB	CTGF			GDF15
ITGA10	IL2	WDR1	EGFL6			C17orf58
DSCAM	IL20	AOC2	TMPRSS15			ANXA6
DKK1	IL22	LDB3	SEMA4F			DPT
ADGRB3	IL23A	ROCK2	OMD			LMAN1
FSTL4	IL24	CPNE3	VWA2			ITIH3
IGSF9	IL25	RNF40	ADAMTS19			PLXNA2
STS	IL26	DNAJC13	MATN4			SFTPA2
TMPRSS11B	IL3	DNAJB6	ADAM32			MGP
PSG11	IL34	COQ9	PXDNL			FGA
KLK14	IL4	GGCT	CTSK			PLXNA1
SMG8	IL5	NDUFS7	CLEC3A			PLXDC2
CDH22	IL6	NDUFS2	ADAM18			ABI3BP
KIR2DS2	IL7	PDCD6	ADAM30			CSTB
PRSS43	IL9	TBCA	MMP27			SLIT1
KIR3DL3	INHA	ATP6V1G1	PRSS3			KNG1
SIGLEC12	INS	VPS4B	SMOC1			SPARC
KIR3DL2	INS-IGF2	MPDU1	MMP17			MFAP5
CDHR3	INSL3	H2AFY	BMP8B			COLEC12
DMKN	INSL5	SH3BGRL	IGFBP6			PRG4
LILRA3	INSL6	FLNB	MUC13			MMRN1
SARAF	ISM2	NDUFS6	HSPC159			MFAP2
CD180	KITLG	CS	CHADL			EMILIN2
CTRB2	LEP	SEC22B	CST6			SPARCL1
CD300LG	LIF	TACC1	C1QTNF2			MMRN2
ROBO2	LTB	VPS26A	NTN1			LGALS9C
CNTN4	NGF	NDUFB1	HAPLN2			EBI3
NRROS	NRG1	PMPCB	HPSE2			SERPINA2
CDH4	NRG4	ERLIN1	CBLN1			AEBP1
DDR1	NRTN	NDUFS3	MMP7			ECM1
TMPRSS11E	NTF3	SRSF10	WNT10B			P4HA2
CNTN1	NTF4	ECI2	KAZALD1			CCL18
PRSS54	OSM	BANF1	MATN1
HEPHL1	PDGFC	SF3B1	CRELD2
NFASC	PDGFD	CSDE1	ADAM29
KIR2DL4	PGF	PRKRA	VWA1
CFHR3	PIK3IP1	PGLYRP1	MMP21
CD320	PRL	LYPLA1	LEFTY1
TMPRSS3	PSPN	CREG1	SEMA6A
PRSS27	RPTN	TIPRL	GLDN
ARSF	S100A2	PPM1B	CTSL
TREML2	S100A7A	UTP20	PCSK6
KLK10	S100A7L2	RP2	ITIH6
KLK11	S100G	SLC25A12	LAMC2
TPSG1	SFRP4	PALM	WNT1
CEACAM19	SFRP5	EIF3G	SDC3
L1CAM	TCHHL1	EIF3J	ANGPTL7
KIR2DS5	TGFA	CBR3	ADAMTSL3
IGSF11	TGFB3	ZMPSTE24	HTRA4
PCDHAC1	THPO	IDH1	DSPP
CEL	TNF	MMP23A	ZP2
F11	TNFSF11	PAK3	BMP3
FLRT3	TNFSF12	ARL6IP5	CST1
LILRA6	TNFSF13B	DYSF	TGM1
ARSB	TNFSF14	DCTN3	IGFBP5
KIR2DL1	TNFSF15	ATP5H	HGF
NRCAM	TNFSF18	TSPAN9	FRZB
CD6	TNFSF4	FLOT1	LEFTY2
FLRT2	TNFSF8	ATP5L	CRISPLD1
PCDH11Y	TNFSF9	WFS1	CLEC14A
PLA2R1	VEGFA	NEBL	SEMA6B
KIR2DL3	VEGFB	CIAO1	FLG
SIGLEC8	WFIKKN1	SRP72	SPON2
PCDH11X	WFIKKN2	DDAH1	TECTB
GZMA	XCL1	MTA2	FREM3
KIR2DL2	XCL2	ALDH1A2	CCL28
OMG	ZFP91	STK10	CXCL14
LRP5		GFPT2	AMELX
KIR2DL5B		TPPP	ITLN1
PCDH9		TOMM70	OVGP1
CRISP2		MYO1D	MUC20
NETO2		MICAL2	SPOCK1
KIRREL1		UFL1	SFRP2
PSG5		SORBS2	VWA5B2
CD300C		SUN1	SERPINB11
LILRA2		PLPBP	FNDC1
RTN4RL2		ERLIN2	WNT3
BTNL3		PRPF6	PLAU
FAP		ABCA8	TIMP2
DSC2		ENDOD1	FGF1
CDH11		AP2A2	MMP23B
PCDHGB7		SEC31A	ZP4
CDH24		NDUFB6	SERPINA9
LRRC55		NDUFB4	SHH
LRIG1		NDUFB8	AMELY
PCDH19		NDUFA7	GDF7
CHL1		VAMP5	BMP7
PSG2		RTN3	COCH
LRRC4C		LETM1	S100A7
CD22		STBD1	C1QTNF9
NXPH3		LUC7L3	C1QL1
DGCR2		ATE1	TPO
FURIN		VAPB	CLEC18C
C17orf99		NDUFC2	TGFB2
SMPD3		NDUFA10	FGL2
RTN4RL1		FKBP9	SPOCK3
DSC1		CELF2	VWC2L
PLPPR4		PGLS	SULF2
TNFRSF21		PAPSS2	ITIH5
INSR		IPO7	FSTL3
IL9R		TNFAIP8	WNT4
SUSD4		PGM3	WNT3A
DSG3		UTS2	WNT16
PRLR		SVIL	FGF9
OPCML		SLC34A2	CRNN
KLK1		APOM	IBSP
KLK6		FMNL1	MEGF9
NPHS1		H6PD	FGF2
NEU3		ADGRL2	CTSF
FAS		ETHE1	MST1L
CD40		ACSL3	C1QTNF3
MST1R		CDS2	NRG2
KIR3DL1		RAB3D	SDC2
CUZD1		CPNE6	FAM20C
IL23R		OXSR1	INHBA
IL13RA1		HSPA4L	SERPINB13
TMPRSS11F		PTBP3	GPC4
FCRL3		IL33	SPOCK2
PRSS41		LSM8	IL12B
GAS1		AP2A1	AMBN
HAVCR2		DDX58	SEMA3A
PCDHGC3		STAU1	SMOC2
LRIG3		CAVIN2	CXCL2
PCDH10		BAG2	ASTL
TNFRSF10B		BAG3	TGM7
VSIG1		MAP4K4	C1QTNF9B
GHR		CRYZL1	GREM1
SIGLEC5		AIFM1	MFAP3
DCHS1		CLIC3	CSTA
FCRLA		EML2	SLIT3
NLGN3		GNA14	HCFC2
SLC3A1		NUDT14	PTN
CEACAM18		TSPAN13	EGFL8
KIR2DL5A		DDAH2	SFRP1
TNFRSF10C		TXNDC12	GPC6
LRP4		RECK	ANGPTL6
C4BPB		NUDT3	CFC1B
PCDH17		AGR2	WNT8A
SIGLEC11		NDUFB10	COLEC10
KIR2DS1		NAPSA	SLIT2
TNFRSF10D		CYB5A	ANGPTL2
IGSF1		ADH1B	FST
CDH7		ADH1C	GPC1
NLGN4Y		LDHA	MUC3A
CA11		ALDH1A1	NRG3
KREMEN1		GLUD1	C1QTNF8
LAIR2		CYB5R3	REG1B
IL2RB		GSR	WNT8B
RAET1G		MT-CO2	C1QTNF7
ICAM3		SOD1	FNDC7
PRTG		F8	CTSW
TLR8		PNP	CTHRC1
SUSD5		HPRT1	REG3G
ARSJ		GOT2	SULF1
PSG1		EGFR	FCN2
TDGF1P3		PGK1	WIF1
F3		AK1	ADAM17
KIR3DS1		CFD	SERPINB7
IL18RAP		ADA	BMP2
GZMB		MT-ATP6	MUC19
LRRTM1		CA1	REG3A
ZAN		CA2	FGFBP2
CD200R1		ASS1	S100A5
LYPD5		C3	CDCP2
FCGR2A		NRAS	VEGFC
TNFRSF4		HRAS	MEP1A
GLIPR1L1		KRAS	IGFBPL1
CDH15		JCHAIN	IGFBP4
DDR2		IGHV3-23	DMP1
IFNAR1		IGKC	ECM2
IGKV1D-12		IGHG3	IMPG2
VSIG10L2		IGHA2	CXCL5
DNASE2		HLA-A	ESM1
ARSE		HLA-H	PLXNB3
IL10RA		HLA-DRA	C1QTNF6
TNFRSF9		HLA-DQA2	CCL1
NCR2		HLA-DQB1	CLEC11A
FCRLB		HBZ	LEPRE1
NOTUM		HBD	HHIP
OC90		HBE1	SPP1
SIGLEC10		MB	NDNF
ILDR2		CRYAB	BMP15
MUC3B		LMNA	FGF10
CDH23		SPTA1	INHBB
LINGO1		TNNC2	EMILIN3
VSIG8		APOA1	CST5
IFNGR1		APOE	PLXNA3
MXRA8		APOA2	FNDC8
ACP7		APOC3	CCL11
CDH12		PMP2	MEP1B
CDH2		SLC4A1	SEMA3E
CDHR5		CRP	PLXNB1
IL2RG		APCS	CCL2
NEU1		C9	BMP10
CDH3		RBP4	VWC2
PSG8		ORM1	LTA
WFDC8		AHSG	ZPLD1
PSG3		TTR	LGALS12
PSG7		ALB	CFC1
IL10RB		AFP	FGF20
TMPRSS12		GC	SERPINA10
PRSS55		TFRC	SERPINA12
LRIG2		TF	GDF11
FCRL2		LTF	CLEC9A
RTN4R		FTL	MMP26
LRFN1		FTH1	TDGF1
LRP6		MT2A	CST4
FLRT1		ANG	ISM1
FGFRL1		CAT	GDF2
PSG6		GBA	CXCL8
FCRL4		FUCA1	RSPO1
IGSF3		ALDOA	CCL13
PRSS37		APOB	CST2
PCDHA13		PRNP	CCL8
MDGA1		SOD2	ELFN2
PRSS57		OAT	ELFN1
R3HDML		THY1	CCL5
PSG4		CD74	REG1A
PCDHGB5		TUBB4A	FGF5
KIR2DS4		GAPDH	CPAMD8
ERVS71-1		ASL	MFAP1
CDH26		HLA-DPB1	S100Z
PCDHB1		CAPNS1	MSTN
PCDH8		MT1E	NODAL
PCDHGB4		HSPB1	IMPG1
IL7R		CYBB	MEPE
KLRB1		RPN1	TCHH
LRRC4B		RPN2
CHODL		GNAI2
EFNA4		HIST1H2AB
CD244		GYPC
IGSF8		ATP1A1
OVOS1		ATP1B1
CD69		APP
CADM2		ARG1
LRRC32		APOD
LILRA5		ALDH2
DSC3		SLC25A5
PCDHGB6		MPO
NCR1		PCCA
IGHE		PCCB
CEACAM5		ALPL
RNF43		EIF2S1
FSCN3		RPLP1
LRTM2		RPLP2
UMODL1		RPLP0
KLK3		FABP3
PCDHA10		SSB
CNTFR		PRKCB
CEACAM6		MYL1
CSF2RB		UROD
PCDHGB2		LCK
FOLH1		FYN
MDGA2		GSN
LRRTM2		PTMA
TREML4		ATP5B
CD68		APOA4
CYB5D2		EIF4E
TFPI2		CKM
NLGN2		ENO1
PCDHAC2		PYGL
PCDHA7		GPI
ADAM5		NPM1
ERBB4		TPM3
THSD1		ITGAV
IGKV1-33		HEXA
KIR2DS3		HIST1H2BJ
GRIN2D		EPHX1
IGKV1D-33		DBI
NECTIN1		LDHB
PCDHA9		NEFL
IGSF21		NEFM
KIAA1324L		GPX1
PPIF		PGK2
TLR7		P4HB
ROBO4		H1F0
VSTM2A		ACYP1
CDHR4		ADH1A
PCDHB3		C8G
LRFN3		CAPN1
FCAR		TUBB
IGDCC3		CA3
LILRB4		PSAP
IDS		HEXB
LRRN4		PFN1
CDH10		BPGM
EPOR		APRT
CEACAM7		EPRS
KIRREL3		LDHC
CDH17		HSP90AA1
PCDHB12		GALT
FAM189A1		HNRNPC
SLITRK1		UQCRH
ZDHHC8		YES1
LCT		LYN
BTNL8		TPM2
IGKV1-39		FH
LRIT3		RNASE1
OVOS2		RHOC
LRRC4		SLC3A2
IL5RA		GUSB
EFNA3		PFKM
TMEM123		HSP90AB1
GP1BA		GSTA1
TRIL		SOD3
IL20RA		ADH4
PCDHGA3		MME
CEACAM1		ITGA2B
IGKV6D-21		PDHA1
ARSG		PLEK
ASPHD2		CD14
IGF1R		CYC1
EDA2R		PTPRC
FCRL1		MYL3
SIGLEC6		SNRNP70
IL2RA		HCK
ERLEC1		FCGR3A
PRSS42		VIM
IGKV2D-28		RPS17
AMIGO2		KRT19
SLAMF1		GNAI3
LYZL4		RPSA
GP5		ENO2
PRSS45		HBQ1
WFDC1		ACAA1
AMY1A		SRP19
FBXO10		GSTA2
CD48		GSTP1
VSIG2		SNRPC
ICAM5		QDPR
MANSC1		HMGB1
IGKV1D-39		FBP1
SORCS1		GNAO1
IGKV1D-17		GSTM1
SIRPD		TPM1
PCDHGB1		CLTA
SIGLEC1		CLTB
PCDHA6		CNP
ROBO1		HMOX1
IGKV6-21		PDGFRB
CD276		DLD
TNFRSF10A		SNRPA1
PCDHA5		COX6C
NCAM1		TACSTD2
FCRL5		FGR
REELD1		PARP1
HEPACAM2		ALOX5
HEG1		LTA4H
PCDHGA5		ALDOC
SLAMF7		C4A
PCDHGC4		C4B
IL3RA		H2AFZ
IGKV1-12		HIST1H2AG
CD164L2		UQCRFS1P1
PSG9		IGLC6
LYPD3		IGLC1
CEACAM4		DHRS4L1
PCDHGA1		GSTT2
ENPP1		GSTT2B
PDCD1		POTEI
UNC5C		POTEJ
FCGR3B		UBB
RAG2		UBC
ILDR1		LIMS3
PRSS47		SAA1
IGKV2-28		SETSIP
BCHE		SULT1A3
CHI3L2		HSPA1A
IGKV5-2		PPIAL4G
CRISP1		FDX1
CHIA		RAP2A
CPD		RNASE2
DPP6		TROVE2
IGHV5-51		GAA
TARM1		RRAS
C3orf80		HIST1H1E
AMY2A		DLAT
EPHA6		TXN
CD101		COX5B
P2RX7		PRKAR1A
IGHV3-15		TFPI
SI		KIT
SLAMF6		ESD
KIAA1324		HSPD1
ANTXR2		CLU
IL1RL2		HSPA5
CPA4		MYH3
LRP11		ACP2
LTK		HSPA8
MICA		SLC2A1
FCRL6		EPB41
IL22RA2		PDHB
FCMR		PYGB
TLR9		PYGM
LRFN5		RALA
LRFN2		RALB
ZG16		SPTB
WFDC2		LAMP1
IGKV3-11		ACADM
CSF2RA		FGFR1
WBP1L		TOP1
NEU2		G6PD
CLEC20A		GNAT1
CDH18		DMD
NTM		MTHFD1
IGKV2-30		EPX
IGKV1-9		SCGB1A1
PCDH18		IGF2R
ITGA11		ADH5
IGKV3D-11		PRPS2
APCDD1L		PABPC1
LINGO2		PCNA
EPHA5		NEFH
TMEM25		SLC25A4
LDLRAD4		SLC25A6
CD300LD		IMPDH2
IGKV1D-43		TPR
IGHV5-10-1		CKB
IGKV1-17		CKMT1A
PCDH20		RNASE3
CDHR2		ACTN1
IGLV5-52		ACE
PCDHGA9		DEFA4
WSCD1		MYH1
		MYH7
		SRC
		PEPD
		XRCC6
		XRCC5
		COX4I1
		IFI30
		RNH1
		MYH6
		MYH8
		ATP1A3
		EEF2
		MT1G
		PDIA4
		ACP5
		TPT1
		ALAD
		HLA-E
		HLA-DRB4
		LCP1
		PLS3
		APEH
		ETFA
		GYS1
		PRKAR2A
		ENO3
		CD59
		GFAP
		MIF
		FOLR2
		CD99
		PRF1
		PRKCSH
		HCLS1
		FDPS
		CPM
		COX7A2
		ATP1B2
		AKR1A1
		PLA2G2A
		NCF1
		PKM
		HSP90B1
		MYL6B
		SNRPB
		COX6B1
		HNRNPL
		DARS
		JUP
		UQCRB
		CPA3
		FABP4
		GLUL
		AKR1B1
		ANPEP
		RAC2
		GSPT1
		PGAM2
		B4GALT1
		EZR
		ATP6V1B1
		FOLR1
		HPGD
		NME1
		RPS2
		DSP
		CD44
		NQO2
		H2AFX
		SPN
		CBR1
		ANK1
		ACADS
		PDGFRA
		GLB1
		PECAM1
		HIST1H1B
		HIST1H1D
		HIST1H1C
		EPCAM
		POR
		EPB42
		GNB3
		ATP2A2
		CD36
		PLCG2
		FAH
		STMN1
		YBX3
		NAGA
		HSPA6
		RHOQ
		GOT1
		BPI
		PRKCA
		AKR1C4
		CKMT2
		CAPN2
		DES
		HLA-G
		CTPS1
		ENG
		DDX5
		PFKL
		GM2A
		FLT1
		PSMC3
		TCP1
		RPL35A
		ARF4
		RPL7
		VCL
		GPX2
		LBP
		PTPRA
		SON
		RPL17
		PGAM1
		ATP5J
		TSPAN8
		GNAT2
		MYL12A
		NCL
		HK1
		POLR2C
		NDUFV2
		SRM
		ORM2
		NFKB1
		NCF2
		TYMP
		ATP2B1
		HLA-DPA1
		EIF2S2
		PGC
		ALOX5AP
		RAB3A
		RAB3B
		RAB4A
		RAB5A
		RAB6A
		PSMB1
		M6PR
		ATP4A
		HIST1H2AD
		COX5A
		LMNB1
		DDC
		MAK
		CAST
		NEB
		AGA
		PTMS
		PRPS1L1
		GSTM3
		ATP6V1B2
		ATP6V1C1
		CSRP1
		FLNA
		MAOA
		ACO1
		NT5E
		GPD1
		VDAC1
		FGFR2
		SDHB
		CD9
		COMT
		OSBP
		PCMT1
		FBL
		RPS4Y1
		GART
		PAICS
		SCP2
		UBA1
		GPX3
		NME2
		FGFR4
		HIST1H1T
		FDXR
		FGFR3
		UQCRC2
		CA4
		CES1
		TCEA1
		SFPQ
		PPIB
		ME2
		WARS
		RPS3
		GCSH
		JAK1
		AHCY
		HIST1H2BO
		CFL1
		EIF4B
		ATP2B4
		PAX3
		CPT2
		DTYMK
		EEF1B2
		ATP5F1
		TBXAS1
		ACP1
		ACAT1
		MYL9
		AZGP1
		MPST
		RPS12
		DNAJB1
		ATP5A1
		PSMA1
		PSMA2
		PSMA3
		PSMA4
		ITGA3
		PTX3
		MSN
		DDX6
		CTNNA2
		U2AF2
		RPL13
		IVD
		MGAT1
		HMGB2
		PTBP1
		TARS
		VARS
		EEF1G
		FKBP2
		STOM
		PON1
		MAOB
		YWHAQ
		MAPK3
		ATP6V0C
		CALML3
		RPL10
		RPA1
		APEX1
		CD82
		DCK
		CAD
		CALR
		MAP4
		CANX
		PSMB8
		PSMB9
		PSMA5
		PSMB4
		PSMB6
		PSMB5
		GSTM2
		ABCD3
		TMOD1
		ACADL
		NDUFS1
		MAPK1
		GCA
		LAP3
		CD34
		TPP2
		IMPA1
		PTPN6
		TKT
		CASP1
		LMOD1
		RBMS1
		PML
		EEF1D
		PDHA2
		MARCKS
		AQP1
		GNA11
		ALDH4A1
		ERP29
		PRDX6
		C21orf33
		BLVRB
		PRDX5
		DDT
		GCHFR
		PRDX3
		ATP5D
		RPL12
		ECHS1
		CMPK1
		PEBP1
		PDIA3
		PPP2R1A
		PPP2R1B
		CDC27
		FCER1G
		HLA-F
		HMOX2
		ADSS
		TSPO
		ADSL
		PKLR
		CLIP1
		SRI
		GSTT1
		ALDH1B1
		ALDH3A1
		POLR2B
		LCN1
		SDHA
		CORO1A
		GDI1
		MAT2A
		PRKAR2B
		FMO3
		SLC6A4
		DNAJA1
		AKT1
		UQCRC1
		HIBADH
		ATIC
		HNRNPH3
		HNRNPH1
		YWHAB
		SFN
		STIP1
		PRDX2
		GK
		CDA
		DCTD
		GBP1
		RPL9
		ACSL1
		CDH5
		KIF5B
		CSTF2
		LSP1
		DUT
		HIST1H2BB
		RNASE4
		SHMT1
		SHMT2
		HSPA1L
		HSPA4
		MPI
		PFN2
		CTNNA1
		CTNNB1
		PHB
		NF2
		RDX
		RPL22
		SPR
		KRT9
		SAA4
		AGL
		MYH9
		MYH10
		COPB2
		ACTN2
		ADD1
		ADD2
		BSG
		FUS
		DEK
		MYH11
		GLRX
		PPM1A
		KRT2
		HMGCL
		FLT4
		KDR
		PSMC2
		CHI3L1
		GGT5
		ARL3
		TRIM23
		MAP2K2
		ATP5C1
		ATP6V1E1
		CPOX
		RPL4
		LONP1
		PGM1
		PPP1CC
		FLT3
		GNL1
		DLST
		GMPR
		SRP14
		NUP62
		HPCAL1
		TAGLN2
		TALDO1
		SNCA
		ETFB
		GNAL
		ATP6V1A
		HSPA9
		EIF4A3
		RPS19
		RPL3
		MPV17
		ANP32A
		CAPG
		CAP2
		CCT6A
		NNMT
		PSMB10
		ADH7
		RPL13A
		STAT3
		MDH1
		MDH2
		HADHA
		EIF2S3
		MNDA
		PRPH
		PTGDS
		UBA7
		CSK
		GARS
		IARS
		FOLR3
		EIF1
		ACTR1B
		ECI1
		TMPO
		STAT1
		STAT5A
		AKR1C3
		MTOR
		PI4KA
		EPS15
		CASP3
		RPS27
		LRPPRC
		ACAA2
		RPL35
		PRCP
		PAFAH1B1
		MATR3
		BTD
		GPD2
		SSR1
		ALDH3B1
		SYK
		RANBP1
		NAMPT
		AFM
		PSMC4
		TSFM
		PPIC
		VDAC2
		ACADSB
		MAPK8
		MAPK9
		MKI67
		CRK
		CRKL
		GSTM5
		NSF
		RPL27A
		RPL5
		RPL21
		RPL28
		RPS9
		RPS5
		RPS10
		MAP1B
		GNPDA1
		YAP1
		UTRN
		IQGAP1
		HAAO
		GYG1
		STT3A
		CAPZA2
		CAPZB
		ALDH1A3
		QARS
		RPL29
		UQCRFS1
		ATP5O
		LIMS1
		PREP
		ME1
		PIP4K2A
		ARCN1
		ALDH3B2
		GCLC
		GCLM
		CD151
		GSS
		CCT5
		NES
		IDH2
		PITPNB
		HSPA7
		CD97
		MARCKSL1
		PXN
		ALDH9A1
		RPIA
		NASP
		FASN
		FNTA
		FNTB
		CCT3
		ARRB1
		TUFM
		ALDH7A1
		GLUD2
		SRP9
		PCYT1A
		AARS
		SARS
		PPM1F
		CASP4
		PSMB3
		PSMB2
		ACADVL
		ACOT2
		TMED10
		HINT1
		RANBP2
		NDUFV1
		SEPHS1
		CAMP
		ENTPD1
		HNMT
		GNAQ
		IDH3A
		SULT1A1
		SULT1A2
		CRIP1
		GDI2
		EMD
		CPT1A
		GATM
		VASP
		DNM2
		METAP2
		LRBA
		PPT1
		RPL14
		CCT8
		CCT4
		ATP1A2
		RAB5C
		RAB7A
		RAB13
		RAB27A
		PDE6C
		PLCD1
		BLK
		DUSP3
		SMARCA2
		SMARCA4
		GALK1
		SSR4
		BCAP31
		MECP2
		ALDH3A2
		ALDH5A1
		HSD17B4
		SUOX
		STAT5B
		DYNLT3
		VAMP7
		RPS6KA3
		HDGF
		CNN1
		UBE2E1
		NDUFA8
		PGD
		HNRNPM
		ARHGDIA
		ARHGDIB
		HNRNPF
		STAT2
		RIDA
		SMS
		HK2
		HK3
		THOP1
		AKR1C2
		CAPZA1
		CRIP2
		BLVRA
		SLC25A1
		PPP5C
		ACLY
		SUCLG1
		MVD
		COPB1
		COPA
		CLTCL1
		ITGA8
		MAPK12
		MAPK10
		SMTN
		IST1
		SEC24C
		SUB1
		RARS
		CACNA2D1
		USP14
		PRKAA2
		HSPA2
		BCAT1
		ATP12A
		RAD23A
		RAD23B
		NAGLU
		AK2
		EMP3
		ALDH18A1
		NAPA
		AIF1
		EIF5
		SLC12A2
		PSMD4
		PLTP
		CSE1L
		VCP
		HADHB
		AQP4
		MANF
		NCKAP1L
		AFDN
		NAP1L1
		CASP7
		ADK
		ADAR
		CDH13
		SEC13
		SNU13
		NPEPPS
		HNRNPH2
		OXCT1
		SUMO3
		EIF3B
		FCGRT
		BID
		ATP5J2
		MARS
		AP1S2
		ATP5I
		EIF6
		CAV3
		CLDN18
		H2BFS
		JAM2
		TMEM33
		PCBP3
		RAB25
		EPPK1
		MTPN
		HIST1H2BD
		RAB15
		DEFA1
		DEFA3
		GPX6
		ARPC4
		CD81
		TPI1
		EIF3E
		SEC61B
		PPP4C
		ROMO1
		MYL6
		ACTB
		RAC3
		EIF4A1
		RPS20
		PRPS1
		PSMA6
		CDC42
		DSTN
		GMFB
		RAB8A
		RAB4B
		RAB2A
		RAB5B
		RAB10
		UBE2D3
		UBE2M
		UBE2K
		UBE2N
		RAB14
		ACTR3
		ACTR2
		ACTR1A
		ARF3
		ABCE1
		RAP1B
		RAP2B
		RPS3A
		RPL26
		PSME3
		RPL15
		MAGOH
		RPL27
		ATP6V0D1
		PCBD1
		RHOA
		NCALD
		HSPE1
		LYZ
		VBP1
		STXBP1
		B2M
		NPC2
		SUMO2
		AP1S1
		NUTF2
		HNRNPK
		YWHAG
		RRAS2
		RPS7
		PPP1CA
		PPP1CB
		NCS1
		PSMC1
		PSMC5
		RPS8
		RPS15A
		RPS16
		UBE2H
		YWHAE
		RPS14
		RPS23
		RPS18
		RPS13
		RPS11
		SNRPE
		SNRPF
		SNRPG
		LSM3
		SNRPD1
		SNRPD2
		SNRPD3
		TMSB4X
		PSMC6
		RPL7A
		RAB11A
		ETF1
		CNBP
		RPS4X
		PPP2CB
		ACTA2
		RHOB
		RPL23A
		RPS6
		HIST1H4A
		HIST1H2BC
		RAB1A
		RAN
		RPL23
		RAP1A
		UBE2D2
		RPS15
		RPS24
		RPS25
		RPS26
		RPS28
		GNB1
		GNB2
		RPL30
		RPL31
		RPL10A
		RPL32
		RPL11
		RPL8
		PPIA
		FKBP1A
		RPS27A
		UBA52
		TRA2B
		RAC1
		AP2B1
		VAMP2
		GNAI1
		YWHAZ
		PPP2R2A
		SNRPN
		SUMO1
		DYNLL1
		DYNLT1
		SKP1
		RPS21
		EIF5A
		RACK1
		ACTG1
		ACTG2
		UBE2I
		PPP2CA
		YBX1
		SEC11A
		CSNK2B
		TPM4
		ACTC1
		UBE2L3
		EEF1A1
		ACTA1
		TUBA1B
		TUBA4A
		TUBB4B
		CSNK2A1
		PAFAH1B2
		HIST1H3A
		HBB
		NOMO3
		HBG1
		HBG2
		HBA1
		IGBP1
		EIF4G2
		CCT2
		OLR1
		RAE1
		BTN3A2
		GSTO1
		PRKDC
		MAP1A
		LCN2
		MT1X
		NUCB2
		HSD11B2
		ABAT
		BASP1
		DCD
		SARNP
		LACTB
		RPL24
		RPL36A
		CBX1
		SMAD3
		HPCA
		ARF1
		ARF5
		ERH
		RHOG
		RPL19
		MXRA7
		H3F3A
		ATP2C1
		CYCS
		PPP2R2B
		MPP1
		TFAM
		PITPNA
		MAT1A
		SLC25A3
		HDLBP
		CDK5
		PURA
		CLTC
		FKBP3
		REEP5
		SORD
		HNRNPU
		U2AF1
		SPTBN1
		SET
		SCN7A
		SRSF2
		FABP5
		ANK2
		CAP1
		DR1
		PFKP
		ATP2B2
		EWSR1
		PLCB3
		TAGLN
		GUCY1B3
		OGDH
		ALDH6A1
		HIST1H1A
		RPL18A
		FKBP4
		NUCB1
		RPL6
		TOP2B
		AKAP12
		SLC25A11
		DST
		GSTM4
		GNA12
		CAV1
		ACY1
		LMNB2
		TAP1
		TAP2
		RELA
		UBXN1
		GBE1
		EIF4G1
		GLO1
		AKR1C1
		SSBP1
		YWHAH
		PLP2
		DNM1
		PTK2
		SRSF11
		EEF1A2
		PRKCD
		CALD1
		PTPN11
		PPAT
		GFPT1
		AOX1
		PSME1
		PRDX1
		RPL18
		C1QBP
		CKAP4
		ENPEP
		TJP1
		KHDRBS1
		BAX
		KLC1
		ARHGAP1
		ACTN3
		SRSF4
		PPP3CA
		DHX9
		CRYZ
		GOLGA2
		LGALS3BP
		PUDP
		CD47
		RBBP4
		AHNAK
		APOBR
		CGNL1
		NEXN
		GALNT2
		AP1B1
		CPSF1
		BST1
		BST2
		PMPCA
		KIF1A
		SCRN1
		WASHC5
		TWF1
		ASPH
		AKAP13
		KIF5A
		STX4
		GRSF1
		CHD3
		SF3A3
		DPYD
		TP53BP1
		AIMP1
		ILF2
		ILF3
		EPS8
		FOXF1
		ANK3
		DLG1
		PPP1R8
		TIAM1
		ECH1
		STK4
		FLII
		COASY
		ACACA
		GPS1
		MTAP
		RLF
		PRKAA1
		CALCOCO2
		HNRNPA0
		PAK1
		PRDX4
		PAK2
		CBX3
		PSMD2
		DNAJC3
		SELENBP1
		NME3
		TRIM28
		G3BP1
		PTK7
		PABPC4
		EIF3I
		CTBP1
		UBE2V1
		MRPL49
		DYNC1I2
		ILK
		MSLN
		NNT
		SNTB2
		SF3B2
		GOLGA4
		LSAMP
		FKBP5
		ROCK1
		IL18R1
		PICALM
		SQSTM1
		TUBB3
		ASAH1
		PIN1
		CAMK2B
		CAMK2G
		CAMK2D
		DCTN2
		NAE1
		IQGAP2
		STIM1
		TRA2A
		SNX1
		DNASE1L3
		CUL3
		TSTA3
		RAB31
		FHL1
		FHL3
		ITGA7
		MOGS
		ATP1A4
		ALCAM
		TUBA3C
		SPTAN1
		ENPP2
		DDX39B
		BLMH
		SNTB1
		TUBB2A
		CAPS
		CBFB
		NFYC
		PRKG1
		COTL1
		COX17
		HNRNPD
		SCARB2
		DPYS
		DAG1
		DSG2
		44080
		SAFB2
		EIF3A
		SCRIB
		GIT2
		MLEC
		FHL2
		CRMP1
		DPYSL3
		DCTN1
		DYNC1H1
		EIF4A2
		CTTN
		FLOT2
		RCN2
		TRIM25
		FLNC
		FKBP8
		GNA13
		GALE
		GK3P
		CAPRIN1
		RBM39
		PDIA5
		HSP90AA2P
		ITPR2
		ITPR3
		ITPR1
		PLS1
		LAGE3
		CLINT1
		SMC1A
		MESD
		GANAB
		RFTN1
		SSPN
		MFSD10
		PPP2R5D
		LBR
		MVP
		CHD4
		LASP1
		PTGR1
		RAB39A
		KPNB1
		NOLC1
		NUMA1
		GAPVD1
		SPCS2
		EMC2
		WTAP
		ABRAXAS2
		44076
		SART3
		EFTUD2
		KARS
		ARHGEF6
		EIF4H
		ACAP2
		EEA1
		NCF4
		PDIA6
		PAFAH1B3
		AGER
		PEA15
		PGM5
		PMVK
		PLEC
		NOMO1
		PPA1
		PTGES3
		NONO
		PTPA
		QPRT
		RABEP1
		RAB35
		RNPS1
		RCN1
		PCBP1
		PCBP2
		ELOC
		ELOB
		SF3B3
		CNN3
		SAFB
		SF3B4
		SF3A2
		RBMS2
		SEC23A
		SEC23B
		SF3A1
		RGN
		TCEA2
		SLC9A3R2
		SF1
		TRIP10
		TRIP6
		MAPRE1
		DLG2
		MYLK
		HERC1
		SLC1A5
		MAPK11
		RAB30
		SMAD2
		UBE2V2
		STXBP2
		VAMP3
		ADIRF
		RAB11B
		ZFHX3
		ZYX
		ETFDH
		44081
		ADRM1
		INA
		PKN1
		CSRP2
		DDB1
		MAPK14
		CDC37
		DPYSL2
		SYPL1
		CALCRL
		OCLN
		CPSF6
		DBN1
		PTGIS
		TBR1
		FSCN1
		IFI16
		HIST3H3
		DECR1
		NDUFA5
		ATP2B3
		CLPP
		TST
		GSTA3
		GUK1
		HAGH
		HIST2H2AC
		HIST2H2BE
		NDUFA9
		PCK2
		HADH
		UGP2
		AOC3
		ATP6V1F
		CDO1
		TXNRD1
		IMMT
		HNRNPUL2
		INF2
		RPEL1
		SMU1
		HKDC1
		EIF2S3L
		HLA-DRB5
		HLA-B
		MYLK3
		LRRFIP1
		P3H1
		UAP1L1
		TKFC
		CCDC88A
		TUBB8
		PARP14
		GLYR1
		VPS26B
		GXYLT1
		IQCC
		TMEM119
		PABPC1L
		FAM98B
		PDCD4
		TP53I3
		PDLIM3
		HSD17B12
		LBH
		HS1BP3
		CYBRD1
		ACTBL2
		HSP90B2P
		HSP90AB4P
		HSP90AB3P
		HSP90AB2P
		HSP90AA5P
		HSP90AA4P
		TMEM41B
		MEST
		CMPK2
		SH3D19
		RPS26P11
		NOMO2
		MIA3
		PITRM1
		RAB41
		RRP12
		COA6
		TOR1AIP1
		AARS2
		GNAS
		UBE2NL
		SLC27A3
		HIST2H2BF
		TTC38
		COX20
		EXOSC6
		HP1BP3
		VARS2
		FRMPD1
		CHCHD2P9
		FKBP15
		IBA57
		UBR4
		KIAA1217
		BEND3
		C9orf64
		FAM69A
		L1TD1
		FHL5
		DDI2
		HIST2H3PS2
		THEMIS2
		NT5DC1
		CROCC
		RASIP1
		EMC10
		LCN1P1
		43891
		EEF1A1P5
		PDE4DIP
		HACD4
		MBNL2
		CARMIL1
		ZMYM4
		KRT79
		MIC13
		RNF213
		TNS2
		KANK2
		WASHC2A
		METRNL
		MAP1S
		PPP2R2D
		ARL6IP4
		LRRC66
		KCTD16
		ARHGAP17
		DUPD1
		CYB5R2
		ATL3
		HIST2H2BC
		HIST2H2BD
		SUMO4
		HIST2H2AA3
		PTRHD1
		LAIR1
		LAMTOR1
		TWF2
		TANGO2
		RAB12
		EIF5AL1
		NIPBL
		PDE12
		SLC25A24
		HIBCH
		H3F3C
		KANK3
		CAVIN1
		ERAP2
		LLGL2
		PRPF8
		PLBD1
		FAHD1
		TLDC1
		GIMAP6
		TUBA3E
		TTC37
		NCEH1
		DHRS4L2
		SLC30A9
		CORO6
		BLOC1S2
		AGTRAP
		POTEE
		MTHFD1L
		MOXD1
		TMEM205
		OLFML1
		OLFM4
		CXCL17
		BTNL9
		MPRIP
		RAB11FIP1
		SOSTDC1
		RBMS3
		NAPRT
		GIGYF2
		HSDL2
		KYAT3
[truncated: 925 more rows]
